# Supplementary material for: DNA damage response coregulator ddrR affects many cellular pathways and processes in Acinetobacter baumannii 17978
Source: Front Cell Infect Microbiol. 2024 Jan 11;13:1324091. doi: 10.3389/fcimb.2023.1324091 (PMC10808703; doi:10.3389/fcimb.2023.1324091)
Supplement: Supplementary file 3 [file Table_2.xlsx]

## Sheet: WT ind unmerged vs merged reads
Genes different between sets have Red colored text and cells
Unmerged Data Sets									Merged Data Set
Gene ID	baseMean	log2FoldChange	lfcSE	stat	pvalue	padj			Gene ID	baseMean	log2FoldChange	lfcSE	stat	pvalue	padj
KZA74_07410	317.25	2.31	0.36	6.45	1.09e-10	1.03e-08			KZA74_00195	402.69	0.58	0.19	3.11	0.0019	0.0325
KZA74_07415	448.16	4.47	0.58	7.72	1.13e-14	5.32e-12			KZA74_05595	1183.67	1.61	0.5	3.23	0.00126	0.023
KZA74_07420	489.57	4.31	0.61	7.04	1.98e-12	3.56e-10			KZA74_07410	381.98	2.3	0.41	5.6	2.18e-08	8.72e-07
KZA74_07425	241.47	4.17	0.72	5.8	6.81e-09	3.34e-07			KZA74_07415	654.02	4.44	0.55	8.02	1.02e-15	7.54e-13
KZA74_07430	96.77	4.13	0.88	4.69	2.7e-06	8.31e-05			KZA74_07420	721.2	4.29	0.59	7.24	4.63e-13	1.32e-10
KZA74_07435	122.61	3.71	0.78	4.75	1.99e-06	6.28e-05			KZA74_07425	482.88	4.11	0.66	6.23	4.57e-10	3.46e-08
KZA74_07440	1374.24	3.86	0.69	5.56	2.65e-08	1.1e-06			KZA74_07430	268.43	4.04	0.74	5.49	3.91e-08	1.45e-06
KZA74_07445	1927.24	3.88	0.78	4.98	6.5e-07	2.16e-05			KZA74_07435	296.78	3.63	0.71	5.13	2.83e-07	9.31e-06
KZA74_07450	352.94	3.56	0.72	4.96	7e-07	2.3e-05			KZA74_07440	3595.96	3.85	0.68	5.64	1.68e-08	7.09e-07
KZA74_07455	260.06	2.9	0.77	3.76	0.00017	0.00396			KZA74_07445	4509.75	3.87	0.74	5.2	1.99e-07	6.66e-06
KZA74_07465	341.68	1.2	0.38	3.16	0.00157	0.0294			KZA74_07450	804.41	3.53	0.7	5.07	3.93e-07	1.26e-05
KZA74_07470	184.46	1.47	0.44	3.35	0.000805	0.0163			KZA74_07455	1390.87	2.87	0.75	3.83	0.000129	0.0029
KZA74_07475	136.71	3.37	0.81	4.18	2.91e-05	0.000775			KZA74_07465	446.72	1.21	0.37	3.24	0.00118	0.0223
KZA74_07480	625.61	4.58	0.8	5.74	9.31e-09	4.34e-07			KZA74_07470	221.72	1.47	0.4	3.68	0.000235	0.00495
KZA74_07485	331.09	4.59	0.64	7.17	7.76e-13	1.8e-10			KZA74_07475	380.36	3.3	0.75	4.43	9.5e-06	0.000252
KZA74_07490	522.41	3.96	0.72	5.52	3.37e-08	1.37e-06			KZA74_07480	918.98	4.55	0.76	6.02	1.78e-09	1.1e-07
KZA74_07495	2007.48	3.91	0.77	5.07	4.02e-07	1.36e-05			KZA74_07485	690.3	4.56	0.64	7.08	1.45e-12	2.69e-10
KZA74_07500	646.86	4.09	0.66	6.24	4.4e-10	3.02e-08			KZA74_07490	880.1	3.94	0.7	5.59	2.25e-08	8.89e-07
KZA74_07505	944.23	3.45	0.71	4.85	1.25e-06	4.07e-05			KZA74_07495	3983.22	3.9	0.73	5.34	9.54e-08	3.37e-06
KZA74_07510	394.02	3.66	0.61	5.95	2.68e-09	1.45e-07			KZA74_07500	1529.93	4.08	0.64	6.37	1.95e-10	1.81e-08
KZA74_07515	646.69	3.42	0.62	5.48	4.37e-08	1.7e-06			KZA74_07505	1607.89	3.44	0.68	5.03	4.88e-07	1.51e-05
KZA74_07520	148.35	3.11	0.57	5.47	4.43e-08	1.71e-06			KZA74_07510	575.52	3.64	0.64	5.66	1.53e-08	6.6e-07
KZA74_07525	252.22	3.3	0.53	6.19	5.93e-10	3.93e-08			KZA74_07515	919.35	3.4	0.61	5.58	2.47e-08	9.56e-07
KZA74_07530	181.89	3.57	0.54	6.62	3.56e-11	4.21e-09			KZA74_07520	219.65	3.07	0.59	5.22	1.76e-07	6.11e-06
KZA74_07535	307.25	1.86	0.35	5.36	8.26e-08	2.97e-06			KZA74_07525	391.54	3.26	0.51	6.36	2.06e-10	1.82e-08
KZA74_07540	147.48	2.56	0.6	4.28	1.85e-05	0.000514			KZA74_07530	289.52	3.52	0.5	7.05	1.74e-12	3.08e-10
KZA74_07545	163.58	3.02	0.29	10.35	4.27e-25	8.07e-22			KZA74_07535	485.47	1.84	0.43	4.24	2.22e-05	0.000573
KZA74_07550	225.07	4.66	0.43	10.88	1.46e-27	5.54e-24			KZA74_07540	299.35	2.57	0.68	3.78	0.000158	0.0035
KZA74_07555	93.36	3.75	0.45	8.36	6.21e-17	5.87e-14			KZA74_07545	202.98	3.06	0.27	11.52	9.88e-31	3.67e-27
KZA74_07560	95.18	3.66	0.57	6.38	1.74e-10	1.49e-08			KZA74_07550	410.74	4.62	0.46	10.07	7.75e-24	1.44e-20
KZA74_07565	743.57	3.6	0.67	5.4	6.8e-08	2.52e-06			KZA74_07555	171.81	3.75	0.51	7.3	2.98e-13	9.23e-11
KZA74_07570	388.51	4.33	0.62	6.95	3.76e-12	5.93e-10			KZA74_07560	165.98	3.6	0.6	5.96	2.58e-09	1.43e-07
KZA74_07575	1687.21	3.78	0.7	5.42	6.04e-08	2.26e-06			KZA74_07565	1028.47	3.59	0.66	5.4	6.72e-08	2.4e-06
KZA74_07580	1634.23	4.07	0.64	6.35	2.21e-10	1.78e-08			KZA74_07570	649.61	4.31	0.68	6.36	2e-10	1.81e-08
KZA74_07585	1547.11	4.26	0.67	6.4	1.58e-10	1.39e-08			KZA74_07575	2286.35	3.78	0.68	5.54	3.02e-08	1.14e-06
KZA74_07590	396.04	3.01	0.64	4.73	2.27e-06	7.08e-05			KZA74_07580	2248.38	4.06	0.64	6.31	2.87e-10	2.48e-08
KZA74_07595	308.59	4.55	0.64	7.08	1.47e-12	2.93e-10			KZA74_07585	2196.33	4.25	0.65	6.56	5.41e-11	6.08e-09
KZA74_07600	236.11	4.62	0.66	6.97	3.14e-12	5.16e-10			KZA74_07590	736.79	3.02	0.62	4.85	1.24e-06	3.69e-05
KZA74_07605	2431.04	4.8	0.77	6.26	3.89e-10	2.72e-08			KZA74_07595	602.51	4.53	0.63	7.2	6.15e-13	1.52e-10
KZA74_07610	3380.58	5.15	0.72	7.16	8.08e-13	1.8e-10			KZA74_07600	520.41	4.58	0.66	6.92	4.37e-12	7.38e-10
KZA74_07615	1115.96	4.93	0.75	6.57	4.93e-11	5.48e-09			KZA74_07605	3743.45	4.8	0.73	6.58	4.71e-11	5.64e-09
KZA74_07620	446.37	5.32	0.73	7.27	3.54e-13	9.55e-11			KZA74_07610	5235.73	5.15	0.69	7.46	8.8e-14	3.63e-11
KZA74_07625	408.05	4.65	0.63	7.41	1.23e-13	4.67e-11			KZA74_07615	1795.73	4.92	0.72	6.82	9e-12	1.29e-09
KZA74_07630	528.44	4.13	0.62	6.68	2.38e-11	2.99e-09			KZA74_07620	634.11	5.29	0.68	7.74	9.91e-15	5.25e-12
KZA74_07635	610.19	4	0.52	7.68	1.63e-14	6.82e-12			KZA74_07625	578	4.62	0.64	7.21	5.72e-13	1.52e-10
KZA74_07640	526.42	3.85	0.53	7.2	5.85e-13	1.47e-10			KZA74_07630	674.91	4.11	0.6	6.86	7.09e-12	1.05e-09
KZA74_07645	314.07	4.58	0.62	7.4	1.36e-13	4.69e-11			KZA74_07635	774.19	3.99	0.54	7.33	2.25e-13	8.34e-11
KZA74_07650	530.12	3.71	0.48	7.79	6.88e-15	3.71e-12			KZA74_07640	673.93	3.83	0.54	7.14	9.25e-13	1.91e-10
KZA74_07655	577.91	4.17	0.74	5.62	1.86e-08	8.26e-07			KZA74_07645	385.19	4.57	0.6	7.56	3.89e-14	1.8e-11
KZA74_07660	2095.1	4.36	0.69	6.34	2.31e-10	1.82e-08			KZA74_07650	818.81	3.7	0.51	7.3	2.83e-13	9.23e-11
KZA74_07665	1780.61	4.65	0.77	6.06	1.36e-09	8.3e-08			KZA74_07655	759.36	4.16	0.73	5.71	1.15e-08	5.21e-07
KZA74_07670	729.78	4.37	0.76	5.78	7.41e-09	3.59e-07			KZA74_07660	2859.55	4.35	0.68	6.41	1.47e-10	1.48e-08
KZA74_07680	967.58	3.29	0.93	3.51	0.000442	0.0095			KZA74_07665	2659.59	4.64	0.74	6.24	4.35e-10	3.36e-08
KZA74_07685	85.05	2.87	0.57	5.07	3.99e-07	1.36e-05			KZA74_07670	1141.53	4.35	0.73	5.97	2.32e-09	1.35e-07
KZA74_07690	238.46	1.7	0.42	4.06	4.98e-05	0.0013			KZA74_07680	1321.76	3.28	0.87	3.77	0.000166	0.00367
KZA74_07695	420.35	1.97	0.54	3.67	0.000246	0.00554			KZA74_07685	105.82	2.85	0.61	4.68	2.93e-06	8.3e-05
KZA74_07700	5618.12	4	0.6	6.71	1.91e-11	2.49e-09			KZA74_07690	265.21	1.71	0.51	3.36	0.000773	0.0153
KZA74_07705	436.61	3.99	0.62	6.48	9e-11	8.72e-09			KZA74_07695	565.17	1.98	0.53	3.71	0.000209	0.00448
KZA74_07710	627.18	4.36	0.68	6.43	1.29e-10	1.16e-08			KZA74_07700	8016.75	3.99	0.58	6.87	6.57e-12	1.02e-09
KZA74_07715	413.35	4.13	0.68	6.11	9.74e-10	6.24e-08			KZA74_07705	574.41	3.97	0.6	6.58	4.86e-11	5.64e-09
KZA74_07720	4939.26	3.84	0.67	5.76	8.48e-09	4.01e-07			KZA74_07710	857.18	4.34	0.65	6.69	2.27e-11	2.91e-09
KZA74_07725	350.66	3.76	0.62	6.02	1.71e-09	9.76e-08			KZA74_07715	520.83	4.11	0.66	6.26	3.73e-10	3.01e-08
KZA74_07730	531.78	4.02	0.73	5.49	4.07e-08	1.62e-06			KZA74_07720	6983.23	3.84	0.64	5.96	2.55e-09	1.43e-07
KZA74_07735	412.58	4.14	0.7	5.91	3.38e-09	1.72e-07			KZA74_07725	427.58	3.74	0.64	5.81	6.13e-09	3e-07
KZA74_07740	133.97	4.44	0.71	6.29	3.18e-10	2.31e-08			KZA74_07730	690.65	4	0.73	5.48	4.25e-08	1.56e-06
KZA74_07745	240.06	2.68	0.45	5.97	2.39e-09	1.33e-07			KZA74_07735	534.33	4.12	0.68	6.08	1.18e-09	7.56e-08
KZA74_07750	636.54	2.64	0.49	5.39	6.94e-08	2.55e-06			KZA74_07740	154.53	4.39	0.67	6.6	4.15e-11	5.14e-09
KZA74_07755	183.46	2.29	0.52	4.37	1.23e-05	0.000344			KZA74_07745	329.69	2.67	0.47	5.68	1.33e-08	5.81e-07
KZA74_10215	46.37	1.75	0.42	4.13	3.68e-05	0.000966			KZA74_07750	945.76	2.63	0.52	5.09	3.67e-07	1.18e-05
KZA74_10220	242.75	2.65	0.66	4.01	6.04e-05	0.00156			KZA74_07755	226.1	2.26	0.46	4.9	9.51e-07	2.85e-05
KZA74_10225	268.1	2.24	0.7	3.17	0.0015	0.0284			KZA74_10215	70.73	1.75	0.42	4.18	2.89e-05	0.000721
KZA74_10230	218.13	2.94	0.64	4.57	4.83e-06	0.00014			KZA74_10220	366.64	2.63	0.63	4.19	2.78e-05	0.000697
KZA74_10235	596.49	2.84	0.61	4.66	3.23e-06	9.75e-05			KZA74_10225	334.28	2.22	0.67	3.3	0.000953	0.0184
KZA74_10240	1069.77	2.78	0.67	4.17	3.03e-05	0.000801			KZA74_10230	234.73	2.92	0.64	4.57	4.88e-06	0.000135
KZA74_10245	1350.24	2.45	0.63	3.89	0.000101	0.00246			KZA74_10235	751.45	2.84	0.58	4.92	8.86e-07	2.67e-05
KZA74_10250	337.31	3.04	0.57	5.37	8.02e-08	2.92e-06			KZA74_10240	1496.2	2.77	0.61	4.52	6.08e-06	0.000166
KZA74_10255	382.15	2.4	0.53	4.5	6.88e-06	0.000197			KZA74_10245	2013.23	2.45	0.58	4.2	2.69e-05	0.000679
KZA74_10260	2252.83	2.65	0.68	3.9	9.79e-05	0.0024			KZA74_10250	535.26	3.04	0.53	5.74	9.65e-09	4.48e-07
KZA74_10265	148.79	2.24	0.62	3.62	0.000292	0.00645			KZA74_10255	477.4	2.39	0.51	4.66	3.15e-06	8.86e-05
KZA74_10270	917.2	4.04	0.72	5.57	2.48e-08	1.04e-06			KZA74_10260	3359.36	2.64	0.62	4.26	2.05e-05	0.000531
KZA74_10275	796.29	3.77	0.82	4.61	4.01e-06	0.00012			KZA74_10265	262.03	2.24	0.56	3.97	7.05e-05	0.00168
KZA74_10280	452.7	3.76	0.78	4.83	1.38e-06	4.42e-05			KZA74_10270	1421.55	4.03	0.68	5.97	2.39e-09	1.36e-07
KZA74_10285	342.17	2.71	0.75	3.59	0.000333	0.00728			KZA74_10275	1174.88	3.76	0.75	5.01	5.42e-07	1.66e-05
KZA74_10290	364.36	2.96	0.76	3.92	8.93e-05	0.00222			KZA74_10280	693.98	3.74	0.72	5.19	2.13e-07	7.07e-06
KZA74_10295	213.63	3.39	1.02	3.32	0.000911	0.0181			KZA74_10285	476	2.69	0.69	3.88	0.000105	0.00242
KZA74_10300	186.52	3.6	0.77	4.7	2.57e-06	7.96e-05			KZA74_10290	484.06	2.94	0.69	4.27	1.96e-05	0.000512
KZA74_10305	1744.42	3.55	0.89	3.98	7.01e-05	0.0018			KZA74_10295	290.44	3.36	0.9	3.75	0.000174	0.00382
KZA74_10315	850.75	2.53	0.7	3.62	0.000291	0.00645			KZA74_10300	243.75	3.54	0.7	5.04	4.6e-07	1.45e-05
KZA74_10325	146.75	2.45	0.7	3.51	0.000451	0.00962			KZA74_10305	2830.9	3.54	0.81	4.37	1.26e-05	0.000331
KZA74_10330	239.37	2.36	0.67	3.52	0.00043	0.00928			KZA74_10310	703.78	2.21	0.75	2.96	0.00309	0.0499
KZA74_10335	548	3.99	0.72	5.52	3.47e-08	1.39e-06			KZA74_10315	1319.94	2.52	0.65	3.88	0.000103	0.00239
KZA74_10340	200.02	2.81	0.73	3.85	0.000117	0.0028			KZA74_10325	194.68	2.43	0.68	3.57	0.000362	0.00738
KZA74_10345	111.38	3.93	0.86	4.59	4.38e-06	0.000128			KZA74_10330	354.29	2.34	0.63	3.72	0.000201	0.00434
KZA74_10355	333.08	3.31	0.78	4.23	2.36e-05	0.000632			KZA74_10335	681.79	3.98	0.68	5.84	5.25e-09	2.67e-07
KZA74_10360	494.14	3.25	0.85	3.82	0.000131	0.00309			KZA74_10340	248.49	2.78	0.7	3.99	6.61e-05	0.0016
KZA74_10370	67.51	2.28	0.58	3.93	8.61e-05	0.00215			KZA74_10345	142.7	3.88	0.94	4.12	3.85e-05	0.000945
KZA74_10375	153.01	1.58	0.43	3.68	0.000234	0.0053			KZA74_10350	71.66	2.43	0.81	3.02	0.00251	0.0421
KZA74_10385	309.08	2.17	0.6	3.62	0.000299	0.00658			KZA74_10355	512.75	3.29	0.74	4.47	7.68e-06	0.000208
KZA74_10425	682.95	4.21	0.72	5.87	4.38e-09	2.21e-07			KZA74_10360	605.22	3.24	0.98	3.3	0.000966	0.0185
KZA74_10430	537.67	3.15	0.74	4.25	2.13e-05	0.000578			KZA74_10370	122.42	2.19	0.53	4.13	3.63e-05	0.000898
KZA74_10435	777.18	3.04	0.77	3.97	7.34e-05	0.00187			KZA74_10375	250.86	1.56	0.41	3.83	0.000129	0.0029
KZA74_10440	216.66	2.48	0.65	3.83	0.000129	0.00306			KZA74_10385	427.56	2.16	0.57	3.8	0.000142	0.00317
KZA74_10445	827.28	2.79	0.72	3.88	0.000106	0.00256			KZA74_10425	1445.59	4.2	0.74	5.69	1.31e-08	5.77e-07
KZA74_10450	575	2.27	0.65	3.5	0.00046	0.00978			KZA74_10430	1083.63	3.13	0.74	4.21	2.56e-05	0.000651
KZA74_10455	400.07	2.9	0.54	5.34	9.11e-08	3.25e-06			KZA74_10435	1593.65	3.03	0.76	3.97	7.19e-05	0.0017
KZA74_10460	420.74	2.46	0.48	5.17	2.32e-07	7.96e-06			KZA74_10440	431.14	2.46	0.67	3.69	0.000225	0.00477
KZA74_11460	257.07	2.42	0.43	5.61	1.97e-08	8.57e-07			KZA74_10445	1182.24	2.78	0.7	3.99	6.66e-05	0.0016
KZA74_11465	2860.97	3.91	0.81	4.84	1.27e-06	4.12e-05			KZA74_10450	755.57	2.25	0.62	3.61	0.000302	0.00622
KZA74_12630	394.12	3.11	0.49	6.38	1.8e-10	1.51e-08			KZA74_10455	491.97	2.9	0.57	5.06	4.2e-07	1.33e-05
KZA74_12635	329.71	2.75	0.44	6.27	3.63e-10	2.59e-08			KZA74_10460	526.02	2.45	0.52	4.74	2.18e-06	6.23e-05
KZA74_12645	317.03	3.77	0.46	8.11	4.93e-16	3.11e-13			KZA74_11460	1448.13	2.41	0.38	6.28	3.38e-10	2.79e-08
KZA74_12650	857.79	3.49	0.53	6.56	5.5e-11	5.94e-09			KZA74_11465	3428.85	3.92	0.7	5.57	2.5e-08	9.56e-07
KZA74_12655	426.72	2.33	0.6	3.9	9.76e-05	0.0024			KZA74_12630	461.66	3.09	0.55	5.65	1.6e-08	6.84e-07
KZA74_12660	693.09	3.14	0.55	5.73	9.79e-09	4.51e-07			KZA74_12635	450.7	2.75	0.46	5.93	3.08e-09	1.68e-07
KZA74_12665	429.3	3.56	0.6	5.91	3.37e-09	1.72e-07			KZA74_12645	1179.29	3.76	0.48	7.76	8.61e-15	5.25e-12
KZA74_12670	340.93	3.49	0.64	5.48	4.25e-08	1.67e-06			KZA74_12650	1553.1	3.48	0.56	6.16	7.14e-10	5e-08
KZA74_12675	2477.65	3.57	0.62	5.76	8.46e-09	4.01e-07			KZA74_12655	634.5	2.33	0.62	3.75	0.000179	0.00389
KZA74_12680	355.59	3.48	0.5	6.9	5.22e-12	7.89e-10			KZA74_12660	812.89	3.13	0.6	5.2	1.99e-07	6.66e-06
KZA74_12685	549.76	3.7	0.53	6.97	3.07e-12	5.16e-10			KZA74_12665	515.17	3.54	0.63	5.58	2.35e-08	9.18e-07
KZA74_12690	1467.04	3.64	0.6	6.04	1.53e-09	9.17e-08			KZA74_12670	374.41	3.47	0.69	5.04	4.65e-07	1.45e-05
KZA74_12695	849.18	3.82	0.58	6.64	3.23e-11	3.94e-09			KZA74_12675	2862.66	3.56	0.64	5.53	3.16e-08	1.18e-06
KZA74_12700	738.95	3.98	0.58	6.81	9.89e-12	1.38e-09			KZA74_12680	401.84	3.46	0.6	5.82	6.04e-09	2.99e-07
KZA74_12705	3095.16	3.84	0.72	5.33	9.59e-08	3.36e-06			KZA74_12685	667.62	3.68	0.57	6.46	1.07e-10	1.13e-08
KZA74_12710	883.93	2.4	0.54	4.48	7.59e-06	0.000214			KZA74_12690	1772.2	3.63	0.61	5.98	2.27e-09	1.34e-07
KZA74_12715	815.45	4.74	0.72	6.54	6.31e-11	6.63e-09			KZA74_12695	1129.46	3.81	0.59	6.43	1.27e-10	1.31e-08
KZA74_12720	732.82	5.07	0.8	6.33	2.51e-10	1.93e-08			KZA74_12700	955.09	3.96	0.61	6.53	6.41e-11	6.99e-09
KZA74_12725	1705.78	4.61	0.82	5.61	1.97e-08	8.57e-07			KZA74_12705	4034.22	3.84	0.7	5.45	5.08e-08	1.83e-06
KZA74_12730	1194.99	4.61	0.73	6.36	2.08e-10	1.71e-08			KZA74_12710	1320.97	2.4	0.53	4.56	5.19e-06	0.000143
KZA74_12735	1159.64	4.55	0.76	5.98	2.22e-09	1.25e-07			KZA74_12715	1028.72	4.72	0.74	6.39	1.67e-10	1.63e-08
KZA74_12740	414.36	5.4	0.74	7.34	2.1e-13	6.11e-11			KZA74_12720	1130.15	5.06	0.81	6.21	5.19e-10	3.85e-08
KZA74_12745	1108.01	4.98	0.67	7.38	1.63e-13	5.14e-11			KZA74_12725	2460.26	4.6	0.82	5.61	2.06e-08	8.42e-07
KZA74_12750	740.78	4.5	0.76	5.95	2.67e-09	1.45e-07			KZA74_12730	1728.87	4.6	0.76	6.08	1.2e-09	7.56e-08
KZA74_12755	2115.72	4.79	0.7	6.89	5.56e-12	8.08e-10			KZA74_12735	1563.96	4.53	0.77	5.85	4.82e-09	2.48e-07
KZA74_12760	1559.62	4.61	0.65	7.09	1.39e-12	2.91e-10			KZA74_12740	522.31	5.38	0.75	7.17	7.78e-13	1.8e-10
KZA74_12765	2301.72	4.15	0.75	5.55	2.85e-08	1.17e-06			KZA74_12745	1463.67	4.96	0.7	7.08	1.4e-12	2.69e-10
KZA74_12770	238.06	3.79	0.63	6.03	1.64e-09	9.56e-08			KZA74_12750	1093.14	4.49	0.76	5.9	3.69e-09	1.99e-07
KZA74_12775	340.21	4.12	0.44	9.3	1.39e-20	1.74e-17			KZA74_12755	3234.95	4.79	0.71	6.75	1.44e-11	1.91e-09
KZA74_12780	1015.09	3.84	0.65	5.91	3.36e-09	1.72e-07			KZA74_12760	2115.57	4.6	0.68	6.79	1.13e-11	1.55e-09
KZA74_12785	1423.9	3.94	0.65	6.07	1.31e-09	8.13e-08			KZA74_12765	3320.14	4.15	0.74	5.6	2.1e-08	8.48e-07
KZA74_12790	1786.02	3.81	0.63	6.03	1.64e-09	9.56e-08			KZA74_12770	328.1	3.76	0.63	6.01	1.83e-09	1.11e-07
KZA74_12795	559.52	3.78	0.6	6.31	2.79e-10	2.11e-08			KZA74_12775	365.42	4.11	0.44	9.24	2.54e-20	3.14e-17
KZA74_12800	693.22	3.63	0.56	6.51	7.48e-11	7.64e-09			KZA74_12780	1136.72	3.83	0.65	5.89	3.82e-09	2e-07
KZA74_12805	80.68	4.08	0.62	6.59	4.32e-11	4.95e-09			KZA74_12785	1852.96	3.93	0.64	6.1	1.05e-09	6.95e-08
KZA74_12810	63.86	3.45	0.54	6.45	1.12e-10	1.03e-08			KZA74_12790	2165.06	3.8	0.66	5.77	8.11e-09	3.81e-07
KZA74_12815	99.83	3.2	0.49	6.49	8.46e-11	8.41e-09			KZA74_12795	678.26	3.76	0.64	5.89	3.77e-09	2e-07
KZA74_12820	976.37	4.27	0.53	8.11	4.91e-16	3.11e-13			KZA74_12800	836.71	3.62	0.59	6.12	9.2e-10	6.21e-08
KZA74_12825	471.88	3.75	0.6	6.23	4.61e-10	3.11e-08			KZA74_12805	111.16	4	0.65	6.19	5.99e-10	4.27e-08
KZA74_12830	194.27	4.19	0.75	5.58	2.41e-08	1.02e-06			KZA74_12810	81.18	3.36	0.59	5.69	1.25e-08	5.58e-07
KZA74_12835	946.77	4.02	0.66	6.07	1.25e-09	7.87e-08			KZA74_12815	155.61	3.24	0.51	6.37	1.93e-10	1.81e-08
KZA74_12840	548.92	4.3	0.68	6.31	2.87e-10	2.13e-08			KZA74_12820	1448.41	4.26	0.52	8.17	3.12e-16	2.89e-13
KZA74_12845	1248.34	3.69	0.73	5.06	4.26e-07	1.42e-05			KZA74_12825	577.3	3.73	0.64	5.81	6.27e-09	3.02e-07
KZA74_12850	832.11	4.04	0.74	5.45	4.95e-08	1.89e-06			KZA74_12830	225.95	4.15	0.72	5.8	6.68e-09	3.18e-07
KZA74_12855	4271.33	4.11	0.89	4.61	4.08e-06	0.000122			KZA74_12835	1156.81	4.01	0.66	6.08	1.19e-09	7.56e-08
KZA74_12860	454.37	4.12	0.76	5.42	5.91e-08	2.23e-06			KZA74_12840	825.99	4.28	0.68	6.28	3.36e-10	2.79e-08
KZA74_12865	1112.09	4.33	0.81	5.34	9.23e-08	3.26e-06			KZA74_12845	1958.18	3.67	0.71	5.21	1.89e-07	6.49e-06
KZA74_12870	472.87	4.47	0.72	6.17	6.71e-10	4.37e-08			KZA74_12850	1668.69	4.02	0.72	5.61	2.06e-08	8.42e-07
KZA74_12875	412.28	2.78	0.41	6.73	1.65e-11	2.22e-09			KZA74_12855	5756.31	4.1	0.85	4.81	1.54e-06	4.54e-05
KZA74_12880	299.67	3.08	0.72	4.28	1.87e-05	0.000517			KZA74_12860	776.32	4.08	0.75	5.47	4.6e-08	1.67e-06
KZA74_12885	331.36	3.46	0.77	4.5	6.66e-06	0.000192			KZA74_12865	1768.51	4.31	0.76	5.64	1.72e-08	7.17e-07
KZA74_12890	1044.91	3.58	0.68	5.23	1.68e-07	5.83e-06			KZA74_12870	848.15	4.45	0.71	6.26	3.95e-10	3.12e-08
KZA74_12895	1177.44	3.73	0.65	5.72	1.07e-08	4.79e-07			KZA74_12875	521.87	2.77	0.4	6.91	4.73e-12	7.64e-10
KZA74_12900	124.44	3.34	0.72	4.66	3.13e-06	9.54e-05			KZA74_12880	1014.99	3.04	0.68	4.45	8.49e-06	0.000227
KZA74_12905	94.23	3.78	0.67	5.61	2.04e-08	8.78e-07			KZA74_12885	707.15	3.43	0.72	4.76	1.92e-06	5.57e-05
KZA74_12910	166.49	3.46	0.58	5.94	2.87e-09	1.53e-07			KZA74_12890	2259.28	3.56	0.67	5.32	1.05e-07	3.68e-06
KZA74_12915	250.2	3.78	0.65	5.84	5.37e-09	2.67e-07			KZA74_12895	3103.52	3.72	0.65	5.71	1.13e-08	5.18e-07
KZA74_12920	388.94	3.68	0.52	7.04	1.94e-12	3.56e-10			KZA74_12900	272.55	3.28	0.69	4.74	2.13e-06	6.12e-05
KZA74_16400	35355	6.26	1.36	4.6	4.15e-06	0.000123			KZA74_12905	238.79	3.67	0.63	5.82	5.94e-09	2.98e-07
KZA74_17685	198.73	0.53	0.18	3.02	0.00249	0.0438			KZA74_12910	283.5	3.41	0.55	6.14	8.11e-10	5.57e-08
KZA74_18775	78.64	0.78	0.26	3.03	0.00248	0.0438			KZA74_12915	389.97	3.73	0.62	6	2.02e-09	1.21e-07
KZA74_18810	104.59	1.03	0.27	3.75	0.000179	0.00414			KZA74_12920	630.05	3.65	0.51	7.14	9.02e-13	1.91e-10
KZA74_18970	639.97	3.33	0.58	5.73	1.02e-08	4.62e-07			KZA74_16395	437.19	1.43	0.43	3.3	0.000958	0.0184
KZA74_18975	710.16	2.08	0.44	4.77	1.84e-06	5.86e-05			KZA74_16400	51745.2	6.25	1.2	5.21	1.92e-07	6.54e-06
									KZA74_18775	107.93	0.82	0.25	3.28	0.00102	0.0195
									KZA74_18970	1377.33	3.34	0.54	6.2	5.62e-10	4.09e-08
									KZA74_18975	1389.31	2.08	0.41	5.11	3.17e-07	1.03e-05
