# Supplementary material for: DNA damage response coregulator ddrR affects many cellular pathways and processes in Acinetobacter baumannii 17978
Source: Front Cell Infect Microbiol. 2024 Jan 11;13:1324091. doi: 10.3389/fcimb.2023.1324091 (PMC10808703; doi:10.3389/fcimb.2023.1324091)
Supplement: Supplementary file 7 [file Table_6.xlsx]

## Sheet: All induced by strains
											Basal Expression Differences Mutant vs WT							DNA Damage Response Expression Differences MMC treated vs Untreated
Induced in Strains	ENSEMBL GENE	location bp	size	direction	ENSEMBL GENE	gene	17978-mff RefSeq locus	AB5075-UW ortholog	ATCC 17978 ID	17978 UN ID	Basal base Mean	recA vs WT log(2)FC	umuDAb l2FC	ddrR l2FC	rcA padj	umuDAb padj	ddrR padj	MMC base Mean	WT log2FC	umuDAb log2FC	ddrR log2FC	WT padj	umuDAb padj	padj
ddrR	KZA74_00040	9774..10,778	1005	=>	RND transporter	NA	ACX60_RS00040	ABUW_0008	A1S_0008	KZA74_00040	372.407	0.273393	0.322347	-2.05589	0.973209	0.873284	2.75426e-07	374.514	0.677873	0.375882	1.21645	0.420753	0.787509	0.0247002
ddrR	KZA74_00060	13,904..14,749	846	<=	ephA, alpha/beta hydrolase	ephA	ACX60_RS00060	ABUW_0012	A1S_0012	KZA74_00060	218.272	0.078235	0.0263775	-0.987055	0.980598	0.996962	0.000241338	220.001	0.418171	0.55551	1.0134	0.311759	0.125612	2.28873e-05
ddrR	KZA74_00270	58,954..59,412	459	=>	flagellin N-methylase	K09160	ACX60_RS00265	ABUW_0054	A1S_3429	KZA74_00270	285.863	0.0592271	0.0194335	-1.11614	0.9888	0.996962	0.0066463	308.931	0.471308	0.734517	1.4013	0.566412	0.221042	0.000372736
ddrR	KZA74_00275	59,522..60,694	1173	=>	yliI, PQQ-dependent sugar dehydrogenase	yliI	ACX60_RS00270	ABUW_0055	A1S_3428	KZA74_00275	629.604	0.0799268	-0.081734	-1.77657	0.986689	0.990942	1.92288e-08	628.579	0.429023	0.548019	1.44013	0.584757	0.397413	6.24563e-05
ddrR	KZA74_00280	60,800..62,065	1266	=>	rarA, replication-associated recombination protein A	ycaJ	ACX60_RS00275	ABUW_0056	A1S_3427	KZA74_00280	939.345	0.176011	-0.0930662	-0.220818	0.973209	0.94956	0.258229	887.066	0.285256	0.465448	0.746036	0.568113	0.194959	0.0027334
ddrR	KZA74_00285	62,081..62,920	840	<=	yfdC, formate/nitrite transporter family protein	yfdC	ACX60_RS00280	ABUW_0057	A1S_3426	KZA74_00285	353.67	0.0357461	0.202788	-2.04513	0.991879	0.953069	7.68511e-07	333.46	0.522857	0.0361265	1.12405	0.576171	0.98499	0.0299211
ddrR	KZA74_00315	66,898..67,836	939	=>	panS, bile acid:sodium symporter family protein	TC.BASS	ACX60_RS00310	ABUW_0063	A1S_3421	KZA74_00315	539.77	-0.233171	-0.0637805	-1.35483	0.973209	0.996962	3.79125e-05	526.73	0.397158	0.543546	0.798768	0.521775	0.273588	0.0270711
ddrR	KZA74_00435	95,806..96,090	285	=>	KZA74_00435	NA	ACX60_RS00430	NA	NA	KZA74_00435	30.5357	-0.628707	0.180745	-2.90318	0.973209	0.990942	7.46812e-05	29.2533	0.191093	-0.153575	2.43604	NA	0.952925	0.00186303
ddrR	KZA74_00450	99,561..100,076	516	<=	pgpA, phosphatidylglycerophosphatase A	pgpA	ACX60_RS00450	ABUW_0091	A1S_3392	KZA74_00450	536.84	0.491612	0.371646	1.11967	0.463457	0.837046	1.02012e-07	506.056	0.397119	0.380323	0.600255	0.348226	0.389931	0.0342169
ddrR	KZA74_00545	118,065..118,898	834	=>	sadH, SDR family NAD(P)-dependent oxidoreductase	sadH	ACX60_RS00545	ABUW_0108	A1S_3372	KZA74_00545	547.756	0.476997	0.188924	-0.665939	0.43844	0.839664	0.00155423	541.875	0.37718	0.646173	0.715917	0.509097	0.104066	0.0325686
ddrR	KZA74_00620	136,055..137,398	1344	<=	GPI inositol-deacylase	GPI	ACX60_RS00640	ABUW_0122	A1S_3361	KZA74_00620	657.509	0.120542	0.0856115	-0.709517	0.977761	0.991179	0.0448868	678.288	0.499639	0.461636	1.29937	0.462166	0.534342	0.000332489
ddrR	KZA74_00805	176,078..176,653	576	=>	mneA, TMEM165/GDT1 family protein	mneA	ACX60_RS00825	ABUW_0158	A1S_3326	KZA74_00805	618.229	0.148872	-0.0353428	0.479412	0.973209	0.996962	0.0212073	658.656	0.135598	0.733957	1.1784	0.930439	0.181364	0.00218904
ddrR	KZA74_01210	258,962..260,041	1080	=>	DNA/RNA non-specific endonuclease	ENDOG	ACX60_RS01225	ABUW_0234	A1S_3252	KZA74_01210	355.956	-0.18668	-0.0337566	-0.996444	0.97575	0.996962	0.0441183	338.146	0.287818	0.256944	1.08412	0.83851	0.860255	0.0411127
ddrR	KZA74_01395	291,838..293,253	1416	=>	czcC, Cobalt-zinc-cadmium resistance protein	czcC	ACX60_RS01405	ABUW_0266	A1S_3219	KZA74_01395	554.032	-0.28374	-0.254486	-2.92434	0.973209	0.946923	2.05798e-09	499.558	0.112459	0.339059	1.30626	0.97464	0.830886	0.0269037
ddrR	KZA74_01915	402,985..404,085	1101	=>	HPP family membrane protein	HPP, K07168	ACX60_RS01920	ABUW_0371	A1S_3114	KZA74_01915	401.064	0.137468	0.282561	-1.69913	0.977802	0.890187	1.32976e-05	421.756	0.238711	0.307161	2.50161	0.839724	0.787509	1.00846e-13
ddrR	ruvB	972,195..973,199	1005	<=	ruvB, Holliday junction branch migration DNA helicaseRuvB	ruvB	ACX60_RS04620	ABUW_0999	A1S_2588	KZA74_04645	814.131	0.524439	-0.208831	-0.108603	0.973209	0.95893	0.836978	1076.61	0.289158	1.23522	2.26304	0.896291	0.13948	9.06607e-05
ddrR	adeH	1,296,418..1,297,866	1449	<=	adeH, multidrug efflux RND transporter outer membranesubunit AdeH	adeH	ACX60_RS06010	ABUW_1334	A1S_2306	KZA74_06040	473.181	-0.599498	-0.223783	-2.47422	0.973209	0.977085	9.46712e-05	429.918	-0.162392	-0.212535	2.17178	0.963548	0.925644	0.000590159
ddrR	adeG	1,297,879..1,301,058	3180	<=	adeG, multidrug efflux RND transporter permeasesubunit AdeG	adeG	ACX60_RS06015	ABUW_1335	A1S_2305	KZA74_06045	1156.86	-0.432822	-0.120395	-3.01012	0.973209	0.996962	1.78594e-05	1056.82	-0.0714592	-0.423326	2.87042	0.988408	0.856134	3.30675e-05
ddrR	adeF	1,301,065..1,302,282	1218	<=	adeF, multidrug efflux RND transporter periplasmicadaptor subunit AdeF	adeF	ACX60_RS06020	ABUW_1336	A1S_2304	KZA74_06050	480.134	-0.376548	-0.0357329	-3.96114	0.973457	0.996962	5.43975e-08	437.457	0.0253339	-0.620497	3.78193	0.996558	0.78002	5.58925e-08
ddrR	KZA74_06860	1,462,184..1,463,827	1644	=>	AMP-binding protein	ACSS, acs	ACX60_RS06830	ABUW_1574	A1S_2148	KZA74_06860	910.322	-0.221382	-0.428805	-3.75392	0.97575	0.883051	3.28344e-11	814.88	-0.667004	0.368681	2.44506	0.801108	0.901624	0.0201991
ddrR	KZA74_07270	1,555,236..1,555,397	162	=>	KZA74_07270	NA	NA	NA	NA	KZA74_07270	44.1396	0.473244	0.034043	-1.30832	0.973209	0.996962	0.00560745	59.1656	1.12994	0.861256	2.95501	0.365588	0.597306	2.46597e-05
ddrR	mgtA	1,555,498..1,558,254	2757	=>	mgtA, magnesium-translocating P-type ATPase	mgtA, mgtB	ACX60_RS07240	ABUW_1666	A1S_2070	KZA74_07275	714.458	0.316726	0.180163	-2.76564	0.973209	0.98051	1.61602e-07	889.761	0.953058	1.11714	3.02817	0.511757	0.371756	2.14717e-05
ddrR	KZA74_07280	1,558,270..1,558,989	720	=>	MgtC/SapB family protein	mgtC	ACX60_RS07245	NA	A1S_2069	KZA74_07280	200.18	0.38777	0.146338	-1.71048	0.973209	0.976892	2.68099e-05	229.722	0.685248	0.93625	2.01292	0.609969	0.368506	0.00145272
ddrR	KZA74_07285	1,559,063..1,560,235	1173	<=	benzoate/H(+) symporter BenE family transporter	benE	ACX60_RS07250	ABUW_1668	A1S_2068	KZA74_07285	277.493	-0.144816	0.0617855	-2.25011	0.986689	0.996962	0.000108557	277.043	0.559091	0.0898561	1.8782	0.722853	0.968002	0.00536915
ddrR	KZA74_07675	1,624,033..1,624,215	183	=>	type II toxin-antitoxin system HicA familytoxin	hicA	ACX60_RS07640	NA	NA	KZA74_07675	156.431	1.28018	0.102659	0.962821	0.931059	0.996962	0.222829	486.343	2.72337	2.81022	3.37902	0.0798738	0.0659247	0.00804492
ddrR	KZA74_08040	1,694,464..1,694,946	483	<=	recombination regulator RecX	recX	ACX60_RS07980	ABUW_1747	A1S_1963	KZA74_08040	195.609	0.220613	0.116522	-0.224496	0.973209	0.986002	0.586851	271.52	0.649303	0.838923	2.39972	0.254805	0.0869655	1.14742e-14
ddrR	KZA74_09110	1,918,298..1,918,813	516	=>	KZA74_09110	NA	ACX60_RS09055	NA	A1S_3726	KZA74_09110	35.7543	0.345001	0.898808	-4.55744	0.973209	0.837046	7.98947e-09	32.3817	0.55164	-0.242947	2.32467	NA	0.927709	0.031971
ddrR	KZA74_09115	1,918,961..1,919,479	519	=>	GNAT family N-acetyltransferase	ttr	ACX60_RS09060	ABUW_1964	A1S_1761	KZA74_09115	165.783	0.196451	0.0240301	0.524767	0.973209	0.996962	0.1491	164.455	-0.240783	0.300716	1.23834	0.850523	0.818109	0.00223556
ddrR	KZA74_09420	1,983,318..1,984,376	1059	=>	AraC family transcriptional regulator	NA	ACX60_RS09155	ABUW_2084	A1S_1746	KZA74_09420	279.949	0.345485	0.437699	-1.31386	0.973209	0.839664	0.00804508	306.308	0.430144	0.429695	2.34654	0.803237	0.821306	6.25698e-05
ddrR	KZA74_09640	2,029,631..2,030,902	1272	=>	sigma-54 dependent transcriptional regulator	fisR	ACX60_RS09375	ABUW_2124	A1S_1707	KZA74_09640	341.567	-0.0362783	0.139415	-0.6976	0.991879	0.98049	0.104744	318.428	0.0144423	0.050425	1.26354	0.996558	0.975434	0.00568025
ddrR	KZA74_10380	2,175,865..2,176,581	717	<=	KZA74_10380	NA	ACX60_RS10115	NA	A1S_3689	KZA74_10380	482.528	-1.13505	-0.504482	0.336342	0.455376	0.837046	0.541032	638.76	0.553197	1.12175	1.74256	0.686592	0.181611	0.00387562
ddrR	KZA74_10390	2,177,169..2,177,339	171	<=	KZA74_10390	NA	ACX60_RS10125	ABUW_0752|ABUW_1271	NA	KZA74_10390	30.5745	-0.0371507	-0.157282	-6.37418	0.992114	0.994753	1.92583e-08	53.2108	1.3637	2.37694	5.64382	0.458703	0.0633951	2.42603e-05
ddrR	KZA74_10395	2,177,336..2,177,938	603	<=	KZA74_10395	NA	ACX60_RS10130	NA	NA	KZA74_10395	183.325	-0.033547	0.0396193	-7.60279	0.992114	0.996962	2.34422e-18	325.714	1.21554	2.31742	7.84062	0.573532	0.0909193	2.55673e-13
ddrR	KZA74_10400	2,177,935..2,178,213	279	<=	KZA74_10400	NA	ACX60_RS10135	NA	A1S_1585	KZA74_10400	63.0015	0.295645	0.515518	-6.17799	0.97575	0.885255	4.99396e-11	98.7918	1.3208	1.47658	7.24992	0.280345	0.188869	3.20717e-15
ddrR	KZA74_11230	ND	ND	ND	cydB, cytochrome d ubiquinol oxidase subunit II	cydB	ACX60_RS10960	ABUW_2390	A1S_1433	KZA74_11230	766.213	-0.0146145	-0.499692	-1.73939	0.992114	0.837046	7.68887e-10	683.468	-0.624671	0.252903	1.12482	0.500836	0.875368	0.0489706
ddrR	KZA74_11350	2,362,020..2,362,940	921	<=	LysR family transcriptional regulator	NA	ACX60_RS11080	ABUW_2412	A1S_1410	KZA74_11350	312.819	0.22226	0.0700002	-2.31978	0.973209	0.996962	4.50668e-08	285.394	-0.0384543	0.0212138	1.15552	0.990942	0.989046	0.0291827
ddrR	KZA74_13010	2,700,330..2,701,343	1014	<=	AraC family transcriptional regulator	NA	ACX60_RS12730	ABUW_2766	A1S_1124	KZA74_13010	405.566	-0.233912	-0.123631	-2.83707	0.974056	0.990942	5.42186e-10	391.083	0.571541	0.108739	1.61277	0.635038	0.952925	0.00507687
ddrR	KZA74_14110	2,957,328..2,957,612	285	=>	KZA74_14110	NA	ACX60_RS13805	ABUW_2992	A1S_3576	KZA74_14110	73.1848	-0.628521	-0.0192295	-4.20422	0.973209	0.997921	1.05076e-07	57.5108	-0.110156	-0.767799	2.11557	0.986515	0.734855	0.0330875
ddrR	KZA74_15615	3,274,942..3,275,349	408	=>	RidA family protein	ridA	ACX60_RS15295	ABUW_3316	A1S_0564	KZA74_15615	76.2181	0.612965	0.659894	-2.19643	0.973209	0.837046	1.20922e-06	72.7775	0.475514	0.131585	1.9048	0.661481	0.937048	3.02328e-05
ddrR	uvrC	3,549,469..3,551,268	1800	<=	uvrC, excinuclease ABC subunit UvrC	uvrC	ACX60_RS16540	ABUW_3568	A1S_0310	KZA74_16870	1308.5	0.201134	-0.130769	0.357713	0.973209	0.95893	0.245962	1446.07	0.301158	0.626598	1.48573	0.701098	0.183577	5.07677e-07
ddrR	KZA74_17400	3,661,167..3,662,045	879	=>	dihydrodipicolinate synthase family protein	dapA	ACX60_RS17065	ABUW_3682	A1S_0203	KZA74_17400	327.136	-0.0619644	-0.00823895	-1.158	0.988413	0.997921	0.000142116	315.718	0.245259	0.393095	0.993161	0.797129	0.590811	0.00490323
ddrR	KZA74_17565	3,697,656..3,697,862	207	<=	KZA74_17565	NA	ACX60_RS17230	ABUW_3718	A1S_0171	KZA74_17565	118.68	0.625271	0.512383	-0.802001	0.870139	0.837046	0.0234796	113.193	0.495156	0.241907	0.903216	0.516932	0.85092	0.0452778
ddrR	KZA74_17570	3,697,916..3,699,991	2076	<=	TonB-dependent copper receptor	TC.FEV.OM	ACX60_RS17235	ABUW_3719	A1S_0170	KZA74_17570	775.412	-0.0427334	0.0498392	-1.64355	0.991879	0.996962	0.000333571	731.509	0.403882	0.0849811	1.33969	0.756823	0.963403	0.0155863
ddrR	KZA74_17700	3,720,781..3,721,407	627	<=	LysE family transporter	rhtB	ACX60_RS17365	ABUW_3744	A1S_0142	KZA74_17700	351.467	0.318258	0.191541	-0.323716	0.973209	0.839664	0.140777	332.239	0.423658	0.307242	0.724981	0.198505	0.477377	0.000823389
ddrR	KZA74_18010	3,790,338..3,790,622	285	=>	KZA74_18010	NA	NA	NA	AS1_3486	KZA74_18010	59.3789	-0.305557	0.28514	-2.58209	0.97575	0.979374	0.00264092	62.7374	0.650737	0.0762384	2.37465	0.752785	0.981211	0.00495407
ddrR	KZA74_18315	3,855,936..3,856,502	567	<=	5'-nucleosidase	mtnN, mtn, pfs	ACX60_RS17960	ABUW_3859	A1S_0024	KZA74_18315	310.798	0.0975852	-0.00042992	-0.404461	0.978617	1	0.189758	307.487	0.495461	0.450239	0.838874	0.268748	0.356555	0.00442873
ddrR	KZA74_18450	3,884,223..3,884,585	363	<=	DMT family protein	K09922	ACX60_RS18095	ABUW_3887	A1S_2965	KZA74_18450	219.823	0.475226	0.101136	0.729535	0.973209	0.979284	0.0125724	238.192	0.431546	0.835425	1.0244	0.545224	0.0732903	0.00426257
ddrR	KZA74_18460	3,886,271..3,887,521	1251	<=	ltrA, low temperature requirement protein A	ltrA	ACX60_RS18105	ABUW_3889	A1S_3870	KZA74_18460	773.443	-0.153099	-0.208212	-0.474223	0.973209	0.837894	0.0370371	756.957	0.319408	0.6374	0.711299	0.553662	0.0659945	0.0149256
ddrR	KZA74_18470	3,888,571..3,889,527	957	=>	TerC family protein	terC	ACX60_RS18115	ABUW_3891	A1S_2969	KZA74_18470	547.145	0.218173	-0.06471	0.150111	0.973209	0.996962	0.694745	588.679	0.570304	0.573505	1.19367	0.310066	0.306152	0.000511612
ddrR	KZA74_18480	3,890,103..3,891,263	1161	=>	gspSA, glutathionylspermidine synthase family protein	gRPE, gspSA, ygiC	ACX60_RS18125	ABUW_3893	A1S_2970	KZA74_18480	456.7	-0.125695	-0.0741215	-1.38141	0.97575	0.993335	5.03165e-05	488.665	0.519167	0.84806	1.22792	0.48934	0.11791	0.00288938
ddrR	KZA74_18505	3,895,208..3,895,906	699	<=	DsbC family protein	dsbC	ACX60_RS18155	ABUW_3899	A1S_2976	KZA74_18505	224.571	0.643315	0.440132	0.780753	0.713647	0.837046	0.0170805	238.089	0.698303	0.760878	1.01742	0.159806	0.110071	0.00377802
ddrR	dmeF	3,896,002..3,896,982	981	<=	dmeF, CDF family Co(II)/Ni(II) efflux transporterDmeF	dmeF	ACX60_RS18160	ABUW_3900	A1S_2977	KZA74_18510	303.45	0.19717	0.613957	-2.50976	0.97575	0.837046	1.72653e-06	293.993	0.65632	0.0750056	1.65855	0.519649	0.967019	0.00245923
ddrR	KZA74_18515	3,897,040..3,897,303	264	=>	metal/formaldehyde-sensitive transcriptionalrepressor	NA	ACX60_RS18165	ABUW_3901	A1S_2978	KZA74_18515	150.928	0.329178	0.173649	0.975134	0.973209	0.967563	0.0181196	150.118	0.00541049	0.815883	0.899628	0.999632	0.131833	0.031971
ddrR	KZA74_18810	45,106..45,213	108	<=	KZA74_18810	NA	NA	NA	A1S_3511	KZA74_18810	151.427	1.01864	0.604082	1.61037	0.69945	0.837046	0.00169421	181.451	1.02405	0.892259	1.12949	0.149776	0.246411	0.0497434
ddrR	repM	1..951	951	=>	repM	NA	NA	NA	NA	KZA74_19385	1517.78	0.467525	0.591985	-0.72851	0.973209	0.837046	0.101031	1631.2	0.055441	0.157991	1.47467	0.986515	0.931477	0.00447768
ddrR umuDAb	KZA74_00625	137,610..138,191	582	=>	esterase	K07000	ACX60_RS00645	ABUW_0123	A1S_3360	KZA74_00625	450.871	1.37414	0.0639966	-0.0291871	0.0137138	0.996962	0.947556	822.654	1.33734	2.46003	2.92537	0.0698817	7.42593e-06	1.09362e-08
ddrR umuDAb	parE	138,206..140,089	1884	=>	parE , DNA topoisomerase IV subunit B	parE	ACX60_RS00650	ABUW_0124	A1S_3359	KZA74_00630	2280.24	1.42554	-0.234191	-0.306667	0.226001	0.966855	0.6168	3974.89	0.98608	2.61567	3.18176	0.48329	0.000627578	5.8092e-06
ddrR umuDAb	uvrA	213,503..216,337	2835	<=	uvrA, excinuclease ABC subunit UvrA	uvrA	ACX60_RS00975	ABUW_0189	A1S_3295	KZA74_00955	4697.04	0.952747	-0.389918	0.824924	0.96971	0.903339	0.168948	9310.04	1.13527	2.7112	2.70936	0.438388	0.00132734	0.00092432
ddrR umuDAb	ssb	222,661..223,242	582	=>	ssb, single-stranded DNA-binding protein	ssb	ACX60_RS01015	ABUW_0197|ABUW_0542	A1S_3287	KZA74_00995	3735.1	1.68557	-0.684281	0.463556	0.578762	0.853057	0.605388	6988.48	1.09914	3.41601	2.72218	0.627591	0.00124871	0.01598
ddrR umuDAb	KZA74_01905	400,790..402,052	1263	=>	DNA repair, radical SAM protein	SAM	ACX60_RS01910	ABUW_0369	A1S_3116	KZA74_01905	1029.62	2.05875	0.110829	-0.244404	0.00439416	0.994753	0.681941	2099.64	1.45228	2.72482	3.97142	0.141368	8.95595e-05	2.02409e-10
ddrR umuDAb	KZA74_01910	402,055..402,852	798	=>	TIGR03915 family putative DNA repair protein	NA	ACX60_RS01915	ABUW_0370	A1S_3115	KZA74_01910	335.188	1.42737	0.45516	-0.35562	0.101979	0.837894	0.50183	638.223	1.2583	1.79489	3.82318	0.0836988	0.0021754	1.05754e-15
ddrR umuDAb	ruvA	973,208..973,807	600	<=	ruvA, Holliday junction branch migration protein RuvA	ruvA	ACX60_RS04625	ABUW_1000	A1S_2587	KZA74_04650	528.087	0.954014	-0.127289	-0.263759	0.101979	0.974825	0.451096	689.607	0.189161	1.19495	2.48496	0.906555	0.0191645	9.62051e-11
ddrR umuDAb	KZA74_04655	973,899..975,239	1341	<=	dGTPase, deoxyguanosinetriphosphate triphosphohydrolase	dgt	ACX60_RS04630	ABUW_1001	A1S_2586	KZA74_04655	865.08	1.29232	0.026158	1.20671	0.132133	0.996962	0.00921264	1728.39	0.462323	1.52448	3.04769	0.777321	0.0375764	1.64269e-08
ddrR umuDAb	KZA74_07370	1,580,202..1,580,705	504	=>	low molecular weight phosphotyrosine protein phosphatase	yfkJ, E3.1.3.48	ACX60_RS07335	ABUW_1686	A1S_2051	KZA74_07370	247.72	0.148483	0.0152916	0.994921	0.973209	0.996962	3.62178e-05	279.232	0.318548	1.12819	1.03054	0.801108	0.0389408	0.042332
ddrR umuDAb	murB	1,580,725..1,581,759	1035	=>	murB, UDP-N-acetylmuramate dehydrogenase	murB	ACX60_RS07340	ABUW_1687	A1S_2050	KZA74_07375	421.907	0.0996865	0.0805389	0.367572	0.97575	0.975945	0.0910106	460.372	0.586526	0.921846	0.945849	0.332026	0.0464696	0.021149
ddrR umuDAb	recA	1,695,000..1,696,049	1050	<=	recA, recombinase RecA	recA	ACX60_RS07985	ABUW_1748	A1S_1962	KZA74_08045	15490.7	2.91536	-0.585877	1.62348	0.174334	0.94447	0.151464	41447.9	2.25231	4.42282	3.48118	0.26523	0.00091899	0.0152397
ddrR umuDAb	KZA74_09100	1,916,536..1,917,156	621	=>	KZA74_09100	NA	ACX60_RS09045	NA	A1S_3727	KZA74_09100	738.739	0.810437	-0.660856	1.31577	0.973209	0.839664	0.0856086	1337.53	0.575419	2.49163	2.38542	0.808594	0.00781456	0.00837738
ddrR umuDAb	KZA74_09105	1,917,174..1,918,256	1083	=>	ImmA/IrrE family metallo-endopeptidase	NA	ACX60_RS09050	NA	A1S_1762	KZA74_09105	1719.16	0.608017	-0.74046	0.965008	0.973209	0.837046	0.210046	3176.45	0.772285	2.86792	2.31999	0.741695	0.00340124	0.0251761
ddrR umuDAb	KZA74_10140	2,131,806..2,132,465	660	<=	SRAP, SOS response-associated peptidase	SRAP	ACX60_RS09875	ABUW_2220	A1S_1614	KZA74_10140	608.265	1.39477	-0.188584	-0.0476718	0.173377	0.97666	0.93495	1015.14	0.87403	2.09456	2.96263	0.540442	0.00899975	1.18259e-05
ddrR umuDAb	KZA74_10320	2,169,952..2,171,652	1701	<=	terminase large subunit	NA	ACX60_RS10055	NA	A1S_1587	KZA74_10320	421.867	-0.288534	-0.0558958	-6.21743	0.97575	0.996962	1.19909e-17	1192.21	1.97996	2.46025	8.81423	0.0694214	0.00925426	7.17333e-32
ddrR umuDAb	KZA74_10405	2,178,210..2,179,542	1333	<=	AAA family ATPase, frameshifted	NA	ACX60_RS10140	NA	A1S_1584	KZA74_10405	268.133	-0.544671	-0.054304	-5.8928	0.973209	0.996962	4.57181e-16	653.492	1.40827	2.62429	7.65323	0.322012	0.00673668	2.11022e-22
ddrR umuDAb	KZA74_10410	2,179,542..2,180,426	885	<=	YdaU family protein	NA	ACX60_RS10145	NA	A1S_1583	KZA74_10410	199.625	-0.0447822	0.467838	-5.66253	0.991879	0.885744	2.09507e-16	558.775	1.49356	2.28117	8.80886	0.227439	0.0143175	4.6049e-32
ddrR umuDAb	KZA74_10415	2,180,426..2,180,722	297	<=	KZA74_10415	NA	ACX60_RS10150	NA	NA	KZA74_10415	57.3318	-0.48903	-0.141101	-7.08543	0.973209	0.996962	1.68248e-11	247.992	1.82131	3.27984	10.5839	0.141981	0.000212871	4.57805e-23
ddrR umuDAb	KZA74_10420	2,181,094..2,181,759	666	=>	helix-turn-helix domain-containing protein	NA	ACX60_RS10155	NA	A1S_3687	KZA74_10420	414.46	0.113967	-0.382437	-0.17713	0.978617	0.837046	0.633461	514.534	-0.546112	1.98436	1.42237	0.683384	0.000579527	0.0259075
ddrR umuDAb	KZA74_10465	2,185,341..2,186,300	960	<=	tyrosine-type recombinase/integrase	xerC	ACX60_RS10195	NA	A1S_1580	KZA74_10465	186.958	-0.3718	-0.013376	-1.0852	0.973209	0.997921	0.0233702	315.941	1.00303	1.455	3.19822	0.230128	0.0267753	3.72091e-11
ddrR umuDAb	KZA74_12350	2,580,269..2,580,814	546	<=	N-acetylmuramidase	NA	ACX60_RS12065	ABUW_2693	A1S_1226	KZA74_12350	138.782	-0.0490511	0.120721	-1.92827	0.989848	0.982425	1.6653e-07	689.863	1.56913	4.48914	4.83193	0.275279	1.37242e-07	3.49348e-09
ddrR umuDAb	KZA74_12355	2,580,852..2,581,241	390	<=	KZA74_12355	NA	ACX60_RS12070	ABUW_2694	A1S_3630	KZA74_12355	124.727	0.357794	0.426953	-2.47922	0.973209	0.839835	2.9645e-07	539.566	1.50586	4.1487	5.40885	0.307541	1.75122e-06	3.0827e-11
ddrR umuDAb	KZA74_12360	2,581,805..2,582,476	672	=>	helix-turn-helix domain-containing protein	NA	ACX60_RS12075	ABUW_2695	A1S_1225	KZA74_12360	266.965	0.59124	0.229196	0.422817	0.63421	0.873284	0.158439	636.786	1.47449	2.80154	3.04114	0.112667	2.39582e-05	1.37568e-06
ddrR umuDAb	parC	3,668,774..3,670,993	2220	<=	parC, DNA topoisomerase IV subunit A	parC	ACX60_RS17100	ABUW_3690	A1S_0194	KZA74_17435	2088.15	0.419249	-0.397191	0.217545	0.973209	0.837046	0.578504	2542.97	0.333885	1.45058	1.6941	0.811458	0.00823063	0.000561809
ddrR umuDAb	KZA74_18475	3,889,716..3,890,081	366	=>	KZA74_18475	NA	ACX60_RS18120	ABUW_3892	A1S_3871	KZA74_18475	165.359	0.494406	0.19181	-0.555756	0.870139	0.893705	0.0443999	184.239	0.685657	0.828046	0.944183	0.111889	0.0340382	0.00335022
ddrR umuDAb	KZA74_19055	100,613..101,083	471	<=	integrase	NA	NA	NA	A1S_3536	KZA74_19055	839.576	1.1559	-0.249055	-1.17044	0.578762	0.95893	0.0401797	1202.88	1.14293	1.882	2.40024	0.283175	0.0150821	0.000322515
umuDAb	KZA74_00065	14,877..16,004	1128	<=	anmK, anhydro-N-acetylmuramic acid kinase	anmK	ACX60_RS00065	ABUW_0013	A1S_0013	KZA74_00065	1212.47	-0.259125	-0.5407	0.359215	0.973209	0.837046	0.241945	1171.61	0.101273	1.00936	0.522784	0.963548	0.0421584	0.43342
umuDAb	tyrS	16,066..17,298	1233	=>	tyrS, tyrosine--tRNA ligase	YARS, tyrS	ACX60_RS00070	ABUW_0014	A1S_0014	KZA74_00070	952.371	0.246168	-0.259723	1.18282	0.973209	0.837046	1.764e-06	971.126	0.255859	1.20433	0.588562	0.803721	0.00188661	0.258545
umuDAb	KZA74_00100	23,686..24,285	600	=>	yfcG, glutathione S-transferase family protein	GST, gst	ACX60_RS00100	ABUW_0020	A1S_3460	KZA74_00100	231.451	0.202526	0.239941	0.30849	0.973209	0.874715	0.338379	233.906	0.425561	0.777973	0.606236	0.42117	0.0316023	0.0870008
umuDAb	ilvD	29,954..31,783	1830	=>	ilvD, dihydroxy-acid dehydratase	ilvD	ACX60_RS00130	ABUW_0026	A1S_3455	KZA74_00130	2480.72	0.059001	-0.601134	0.043336	0.9888	0.837046	0.926216	2615.23	0.290361	1.47107	0.788278	0.881694	0.0298197	0.374378
umuDAb	aceE	170,700..173,417	2718	=>	aceE, pyruvate dehydrogenase (acetyl-transferring),homodimeric type	aceE	ACX60_RS00810	ABUW_0155	A1S_3328	KZA74_00790	10335.2	-0.822947	-1.35197	0.484798	0.973209	0.837046	0.597236	12822.1	0.0950172	2.63239	0.934308	0.990942	0.0493106	0.685811
umuDAb	guaB	180,487..181,953	1467	=>	guaB, IMP dehydrogenase	IMPDH, guaB	ACX60_RS00845	ABUW_0162	A1S_3321	KZA74_00825	4493.57	0.165402	-0.640378	1.2475	0.978912	0.837046	0.0266798	4839.08	0.0946054	1.92633	0.664431	0.986515	0.0357152	0.681182
umuDAb	KZA74_00860	188,639..189,697	1059	=>	nemA, alkene reductase	nemA	ACX60_RS00880	ABUW_0170	A1S_3314	KZA74_00860	661.611	-0.0646268	-0.270385	-0.0886288	0.986689	0.837046	0.76082	621.351	0.165104	0.702679	0.384449	0.841786	0.0356802	0.350429
umuDAb	KZA74_00985	220,016..221,098	1083	=>	KZA74_00985	K09799	ACX60_RS01005	ABUW_0195	A1S_3289	KZA74_00985	973.912	-0.0801029	-0.434354	0.293031	0.980598	0.837046	0.327213	1077.56	0.292218	1.6118	0.739572	0.876935	0.0105556	0.422459
umuDAb	rimM	352,600..353,148	549	=>	rimM, ribosome maturation factor RimM	rimM	ACX60_RS01680	ABUW_0321	A1S_3163	KZA74_01675	8729.88	0.202031	-1.38259	1.88842	0.987173	0.837046	0.0403999	8295.98	-0.407715	2.78566	-0.00046049	0.930485	0.0495377	1
umuDAb	trmD	353,194..353,934	741	=>	trmD, tRNA (guanosine(37)-N1)-methyltransferase TrmD	trmD	ACX60_RS01685	ABUW_0322	A1S_3162	KZA74_01680	6359.84	0.340384	-1.18741	2.2971	0.97575	0.837046	0.00264092	6319.53	-0.0885389	2.91807	0.119379	0.990942	0.0144531	0.980408
umuDAb	rplS	354,142..354,510	369	=>	rplS, 50S ribosomal protein L19	RP-L19, MRPL19, rplS	ACX60_RS01690	ABUW_0323	A1S_3161	KZA74_01685	4840.51	0.949393	-1.07897	3.37121	0.973209	0.837046	7.52837e-05	5340.63	0.177428	3.41892	0.506625	0.986515	0.0105038	0.886597
umuDAb	KZA74_01755	366,507..367,736	1230	=>	mdfA, MFS transporter	mdfA, cmr	ACX60_RS01760	ABUW_0337	A1S_3146	KZA74_01755	814.75	0.598705	-0.168794	1.01131	0.973209	0.968129	0.013564	999.925	0.15731	1.69052	1.16397	0.966731	0.0298197	0.187322
umuDAb	rplD	441,852..442,454	603	=>	rplD, 50S ribosomal protein L4	RP-L4, MRPL4, rplD	ACX60_RS02100	ABUW_0407	A1S_3079	KZA74_02100	8202.26	0.0300276	-1.63749	2.37052	0.996314	0.837046	0.0093477	7342.7	-0.298445	3.00055	-0.124095	0.963548	0.0302911	0.983022
umuDAb	rpsC	444,239..444,991	753	=>	rpsC, 30S ribosomal protein S3	RP-S3, rpsC	ACX60_RS02125	ABUW_0412	A1S_3075	KZA74_02125	14518.4	-0.718218	-2.15284	1.72218	0.973209	0.837046	0.118869	13007.6	-0.471881	3.17858	-0.23858	0.92869	0.0438503	0.971891
umuDAb	KZA74_07320	1,566,065..1,567,456	1392	=>	3-oxoacyl-ACP reductase	fabG	ACX60_RS07285	ABUW_1675	A1S_2061	KZA74_07320	2709.18	0.312124	-0.812524	1.56556	0.973209	0.837046	0.00919094	3080.38	0.840743	2.44837	0.403122	0.668343	0.00871282	0.866671
umuDAb	frr	1,682,963..1,683,517	555	=>	frr, ribosome recycling factor	frr, MRRF, RRF	ACX60_RS07930	ABUW_1737	A1S_1974	KZA74_07980	893.458	-2.31109	-1.89723	1.66704	0.0030344	0.18519	0.00403571	760.791	-0.154423	2.22106	-0.276333	0.984718	0.0235541	0.918126
umuDAb	alaS	2,637,461..2,640,097	2637	=>	alaS, alanine--tRNA ligase	AARS, alaS	ACX60_RS12340	ABUW_2748	A1S_1176	KZA74_12625	3290.06	-0.151675	-0.661785	1.38479	0.978617	0.837046	0.0030826	3843.63	0.688913	2.23386	0.582598	0.717392	0.0098195	0.744064
umuDAb	KZA74_12925	2,682,989..2,684,269	1281	=>	aspartate kinase	lysC	ACX60_RS12645	ABUW_2749	A1S_1142	KZA74_12925	2862.94	-0.112141	-0.898041	1.5436	0.988413	0.837046	0.0118795	3498.66	0.458098	2.55485	0.815464	0.876776	0.00888421	0.65083
umuDAb	KZA74_16540	3,473,811..3,475,523	1713	=>	electron transfer flavoprotein-ubiquinoneoxidoreductase	ETFDH	ACX60_RS16215	ABUW_3502	A1S_0378	KZA74_16540	4171.53	0.0117584	-0.881386	1.23104	0.999942	0.837046	0.079801	5419.99	0.611522	2.41111	1.15992	0.819892	0.029602	0.461266
umuDAb	KZA74_17025	ND	ND	ND	tuf, elongation factor Tu	tuf, TUFM	ACX60_RS16695	ABUW_3598	A1S_0279	KZA74_17025	462.345	0.155948	-0.940428	2.81362	0.986689	0.837046	1.11065e-05	465.353	-0.112804	2.42087	0.385653	0.986515	0.0243426	0.886226
umuDAb	gpmI	3,631,223..3,632,770	1548	<=	gpmI, 2,3-bisphosphoglycerate-independentphosphoglycerate mutase	gpmI	ACX60_RS16920	ABUW_3643	A1S_0230	KZA74_17250	2112.12	-0.021353	-0.432472	0.994136	0.991879	0.837046	0.00314509	2095.23	0.269055	1.3257	0.382046	0.884875	0.0458453	0.766199
umuDAb	lldP	3,806,953..3,808,620	1668	<=	lldP, L-lactate permease	lldP, lctP	ACX60_RS17730	ABUW_3814	A1S_0067	KZA74_18080	1310.71	0.708132	0.0563751	-0.927931	0.973209	0.996962	0.0557398	1406.88	0.126006	1.90747	-0.171424	0.984718	0.0136665	0.949721
umuDAb	KZA74_18085	3,808,995..3,810,365	1371	=>	phosphomannomutase/phosphoglucomutase	pgm	ACX60_RS17735	ABUW_3815	A1S_0066	KZA74_18085	1112.09	-0.177556	-0.488177	0.606827	0.973209	0.837046	0.0611576	1136.48	0.192793	1.3594	0.568834	0.915094	0.013232	0.50415
umuDAb	wbpD	3,824,545..3,825,123	579	<=	wbpD, UDP-2-acetamido-3-amino-2,3-dideoxy-D-glucuronate N-acetyltransferase	dcaB	ACX60_RS17805	NA	A1S_0054	KZA74_18155	1082.87	0.131789	-0.422868	0.466857	0.97967	0.837894	0.332864	1054.14	0.169326	1.47292	0.234686	0.953908	0.0316023	0.891358
umuDAb	murJ	3,833,203..3,834,753	1551	<=	murJ, murein biosynthesis integral membrane proteinMurJ	murJ, mviN	ACX60_RS17845	ABUW_3836	A1S_0046	KZA74_18195	1032.47	-0.276105	-0.329576	-0.0852004	0.973209	0.837046	0.722766	1043.03	0.365875	0.877793	0.667709	0.517535	0.00673668	0.0525106
umuDAb	ileS	3,858,988..3,861,825	2838	=>	ileS, isoleucine--tRNA ligase	IARS, ileS	ACX60_RS17975	ABUW_3862	A1S_0020	KZA74_18330	4230.2	-0.325647	-0.868551	0.867895	0.973209	0.837046	0.136536	4451.18	0.120721	1.95234	0.495596	0.986515	0.0369052	0.801622
umuDAb	lspA	3,861,818..3,862,348	531	=>	lspA, signal peptidase II	lspA	ACX60_RS17980	ABUW_3863	A1S_0019	KZA74_18335	769.868	-0.0471219	-0.636515	0.930936	0.991879	0.837046	0.0758797	833.141	0.239219	1.90416	0.578406	0.943636	0.0279158	0.723452
umuDAb	KZA74_18340	3,862,350..3,862,832	483	=>	peptidylprolyl isomerase	slpA	ACX60_RS17985	ABUW_3864	A1S_0018	KZA74_18340	675.158	0.144585	-0.606305	1.39211	0.981253	0.837046	0.00864395	728.307	0.338872	1.97823	0.524646	0.899864	0.0185292	0.760072
umuDAb	KZA74_18375	3,867,827..3,869,363	1537	<=	16S ribosomal RNA	16s	NA	NA	A1S_r	KZA74_18375	65.2712	0.237337	-0.316626	-3.03077	0.97575	0.953069	6.01978e-06	123.93	1.07206	3.15766	1.92257	0.619556	0.00235416	0.145644
umuDAb	KZA74_18440	3,882,396..3,883,517	1122	<=	5-(carboxyamino)imidazole ribonucleotidesynthase	purK	ACX60_RS18085	ABUW_3885	A1S_2963	KZA74_18440	1765.03	0.531025	-0.545398	1.24785	0.973209	0.837046	0.0098335	2550.61	0.783582	2.70556	1.31619	0.682781	0.00140418	0.259712
umuDAb	purE	3,883,527..3,884,039	513	<=	purE, 5-(carboxyamino)imidazole ribonucleotide mutase	purE	ACX60_RS18090	ABUW_3886	A1S_2964	KZA74_18445	888.161	0.581799	-0.387269	1.45972	0.973209	0.839664	0.000549062	1111.66	0.493408	2.11545	1.11483	0.801108	0.00447313	0.254275
umuDAb	mpl	3,884,827..3,886,200	1374	=>	mpl, UDP-N-acetylmuramate:L-alanyl-gamma-D-glutamyl- meso-diaminopimelate ligase	mpl	ACX60_RS18100	ABUW_3888	A1S_2966	KZA74_18455	1229.56	-0.0870647	-0.371282	-0.00192987	0.978912	0.837046	0.995986	1283.25	0.403271	1.25422	0.637802	0.717637	0.0158637	0.362579
umuDAb	yidC	3,898,796..3,900,556	1761	<=	yidC, membrane protein insertase YidC	yidC, spoIIIJ, OXA1, ccfA	ACX60_RS18175	ABUW_3903	A1S_2980	KZA74_18525	6446.19	0.0793143	-1.07316	1.95791	0.991879	0.837046	0.00864814	6988.74	-0.132277	2.62369	0.535695	0.986515	0.0183405	0.841314
umuDAb	yidD	3,900,562..3,900,882	321	<=	yidD, membrane protein insertion efficiency factorYidD	yidD, K08998	ACX60_RS18180	ABUW_3904	A1S_2982	KZA74_18530	693.172	-0.0335064	-0.85789	1.31456	0.991879	0.837046	0.0116141	674.786	-0.412715	1.89746	0.366504	0.842315	0.0158637	0.845935
umuDAb	rnpA	3,900,893..3,901,285	393	<=	rnpA, ribonuclease P protein component	rnpA	ACX60_RS18185	ABUW_3905	A1S_2983	KZA74_18535	1573.72	0.182617	-0.903757	3.0569	0.978912	0.837046	2.8076e-07	1430.39	-0.143279	2.29684	0.115386	0.984944	0.0127037	0.977484
umuDAb	rpmH	3,901,315..3,901,449	135	<=	rpmH, 50S ribosomal protein L34	rmpH, RP-L34, MRPL34	ACX60_RS18190	ABUW_3906	A1S_2984	KZA74_18540	1105.79	0.527448	-0.58067	4.39935	0.973209	0.853057	3.04135e-11	921.031	-0.255468	2.20138	-0.0433852	0.956084	0.0413167	0.993854
umuDAb	KZA74_18635	12,635..12,643	9	<=	IS4-like element ISAba1 family transposase	NA	NA	NA	A1S_0676	KZA74_18635	330.621	0.402305	0.123946	1.49939	0.973209	0.946187	4.89257e-11	330.372	0.597095	0.789226	0.29464	0.117224	0.0158637	0.547303
umuDAb	KZA74_18765	37,340..39,454	2115	<=	M48 family metallopeptidase	NA	NA	NA	A1S_0624	KZA74_18765	320.502	0.279555	-0.987448	0.262588	0.973209	0.837046	0.664955	378.471	0.288488	2.13911	0.740228	0.915811	0.00865071	0.599723
umuDAb	KZA74_19065	104,156..104,416	261	=>	KZA74_19065	NA	NA	NA	NA	KZA74_19065	140.299	0.819082	-0.404712	0.503653	0.966368	0.862627	0.325061	167.616	0.66597	1.6588	0.892866	0.565722	0.00938477	0.260741
umuDAb	KZA74_19230	131,774..132,877	1104	<=	type I DNA topoisomerase	NA	NA	NA	A1S_0651	KZA74_19230	911.662	0.243083	-0.297229	0.35829	0.973209	0.837894	0.26626	887.612	0.381939	0.824793	0.267978	0.469345	0.0108664	0.638857
WT	KZA74_07465	1,596,923..1,597,813	891	<=	KZA74_07465	NA	ACX60_RS07430	NA	A1S_3774	KZA74_07465	454.061	-0.331885	-0.10429	0.328876	0.973209	0.991966	0.47347	446.717	1.20603	0.459373	-0.181812	0.0223281	0.67818	0.894436
WT	KZA74_07470	1,597,886..1,598,575	690	<=	helix-turn-helix domain-containing protein	esvI	ACX60_RS07435	NA	A1S_2037	KZA74_07470	228.689	0.0960121	0.127155	0.256993	0.97801	0.956275	0.366281	221.719	1.46861	0.435302	-0.878067	0.00494802	0.752253	0.177655
WT	KZA74_07745	1,636,850..1,637,272	423	<=	KZA74_07745	NA	ACX60_RS07700	NA	NA	KZA74_07745	258.568	0.141877	1.22041	1.48891	0.982624	0.837046	0.00531639	329.695	2.66506	0.782835	0.311393	5.80578e-07	0.447244	0.841314
WT	KZA74_07750	1,637,301..1,638,593	1293	<=	Y-family DNA polymerase, A1S_2015 umuC	umuC (P1)	ACX60_RS07705	NA	A1S_2015	KZA74_07750	661.184	0.167505	1.22711	1.79241	0.97575	0.837046	7.59842e-05	945.757	2.63072	1.38055	0.73582	1.18449e-05	0.0968007	0.508219
WT	KZA74_07755	1,638,709..1,639,347	639	<=	SRAP, SOS response-associated peptidase familyprotein	NA	ACX60_RS07710	NA	A1S_2014	KZA74_07755	202.991	0.526078	0.586301	0.774532	0.973209	0.837046	0.125887	226.1	2.26275	0.448202	-0.346941	2.84785e-05	0.785814	0.809267
WT	umuD	2,383,323..2,383,934	612	<=	umuDAb, A1S_1389	umuDAb	ACX60_RS11175	ABUW_2431	A1S_1389	KZA74_11460	1987.79	-0.299824	-2.48111	4.67936	0.973209	1.85293e-11	4.39837e-51	1448.13	2.40903	0.424263	-0.740818	2.78674e-08	0.780104	0.262273
WT	KZA74_11465	2,384,217..2,384,453	237	=>	ddrR, A1S_1388	ddrR	ACX60_RS11180	ABUW_2432	A1S_1388	KZA74_11465	4095.47	-0.00157493	6.00172	4.40523	0.999942	2.2512e-18	3.69176e-11	3428.85	3.91739	-0.0458782	-1.07658	9.56467e-07	0.989046	0.452476
WT	KZA74_12635	2,641,682..2,642,665	984	<=	KZA74_12635	tolA?	ACX60_RS12350	NA	A1S_3622	KZA74_12635	285.855	-0.238083	0.372097	0.745199	0.973209	0.837894	0.0715885	450.7	2.74984	0.963381	1.04457	1.68274e-07	0.269963	0.160561
WT	KZA74_12645	ND	ND	=>	umuD, A1S_1174	umuD (P3)	ACX60_RS12360	NA	A1S_1174	KZA74_12645	1083.93	0.100153	2.66893	5.201	0.987406	3.26819e-08	3.68594e-35	1179.29	3.75718	0.414052	0.507285	5.25368e-12	0.818109	0.678
WT	KZA74_12650	2,644,092..2,645,390	1299	=>	rumB, A1S_1173	umuC (P3)	ACX60_RS12365	NA	A1S_1173	KZA74_12650	1075.57	-0.106847	1.43049	2.82444	0.988413	0.837046	3.31482e-08	1553.1	3.4794	1.02581	0.725673	4.99814e-08	0.369925	0.576316
WT	KZA74_12655	2,645,428..2,645,940	513	=>	KZA74_12655	NA	ACX60_RS12370	NA	NA	KZA74_12655	439.143	-1.1458	0.402853	0.751272	0.928724	0.924122	0.285882	634.501	2.33284	0.663227	1.10023	0.00389208	0.753482	0.337412
WT	KZA74_18970	ND	ND	ND	umuD, A1S_0636	NA	NA	NA	A1S_0636	KZA74_18970	1470.71	0.150739	3.98745	4.89293	0.978617	2.76014e-20	1.56796e-32	1377.33	3.33697	0.28072	0.00284733	4.0894e-08	0.892081	1
WT	KZA74_18975	86,100..86,102	3	==	umuC, A1S_0637	NA	NA	NA	A1S_0637	KZA74_18975	1543.34	0.569971	2.39778	3.42457	0.973209	3.26819e-08	2.90313e-19	1389.31	2.08249	0.241118	-0.16452	1.0317e-05	0.88179	0.917806
WT ddrR	KZA74_07535	1,605,292..1,606,092	801	=>	phage antirepressor protein	NA	ACX60_RS07500	NA	A1S_2034	KZA74_07535	276.167	-0.33981	0.255549	-0.286868	0.973209	0.913014	0.504597	485.471	1.84027	0.967673	2.69234	0.000573023	0.217204	1.04501e-08
WT ddrR	KZA74_07540	1,606,307..1,606,480	174	=>	KZA74_07540	NA	ACX60_RS07505	NA	NA	KZA74_07540	140.932	-0.924429	0.196808	0.661812	0.973209	0.993335	0.471389	299.347	2.57412	0.40307	2.63402	0.00350113	0.884227	0.00176785
WT ddrR	KZA74_07690	1,624,997..1,625,320	324	=>	DUF4236 domain-containing protein	NA	NA	NA	NA	KZA74_07690	179.781	-0.593643	-0.497696	-2.49469	0.973209	0.848207	1.0962e-05	265.215	1.70917	1.31291	2.21979	0.0152694	0.120643	0.00029926
WT ddrR	KZA74_10215	2,151,419..2,151,616	198	<=	KZA74_10215	NA	ACX60_RS09945	ABUW_0814|ABUW_1441	A1S_3706	KZA74_10215	37.5027	-0.262124	0.00109717	-0.98939	0.973209	1	0.0206212	70.7333	1.75254	1.20005	3.2529	0.000720608	0.0794831	5.99723e-14
WT ddrR	KZA74_12710	2,658,355..2,658,855	501	<=	zinc ribbon domain-containing protein	NA	ACX60_RS12425	NA	A1S_3619	KZA74_12710	742.404	-0.984208	-0.390832	0.423774	0.736269	0.877353	0.436833	1320.97	2.3993	1.54429	1.57011	0.000142576	0.0555758	0.0322208
WT ddrR umuDAb	KZA74_00195	47,881..48,534	654	=>	START domain	NA	ACX60_RS00195	ABUW_0040	A1S_3441	KZA74_00195	407.09	0.16432	-0.1298	-0.227367	0.973209	0.927203	0.318061	402.693	0.577062	0.641503	0.665655	0.0324828	0.0165011	0.00365129
WT ddrR umuDAb	KZA74_05595	1,189,950..1,190,978	1029	<=	KZA74_05595	NA	ACX60_RS05565	ABUW_1162	A1S_3804	KZA74_05595	518.256	1.76874	0.244173	0.86564	0.00806656	0.947349	0.0810177	1183.67	1.61446	2.32555	3.52689	0.0230377	0.000104383	3.21916e-11
WT ddrR umuDAb	KZA74_07410	1,590,009..1,591,271	1263	=>	integrase family protein	NA	ACX60_RS07375	NA	A1S_2040	KZA74_07410	233.984	0.112719	0.17554	-0.654644	0.978617	0.945642	0.0524554	381.982	2.30281	1.43269	1.70012	8.71684e-07	0.0113178	0.000619883
WT ddrR umuDAb	KZA74_07415	1,591,277..1,591,546	270	<=	DNA-binding protein	NA	ACX60_RS07380	NA	NA	KZA74_07415	90.9578	0.51821	0.416595	-3.92182	0.973209	0.873284	3.17467e-12	654.019	4.44236	3.70287	8.33155	7.5424e-13	2.21914e-09	8.72172e-42
WT ddrR umuDAb	KZA74_07420	1,591,547..1,591,804	258	<=	KZA74_07420	NA	ACX60_RS07385	NA	NA	KZA74_07420	72.5278	-0.115827	-0.0207965	-3.87973	0.980598	0.996962	2.72875e-18	721.205	4.29387	4.62212	8.40722	1.32318e-10	5.8351e-12	2.75357e-38
WT ddrR umuDAb	KZA74_07425	1,591,808..1,592,092	285	<=	KZA74_07425	NA	ACX60_RS07390	NA	NA	KZA74_07425	48.8497	0.522763	0.37647	-2.85155	0.973209	0.946187	0.000131904	482.876	4.11242	4.09316	8.38754	3.46477e-08	3.25952e-08	1.20077e-32
WT ddrR umuDAb	KZA74_07430	1,592,089..1,592,496	408	<=	KZA74_07430	NA	ACX60_RS07395	NA	A1S_3603	KZA74_07430	15.3204	-0.494287	0.423894	-2.81771	0.973209	0.944581	0.00104572	268.429	4.03874	4.22163	9.19566	1.45298e-06	3.19313e-07	9.68895e-30
WT ddrR umuDAb	KZA74_07435	1,592,497..1,592,748	252	<=	KZA74_07435	NA	ACX60_RS07400	NA	A1S_3604	KZA74_07435	20.9341	-1.17577	-0.339688	-3.70929	0.973209	0.96396	1.21722e-05	296.776	3.63434	4.31941	9.21719	9.31242e-06	7.8548e-08	8.82064e-31
WT ddrR umuDAb	KZA74_07440	1,592,750..1,593,958	1209	<=	KZA74_07440	NA	ACX60_RS07405	NA	A1S_3776	KZA74_07440	236.68	-0.0822325	0.293004	-3.34413	0.988413	0.913014	1.94898e-13	3595.96	3.8508	4.44498	9.56763	7.08991e-07	6.46851e-09	4.0333e-41
WT ddrR umuDAb	KZA74_07445	1,593,955..1,595,076	1122	<=	ATP-binding protein	NA	ACX60_RS07410	NA	A1S_2039	KZA74_07445	220.858	-0.795418	-0.537442	-4.04846	0.973209	0.837046	1.13683e-14	4509.75	3.86809	5.49601	10.1011	6.6591e-06	4.46897e-11	1.17963e-38
WT ddrR umuDAb	KZA74_07450	1,595,087..1,595,410	324	<=	KZA74_07450	NA	ACX60_RS07415	NA	NA	KZA74_07450	69.4788	0.213473	-0.0775171	-5.23718	0.978617	0.996962	4.33323e-12	804.414	3.53026	4.53575	10.8684	1.25815e-05	6.38832e-09	1.9953e-40
WT ddrR umuDAb	KZA74_07455	1,595,413..1,595,853	441	<=	KZA74_07455	NA	ACX60_RS07420	NA	A1S_2038	KZA74_07455	75.4505	-0.398458	-0.0711145	-4.92588	0.97575	0.996962	2.80177e-08	1390.87	2.87231	3.59797	11.5816	0.00290469	5.27946e-05	1.37516e-43
WT ddrR umuDAb	KZA74_07475	1,598,703..1,598,879	177	=>	Cro/Cl family transcriptional regulator	NA	ACX60_RS07440	NA	A1S_3773	KZA74_07475	21.5592	-0.779119	-0.193956	-4.19778	0.973209	0.990942	1.4542e-06	380.36	3.30146	4.82554	10.3099	0.00025178	8.06239e-09	3.35047e-32
WT ddrR umuDAb	KZA74_07480	1,598,876..1,599,139	264	=>	YdaU family protein	NA	ACX60_RS07445	NA	NA	KZA74_07480	58.1422	0.0508377	0.0100514	-5.67335	0.991879	0.997921	7.42353e-14	918.985	4.54665	5.67498	10.9062	1.09814e-07	2.20796e-11	2.5411e-32
WT ddrR umuDAb	KZA74_07485	1,599,183..1,599,458	276	=>	KZA74_07485	NA	NA	NA	NA	KZA74_07485	46.2788	0.609266	0.365236	-4.02735	0.973209	0.883051	9.24079e-12	690.304	4.56294	4.82589	10.2114	2.69157e-10	2.14575e-11	6.68925e-43
WT ddrR umuDAb	KZA74_07490	1,599,455..1,599,739	285	=>	KZA74_07490	NA	ACX60_RS07450	NA	A1S_3772	KZA74_07490	70.4138	-0.497905	-0.263028	-4.7714	0.973209	0.95893	1.31311e-13	880.098	3.93968	5.01359	9.77781	8.89443e-07	2.24421e-10	1.07523e-35
WT ddrR umuDAb	KZA74_07495	1,599,736..1,601,289	1554	=>	DNA cytosine methyltransferase	DNMT1, dcm	ACX60_RS07455	NA	A1S_2036	KZA74_07495	330.931	-0.284581	-0.0586252	-4.26005	0.975111	0.996962	7.42353e-14	3983.22	3.90287	4.55196	9.63409	3.37339e-06	3.59945e-08	1.64161e-36
WT ddrR umuDAb	KZA74_07500	1,601,286..1,602,236	951	=>	KZA74_07500	NA	ACX60_RS07460	NA	A1S_3771	KZA74_07500	90.2099	-0.88362	-0.247606	-3.02399	0.853223	0.946187	1.98081e-10	1529.93	4.07815	4.757	8.92819	1.80978e-08	3.95675e-11	3.1999e-40
WT ddrR umuDAb	KZA74_07505	1,602,229..1,602,978	750	=>	KZA74_07505	NA	ACX60_RS07465	NA	A1S_3770	KZA74_07505	204.226	-0.79437	-0.374697	-4.50771	0.973209	0.917931	5.86786e-14	1607.89	3.4398	4.0163	8.75451	1.50918e-05	2.41904e-07	5.94149e-34
WT ddrR umuDAb	KZA74_07510	1,602,975..1,603,316	342	=>	KZA74_07510	NA	ACX60_RS07470	NA	NA	KZA74_07510	88.9031	-0.235697	-0.192127	-4.5728	0.97575	0.975675	1.55973e-16	575.515	3.63543	3.8975	8.37381	6.59888e-07	8.56343e-08	3.16011e-32
WT ddrR umuDAb	KZA74_07515	1,603,303..1,603,683	381	=>	HNH endonuclease	NA	ACX60_RS07475	NA	A1S_2035	KZA74_07515	200.527	0.097641	0.251612	-5.02349	0.988793	0.968129	1.30109e-15	919.347	3.40317	3.10601	8.48109	9.55963e-07	1.3299e-05	4.01281e-37
WT ddrR umuDAb	KZA74_07520	1,603,999..1,604,187	189	=>	KZA74_07520		ACX60_RS07480	NA	A1S_3769	KZA74_07520	52.7547	0.278827	0.261462	-4.57767	0.97575	0.97666	7.06808e-09	219.653	3.07135	2.98518	8.07026	6.11114e-06	1.3386e-05	2.31225e-30
WT ddrR umuDAb	KZA74_07525	1,604,187..1,604,591	405	=>	DUF1064 domain-containing protein	NA	ACX60_RS07490	NA	NA	KZA74_07525	86.7054	-0.0889651	0.325756	-3.83565	0.9888	0.937955	9.46379e-11	391.539	3.25847	2.74907	7.50959	1.81939e-08	3.47189e-06	4.80332e-40
WT ddrR umuDAb	KZA74_07530	1,604,594..1,605,031	438	=>	antitermination protein	NA	ACX60_RS07495	NA	A1S_3768	KZA74_07530	61.2203	-0.0509864	0.478521	-2.81889	0.991879	0.856274	1.6423e-06	289.522	3.51822	2.58737	6.70806	3.08118e-10	7.5957e-06	8.494e-36
WT ddrR umuDAb	KZA74_07550	1,607,491..1,607,709	219	=>	KZA74_07550	NA	ACX60_RS07515	NA	NA	KZA74_07550	69.6265	0.491846	0.743242	-0.278704	0.973209	0.837046	0.515233	410.739	4.61589	2.15936	5.23899	1.4377e-20	7.04719e-05	1.23215e-29
WT ddrR umuDAb	KZA74_07555	1,607,956..1,608,331	376	=>	KZA74_07555	NA	ACX60_RS07520	NA	NA	KZA74_07555	43.0288	0.387595	0.371272	0.259141	0.973209	0.899809	0.658707	171.809	3.74507	2.26114	4.08783	9.2309e-11	0.000327476	5.02895e-15
WT ddrR umuDAb	KZA74_07560	1,608,434..1,608,862	429	=>	KZA74_07560	NA	ACX60_RS07525	NA	A1S_2033	KZA74_07560	33.3992	0.104512	0.406535	-4.88251	0.9888	0.930343	9.93739e-09	165.982	3.59728	2.03139	9.01111	1.43071e-07	0.0158637	2.43537e-29
WT ddrR umuDAb	KZA74_07565	1,608,831..1,609,472	642	=>	KZA74_07565	NA	ACX60_RS07530	NA	A1S_2032	KZA74_07565	213.296	-0.399023	-0.199396	-6.44285	0.973209	0.988928	4.77615e-18	1028.47	3.58965	2.87429	9.5698	2.39728e-06	0.0004399	9.12165e-37
WT ddrR umuDAb	KZA74_07570	1,609,531..1,610,001	471	=>	DUF2280 domain-containing protein	NA	ACX60_RS07535	ABUW_1291	A1S_2031	KZA74_07570	77.382	0.0149272	-0.0759281	-4.47288	0.999942	0.996962	1.3947e-09	649.609	4.30616	3.62428	9.10897	1.81005e-08	3.77957e-06	4.23141e-34
WT ddrR umuDAb	terL	1,609,991..1,611,418	1428	=>	terL, phage terminase large subunit	terL	ACX60_RS07540	ABUW_1292	A1S_2030	KZA74_07575	427.759	-0.478523	-0.124373	-5.43634	0.973209	0.996962	7.53563e-18	2286.35	3.77563	3.08541	8.63913	1.14276e-06	0.000183958	3.54328e-33
WT ddrR umuDAb	KZA74_07580	1,611,415..1,612,866	1452	=>	DUF4055 domain-containing protein	NA	ACX60_RS07545	ABUW_1293	A1S_2029	KZA74_07580	386.161	0.0373652	0.10555	-5.32452	0.991879	0.996962	4.49495e-21	2248.38	4.06203	3.29642	8.94577	2.47798e-08	1.18323e-05	9.10557e-39
WT ddrR umuDAb	KZA74_07585	1,612,868..1,613,971	1104	=>	KZA74_07585	NA	ACX60_RS07550	NA	A1S_2028	KZA74_07585	310.797	-0.273275	0.102852	-3.56592	0.973209	0.99503	7.49741e-13	2196.33	4.25475	3.55194	7.49748	6.08473e-09	1.96601e-06	1.37391e-28
WT ddrR umuDAb	KZA74_07590	1,613,980..1,614,408	429	=>	KZA74_07590	NA	ACX60_RS07555	ABUW_1295	A1S_3767	KZA74_07590	252.549	-0.648923	-0.106958	0.951505	0.973209	0.993335	0.0590929	736.793	3.01575	2.61466	2.76554	3.69029e-05	0.000729033	0.00016048
WT ddrR umuDAb	KZA74_07595	1,614,507..1,614,743	237	=>	KZA74_07595	NA	ACX60_RS07560	ABUW_0778|ABUW_1296	NA	KZA74_07595	47.042	-0.313958	-0.547533	-1.5595	0.973209	0.837046	0.000192007	602.514	4.52913	4.7492	6.99265	1.52094e-10	2.2573e-11	6.51301e-27
WT ddrR umuDAb	KZA74_07600	1,614,967..1,615,158	192	=>	KZA74_07600	NA	ACX60_RS07565	ABUW_1297	NA	KZA74_07600	32.3471	-0.455412	-0.0506574	-3.17997	0.973209	0.996962	4.90252e-06	520.414	4.58432	4.37771	9.0595	7.37556e-10	3.80238e-09	2.61229e-36
WT ddrR umuDAb	KZA74_07605	1,615,272..1,616,039	768	=>	KZA74_07605	NA	ACX60_RS07570	ABUW_1298	A1S_2027	KZA74_07605	283.414	-0.300744	-0.161436	-5.47383	0.973209	0.988928	1.21937e-21	3743.45	4.79664	4.78179	10.4283	5.64337e-09	5.32775e-09	6.77084e-41
WT ddrR umuDAb	KZA74_07610	1,616,067..1,617,023	957	=>	phage capsid protein	NA	ACX60_RS07575	ABUW_1299	A1S_2025	KZA74_07610	350	-0.0681986	-0.0685146	-2.58821	0.988413	0.99503	3.74324e-15	5235.73	5.14685	5.06837	7.9	3.63017e-11	5.63186e-11	1.92497e-28
WT ddrR umuDAb	KZA74_07615	1,617,089..1,617,754	666	=>	stress-responsive nuclear envelope protein	NA	ACX60_RS07580	ABUW_1300	A1S_3765	KZA74_07615	124.504	-0.435386	-0.151937	-4.31991	0.973209	0.990942	4.20037e-14	1795.73	4.91745	4.70883	9.47284	1.28563e-09	6.20151e-09	4.62251e-35
WT ddrR umuDAb	KZA74_07620	1,617,759..1,618,148	390	=>	KZA74_07620	NA	ACX60_RS07585	ABUW_1301	A1S_3764	KZA74_07620	40.7775	-0.552223	-0.116408	-3.15644	0.973209	0.993407	3.03301e-08	634.108	5.2908	4.92631	8.05965	5.25368e-12	1.29763e-10	4.05706e-28
WT ddrR umuDAb	KZA74_07625	1,618,150..1,618,518	369	=>	glutamate 5-kinase	NA	ACX60_RS07590	ABUW_0785|ABUW_1302	A1S_2024	KZA74_07625	63.8332	-0.0895173	-0.384176	-3.34243	0.9888	0.917931	9.44695e-08	577.999	4.61517	4.2154	7.52435	1.51596e-10	5.2305e-09	4.08595e-28
WT ddrR umuDAb	KZA74_07630	1,618,527..1,618,934	408	=>	KZA74_07630	NA	ACX60_RS07595	ABUW_1303	A1S_3763	KZA74_07630	116.923	0.0542082	0.0281904	-3.31442	0.989848	0.996962	2.10415e-14	674.911	4.10989	3.62961	6.57232	1.05222e-09	8.76069e-08	4.07308e-25
WT ddrR umuDAb	KZA74_07635	1,618,906..1,619,274	369	=>	HK97 gp10 family phage protein	NA	ACX60_RS07600	ABUW_1304	NA	KZA74_07635	138.915	-0.107629	-0.238845	-3.92434	0.980598	0.913014	2.3445e-23	774.187	3.98963	3.58734	6.97238	8.34305e-11	4.74579e-09	5.17486e-33
WT ddrR umuDAb	KZA74_07640	1,619,276..1,619,674	399	=>	DUF4128 domain-containing protein	NA	ACX60_RS07605	ABUW_0787|ABUW_1305	A1S_2023	KZA74_07640	147.441	-0.0407094	-0.0654627	-2.45577	0.991879	0.996962	1.11221e-07	673.925	3.82854	3.07297	5.36091	1.90795e-10	5.39369e-07	1.35492e-21
WT ddrR umuDAb	KZA74_07645	1,619,676..1,619,894	219	=>	KZA74_07645	NA	ACX60_RS07610	ABUW_0788|ABUW_1306	A1S_3762	KZA74_07645	52.101	-0.199027	0.0253818	-1.94414	0.974056	0.996962	3.98121e-07	385.189	4.56705	4.07686	5.29794	1.80406e-11	1.80855e-09	1.09556e-16
WT ddrR umuDAb	KZA74_07650	1,620,003..1,620,524	522	=>	SH3 domain-containing protein	NA	ACX60_RS07615	NA	NA	KZA74_07650	204.604	0.0740255	0.357755	-0.25058	0.987406	0.837046	0.472071	818.806	3.70228	2.63694	4.02428	9.2309e-11	7.5957e-06	3.94025e-14
WT ddrR umuDAb	KZA74_07655	1,620,621..1,620,974	354	=>	KZA74_07655	NA	ACX60_RS07620	ABUW_0789|ABUW_1307	A1S_3761	KZA74_07655	105.244	-0.466746	-0.249018	-5.70063	0.973209	0.976892	1.15124e-13	759.364	4.15669	3.90301	9.13751	5.2089e-07	3.7504e-06	1.63418e-28
WT ddrR umuDAb	KZA74_07660	1,620,974..1,622,152	1179	=>	phage tail protein	NA	ACX60_RS07625	ABUW_0790|ABUW_1308	A1S_2022	KZA74_07660	375.34	0.00341002	-0.000629477	-4.60496	0.999942	1	4.22492e-21	2859.55	4.34879	4.00434	8.53288	1.47747e-08	2.10635e-07	4.08967e-33
WT ddrR umuDAb	KZA74_07665	1,622,205..1,623,122	918	=>	KZA74_07665	NA	ACX60_RS07630	ABUW_0791|ABUW_1309	A1S_2021	KZA74_07665	234.407	-0.340789	-0.18053	-5.07758	0.973209	0.983538	3.83404e-18	2659.59	4.6384	4.54064	9.71039	3.36432e-08	6.88851e-08	7.21148e-35
WT ddrR umuDAb	KZA74_07670	1,623,192..1,623,707	516	=>	KZA74_07670	NA	ACX60_RS07635	ABUW_0792|ABUW_1310	A1S_3760	KZA74_07670	126.904	0.0432972	0.0298095	-4.82932	0.991879	0.996962	2.45784e-11	1141.53	4.35189	4.10692	9.43972	1.34731e-07	8.61611e-07	6.3195e-33
WT ddrR umuDAb	KZA74_07680	1,624,308..1,624,712	405	=>	type II toxin-antitoxin system HicB familyantitoxin	hicB	ACX60_RS07645	NA	A1S_2019	KZA74_07680	464.669	1.71033	-0.0968915	0.533852	NA	NA	NA	1321.76	3.28268	3.34279	3.02086	0.00367313	0.00313754	0.007692
WT ddrR umuDAb	KZA74_07685	1,624,812..1,624,988	177	=>	KZA74_07685	NA	ACX60_RS07650	ABUW_0796	NA	KZA74_07685	48.1069	0.0359844	-0.16616	-0.386547	0.992114	0.990942	0.584186	105.823	2.85203	2.28255	2.05123	8.30098e-05	0.00510039	0.00959586
WT ddrR umuDAb	KZA74_07695	1,625,354..1,625,743	390	=>	KZA74_07695	NA	ACX60_RS07655	NA	A1S_3759	KZA74_07695	330.078	-0.902324	-0.575208	-0.517108	0.928724	0.837046	0.349871	565.17	1.9781	1.73107	1.84532	0.00448334	0.0236137	0.0078208
WT ddrR umuDAb	KZA74_07700	1,625,836..1,630,731	4896	=>	tape measure protein	NA	ACX60_RS07660	ABUW_0804	A1S_2018	KZA74_07700	1445.57	-0.371743	-0.140321	-1.54436	0.973209	0.976892	9.26116e-05	8016.75	3.99466	3.24036	5.14139	1.01579e-09	1.2334e-06	3.00521e-17
WT ddrR umuDAb	KZA74_07705	1,630,781..1,631,179	399	=>	KZA74_07705	NA	ACX60_RS07665	ABUW_0805|ABUW_1320	A1S_3758	KZA74_07705	110.847	-0.155503	0.131094	-5.21236	0.984383	0.993335	2.60279e-15	574.411	3.97291	2.9856	8.41417	5.64337e-09	2.76291e-05	4.14088e-34
WT ddrR umuDAb	KZA74_07710	1,631,179..1,631,685	507	=>	DUF1833 domain-containing protein	NA	ACX60_RS07670	ABUW_0806|ABUW_1321	NA	KZA74_07710	130.886	0.111359	0.0978353	-4.59576	0.988413	0.996962	8.49699e-12	857.177	4.3438	3.45136	8.38077	2.90768e-09	4.51998e-06	1.71309e-32
WT ddrR umuDAb	KZA74_07715	1,631,682..1,632,044	363	=>	KZA74_07715	NA	ACX60_RS07675	ABUW_0807|ABUW_1322	A1S_3757	KZA74_07715	75.2106	-0.609351	-0.436587	-4.75681	0.973209	0.896328	8.21359e-13	520.833	4.10886	3.92406	7.83625	3.0132e-08	1.44329e-07	7.88761e-27
WT ddrR umuDAb	KZA74_07720	1,632,037..1,635,483	3447	=>	KZA74_07720	NA	ACX60_RS07680	ABUW_0808|ABUW_1323	A1S_2017	KZA74_07720	1199.17	-0.455546	-0.18762	-3.17425	0.973209	0.968746	1.53091e-12	6983.23	3.8359	3.37085	6.67944	1.43071e-07	6.69862e-06	1.45349e-23
WT ddrR umuDAb	KZA74_07725	1,635,550..1,635,825	276	=>	holin	NA	ACX60_RS07685	NA	A1S_3755	KZA74_07725	102.354	0.127842	0.233271	-9.40982	0.988413	0.976892	1.48531e-11	427.583	3.74498	2.88389	12.0152	2.9955e-07	0.000223588	9.42279e-18
WT ddrR umuDAb	KZA74_07730	1,635,809..1,636,318	510	=>	lysozyme	NA	ACX60_RS07690	NA	A1S_2016	KZA74_07730	121.589	-0.398988	0.180295	-7.83964	0.97575	0.993335	3.46079e-13	690.647	4.00447	3.17701	11.0617	1.56026e-06	0.000393481	1.76413e-26
WT ddrR umuDAb	KZA74_07735	1,636,318..1,636,686	369	=>	KZA74_07735	NA	ACX60_RS07695	NA	A1S_3754	KZA74_07735	75.6415	-0.544626	-0.208143	-7.4884	0.973209	0.987143	1.56596e-13	534.333	4.11981	3.79875	10.81	7.55543e-08	1.0365e-06	4.19355e-26
WT ddrR umuDAb	KZA74_07740	1,636,655..1,636,825	171	=>	KZA74_07740	NA	NA	NA	NA	KZA74_07740	23.5226	-0.146293	0.113328	-8.43272	0.988413	0.996962	3.36098e-09	154.526	4.39072	3.67398	11.0646	5.13859e-09	1.47936e-06	4.92244e-15
WT ddrR umuDAb	KZA74_10220	2,151,852..2,152,214	363	<=	KZA74_10220	NA	ACX60_RS09950	NA	A1S_3705	KZA74_10220	93.6245	0.098081	0.126065	-4.00565	0.988568	0.993335	2.80688e-11	366.643	2.63088	3.04857	7.38589	0.000696649	3.95624e-05	2.00465e-27
WT ddrR umuDAb	KZA74_10225	2,152,211..2,152,759	549	<=	glycoside hydrolase family protein	NA	ACX60_RS09955	NA	A1S_1600	KZA74_10225	118.748	-0.605148	-0.0470183	-7.2124	0.973209	0.996962	2.25239e-15	334.276	2.22049	2.6134	9.0641	0.0184207	0.00255762	1.90693e-24
WT ddrR umuDAb	KZA74_10230	2,152,743..2,152,982	240	<=	KZA74_10230	NA	ACX60_RS09960	NA	A1S_3704	KZA74_10230	76.0834	0.099676	0.218547	-6.84838	0.988413	0.968356	1.63707e-15	234.729	2.91754	3.06223	7.67857	0.000135194	5.12209e-05	1.25538e-15
WT ddrR umuDAb	KZA74_10235	2,153,035..2,153,814	780	<=	KZA74_10235	NA	ACX60_RS09965	NA	A1S_3703	KZA74_10235	208.211	-0.0318709	-0.0568799	-2.15242	0.991879	0.996962	6.07733e-11	751.449	2.8365	3.43671	4.63168	2.67474e-05	1.53092e-07	3.44245e-14
WT ddrR umuDAb	KZA74_10240	2,153,817..2,155,673	1857	<=	KZA74_10240	NA	ACX60_RS09970	NA	A1S_1599	KZA74_10240	397.734	0.0286067	0.0712148	-3.72615	0.991879	0.996962	3.58205e-17	1496.2	2.77188	3.13024	6.77129	0.000165991	1.22517e-05	3.12195e-26
WT ddrR umuDAb	KZA74_10245	2,155,734..2,158,592	2859	<=	KZA74_10245	NA	ACX60_RS09975	NA	A1S_1598	KZA74_10245	648.293	-0.325973	0.0331832	-1.75894	0.973209	0.996962	4.52526e-05	2013.23	2.44565	2.62231	4.68232	0.000678532	0.00020394	2.54932e-14
WT ddrR umuDAb	KZA74_10250	2,158,906..2,159,412	507	<=	KZA74_10250	NA	ACX60_RS09985	NA	A1S_3702	KZA74_10250	133.499	0.245251	0.342869	-0.57573	0.973209	0.837046	0.087253	535.258	3.03608	3.2067	4.41745	4.47817e-07	8.0119e-08	1.27187e-15
WT ddrR umuDAb	KZA74_10255	2,159,405..2,159,887	483	<=	KZA74_10255	NA	ACX60_RS09990	NA	NA	KZA74_10255	177.255	0.00539382	0.0288249	-2.74245	0.999942	0.996962	3.28344e-11	477.404	2.39142	2.70498	4.77717	8.86202e-05	5.67375e-06	1.13824e-18
WT ddrR umuDAb	KZA74_10260	2,159,895..2,163,482	3588	<=	phage tail tape meausure protein lambda family	NA	ACX60_RS09995	NA	A1S_1596	KZA74_10260	920.176	-0.320818	-0.127065	-1.78615	0.973209	0.987212	1.7468e-05	3359.36	2.64153	3.08884	4.89785	0.00053137	2.31019e-05	7.6469e-14
WT ddrR umuDAb	KZA74_10265	2,163,542..2,163,925	384	<=	KZA74_10265	NA	ACX60_RS10000	NA	A1S_3701	KZA74_10265	103.559	0.121866	0.0443926	0.53001	0.978617	0.996962	0.147688	262.034	2.23764	2.71146	2.93105	0.0016783	4.92369e-05	2.95339e-06
WT ddrR umuDAb	KZA74_10270	2,164,215..2,164,631	417	<=	KZA74_10270	NA	ACX60_RS10005	NA	A1S_3700	KZA74_10270	145.287	-0.177963	-0.0185933	-2.32188	0.973927	0.996962	1.41142e-11	1421.55	4.03353	4.72914	7.01893	1.3636e-07	4.55746e-10	1.79597e-23
WT ddrR umuDAb	KZA74_10275	2,164,631..2,165,110	480	<=	structural protein 3 family protein	NA	ACX60_RS10010	NA	A1S_1595	KZA74_10275	122.811	-0.468575	-0.0833005	-4.45553	0.973209	0.996962	5.18005e-12	1174.88	3.75592	4.73306	8.80096	1.66393e-05	2.17596e-08	3.63384e-28
WT ddrR umuDAb	KZA74_10280	2,165,180..2,165,554	375	<=	DUF3168 domain-containing protein	NA	ACX60_RS10015	NA	A1S_1594	KZA74_10280	68.2919	-0.590179	-0.313402	-3.87338	0.973209	0.944581	1.65373e-10	693.98	3.74181	4.84112	8.2971	7.07328e-06	2.27694e-09	6.52355e-27
WT ddrR umuDAb	KZA74_10285	2,165,554..2,166,039	486	<=	HK97 gp10 family phage protein	NA	ACX60_RS10020	NA	A1S_1593	KZA74_10285	118.86	-0.0809528	0.0529533	-5.14132	0.991879	0.996962	5.46781e-13	475.995	2.68686	3.29084	8.18851	0.00242168	6.44298e-05	1.64159e-26
WT ddrR umuDAb	KZA74_10290	2,166,043..2,166,399	357	<=	phage head closure protein	NA	ACX60_RS10025	NA	A1S_1592	KZA74_10290	99.0606	-0.229465	-0.174883	-4.9179	0.97575	0.988928	2.61227e-14	484.059	2.94188	3.82968	7.94704	0.000512343	1.30124e-06	1.90423e-25
WT ddrR umuDAb	KZA74_10295	2,166,401..2,166,688	288	<=	head-tail connector protein	NA	ACX60_RS10030	NA	NA	KZA74_10295	47.8759	-0.244613	0.0517686	-4.82057	0.976052	0.996962	3.18622e-10	290.436	3.36255	4.03314	8.29452	0.00381566	0.000197221	3.43211e-16
WT ddrR umuDAb	KZA74_10300	2,166,685..2,166,861	177	<=	KZA74_10300	NA	ACX60_RS10035	NA	A1S_3699	KZA74_10300	38.5457	0.237105	-0.0557413	-5.158	0.976014	0.996962	3.81584e-10	243.751	3.54019	4.38705	8.64268	1.44722e-05	2.9871e-08	1.61772e-22
WT ddrR umuDAb	KZA74_10305	2,166,909..2,168,081	1173	<=	phage major capsid protein	NA	ACX60_RS10040	NA	A1S_1591	KZA74_10305	275.217	-1.1777	-0.421937	-5.01806	0.891058	0.917517	6.95695e-14	2830.9	3.54338	4.69467	9.43621	0.000331281	3.88275e-07	1.47376e-28
WT ddrR umuDAb	KZA74_10310	2,168,074..2,168,736	663	<=	HK97 family phage prohead protease	K06904	ACX60_RS10045	NA	A1S_1590	KZA74_10310	180.273	-0.643802	-0.406866	-8.55314	0.973209	0.946187	1.8765e-16	703.781	2.21085	3.157	11.577	0.0498769	0.000659343	3.1324e-29
WT ddrR umuDAb	KZA74_10315	2,168,729..2,169,955	1227	<=	phage portal protein	NA	ACX60_RS10050	NA	A1S_1589	KZA74_10315	320.172	-0.40685	-0.179097	-3.34936	0.973209	0.979374	1.08642e-10	1319.94	2.52265	3.19642	6.63687	0.00239055	3.04814e-05	1.21321e-22
WT ddrR umuDAb	KZA74_10325	2,171,775..2,171,969	195	<=	KZA74_10325	NA	ACX60_RS10060	NA	NA	KZA74_10325	58.3044	-0.393015	-0.346883	-4.35484	0.973209	0.954298	1.27162e-08	194.68	2.42575	3.11445	6.71755	0.00737553	0.000154044	1.11533e-18
WT ddrR umuDAb	KZA74_10330	2,171,979..2,172,461	483	<=	terminase small subunit	NA	ACX60_RS10065	NA	A1S_3697	KZA74_10330	92.9728	-0.764243	-0.176814	-4.07142	0.973209	0.983857	2.36174e-12	354.293	2.34287	3.04067	6.99343	0.00433686	4.80652e-05	6.93579e-25
WT ddrR umuDAb	KZA74_10335	2,172,586..2,172,882	297	<=	EsvK1, HNH endonuclease	NA	ACX60_RS10070	NA	A1S_1586	KZA74_10335	97.4063	-0.0100346	0.00197902	-4.26977	0.999942	1	2.40411e-12	681.793	3.97599	4.40125	7.61027	2.66924e-07	8.36344e-09	6.93579e-25
WT ddrR umuDAb	KZA74_10340	2,172,812..2,173,102	291	<=	KZA74_10340	NA	ACX60_RS10075	NA	NA	KZA74_10340	65.7167	0.41106	0.343634	-5.0171	0.973209	0.950588	1.65373e-10	248.492	2.78335	3.45471	7.71236	0.00160412	2.39582e-05	1.01583e-20
WT ddrR umuDAb	KZA74_10345	2,173,080..2,173,343	264	<=	KZA74_10345	NA	ACX60_RS10080	NA	A1S_3696	KZA74_10345	18.1362	-0.0853868	0.208589	-5.25704	0.991879	0.990942	2.87584e-06	142.702	3.87605	4.48218	8.95958	0.000945276	5.44655e-05	1.73563e-12
WT ddrR umuDAb	KZA74_10350	2,173,336..2,173,518	183	<=	KZA74_10350	NA	ACX60_RS10085	NA	A1S_3695	KZA74_10350	17.8159	-0.593592	-0.0732087	-7.27203	0.973209	0.996962	5.03791e-07	71.6579	2.43351	3.49356	9.40245	0.0421319	0.00039859	7.39532e-10
WT ddrR umuDAb	KZA74_10355	2,173,508..2,174,038	531	<=	KZA74_10355	NA	ACX60_RS10090	NA	A1S_3694	KZA74_10355	65.7352	-0.343209	-0.275347	-5.1333	0.973457	0.968227	4.68226e-12	512.751	3.28891	4.48481	9.25371	0.000208073	7.17066e-08	1.75664e-28
WT ddrR umuDAb	KZA74_10360	2,174,054..2,174,452	399	<=	KZA74_10360	NA	ACX60_RS10095	NA	A1S_3693	KZA74_10360	96.8612	-0.623382	0.0802393	-9.59867	0.973209	0.996962	8.46609e-11	605.219	3.24287	4.25015	12.5044	0.0184839	0.000423085	9.09984e-15
WT ddrR umuDAb	KZA74_10370	2,175,289..2,175,459	171	<=	KZA74_10370	NA	ACX60_RS10105	NA	NA	KZA74_10370	42.7618	0.554619	0.868186	-1.59718	0.973209	0.837046	0.0124481	122.421	2.18654	1.87535	5.42426	0.000897543	0.00766552	5.80805e-23
WT ddrR umuDAb	KZA74_10375	2,175,477..2,175,839	363	<=	PRKR-interacting protein 1	NA	ACX60_RS10110	NA	A1S_3690	KZA74_10375	114.1	0.0409495	0.00514632	-1.05553	0.991879	0.997921	0.00207059	250.86	1.5621	2.00354	3.87297	0.00290469	3.52392e-05	2.92105e-20
WT ddrR umuDAb	KZA74_10385	2,176,672..2,177,169	498	<=	antitermination protein	NA	ACX60_RS10120	NA	A1S_3688	KZA74_10385	125.731	-0.524661	-0.163573	-3.19113	0.973209	0.979374	3.62097e-11	427.556	2.15705	3.11199	5.8006	0.00317266	1.88171e-06	3.29924e-22
WT ddrR umuDAb	KZA74_10425	2,182,014..2,182,451	438	=>	KZA74_10425	NA	NA	NA	NA	KZA74_10425	58.7911	0.365383	0.504469	-2.30768	0.973209	0.837046	2.19561e-06	1445.59	4.19978	5.88614	9.23595	5.77386e-07	4.05895e-12	4.46861e-33
WT ddrR umuDAb	KZA74_10430	2,182,444..2,182,716	273	=>	KZA74_10430	NA	NA	NA	NA	KZA74_10430	58.7238	-0.76807	-0.483229	-4.30552	0.973209	0.839664	2.40727e-13	1083.63	3.12967	5.78226	10.024	0.000650543	5.8351e-12	2.23089e-35
WT ddrR umuDAb	KZA74_10435	2,182,938..2,183,351	414	=>	helix-turn-helix domain-containing protein		ACX60_RS10160	NA	A1S_3686	KZA74_10435	100.717	-0.621493	-0.334457	-2.98531	0.973209	0.93164	1.33231e-07	1593.65	3.02825	5.49348	8.63511	0.00169803	1.32759e-10	1.78625e-27
WT ddrR umuDAb	KZA74_10440	2,183,574..2,183,837	264	=>	KZA74_10440	NA	ACX60_RS10175	NA	A1S_3685	KZA74_10440	62.4962	0.580134	0.390342	-2.59279	0.973209	0.883051	1.42003e-06	431.138	2.46218	4.07836	7.64471	0.00476602	5.31596e-08	1.35551e-27
WT ddrR umuDAb	KZA74_10445	2,183,849..2,184,379	531	=>	DUF551 domain-containing protein	rlmD	ACX60_RS10180	NA	A1S_1581	KZA74_10445	154.384	-0.695275	-0.164568	-3.45635	0.973209	0.98051	3.20954e-12	1182.24	2.78007	4.68919	7.30281	0.0016046	2.15797e-09	1.65397e-23
WT ddrR umuDAb	KZA74_10450	2,184,383..2,184,865	483	=>	class I SAM-dependent methyltransferase	NA	ACX60_RS10185	NA	A1S_3684	KZA74_10450	155.98	0.0831948	-0.177542	-4.00077	0.988413	0.973225	6.2573e-18	755.567	2.25394	4.31265	7.07543	0.00622371	7.54337e-10	1.28398e-26
WT ddrR umuDAb	KZA74_10455	2,184,862..2,185,131	270	=>	KZA74_10455	NA	ACX60_RS10190	NA	A1S_3683	KZA74_10455	83.4333	-0.0821156	0.00799301	-3.71959	0.988064	0.997921	8.72108e-20	491.974	2.89762	4.51743	6.72684	1.33143e-05	4.95441e-12	2.5286e-27
WT ddrR umuDAb	KZA74_10460	2,185,124..2,185,375	252	=>	KZA74_10460	NA	NA	NA	NA	KZA74_10460	143.061	-0.12581	0.091113	-4.27145	0.978912	0.993335	5.17857e-22	526.025	2.44604	3.44682	6.72126	6.23297e-05	2.62943e-09	7.42922e-33
WT ddrR umuDAb	KZA74_12630	2,640,384..2,641,589	1206	=>	integrase arm-type DNA-binding domain-containingprotein	NA	ACX60_RS12345	NA	A1S_1175	KZA74_12630	193.998	-0.145019	0.158466	-1.46555	0.978912	0.98051	0.00236034	461.661	3.09457	1.75079	2.85861	6.84022e-07	0.0267753	4.21924e-06
WT ddrR umuDAb	KZA74_12660	2,646,082..2,647,014	933	=>	IS5 family transposase ISAha3	NA	ACX60_RS12375	NA	A1S_1172	KZA74_12660	326.809	-0.439069	-0.122556	-0.817204	0.973209	0.992223	0.122356	812.891	3.12707	2.17733	2.08974	6.6591e-06	0.00694519	0.00753085
WT ddrR umuDAb	KZA74_12665	2,647,120..2,647,662	543	<=	N-acetylmuramidase	NA	ACX60_RS12380	NA	A1S_1171	KZA74_12665	140.146	-0.000408457	0.0429999	-5.8159	0.999942	0.996962	3.07363e-15	515.175	3.54122	2.62807	8.03132	9.17963e-07	0.000926278	8.47176e-28
WT ddrR umuDAb	KZA74_12670	2,647,705..2,648,094	390	<=	KZA74_12670	NA	ACX60_RS12385	NA	A1S_3621	KZA74_12670	126.053	0.143413	0.298664	-8.09594	0.988413	0.975973	1.45162e-12	374.408	3.46577	2.27238	9.28866	1.45203e-05	0.0185292	3.71327e-17
WT ddrR umuDAb	KZA74_12675	2,648,158..2,650,647	2490	<=	KZA74_12675	NA	ACX60_RS12390	ABUW_2661	A1S_1169	KZA74_12675	847.629	-0.0409177	0.0320396	-3.43696	0.991879	0.996962	7.61221e-10	2862.66	3.56071	2.46736	5.22804	1.18408e-06	0.00313754	1.56945e-14
WT ddrR umuDAb	KZA74_12680	2,650,648..2,651,070	423	<=	C40 family peptidase	NA	ACX60_RS12395	NA	NA	KZA74_12680	114.638	-0.380202	-0.336698	-2.91552	0.973209	0.883051	1.91742e-10	401.843	3.46386	2.77034	4.30308	2.98965e-07	0.000111602	2.87149e-11
WT ddrR umuDAb	KZA74_12685	2,651,071..2,651,841	771	<=	KZA74_12685	NA	ACX60_RS12400	NA	A1S_3620	KZA74_12685	171.03	-0.0611408	0.0384169	-2.69346	0.991711	0.996962	2.72953e-08	667.622	3.68235	2.78268	5.07866	1.13014e-08	3.74108e-05	3.54775e-17
WT ddrR umuDAb	KZA74_12690	2,651,845..2,653,647	1803	<=	KZA74_12690	NA	ACX60_RS12405	NA	A1S_1168	KZA74_12690	512.611	0.151548	0.209659	-4.55909	0.982624	0.97666	1.0492e-15	1772.2	3.63166	2.30652	6.85911	1.33514e-07	0.00358306	5.49969e-27
WT ddrR umuDAb	KZA74_12695	2,653,704..2,654,561	858	<=	DUF2163 domain-containing protein	NA	ACX60_RS12410	NA	A1S_1167	KZA74_12695	227.455	-0.357153	-0.228422	-2.35265	0.973209	0.968129	1.44537e-05	1129.46	3.80979	3.13698	5.4289	1.30666e-08	5.14639e-06	2.20109e-18
WT ddrR umuDAb	KZA74_12700	2,654,558..2,655,211	654	<=	DUF2460 domain-containing protein	NA	ACX60_RS12415	NA	A1S_1166	KZA74_12700	189.967	0.03796	-0.0565845	-3.55806	0.991879	0.996962	4.07182e-10	955.089	3.96009	3.17686	6.66311	6.9949e-09	6.64468e-06	1.48714e-25
WT ddrR umuDAb	KZA74_12705	2,655,222..2,658,260	3039	<=	phage tail protein	NA	ACX60_RS12420	NA	A1S_1164	KZA74_12705	806.118	-0.384113	-0.0974797	-3.9494	0.973209	0.996962	7.67298e-10	4034.22	3.83792	3.00936	6.9402	1.82945e-06	0.000538988	3.35717e-21
WT ddrR umuDAb	KZA74_12715	2,658,926..2,659,153	228	<=	KZA74_12715	NA	ACX60_RS12430	NA	A1S_1163	KZA74_12715	95.5811	-0.143371	-0.309505	-2.99657	0.982385	0.937482	2.26818e-08	1028.72	4.71599	5.09787	6.93097	1.63355e-08	8.08428e-10	6.1928e-19
WT ddrR umuDAb	KZA74_12720	2,659,189..2,659,503	315	<=	KZA74_12720	NA	ACX60_RS12435	NA	A1S_3618	KZA74_12720	57.6107	-0.379722	-0.636239	-3.00545	0.973209	0.837046	1.6423e-06	1130.15	5.06353	5.97356	8.40234	3.85146e-08	6.56745e-11	1.21321e-22
WT ddrR umuDAb	KZA74_12725	2,659,510..2,660,277	768	<=	KZA74_12725	NA	ACX60_RS12440	NA	A1S_1162	KZA74_12725	218.551	-0.259815	-0.0346167	-4.73847	0.97575	0.996962	1.1419e-11	2460.26	4.5996	4.68365	9.32481	8.41556e-07	5.79271e-07	4.07946e-27
WT ddrR umuDAb	KZA74_12730	2,660,340..2,660,783	444	<=	KZA74_12730	NA	ACX60_RS12445	NA	A1S_1161	KZA74_12730	138.972	-0.665627	-0.300412	-4.28367	0.973209	0.948788	1.53091e-12	1728.87	4.60151	4.84796	8.82899	7.55543e-08	1.26411e-08	2.36143e-28
WT ddrR umuDAb	KZA74_12735	2,660,776..2,661,258	483	<=	KZA74_12735	NA	ACX60_RS12450	NA	A1S_1160	KZA74_12735	151.903	-0.666525	-0.134485	-4.46184	0.973209	0.993407	2.46706e-12	1563.96	4.53474	4.50855	8.53101	2.48421e-07	3.19313e-07	2.54161e-25
WT ddrR umuDAb	KZA74_12740	2,661,266..2,661,457	192	<=	KZA74_12740	NA	ACX60_RS12455	NA	NA	KZA74_12740	27.5307	-0.611063	-0.111901	-3.41094	0.973209	0.996962	6.98945e-07	522.308	5.3815	5.70223	8.02635	1.80444e-10	1.53124e-11	2.11022e-22
WT ddrR umuDAb	KZA74_12745	2,661,467..2,661,850	384	<=	DUF4054 domain-containing protein	NA	ACX60_RS12460	NA	A1S_1159	KZA74_12745	104.807	-0.573508	-0.358516	-4.12779	0.973209	0.890022	1.99475e-15	1463.67	4.96409	5.19375	8.49122	2.69157e-10	4.09964e-11	5.09803e-30
WT ddrR umuDAb	KZA74_12750	2,661,860..2,662,243	384	<=	KZA74_12750	NA	ACX60_RS12465	NA	A1S_1158	KZA74_12750	95.6559	-1.04705	-0.0630761	-4.35168	0.973209	0.996962	1.17392e-10	1093.14	4.48602	4.39594	8.82983	1.98552e-07	3.9155e-07	1.78625e-27
WT ddrR umuDAb	KZA74_12755	2,662,258..2,663,232	975	<=	DUF2184 domain-containing protein	NA	ACX60_RS12470	NA	A1S_1157	KZA74_12755	280.415	-0.117655	0.0197166	-2.61562	0.984383	0.996962	6.67438e-09	3234.95	4.78695	4.58725	7.52939	1.9079e-09	8.34054e-09	1.33573e-24
WT ddrR umuDAb	KZA74_12760	2,663,238..2,663,708	471	<=	KZA74_12760	NA	ACX60_RS12475	ABUW_2663	A1S_1156	KZA74_12760	203.688	-0.594346	-0.281244	-4.2491	0.973209	0.94447	3.60791e-16	2115.57	4.5953	4.52232	8.33	1.54667e-09	2.62943e-09	1.15613e-31
WT ddrR umuDAb	KZA74_12765	2,663,722..2,664,924	1203	<=	DUF2213 domain-containing protein	K09960	ACX60_RS12480	ABUW_2664	A1S_1155	KZA74_12765	422.832	-0.597067	-0.196854	-4.86324	0.973209	0.98624	1.75983e-14	3320.14	4.14694	3.82397	8.78962	8.48015e-07	9.21482e-06	6.2524e-30
WT ddrR umuDAb	KZA74_12770	2,665,167..2,665,466	300	<=	KZA74_12770	NA	ACX60_RS12490	NA	A1S_3616	KZA74_12770	75.4109	-0.212004	0.324722	-3.84053	0.978912	0.956633	1.07195e-07	328.098	3.7605	2.21577	7.05607	1.11165e-07	0.00888896	4.46535e-25
WT ddrR umuDAb	KZA74_12780	2,666,078..2,666,890	813	<=	minor capsid protein	NA	ACX60_RS12500	ABUW_2667	A1S_1154	KZA74_12780	255.571	-0.674745	-0.0957308	-4.87071	0.973209	0.996962	1.20169e-15	1136.72	3.83146	2.90353	6.48309	1.99797e-07	0.000239213	1.11157e-20
WT ddrR umuDAb	KZA74_12785	2,666,835..2,668,169	1335	<=	DUF1073 domain-containing protein	K09961	ACX60_RS12505	ABUW_2668	A1S_1153	KZA74_12785	366.132	-0.15617	-0.195488	-3.25873	0.983996	0.982425	3.29956e-08	1852.96	3.92832	3.13645	6.3083	6.953e-08	3.82922e-05	6.85001e-21
WT ddrR umuDAb	KZA74_12790	ND	ND	ND	terL, phage terminase large subunit	NA	ACX60_RS12510	ABUW_2669	A1S_1152	KZA74_12790	520.993	-0.245825	0.0558457	-5.68153	0.97575	0.996962	9.88236e-21	2165.06	3.79991	2.51498	8.08425	3.81148e-07	0.00334853	5.66542e-31
WT ddrR umuDAb	KZA74_12795	2,669,682..2,670,158	477	<=	DUF2280 domain-containing protein	NA	ACX60_RS12515	ABUW_2670	A1S_1151	KZA74_12795	186.801	0.34001	0.310345	-6.4691	0.97575	0.961029	3.00712e-16	678.258	3.76303	2.39891	8.96066	1.99797e-07	0.00416051	1.33606e-31
WT ddrR umuDAb	KZA74_12800	2,670,217..2,670,858	642	<=	KZA74_12800	NA	ACX60_RS12520	NA	A1S_1150	KZA74_12800	215.103	-0.277165	-0.248388	-4.75537	0.97575	0.966855	1.31581e-15	836.71	3.61639	2.56761	6.92292	6.20812e-08	0.000407696	8.58228e-28
WT ddrR umuDAb	KZA74_12805	2,670,827..2,671,255	429	<=	KZA74_12805	NA	ACX60_RS12525	NA	A1S_1149	KZA74_12805	22.5875	-0.0880049	0.338467	-4.66128	0.991879	0.956275	3.6047e-07	111.164	3.99762	2.22698	8.0462	4.27287e-08	0.0124686	1.76626e-20
WT ddrR umuDAb	KZA74_12810	2,671,268..2,671,459	192	<=	KZA74_12810	NA	ACX60_RS12530	NA	NA	KZA74_12810	24.9044	0.246082	-0.224944	-3.43788	0.97575	0.976892	8.1845e-07	81.183	3.36401	2.3739	5.83456	5.58297e-07	0.00212012	4.49083e-17
WT ddrR umuDAb	KZA74_12815	2,671,537..2,671,749	213	<=	KZA74_12815	NA	ACX60_RS12535	NA	NA	KZA74_12815	76.565	-0.0429688	0.0902055	1.20143	0.991879	0.996962	0.0243581	155.614	3.24445	1.56401	1.70618	1.80978e-08	0.0437322	0.00837738
WT ddrR umuDAb	KZA74_12820	2,671,921..2,672,655	735	<=	KZA74_12820	NA	ACX60_RS12540	NA	A1S_3614	KZA74_12820	218.619	0.357811	0.567215	-3.05661	0.973209	0.837046	2.96581e-10	1448.41	4.25713	3.51905	7.41825	2.8916e-13	1.80855e-09	8.72172e-42
WT ddrR umuDAb	KZA74_12825	2,672,666..2,673,067	402	<=	endonuclease domain-containing protein	NA	ACX60_RS12545	ABUW_1280	A1S_1148	KZA74_12825	98.4124	-0.298586	-0.149997	-5.87869	0.97575	0.993335	3.13721e-15	577.296	3.73349	3.97368	8.73936	3.02419e-07	4.59795e-08	5.07922e-30
WT ddrR umuDAb	KZA74_12830	2,673,067..2,673,282	216	<=	KZA74_12830	NA	ACX60_RS12550	NA	A1S_3613	KZA74_12830	43.2123	0.450745	0.623609	-5.7945	0.973209	0.883051	7.89172e-08	225.954	4.14965	3.56568	8.59047	3.18024e-07	1.91242e-05	1.67768e-17
WT ddrR umuDAb	KZA74_12835	2,673,275..2,673,676	402	<=	HNH endonuclease	NA	ACX60_RS12555	NA	A1S_3612	KZA74_12835	178.413	0.0618744	0.181724	-6.22684	0.991879	0.990942	1.62315e-17	1156.81	4.0077	4.13757	9.43431	7.55543e-08	2.63356e-08	6.07601e-35
WT ddrR umuDAb	KZA74_12840	2,673,673..2,674,080	408	<=	KZA74_12840	NA	ACX60_RS12560	NA	A1S_3611	KZA74_12840	82.2709	0.17928	0.294008	-4.98216	0.97967	0.953069	3.33957e-13	825.992	4.2838	4.57342	9.77459	2.78674e-08	2.15797e-09	4.78745e-36
WT ddrR umuDAb	KZA74_12845	2,674,077..2,674,826	750	<=	KZA74_12845	NA	ACX60_RS12565	NA	A1S_3610	KZA74_12845	238.019	-0.374393	-0.0183434	-5.3018	0.973209	0.997921	5.91692e-16	1958.18	3.67486	4.22469	9.64558	6.49434e-06	1.29547e-07	2.7518e-37
WT ddrR umuDAb	KZA74_12850	2,674,819..2,675,769	951	<=	YdaU family protein	NA	ACX60_RS12570	NA	A1S_3609	KZA74_12850	98.2712	-1.02051	-0.155165	-4.01497	0.973209	0.991179	2.116e-10	1668.69	4.02043	5.05869	9.67717	8.41556e-07	3.24247e-10	5.02847e-37
WT ddrR umuDAb	KZA74_12855	2,675,766..2,676,680	915	<=	DNA cytosine methyltransferase	DNMT1, dcm	ACX60_RS12575	NA	A1S_1146	KZA74_12855	478.253	-0.680039	-0.1575	-6.60698	0.973209	0.993335	2.93051e-21	5756.31	4.10361	5.24276	10.8696	4.54413e-05	5.78476e-08	4.72108e-33
WT ddrR umuDAb	KZA74_12860	2,676,677..2,676,964	288	<=	KZA74_12860	NA	ACX60_RS12580	NA	A1S_3608	KZA74_12860	41.1936	-0.777246	-0.273391	-5.32489	0.973209	0.956275	5.27017e-13	776.319	4.08276	5.70106	10.8045	1.6748e-06	1.42463e-11	8.55656e-34
WT ddrR umuDAb	KZA74_12865	2,677,015..2,677,515	501	<=	XRE family transcriptional regulator	NA	ACX60_RS12585	NA	A1S_3607	KZA74_12865	115.767	-0.151447	0.0180903	-4.95441	0.986689	0.997921	3.35328e-13	1768.51	4.31161	5.43895	10.2852	7.17112e-07	2.24421e-10	3.33204e-35
WT ddrR umuDAb	KZA74_12870	2,677,570..2,677,818	249	<=	helix-turn-helix domain-containing protein	NA	ACX60_RS12590	NA	A1S_1145	KZA74_12870	49.354	0.143667	-0.0665415	-5.44341	0.986689	0.996962	4.89576e-12	848.148	4.44684	5.51615	11.2698	3.11668e-08	5.8351e-12	2.41391e-37
WT ddrR umuDAb	KZA74_12880	2,678,840..2,679,280	441	=>	KZA74_12880	NA	ACX60_RS12600	NA	A1S_1143	KZA74_12880	87.8618	-0.106197	-0.294827	-3.73975	0.9888	0.968227	2.19722e-07	1014.99	3.04242	3.72778	9.55222	0.000226685	2.26418e-06	2.6165e-39
WT ddrR umuDAb	KZA74_12885	2,679,283..2,679,606	324	=>	KZA74_12885	NA	ACX60_RS12605	NA	NA	KZA74_12885	72.9831	0.188684	0.0508363	-5.09706	0.986689	0.996962	2.25972e-09	707.152	3.42507	4.2301	10.4275	5.57365e-05	2.2179e-07	1.49924e-36
WT ddrR umuDAb	KZA74_12890	2,679,618..2,680,385	768	=>	KZA74_12890	NA	ACX60_RS12610	NA	A1S_3606	KZA74_12890	191.518	0.0791724	0.00459454	-4.84476	0.9888	1	1.30833e-16	2259.28	3.56213	4.59685	10.4283	3.68323e-06	9.70237e-10	6.29937e-47
WT ddrR umuDAb	KZA74_12895	2,680,400..2,681,359	960	=>	KZA74_12895	NA	ACX60_RS12615	NA	A1S_3605	KZA74_12895	226.416	0.215085	0.194154	-3.68576	0.97575	0.976892	1.34038e-11	3103.52	3.72148	4.40577	9.82135	5.18314e-07	1.80855e-09	1.36669e-46
WT ddrR umuDAb	KZA74_12900	2,681,361..2,681,612	252	=>	KZA74_12900	NA	ACX60_RS12620	NA	NA	KZA74_12900	28.2735	-1.05547	0.029143	-4.88267	0.973209	0.997921	2.31096e-08	272.552	3.28334	3.6753	9.86958	6.11821e-05	4.51998e-06	8.34838e-31
WT ddrR umuDAb	KZA74_12905	2,681,613..2,682,020	408	=>	KZA74_12905	NA	ACX60_RS12625	NA	NA	KZA74_12905	21.6904	-0.255247	0.612176	-2.995	0.97575	0.839664	4.90895e-05	238.792	3.66807	3.49869	8.78371	2.9779e-07	8.66861e-07	2.67994e-35
WT ddrR umuDAb	KZA74_12910	2,682,017..2,682,301	285	=>	KZA74_12910	NA	ACX60_RS12630	NA	NA	KZA74_12910	49.7927	0.338319	0.484144	-4.02915	0.973209	0.87558	6.15786e-09	283.498	3.40548	3.23497	8.43237	5.57215e-08	2.34679e-07	1.98e-38
WT ddrR umuDAb	KZA74_12915	2,682,305..2,682,562	258	=>	KZA74_12915	NA	ACX60_RS12635	NA	NA	KZA74_12915	47.7937	-0.0192114	0.168851	-4.0199	0.997643	0.990942	1.73928e-08	389.968	3.73019	4.26517	8.50533	1.20975e-07	8.87175e-10	1.4419e-33
WT ddrR umuDAb	KZA74_12920	2,682,564..2,682,779	216	=>	KZA74_12920	NA	ACX60_RS12640	NA	NA	KZA74_12920	106.374	0.479457	0.256877	-3.67726	0.973209	0.956275	1.24253e-10	630.052	3.65303	3.5602	8.01955	1.90795e-10	5.06143e-10	1.36669e-46
WT ddrR umuDAb	KZA74_16400	3,445,920..3,446,525	606	<=	glutathione S-transferase family protein	GST, gst	ACX60_RS16075	ABUW_3473	A1S_0408	KZA74_16400	11448.6	5.5781	-0.333324	-1.43157	NA	NA	NA	51745.2	6.25299	7.51675	8.95606	6.53974e-06	2.9871e-08	2.2826e-12
WT umuDAb	KZA74_07545	1,606,846..1,607,079	234	<=	KZA74_07545	NA	ACX60_RS07510	ABUW_1284	NA	KZA74_07545	141.661	0.763554	0.72127	1.36222	0.190625	0.837046	2.14013e-07	202.984	3.06224	1.39254	-0.134461	3.66713e-27	7.46443e-06	0.883673
WT umuDAb	KZA74_12775	2,665,555..2,666,106	552	=>	KZA74_12775	NA	ACX60_RS12495	NA	A1S_3615	KZA74_12775	121.897	0.398251	0.729581	-0.192261	0.973209	0.837046	0.681365	365.425	4.10776	2.47149	0.96603	3.14164e-17	1.13323e-06	0.18502
WT umuDAb	KZA74_12875	2,677,821..2,678,612	792	=>	helix-turn-helix domain-containing protein	NA	ACX60_RS12595	NA	A1S_1144	KZA74_12875	319.276	0.39047	0.341139	0.455028	0.973209	0.837046	0.138379	521.871	2.77267	1.43775	1.09885	7.63941e-10	0.00812798	0.0583416
WT umuDAb	KZA74_16395	3,445,183..3,445,860	678	=>	DUF1345 domain-containing protein	NA	ACX60_RS16070	ABUW_3472	A1S_0409	KZA74_16395	355.045	1.16346	0.35064	0.0277528	0.288491	0.883051	0.959912	437.189	1.43096	1.74558	0.0223306	0.0184207	0.00145105	0.993854
WT umuDAb	KZA74_18775	40,567..40,851	285	=>	TetR/AcrR family transcriptional regulator	NA	NA	NA	A1S_0625	KZA74_18775	104.938	0.891361	0.313165	1.2041	0.202902	0.837894	0.000167202	107.934	0.817075	1.10492	0.0405875	0.0194502	0.000270316	0.977307
