# Supplementary material for: DNA damage response coregulator ddrR affects many cellular pathways and processes in Acinetobacter baumannii 17978
Source: Front Cell Infect Microbiol. 2024 Jan 11;13:1324091. doi: 10.3389/fcimb.2023.1324091 (PMC10808703; doi:10.3389/fcimb.2023.1324091)
Supplement: Supplementary file 8 [file Table_7.xlsx]

## Sheet: All basal expression
Location ID	ENSEMBL GENE	location bp	size	direction	ENSEMBL GENE	gene	RefSeq locus	AB5075-UW ortholog	17978 A1S_ locus	UN gene ID	baseMean	recA log(2)FC	umuDAb l2FC	ddrR l2FC	recA padj	umuDAb padj	ddrR padj
pAB3	KZA74_18970	ND	ND	ND	umuD, A1S_0636	NA	NA	NA	A1S_0636	KZA74_18970	1470.71	0.150739	3.98745	4.89293	0.978617	2.76014e-20	1.56796e-32
chromosome	KZA74_11465	2,384,217..2,384,453	237	=>	ddrR, A1S_1388	ddrR	ACX60_RS11180	ABUW_2432	A1S_1388	KZA74_11465	4095.47	-0.00157493	6.00172	4.40523	0.999942	2.2512e-18	3.69176e-11
chromosome	umuD	2,383,323..2,383,934	612	<=	umuDAb, A1S_1389	umuDAb	ACX60_RS11175	ABUW_2431	A1S_1389	KZA74_11460	1987.79	-0.299824	-2.48111	4.67936	0.973209	1.85293e-11	4.39837e-51
pAB3	KZA74_18975	86,100..86,102	3	==	umuC, A1S_0637	NA	NA	NA	A1S_0637	KZA74_18975	1543.34	0.569971	2.39778	3.42457	0.973209	3.26819e-08	2.90313e-19
chromosome	KZA74_12645	ND	ND	ND	umuD, A1S_1174	umuD (P3)	ACX60_RS12360	NA	A1S_1174	KZA74_12645	1083.93	0.100153	2.66893	5.201	0.987406	3.26819e-08	3.68594e-35
chromosome	KZA74_07790	1,645,052..1,646,380	1329	<=	Y-family DNA polymerase, umuC, A1S_2008	umuC	ACX60_RS07745	ABUW_1699	A1S_2008	KZA74_07790	1715.16	-0.13056	2.22212	3.89634	0.986689	0.00360508	5.50127e-14
chromosome	frr	1,682,963..1,683,517	555	=>	frr, ribosome recycling factor	frr, MRRF, RRF	ACX60_RS07930	ABUW_1737	A1S_1974	KZA74_07980	893.458	-2.31109	-1.89723	1.66704	0.0030344	0.18519	0.00403571
chromosome	KZA74_02935	596,704..596,790	87	=>	trnL	NA	NA	NA	A1S_2909	KZA74_02935	6753.66	7.94063	3.88559	1.20939	4.57314e-09	0.290558	0.358018
chromosome	KZA74_02285	468,719..468,809	91	=>	tRNA-Ser	trnS	NA	NA	A1S_3020	KZA74_02285	3049.15	6.70768	2.99376	1.26334	2.12234e-08	0.837046	0.274152
chromosome	KZA74_15125	3,175,035..3,175,111	77	<=	tRNA-Arg	trnR	NA	NA	A1S_0715	KZA74_15125	1331.81	4.40874	1.06293	1.73219	5.05867e-08	0.837046	0.0206166
chromosome	KZA74_04165	868,236..868,309	74	<=	tRNA-Cys	trnC	NA	NA	A1S_2675	KZA74_04165	2071.24	6.46337	2.61901	-2.56856	1.63716e-07	0.837046	0.0254275
chromosome	KZA74_06010	1,291,757..1,291,833	77	<=	tRNA-Arg	NA	NA	NA	A1S_2310	KZA74_06010	195.406	3.84396	1.26209	-2.73217	2.29252e-06	0.837046	0.000271506
chromosome	KZA74_15120	3,174,926..3,175,001	76	<=	tRNA-His	trnH	NA	NA	A1S_0716	KZA74_15120	1620.48	5.18942	1.30088	-2.28176	2.87614e-06	0.837046	0.0226651
chromosome	KZA74_15295	ND	ND	ND	rrf, 5S ribosomal RNA	rrf	NA	NA	A1S_r	KZA74_15295	149.27	4.7275	0.945329	-7.72701	2.87614e-06	0.837046	4.10323e-07
chromosome	KZA74_12370	2,583,035..2,583,111	77	<=	trnM, tRNA-Met	trnM	ACX60_RS12090	ABUW_2698	A1S_1223	KZA74_12370	796.115	4.01134	0.937075	6.52309	3.05355e-06	0.837046	4.75649e-19
chromosome	KZA74_05505	1,169,732..1,169,808	77	=>	tRNA-Val	NA	NA	NA	A1S_2415	KZA74_05505	295.949	4.12778	1.02049	-2.27406	3.19628e-05	0.837046	0.00936701
chromosome	KZA74_01075	237,924..237,999	76	<=	trnT	trnT	NA	NA	A1S_3249	KZA74_01075	242.755	3.51153	1.17659	-2.09884	0.000101966	0.837046	0.00698458
chromosome	ffs	1,694,353..1,694,449	97	=>	ffs, signal recognition particle sRNA small type	ffs	NA	NA	NA	KZA74_08035	8866.15	5.68252	2.36348	-1.0341	0.000405749	0.837046	0.458794
chromosome	KZA74_01195	256,122..256,211	90	<=	trnS, tRNA-Ser	trnS	NA	NA	A1S_3226	KZA74_01195	528.675	4.76452	1.76081	-2.41851	0.000500043	0.837046	0.0346101
chromosome	KZA74_14740	3,083,498..3,084,223	726	<=	KZA74_14740	NA	ACX60_RS14425	ABUW_3139	A1S_0787	KZA74_14740	551.8	-1.4858	-0.776785	-0.503608	0.0030344	0.837046	0.195757
chromosome	KZA74_13075	2,715,503..2,716,954	1452	=>	aldehyde dehydrogenase	vdh	ACX60_RS12795	ABUW_2779	A1S_1110	KZA74_13075	1180.42	-1.29028	-0.540462	-1.83933	0.00359753	0.837046	8.61707e-09
chromosome	csuA	1,389,079..1,389,627	549	=>	csuA, Csu fimbrial biogenesis protein CsuA	csuA	ACX60_RS06485	ABUW_1488	A1S_2217	KZA74_06515	164.461	3.26174	0.966734	-2.64819	0.00485771	0.837046	0.00286972
chromosome	KZA74_05845	1,254,403..1,254,478	76	<=	tRNA-Asn	NA	NA	NA	A1S_2346	KZA74_05845	379.619	5.14618	1.54062	-2.26635	0.00552393	0.837046	0.115241
chromosome	KZA74_02615	ND	ND	ND	rrf, 5S ribosomal RNA	rrf	NA	NA	A1S_r	KZA74_02615	5.84511	5.74735	1.88714	-1.9963	0.00561792	0.837046	0.342231
chromosome	KZA74_10595	2,208,152..2,208,580	429	<=	biopolymer transporter ExbD	exbD	ACX60_RS10325	ABUW_2260	A1S_1554	KZA74_10595	168.603	-0.998478	-0.67678	0.361192	0.00827426	0.837046	0.160183
chromosome	KZA74_00800	175,557..175,829	273	=>	KZA74_00800	NA	ACX60_RS00820	ABUW_0157	A1S_3897	KZA74_00800	166.091	1.16644	0.635667	0.21935	0.0094049	0.837046	0.522872
chromosome	catA	1,822,945..1,823,865	921	<=	catA, catechol 1,2-dioxygenase	catA	ACX60_RS08595	ABUW_1875	A1S_1845	KZA74_08655	2036.13	-3.33211	-1.45024	-5.05724	0.0189303	0.837046	7.54702e-08
chromosome	KZA74_08665	1,824,341..1,825,447	1107	<=	muconate/chloromuconate family cycloisomerase	catB	ACX60_RS08605	ABUW_1877	A1S_1843	KZA74_08665	1355.91	-3.31275	-1.50281	-5.91886	0.0304445	0.837046	9.63548e-10
chromosome	betB	2,939,866..2,941,338	1473	=>	betB, betaine-aldehyde dehydrogenase	betB, gbsA	ACX60_RS13740	ABUW_2971	A1S_0927	KZA74_14045	3132.66	-2.33898	-1.23895	-1.84598	0.0304445	0.837046	0.00936701
chromosome	KZA74_02315	472,928..473,620	693	<=	nitroreductase family protein	K07078	ACX60_RS02315	ABUW_0451	A1S_3042	KZA74_02315	165.087	1.47114	0.980011	-1.89839	0.0407482	0.837046	3.04763e-05
chromosome	KZA74_08640	ND	ND	<=	pcaF, 3-oxoadipyl-CoA thiolase	pcaF	ACX60_RS08580	ABUW_1872	A1S_1849	KZA74_08640	673.304	-2.19644	-1.04257	-3.47295	0.0512989	0.837046	2.48472e-07
chromosome	betI	2,939,250..2,939,873	624	=>	betI, transcriptional regulator BetI	betI	ACX60_RS13735	ABUW_2970	A1S_0928	KZA74_14040	2001.15	-2.79253	-1.02779	-1.56776	0.0512989	0.837046	0.0838224
chromosome	KZA74_14035	2,937,362..2,938,984	1623	<=	BCCT family transporter	betT, betS	ACX60_RS13730	ABUW_2969	A1S_0929	KZA74_14035	2753.91	-1.64726	-0.755814	-1.00277	0.0535777	0.837046	0.0610752
chromosome	catC	1,824,027..1,824,317	291	<=	catC, muconolactone Delta-isomerase	catC	ACX60_RS08600	ABUW_1876	A1S_1844	KZA74_08660	345.886	-3.8902	-1.69272	-5.14358	0.074147	0.837046	3.80799e-05
chromosome	KZA74_08435	1,775,210..1,775,881	672	=>	pcaA, 3-oxoacid CoA-transferase subunit A	pcaI, pcaA	ACX60_RS08375	ABUW_1831	A1S_1894	KZA74_08435	393.107	-1.60443	-0.529864	-3.26227	0.0859875	0.837046	2.28731e-10
chromosome	benA	2,593,152..2,594,534	1383	=>	benA	benA-xylX	ACX60_RS12150	ABUW_2710	A1S_1215	KZA74_12430	1131.5	-2.88796	-1.04865	-4.93054	0.0910248	0.837046	1.59267e-07
chromosome	KZA74_07170	1,535,532..1,536,089	558	=>	chorismate mutase	pheA1	ACX60_RS07140	ABUW_1638	A1S_2084	KZA74_07170	182.623	-0.841819	-0.535914	-0.889858	0.0931592	0.837046	0.000902174
chromosome	KZA74_08645	1,821,470..1,822,120	651	<=	pcaB, 3-oxoacid CoA-transferase subunit B	pcaJ, pcaB	ACX60_RS08585	ABUW_1873	NA	KZA74_08645	489.836	-2.42679	-1.07452	-4.76334	0.0931592	0.837046	1.97087e-09
chromosome	mfd	2,121,788..2,125,249	3462	<=	mfd, transcription-repair coupling factor	mfd	ACX60_RS09825	ABUW_2210	A1S_1623	KZA74_10090	1872.49	-0.614119	-0.420622	0.393295	0.0931592	0.837046	0.0607755
chromosome	betA	2,941,434..2,943,092	1659	=>	betA, choline dehydrogenase	betA, CHDH	ACX60_RS13745	ABUW_2972	A1S_0924	KZA74_14050	1981.83	-1.79566	-1.00228	-2.05538	0.0982241	0.837046	0.000727726
chromosome	KZA74_08450	1,777,780..1,779,135	1356	=>	3-carboxy-cis,cis-muconate cycloisomerase	pcaB	ACX60_RS08390	ABUW_1834	A1S_1890	KZA74_08450	777.243	-1.44496	-0.553001	-3.38159	0.101979	0.837046	1.8872e-12
chromosome	KZA74_03705	763,484..763,556	73	<=	tRNA-Arg	NA	NA	NA	NA	KZA74_03705	43.4007	1.58293	0.611363	-2.36277	0.106033	0.837046	5.3063e-05
chromosome	KZA74_03015	615,409..616,443	1035	=>	glycosyltransferase	gtrOC4	ACX60_RS03010	ABUW_0592	A1S_2899	KZA74_03015	694.354	-0.59111	-0.376781	0.147869	0.119212	0.837046	0.493525
chromosome	KZA74_08600	1,807,690..1,808,643	954	=>	PDR/VanB family oxidoreductase, Carnitine monooxygenase reductase subunit	yeaX	ACX60_RS08540	ABUW_1864	A1S_1857	KZA74_08600	769.115	-1.79014	-0.730293	-4.79855	0.119212	0.837046	3.02743e-15
chromosome	KZA74_02310	472,731..472,807	77	=>	tRNA-Arg	trnR	NA	NA	A1S_3015	KZA74_02310	39.0674	1.89398	0.990321	-1.88778	0.119938	0.837046	0.00770099
chromosome	KZA74_07385	1,582,894..1,583,922	1029	=>	alpha/beta hydrolase	menH	ACX60_RS07350	ABUW_1689	A1S_2047	KZA74_07385	535.562	-0.819296	-0.471071	0.136142	0.121592	0.837046	0.662385
chromosome	KZA74_08650	1,822,139..1,822,810	672	<=	pcaA, 3-oxoacid CoA-transferase subunit A	pcaI, pcaA	ACX60_RS08590	ABUW_1874	A1S_1846	KZA74_08650	469.513	-3.02192	-1.21685	-5.03239	0.138065	0.837046	1.98612e-06
chromosome	pqqC	1,968,004..1,968,762	759	<=	pqqC, pyrroloquinoline-quinone synthase PqqC	pqqC	NA	NA	NA	KZA74_09345	590.977	-0.711216	-0.348728	-0.0889769	0.138065	0.837046	0.749971
chromosome	KZA74_01965	416,027..417,874	1848	=>	deaD, DEAD/DEAH box helicase	deaD	ACX60_RS01970	ABUW_0381	A1S_3104	KZA74_01965	27413.6	-2.35141	-2.149	2.80328	0.159691	0.837046	0.00113494
chromosome	KZA74_17280	3,637,866..3,638,084	219	=>	KZA74_17280	NA	ACX60_RS16950	ABUW_3649	A1S_0224	KZA74_17280	165.151	0.902433	0.724587	1.24748	0.181706	0.837046	0.000100684
chromosome	uppS	1,683,523..1,684,275	753	=>	uppS, di-trans,poly-cis-decaprenylcistransferase	uppS	ACX60_RS07935	ABUW_1738	A1S_1973	KZA74_07985	789.467	-1.04262	-0.847	1.14172	0.189422	0.837046	0.00316269
chromosome	KZA74_07545	1,606,846..1,607,079	234	<=	KZA74_07545	NA	ACX60_RS07510	ABUW_1284	NA	KZA74_07545	141.661	0.763554	0.72127	1.36222	0.190625	0.837046	2.14013e-07
chromosome	ppk1	1,970,056..1,972,131	2076	<=	ppk1, polyphosphate kinase 1	ppk1	NA	NA	NA	KZA74_09360	1562.27	-0.963791	-0.445539	0.452026	0.198605	0.837046	0.237774
chromosome	KZA74_08595	1,806,918..1,807,655	738	=>	SDR family oxidoreductase	fabG	ACX60_RS08535	ABUW_1863	A1S_1858	KZA74_08595	950.764	-1.71573	-0.759391	-5.15909	0.202315	0.837046	4.57181e-16
chromosome	KZA74_06610	1,408,367..1,409,734	1368	=>	sorbosone dehydrogenase family protein	NA	ACX60_RS06580	ABUW_1521|ABUW_1902	A1S_2200	KZA74_06610	864.854	-0.696109	-0.640116	-1.05893	0.207134	0.837046	4.54137e-05
chromosome	KZA74_08605	1,808,689..1,809,645	957	=>	flavin reductase family protein	C1-hpah_1	ACX60_RS08545	ABUW_1865	A1S_1856	KZA74_08605	646.716	-1.44053	-0.606409	-3.79254	0.207134	0.837046	1.45162e-12
chromosome	KZA74_07850	1,660,607..1,661,095	489	=>	molybdenum cofactor biosynthesis protein MoaE	moaE, MOCS2B, moaE	ACX60_RS07800	ABUW_1711	A1S_1997	KZA74_07850	273.395	-0.731259	-0.464101	-0.47781	0.213674	0.837046	0.0868095
chromosome	KZA74_09665	2,035,245..2,036,780	1536	<=	2-oxo acid dehydrogenase subunit E2	DLAT, aceF, pdhC	ACX60_RS09400	ABUW_2129	A1S_1701	KZA74_09665	1885.69	-2.03011	-1.62973	-4.30052	0.232756	0.837046	2.39847e-08
chromosome	KZA74_09845	2,067,456..2,069,213	1758	<=	ATP-binding cassette domain-containing protein	ABC-2.A	ACX60_RS09580	NA	A1S_1671	KZA74_09845	588.869	-0.859293	-0.447988	-1.40203	0.241706	0.837046	1.98202e-05
chromosome	KZA74_18355	ND	ND	ND	rrf, 5S ribosomal RNA	rrf	NA	NA	A1S_r	KZA74_18355	69.5935	2.01845	0.875293	-6.88004	0.251281	0.837046	2.37e-07
chromosome	KZA74_05280	1,114,978..1,115,682	705	=>	acyl carrier protein	NA	ACX60_RS05255	ABUW_1099	A1S_3810	KZA74_05280	343.384	-0.771649	-0.552338	-0.0241865	0.25402	0.837046	0.943544
chromosome	KZA74_14530	3,041,474..3,041,548	75	=>	tRNA-Gln	trnQ	NA	NA	A1S_0830	KZA74_14530	136.255	1.01431	0.568234	0.837031	0.25402	0.837046	0.0376354
chromosome	KZA74_14230	2,981,950..2,983,017	1068	<=	KZA74_14230	NA	ACX60_RS13920	ABUW_3036	A1S_0892	KZA74_14230	1048.59	-0.824546	-0.762031	0.0169467	0.264823	0.837046	0.964492
chromosome	KZA74_17070	3,594,067..3,594,903	837	<=	general secretion pathway protein	gspC	ACX60_RS16740	ABUW_3607	A1S_0270	KZA74_17070	623.51	-0.73083	-0.302268	0.290851	0.278031	0.837046	0.342776
chromosome	KZA74_08635	ND	ND	<=	pcaD, 3-oxoadipate enol-lactonase	pcaD, catD	ACX60_RS08575	ABUW_1871	A1S_1850	KZA74_08635	470.332	-1.77303	-1.19859	-3.2154	0.280442	0.837046	4.53394e-06
chromosome	cobU	2,083,228..2,083,746	519	<=	cobU, bifunctional adenosylcobinamide kinase/adenosylcobinamide-phosphate guanylyltransferase	cobP, cobU	ACX60_RS09650	ABUW_2175	A1S_1659	KZA74_09915	176.196	-0.944554	-0.530066	-0.0981562	0.296183	0.837046	0.812831
chromosome	KZA74_07090	1,516,398..1,517,588	1191	=>	transcriptional regulator	NA	ACX60_RS07060	ABUW_1622	A1S_2101	KZA74_07090	585.608	-0.595214	-0.314589	-0.383522	0.308197	0.837046	0.123567
chromosome	KZA74_14745	3,084,239..3,086,272	2034	<=	KZA74_14745	NA	ACX60_RS14430	ABUW_3140	A1S_0786	KZA74_14745	2098.69	-1.05504	-0.587728	0.0527751	0.325865	0.837046	0.91627
chromosome	KZA74_07345	1,572,119..1,574,239	2121	=>	DNA polymerase III subunit gamma/tau	dnaX	ACX60_RS07310	ABUW_1680	A1S_2056	KZA74_07345	1486.23	-0.783467	-0.465867	0.691291	0.330118	0.837046	0.036727
chromosome	KZA74_08495	1,786,953..1,789,382	2430	=>	glucose/quinate/shikimate family membrane-bound PQQ-dependent dehydrogenase	quiA	ACX60_RS08435	ABUW_1843	A1S_1880	KZA74_08495	1325.26	-0.842315	-0.486885	-2.80449	0.345032	0.837046	2.31188e-16
chromosome	pyrH	1,682,149..1,682,877	729	=>	pyrH, UMP kinase	pyrH	ACX60_RS07925	ABUW_1736	A1S_1975	KZA74_07975	1067.4	-1.11918	-1.10002	0.824762	0.350692	0.837046	0.0883274
chromosome	KZA74_09660	ND	ND	ND	lpdA, dihydrolipoyl dehydrogenase	lpdA, DLD, lpd, pdhD	ACX60_RS09395	ABUW_2128	A1S_1702	KZA74_09660	1134.25	-1.46205	-1.18637	-4.00006	0.363035	0.837046	2.93546e-11
chromosome	KZA74_01430	300,486..300,561	76	<=	trnE	trnE	NA	NA	A1S_3188	KZA74_01430	94.6701	1.19755	0.571121	2.2563	0.364864	0.837046	2.80117e-06
chromosome	KZA74_13190	2,743,214..2,744,644	1431	=>	gamma-aminobutyraldehyde dehydrogenase	betB, gbsA	ACX60_RS12910	ABUW_2802	A1S_1089	KZA74_13190	1125.65	-1.49207	-0.894239	-3.0974	0.364864	0.837046	5.83555e-07
chromosome	KZA74_00370	79,099..80,211	1113	<=	oatA, acyltransferase	oatA	ACX60_RS00365	ABUW_0074	A1S_3410	KZA74_00370	341.981	0.811087	0.640956	0.340815	0.386004	0.837046	0.353917
chromosome	KZA74_09670	2,036,782..2,037,801	1020	<=	alpha-ketoacid dehydrogenase subunit beta	acoB	ACX60_RS09405	ABUW_2130	A1S_1700	KZA74_09670	1247.29	-1.89228	-1.39859	-4.70991	0.386004	0.837046	2.83375e-09
chromosome	mutS	2,551,172..2,553,817	2646	=>	mutS, DNA mismatch repair protein MutS	mutS	ACX60_RS11905	ABUW_2634	A1S_1251	KZA74_12195	1551.65	-0.579002	-0.314766	0.45647	0.386004	0.837046	0.0725916
chromosome	KZA74_06585	1,403,281..1,404,948	1668	=>	MCE family protein	pqiB	ACX60_RS06555	ABUW_1502	A1S_2204	KZA74_06585	945.679	-0.54102	-0.529915	-0.537251	0.397189	0.837046	0.0224741
chromosome	KZA74_15685	3,290,300..3,291,889	1590	<=	KZA74_15685	NA	ACX60_RS15360	NA	A1S_0551	KZA74_15685	803.944	-0.47822	-0.272925	-0.979379	0.415882	0.837046	1.01897e-06
chromosome	pstB	1,139,556..1,140,458	903	=>	pstB, phosphate ABC transporter ATP-binding proteinPstB	pstB	ACX60_RS05350	ABUW_1118	A1S_2445	KZA74_05375	969.864	-0.817949	-0.753391	1.86976	0.417851	0.837046	4.51e-08
chromosome	KZA74_06590	1,404,938..1,405,648	711	=>	PqiC family protein	pqiC, K09857	ACX60_RS06560	ABUW_1503	A1S_2203	KZA74_06590	329.44	-0.524577	-0.391294	-0.384644	0.425751	0.837046	0.0921187
chromosome	KZA74_11670	2,431,760..2,432,824	1065	<=	catalase family peroxidase	katA, CAT, catB, srpA	ACX60_RS11385	ABUW_2504	A1S_1351	KZA74_11670	476.801	-0.591581	-0.495148	-1.0835	0.428738	0.837046	1.63819e-05
chromosome	KZA74_09680	ND	ND	ND	lipA, lipoyl synthase	lipA	ACX60_RS09415	ABUW_2132	A1S_1698	KZA74_09680	267.31	-0.827078	-0.412794	-1.38537	0.43844	0.837046	0.000102264
chromosome	KZA74_12440	2,595,102..2,596,118	1017	=>	benC, Benzoate 1,2-dioxygenase electron transfercomponent	benC-xylZ	ACX60_RS12160	ABUW_2712	A1S_1213	KZA74_12440	717.531	-2.54861	-1.1199	-5.00159	0.43844	0.837046	6.42463e-06
chromosome	dnaQ	2,799,171..2,800,550	1380	=>	dnaQ, DNA polymerase III subunit epsilon	rnhA-dnaQ	ACX60_RS13105	ABUW_2841	A1S_1054	KZA74_13380	835.478	-0.609371	-0.309728	0.434833	0.43844	0.837046	0.115894
chromosome	cysN	2,854,558..2,856,171	1614	<=	cysN, sulfate adenylyltransferase subunit CysN	cysN	ACX60_RS13370	ABUW_2895	A1S_1001	KZA74_13660	2183.44	-1.10497	-0.917014	1.33409	0.43844	0.837046	0.00696889
chromosome	KZA74_14030	2,935,178..2,937,244	2067	<=	choline transporter	betT, betS	ACX60_RS13725	ABUW_2968	A1S_0930	KZA74_14030	1738.51	-0.577876	-0.613504	-0.361491	0.43844	0.837046	0.177752
pAB3	KZA74_19155	121,697..121,990	294	<=	KZA74_19155	NA	NA	NA	A1S_3550	KZA74_19155	73.2213	1.14139	0.813785	-0.440972	0.43844	0.837046	0.412665
chromosome	KZA74_10380	2,175,865..2,176,581	717	<=	KZA74_10380	NA	ACX60_RS10115	NA	A1S_3689	KZA74_10380	482.528	-1.13505	-0.504482	0.336342	0.455376	0.837046	0.541032
chromosome	KZA74_10605	2,209,281..2,210,168	888	<=	ParB/RepB/Spo0J family partition protein	parB, spo0J	ACX60_RS10335	ABUW_2262	A1S_1552	KZA74_10605	650.382	-0.612052	-0.491917	0.603453	0.456221	0.837046	0.0278961
chromosome	KZA74_00450	99,561..100,076	516	<=	pgpA, phosphatidylglycerophosphatase A	pgpA	ACX60_RS00450	ABUW_0091	A1S_3392	KZA74_00450	536.84	0.491612	0.371646	1.11967	0.463457	0.837046	1.02012e-07
chromosome	KZA74_17805	3,739,293..3,739,368	76	=>	tRNA-Gly	trnG	NA	NA	A1S_1234	KZA74_17805	117.3	0.900948	0.554378	-2.58286	0.463457	0.837046	4.41803e-10
pAB3	KZA74_18940	77,678..80,332	2655	=>	KZA74_18940	NA	NA	NA	NA	KZA74_18940	1684.94	1.85748	1.15584	4.03462	0.476969	0.837046	1.0297e-06
chromosome	KZA74_16125	3,391,495..3,391,854	360	=>	KZA74_16125	NA	ACX60_RS15800	ABUW_3418	A1S_0459	KZA74_16125	96.6159	1.10589	0.980877	1.33017	0.47756	0.837046	0.00731332
chromosome	KZA74_08540	1,796,657..1,797,355	699	=>	phosphoglycerate mutase family protein	NA	ACX60_RS08480	ABUW_1852	A1S_1871	KZA74_08540	271.368	-0.608377	-0.469998	-0.151603	0.480113	0.837046	0.605759
chromosome	KZA74_09655	2,033,019..2,033,804	786	<=	acetoin reductase	butA, budC	ACX60_RS09390	ABUW_2127	A1S_1704	KZA74_09655	443.907	-1.13944	-0.815967	-4.83476	0.489026	0.837046	3.70046e-21
pAB2	KZA74_19405	2314..2559	246	=>	type II toxin-antitoxin system RelB/DinJ family antitoxin	NA	NA	NA	NA	KZA74_19405	536.548	0.936172	0.54007	0.241036	0.531686	0.837046	0.617305
chromosome	KZA74_13200	2,745,503..2,746,222	720	=>	GntR family transcriptional regulator	NA	ACX60_RS12920	ABUW_2804	A1S_1087	KZA74_13200	303.774	-0.701332	-0.502885	-0.715122	0.544285	0.837046	0.029346
chromosome	KZA74_07795	1,646,597..1,646,715	119	=>	nitrate transporter	nasF	NA	NA	NA	KZA74_07795	29.9473	1.57159	0.762269	-2.86146	0.549127	0.837046	0.000462448
chromosome	cysE	2,310,677..2,311,492	816	=>	cysE, serine O-acetyltransferase	cysE	ACX60_RS10825	ABUW_2362	A1S_1463	KZA74_11095	501.572	-0.5265	-0.359387	0.412138	0.549127	0.837046	0.0972774
chromosome	ribD	3,640,134..3,641,219	1086	<=	ribD, bifunctionaldiaminohydroxyphosphoribosylaminopyrimidine deaminase/5-amino-6-(5-phosphoribosylamino)uracil reductase RibD	ribD	ACX60_RS16965	ABUW_3652	A1S_0221	KZA74_17295	923.843	-0.544908	-0.367457	0.736909	0.549127	0.837046	0.00359391
chromosome	KZA74_09125	1,920,349..1,921,164	816	<=	PAAR domain-containing protein	NA	ACX60_RS09070	NA	A1S_1760	KZA74_09125	339.326	-0.543277	-0.525537	0.104658	0.550763	0.837046	0.701864
chromosome	KZA74_03510	720,542..720,617	76	=>	tRNA-Val	NA	NA	NA	A1S_2800	KZA74_03510	115.627	0.78948	0.477988	-0.18419	0.556513	0.837046	0.65259
chromosome	KZA74_14855	3,107,476..3,107,823	348	<=	excalibur calcium-binding domain-containingprotein	NA	ACX60_RS14540	ABUW_3162	A1S_0767	KZA74_14855	212.343	-0.592673	-0.324896	-0.316318	0.568275	0.837046	0.266085
chromosome	pcaG	1,782,495..1,783,124	630	=>	pcaG, protocatechuate 3,4-dioxygenase subunit alpha	pcaG	ACX60_RS08415	ABUW_1839	A1S_1884	KZA74_08475	368.19	-1.06621	-0.620922	-2.80427	0.56883	0.837046	1.322e-08
chromosome	nadB	1,042,788..1,044,431	1644	<=	nadB, L-aspartate oxidase	nadB	ACX60_RS04930	ABUW_1026	A1S_2526	KZA74_04945	895.744	-0.532984	-0.341444	0.0950091	0.579394	0.837046	0.737818
chromosome	KZA74_16910	3,561,564..3,562,208	645	<=	alpha/beta hydrolase	K07002	ACX60_RS16580	ABUW_3575	A1S_0301	KZA74_16910	181.34	0.794245	0.809251	0.732796	0.579394	0.837046	0.0571337
pAB3	KZA74_18770	39,826..39,828	3	<=	KZA74_18770	NA	NA	NA	NA	KZA74_18770	58.3423	1.24274	0.713371	0.750219	0.579394	0.837046	0.227999
pAB3	KZA74_19195	126,682..127,107	426	<=	KZA74_19195	NA	NA	NA	A1S_3552	KZA74_19195	114.598	0.668825	0.349463	0.957201	0.579394	0.837046	0.00184449
pAB3	KZA74_19190	124,711..126,561	1851	<=	KZA74_19190	NA	NA	NA	NA	KZA74_19190	80.5926	0.991723	0.750262	0.986964	0.600399	0.837046	0.0400887
chromosome	pcaH	1,781,755..1,782,480	726	=>	pcaH, protocatechuate 3,4-dioxygenase subunit beta	pcaH	ACX60_RS08410	ABUW_1838	A1S_1885	KZA74_08470	362.377	-1.08606	-0.576485	-2.69753	0.608193	0.837046	1.87566e-07
chromosome	KZA74_08325	1,751,822..1,752,502	681	=>	M48 family metallopeptidase	K07043	ACX60_RS08265	ABUW_1808	A1S_1914	KZA74_08325	380.33	-0.64224	-0.620369	0.529114	0.614206	0.837046	0.0950986
chromosome	KZA74_14735	3,081,054..3,083,465	2412	<=	heme utilization protein	NA	ACX60_RS14420	ABUW_3138	A1S_0788	KZA74_14735	1389.33	-0.608927	-0.322	-0.387037	0.615939	0.837046	0.217383
chromosome	KZA74_07860	1,662,042..1,663,277	1236	=>	molybdopterin molybdotransferase MoeA	moeA	ACX60_RS07810	ABUW_1713	A1S_1995	KZA74_07860	672.242	-0.449933	-0.266348	0.122472	0.63383	0.837046	0.608806
chromosome	cydX	1,735,226..1,735,327	102	<=	cydX, cytochrome bd-I oxidase subunit CydX	cydX	ACX60_RS08195	ABUW_1793	NA	KZA74_08255	254.045	-1.4635	-1.57188	-2.33856	0.654835	0.837046	0.00131776
chromosome	rrf	23,433..23,547	115	=>	rrf 5S ribosomal	rrf	NA	NA	A1S_r	KZA74_00095	14.7069	2.34357	1.54696	-6.05095	0.670159	0.837046	0.000446596
chromosome	KZA74_05450	1,154,506..1,157,124	2619	<=	AAA family ATPase	NA	ACX60_RS05425	ABUW_1133	A1S_2428	KZA74_05450	2570.59	-0.512223	-0.277974	0.944918	0.670159	0.837046	0.000195151
chromosome	tauD	2,328,335..2,329,216	882	<=	tauD, taurine dioxygenase	tauD	ACX60_RS10910	ABUW_2379	A1S_1445	KZA74_11180	460.909	-0.736541	-0.615694	0.759217	0.682974	0.837046	0.0421735
chromosome	KZA74_10520	ND	ND	ND	tadA, tRNA adenosine(34) deaminase TadA	NA	ACX60_RS10250	ABUW_2245	A1S_1569	KZA74_10520	355.147	-0.666036	-0.418004	-0.27364	0.683718	0.837046	0.439404
chromosome	thiM	1,522,389..1,523,216	828	<=	thiM, hydroxyethylthiazole kinase	thiM	ACX60_RS07085	ABUW_1627	A1S_2095	KZA74_07115	398.288	-0.516816	-0.441723	-0.736714	0.696595	0.837046	0.00439112
pAB3	KZA74_18810	45,106..45,213	108	<=	KZA74_18810	NA	NA	NA	A1S_3511	KZA74_18810	151.427	1.01864	0.604082	1.61037	0.69945	0.837046	0.00169421
chromosome	KZA74_18505	3,895,208..3,895,906	699	<=	DsbC family protein	dsbC	ACX60_RS18155	ABUW_3899	A1S_2976	KZA74_18505	224.571	0.643315	0.440132	0.780753	0.713647	0.837046	0.0170805
chromosome	murF	311,640..313,040	1401	=>	murF, UDP-N-acetylmuramoyl-tripeptide--D-alanyl-D-alanine ligase	murF	ACX60_RS01500	ABUW_0285	A1S_3202	KZA74_01490	1179.13	-0.608261	-0.388503	0.2916	0.717157	0.837046	0.378064
chromosome	KZA74_10145	2,132,573..2,134,303	1731	<=	ABC transporter ATP-binding protein	gsiA, ABC.PE.A1	ACX60_RS09880	ABUW_2221	A1S_1613	KZA74_10145	966.563	-0.604042	-0.485734	-0.033419	0.732483	0.837046	0.926101
chromosome	pcaC	1,781,331..1,781,744	414	=>	pcaC, 4-carboxymuconolactone decarboxylase	pcaC	ACX60_RS08405	ABUW_1837	A1S_1886	KZA74_08465	205.613	-0.966016	-0.516753	-3.01114	0.734505	0.837046	6.16234e-10
chromosome	pqqB	1,968,771..1,969,682	912	<=	pqqB, pyrroloquinoline quinone biosynthesis proteinPqqB	pqqB	NA	NA	NA	KZA74_09350	511.655	-0.544526	-0.310772	0.479292	0.752285	0.837046	0.095216
chromosome	KZA74_03020	616,440..617,333	894	<=	KZA74_03020	ghy	ACX60_RS03015	ABUW_0593	A1S_2898	KZA74_03020	405.418	0.734731	0.504773	0.171153	0.7601	0.837046	0.688558
chromosome	KZA74_10165	2,138,451..2,140,274	1824	<=	ABC transporter substrate-binding protein	oppA	ACX60_RS09900	ABUW_2225	A1S_1609	KZA74_10165	613.906	-0.611	-0.380918	0.0964448	0.7601	0.837046	0.784622
chromosome	KZA74_07460	1,596,056..1,596,922	867	<=	KZA74_07460	NA	ACX60_RS07425	NA	A1S_3775	KZA74_07460	523.415	-0.747165	-0.401755	0.173488	0.765098	0.837046	0.688334
chromosome	KZA74_01175	253,481..253,939	459	=>	KZA74_01175	NA	ACX60_RS01190	NA	NA	KZA74_01175	116.948	0.827447	0.640609	-2.98008	0.768379	0.837046	2.93489e-11
chromosome	KZA74_05785	1,240,927..1,243,698	2772	=>	M1 family metallopeptidase	E3.4.11.14	ACX60_RS05755	ABUW_1203	A1S_2356	KZA74_05785	1098.99	-0.493122	-0.328371	-0.423062	0.769546	0.837046	0.115415
chromosome	KZA74_09560	2,013,309..2,014,307	999	<=	HEAT repeat domain-containing protein	NA	ACX60_RS09295	ABUW_2108	A1S_1723	KZA74_09560	171.473	-0.855459	-0.479736	-1.39518	0.780037	0.837046	0.00181898
chromosome	KZA74_05295	1,119,491..1,120,507	1017	<=	AI-2E family transporter	NA	ACX60_RS05270	ABUW_1102	A1S_2461	KZA74_05295	262.531	0.668251	0.769058	0.569772	0.796039	0.837046	0.119098
chromosome	KZA74_18025	3,792,596..3,792,730	135	<=	zinc ribbon-containing protein	zinc ribbon	ACX60_RS17680	NA	A1S_0078	KZA74_18025	64.1654	0.921639	0.915238	0.938129	0.807201	0.837046	0.0558248
chromosome	putA	2,234,493..2,238,245	3753	=>	putA, trifunctional transcriptional regulator/proline dehydrogenase/L-glutamate gamma-semialdehyde dehydrogenase	putA	ACX60_RS10460	ABUW_2287	A1S_1528	KZA74_10730	6726.69	2.21373	1.56212	1.84944	0.807483	0.837046	0.138295
chromosome	KZA74_14575	3,048,357..3,049,124	768	=>	hydroxymethylpyrimidine/phosphomethylpyrimidinekinase	thiD	ACX60_RS14260	ABUW_3105	A1S_0821	KZA74_14575	326.424	-0.549943	-0.36529	-0.248843	0.807899	0.837046	0.419519
chromosome	KZA74_18465	3,887,657..3,888,253	597	=>	undecaprenyl-diphosphatase	bcrC	ACX60_RS18110	ABUW_3890	A1S_2968	KZA74_18465	177.3	0.712986	0.521522	-0.440982	0.807899	0.837046	0.274152
chromosome	KZA74_15340	3,217,719..3,218,096	378	=>	DUF4951 domain-containing protein	NA	ACX60_RS15025	ABUW_3263	A1S_3507	KZA74_15340	227.942	0.50912	0.383938	0.685083	0.82579	0.837046	0.0114953
pAB3	KZA74_18780	40,854..41,426	573	=>	KZA74_18780	NA	NA	NA	NA	KZA74_18780	46.0665	0.952048	0.557596	-0.14824	0.82579	0.837046	0.794799
chromosome	KZA74_17270	3,636,651..3,637,058	408	=>	DNA polymerase III subunit chi	holC	ACX60_RS16940	ABUW_3647	A1S_0226	KZA74_17270	311.066	-0.668859	-0.621499	0.175319	0.829543	0.837046	0.657981
chromosome	KZA74_15045	3,156,494..3,157,861	1368	<=	amidohydrolase	NA	ACX60_RS14730	ABUW_3204	A1S_0731	KZA74_15045	868.687	-0.548598	-0.443375	-0.70193	0.834709	0.837046	0.02066
chromosome	KZA74_13800	2,884,657..2,886,204	1548	=>	KZA74_13800	NA	ACX60_RS13500	ABUW_2923	A1S_0974	KZA74_13800	1385.04	-0.814007	-0.512959	0.559071	0.839599	0.837046	0.234841
chromosome	KZA74_02725	551,930..552,259	330	=>	KZA74_02725	NA	ACX60_RS02725	NA	A1S_3852	KZA74_02725	95.465	0.596832	0.65515	0.157066	0.854335	0.837046	0.654509
chromosome	KZA74_06820	1,454,254..1,454,676	423	<=	KZA74_06820	NA	ACX60_RS06790	ABUW_1564	A1S_2157	KZA74_06820	536.724	-0.605841	0.409151	0.0352157	0.860509	0.837046	0.926208
chromosome	KZA74_08545	1,797,371..1,798,114	744	=>	SDR family oxidoreductase	NA	ACX60_RS08485	ABUW_1853	A1S_1870	KZA74_08545	393.022	-0.432195	-0.357453	-0.449514	0.860509	0.837046	0.0598207
chromosome	KZA74_15115	3,174,845..3,174,921	77	<=	tRNA-Pro	trnP	NA	NA	A1S_0717	KZA74_15115	83.7518	0.86371	0.480912	-0.742305	0.860509	0.837046	0.136536
chromosome	KZA74_09675	2,037,815..2,038,777	963	<=	thiamine pyrophosphate-dependent dehydrogenaseE1 component subunit alpha	acoA	ACX60_RS09410	ABUW_2131	A1S_1699	KZA74_09675	1579.06	-1.58085	-1.19239	-4.73963	0.870139	0.837046	4.1063e-08
chromosome	KZA74_10115	2,128,224..2,128,889	666	<=	nucleoside-diphosphate sugar epimerase	NA	ACX60_RS09850	ABUW_2215	A1S_1618	KZA74_10115	186.373	-0.674848	-0.376778	-0.476934	0.870139	0.837046	0.217051
chromosome	KZA74_16945	3,568,936..3,569,289	354	<=	DUF1311 domain-containing protein	NA	ACX60_RS16615	ABUW_3582	A1S_0293	KZA74_16945	432.497	-1.04446	-0.805615	0.293351	0.870139	0.837046	0.650933
chromosome	KZA74_17565	3,697,656..3,697,862	207	<=	KZA74_17565	NA	ACX60_RS17230	ABUW_3718	A1S_0171	KZA74_17565	118.68	0.625271	0.512383	-0.802001	0.870139	0.837046	0.0234796
chromosome	KZA74_00780	169,209..169,649	441	<=	KZA74_00780	NA	ACX60_RS00800	ABUW_0153	NA	KZA74_00780	636.806	-0.934245	-0.701731	-3.01468	0.876491	0.837046	4.97124e-09
chromosome	KZA74_06945	1,487,628..1,487,990	363	=>	KZA74_06945	NA	ACX60_RS06915	ABUW_1592	A1S_2129	KZA74_06945	170.32	0.46779	0.323336	0.603159	0.876491	0.837046	0.0185332
chromosome	pqqD	1,967,723..1,968,007	285	<=	pqqD, pyrroloquinoline quinone biosynthesis peptidechaperone PqqD	pqqD	NA	NA	NA	KZA74_09340	92.5988	-0.681509	-0.532016	1.05081	0.876491	0.837046	0.00268745
chromosome	KZA74_09850	2,069,206..2,070,228	1023	<=	HlyD family efflux transporter periplasmicadaptor subunit	ABC-2.TX	ACX60_RS09585	NA	A1S_1670	KZA74_09850	284.523	-0.725203	-0.428556	-2.28971	0.884719	0.837046	1.15817e-08
chromosome	KZA74_15185	3,185,202..3,185,474	273	=>	DUF2218 domain-containing protein	K09956	ACX60_RS14870	ABUW_3232	A1S_0704	KZA74_15185	207.686	0.632011	0.750773	3.13227	0.884719	0.837046	6.57479e-22
chromosome	KZA74_16315	3,427,876..3,428,886	1011	<=	AraC family transcriptional regulator	NA	ACX60_RS15990	ABUW_3456	A1S_0422	KZA74_16315	1097.3	-0.743383	-0.839903	-0.137581	0.884719	0.837046	0.769518
chromosome	hcaR	3,444,020..3,444,919	900	=>	hcaR, DNA-binding transcriptional regulator HcaR	hcaR	ACX60_RS16065	ABUW_3471	A1S_0410	KZA74_16390	458.274	0.647414	0.695151	1.61651	0.884719	0.837046	6.61068e-06
chromosome	pgi	3,811,418..3,813,088	1671	<=	galE, UDP-glucose 4-epimerase GalE	gne1	ACX60_RS17740	ABUW_3816	A1S_0065	KZA74_18090	1806.58	-1.11206	-0.972233	0.793793	0.884719	0.837046	0.236764
chromosome	KZA74_03950	814,828..815,352	525	=>	YecA family protein	K07039	ACX60_RS03940	ABUW_0864	A1S_2707	KZA74_03950	1146.09	-0.96059	-0.76246	0.847403	0.900578	0.837046	0.141935
chromosome	KZA74_09610	2,023,026..2,023,880	855	<=	AraC family transcriptional regulator	K07506	ACX60_RS09345	ABUW_2118	A1S_1713	KZA74_09610	515.828	-0.366084	-0.211544	-0.0135364	0.900578	0.837046	0.95365
chromosome	KZA74_03150	645,569..646,564	996	=>	DUF2804 domain-containing protein	NA	ACX60_RS03145	ABUW_0619	A1S_2873	KZA74_03150	492.555	0.508964	0.289713	-0.253118	0.904452	0.837046	0.415769
chromosome	dapE	716,216..717,352	1137	<=	dapE, succinyl-diaminopimelate desuccinylase	dapE	ACX60_RS03455	ABUW_0686	A1S_2810	KZA74_03460	818.733	-0.517286	-0.363737	1.50636	0.928724	0.837046	1.86903e-07
chromosome	KZA74_05795	1,244,675..1,246,477	1803	<=	aminopeptidase P family protein	pepP	ACX60_RS05765	ABUW_1205	A1S_2354	KZA74_05795	1466.49	-0.794776	-0.599334	-0.358592	0.928724	0.837046	0.471389
chromosome	KZA74_07695	1,625,354..1,625,743	390	=>	KZA74_07695	NA	ACX60_RS07655	NA	A1S_3759	KZA74_07695	330.078	-0.902324	-0.575208	-0.517108	0.928724	0.837046	0.349871
chromosome	KZA74_09685	2,040,286..2,041,425	1140	=>	transcriptional regulator	NA	ACX60_RS09420	ABUW_2133	A1S_1697	KZA74_09685	473.323	-0.515521	-0.331552	-0.522086	0.928724	0.837046	0.0891515
chromosome	KZA74_11980	2,501,564..2,504,347	2784	<=	vgrG, type VI secretion system tip protein VgrG	vgrG	ACX60_RS11695	NA	A1S_1288	KZA74_11980	2188.94	-0.540927	-0.389286	0.320129	0.928724	0.837046	0.340487
chromosome	hrpA	2,602,612..2,606,469	3858	<=	hrpA, ATP-dependent RNA helicase HrpA	hrpA	ACX60_RS12190	ABUW_2718	A1S_1206	KZA74_12470	3637.57	-0.660164	-0.595885	0.919239	0.95741	0.837046	0.0208728
chromosome	KZA74_04150	865,993..866,078	86	<=	tRNA-Leu	trnL	NA	NA	A1S_2676	KZA74_04150	38.0968	1.02004	0.603353	-1.223	0.966359	0.837046	0.0515155
chromosome	rimO	1,680,754..1,682,097	1344	=>	rimO, 30S ribosomal protein S12 methylthiotransferaseRimO	rimO	ACX60_RS07920	ABUW_1735	A1S_1976	KZA74_07970	1376.14	-0.733095	-0.854899	1.44477	0.96971	0.837046	0.000926731
chromosome	KZA74_15495	3,250,567..3,251,103	537	<=	ribosome-associated protein	yjgA	ACX60_RS15175	ABUW_3292	A1S_0590	KZA74_15495	630.731	-0.72531	-0.669569	0.498744	0.96971	0.837046	0.274309
chromosome	recF	2659..3741	1083	=>	recF, DNA replication/repair protein RecF	recF	ACX60_RS00015	ABUW_0003	A1S_0003	KZA74_00015	952.769	-0.361355	-0.31435	0.464158	0.973209	0.837046	0.126942
chromosome	KZA74_00030	6778..7335	558	<=	dedA, VTT domain-containing protein	dedA	ACX60_RS00030	ABUW_0006	A1S_0006	KZA74_00030	237.679	0.406415	0.441832	0.563785	0.973209	0.837046	0.160446
chromosome	erpA	13,513..13,848	336	=>	erpA, iron-sulfur cluster insertion protein ErpA	erpA	ACX60_RS00055	ABUW_0011	A1S_0011	KZA74_00055	1718.66	0.537933	-0.683679	1.09981	0.973209	0.837046	0.112716
chromosome	KZA74_00065	14,877..16,004	1128	<=	anmK, anhydro-N-acetylmuramic acid kinase	anmK	ACX60_RS00065	ABUW_0013	A1S_0013	KZA74_00065	1212.47	-0.259125	-0.5407	0.359215	0.973209	0.837046	0.241945
chromosome	tyrS	16,066..17,298	1233	=>	tyrS, tyrosine--tRNA ligase	YARS, tyrS	ACX60_RS00070	ABUW_0014	A1S_0014	KZA74_00070	952.371	0.246168	-0.259723	1.18282	0.973209	0.837046	1.764e-06
chromosome	KZA74_00110	25,664..27,142	1479	=>	sodium-dependent transporter	TC.NSS	ACX60_RS00110	ABUW_0022	A1S_3458	KZA74_00110	2460.23	-0.481127	-0.646554	-1.35821	0.973209	0.837046	0.0329798
chromosome	rsmB	27,342..28,646	1305	<=	rsmB, 16S rRNA (cytosine(967)-C(5))-methyltransferaseRsmB	rsmB, sun	ACX60_RS00120	ABUW_0024	A1S_3457	KZA74_00120	846.747	-0.377198	-0.381321	-0.161031	0.973209	0.837046	0.699921
chromosome	KZA74_00215	51,580..51,954	375	<=	KZA74_00215	NA	ACX60_RS00215	ABUW_0044	A1S_3912	KZA74_00215	54.6706	0.272189	0.671176	-2.50117	0.973209	0.837046	1.12637e-06
chromosome	KZA74_00320	68,015..69,358	1344	=>	norM, MATE family efflux transporter	dinF, norM	ACX60_RS00315	ABUW_0064	A1S_3420	KZA74_00320	609.056	0.408576	0.642206	-4.05018	0.973209	0.837046	6.96344e-12
chromosome	hutU	82,140..83,816	1677	=>	hutU, urocanate hydratase	hutU, UROC1	ACX60_RS00380	ABUW_0077	A1S_3406	KZA74_00385	19671.8	-1.01441	-0.919107	0.435961	0.973209	0.837046	0.654509
chromosome	KZA74_00395	85,507..86,919	1413	=>	proY, amino acid permease	hutT	ACX60_RS00390	ABUW_0079	A1S_3404	KZA74_00395	4813	-0.85397	-0.718558	0.94672	0.973209	0.837046	0.216238
chromosome	KZA74_00415	91,286..91,924	639	=>	HAD hydrolase	gph	ACX60_RS00410	ABUW_0083	A1S_3399	KZA74_00415	210.769	0.330763	0.432227	-0.939373	0.973209	0.837046	0.00452933
chromosome	KZA74_00425	92,735..93,358	624	<=	leuE, LysE family translocator	leuE	ACX60_RS00420	NA	A1S_3397	KZA74_00425	136.616	0.287596	0.490469	-1.2406	0.973209	0.837046	0.00159114
chromosome	nusB	100,987..101,436	450	<=	nusB, transcription antitermination factor NusB	nusB	ACX60_RS00460	ABUW_0093	A1S_3390	KZA74_00460	888.649	-0.414661	-0.851931	0.872755	0.973209	0.837046	0.177201
chromosome	ribE	101,440..101,910	471	<=	ribE, 6,7-dimethyl-8-ribityllumazine synthase	ribH, RIB4, ribE	ACX60_RS00465	ABUW_0094	A1S_3389	KZA74_00465	1089.73	-0.685455	-1.19617	0.945007	0.973209	0.837046	0.15761
chromosome	KZA74_00470	101,922..103,043	1122	<=	ribBA, bifunctional3,4-dihydroxy-2-butanone-4-phosphate synthase/GTP cyclohydrolase II	ribBA	ACX60_RS00470	ABUW_0095	A1S_3388	KZA74_00470	2071.64	-0.760176	-0.862486	1.34116	0.973209	0.837046	0.00951324
chromosome	KZA74_00515	111,680..112,528	849	=>	rhdA, sulfurtransferase	rhdA, TST, MPST, sseA	ACX60_RS00515	ABUW_0102	A1S_3379	KZA74_00515	756.093	-0.367345	-0.306721	0.774455	0.973209	0.837046	0.00954215
chromosome	KZA74_00525	113,597..114,793	1197	=>	lysophospholipase	lpl	ACX60_RS00525	ABUW_0104	A1S_3377	KZA74_00525	1142.71	-0.43373	-0.362645	-0.361113	0.973209	0.837046	0.317735
chromosome	KZA74_00570	123,558..124,097	540	<=	DUF924 domain-containing protein	NA	ACX60_RS00570	ABUW_0113	A1S_3367	KZA74_00570	320.308	-0.342723	-0.283641	0.881423	0.973209	0.837046	0.000165873
chromosome	gshA	124,266..125,843	1578	=>	gshA, glutamate--cysteine ligase	gshA	ACX60_RS00575	ABUW_0114	A1S_3904	KZA74_00575	1179.94	-0.242668	-0.329685	0.769768	0.973209	0.837046	0.00186961
chromosome	KZA74_00600	133,234..133,959	726	=>	SH3 domain-containing protein	SH3	ACX60_RS00615	ABUW_0121	A1S_3900	KZA74_00600	82.5911	0.456066	0.716213	-0.0843466	0.973209	0.837046	0.903353
chromosome	KZA74_00610	134,835..135,491	657	<=	haloacid dehalogenase	pgpC	ACX60_RS00630	NA	A1S_3362	KZA74_00610	120.904	0.426248	0.719708	-1.68848	0.973209	0.837046	0.00248801
chromosome	uraH	145,370..145,693	324	<=	uraH, hydroxyisourate hydrolase	uraH, pucM, hiuH	ACX60_RS00680	ABUW_0130	A1S_3353	KZA74_00660	114.94	0.84951	0.7232	-1.93835	0.973209	0.837046	0.000658948
chromosome	dsbD	149,374..151,188	1815	=>	dsbD, protein-disulfide reductase DsbD	dsbD	ACX60_RS00710	ABUW_0136	A1S_3346	KZA74_00690	1659.61	-0.168501	-0.323521	0.858796	0.973209	0.837046	0.00332679
chromosome	KZA74_00695	151,180..152,373	1194	<=	diguanylate cyclase	dgnC	ACX60_RS00715	ABUW_0137	A1S_3345	KZA74_00695	324.408	0.382983	0.484421	-0.544557	0.973209	0.837046	0.157697
chromosome	xth	154,891..155,715	825	<=	xth, exoA, exodeoxyribonuclease III	exoA, E3.1.11.2, xthA	ACX60_RS00735	ABUW_0141	A1S_3341	KZA74_00715	535.597	-0.240274	-0.284133	-0.0133119	0.973209	0.837046	0.964463
chromosome	KZA74_00725	156,645..156,839	195	=>	KZA74_00725	NA	ACX60_RS00745	NA	NA	KZA74_00725	41.2688	0.713226	0.98169	0.953539	0.973209	0.837046	0.0248918
chromosome	murG	161,057..162,154	1098	=>	murG, undecaprenyldiphospho-muramoylpentapeptide beta-N-acetylglucosaminyltransferase	murG	ACX60_RS00765	ABUW_0146	A1S_3336	KZA74_00745	1266.69	-0.38876	-0.420505	0.603509	0.973209	0.837046	0.0972845
chromosome	murC	162,166..163,614	1449	=>	murC, UDP-N-acetylmuramate--L-alanine ligase	murC	ACX60_RS00770	ABUW_0147	A1S_3335	KZA74_00750	1963.79	-0.615886	-0.707788	0.571349	0.973209	0.837046	0.193948
chromosome	KZA74_00755	163,652..164,578	927	=>	ddl, D-alanine--D-alanine ligase	ddl	ACX60_RS00775	ABUW_0148	A1S_3334	KZA74_00755	1448.63	-0.444008	-0.585143	0.0161192	0.973209	0.837046	0.974963
chromosome	ftsA	165,496..166,758	1263	=>	ftsA, cell division protein FtsA	ftsA	ACX60_RS00785	ABUW_0150	A1S_3332	KZA74_00765	3503.29	-0.301187	-0.695941	0.690596	0.973209	0.837046	0.257839
chromosome	KZA74_00785	169,757..170,449	693	=>	peptidase M23	M23	ACX60_RS00805	ABUW_0154	A1S_3329	KZA74_00785	1981.32	-0.528397	-0.57752	1.0849	0.973209	0.837046	0.0507377
chromosome	aceE	170,700..173,417	2718	=>	aceE, pyruvate dehydrogenase (acetyl-transferring),homodimeric type	aceE	ACX60_RS00810	ABUW_0155	A1S_3328	KZA74_00790	10335.2	-0.822947	-1.35197	0.484798	0.973209	0.837046	0.597236
chromosome	prfB	187,013..188,108	1096	=>	prfB, peptide chain release factor 2	prfB	ACX60_RS00870	ABUW_0167	A1S_3316	KZA74_00850	2168.99	-0.270497	-0.53834	1.33876	0.973209	0.837046	0.00231607
chromosome	KZA74_00880	192,935..193,510	576	<=	DUF805 domain-containing protein	NA	ACX60_RS00900	ABUW_0174	A1S_3310	KZA74_00880	282.781	0.560132	0.594227	-0.241574	0.973209	0.837046	0.529278
chromosome	acs	193,805..195,754	1950	=>	acs, acsA, acetate--CoA ligase	ACSS, acs	ACX60_RS00905	ABUW_0175	A1S_3309	KZA74_00885	6659.31	-0.521857	-1.1868	-2.76135	0.973209	0.837046	0.00403683
chromosome	betT	207,837..209,804	1968	=>	betT	betT, betS	ACX60_RS00960	ABUW_0186	A1S_3298	KZA74_00940	3147.55	-0.685408	-1.02049	0.134741	0.973209	0.837046	0.850786
chromosome	omp33-36	209,871..210,770	900	<=	omp33-36	omp33-36	ACX60_RS00965	ABUW_0187	A1S_3297	KZA74_00945	9452.95	-1.0276	-1.34065	2.19046	0.973209	0.837046	0.0329922
chromosome	KZA74_00950	211,763..213,469	1707	=>	diguanylate cyclase	dgc	ACX60_RS00970	ABUW_0188	A1S_3296	KZA74_00950	444.187	0.263177	0.468417	-0.344331	0.973209	0.837046	0.17663
chromosome	KZA74_00970	218,282..218,635	354	=>	KZA74_00970	K08987	ACX60_RS00990	ABUW_0192	A1S_3292	KZA74_00970	89.3097	0.209304	0.384037	-0.54028	0.973209	0.837046	0.143161
chromosome	KZA74_00975	218,688..219,029	342	=>	ydgC, inner membrane protein	glpM, ydgC	ACX60_RS00995	ABUW_0193	A1S_3291	KZA74_00975	187.578	0.495643	0.472813	-1.36461	0.973209	0.837046	0.000392618
chromosome	KZA74_01015	225,221..226,663	1443	=>	gabP, amino acid permease	gabP	ACX60_RS01035	ABUW_0201	A1S_3283	KZA74_01015	1007.24	-0.596613	-0.639352	-2.52534	0.973209	0.837046	1.26599e-06
chromosome	gabT	228,384..229,676	1293	=>	gabT, puuE, 4-aminobutyrate--2-oxoglutarate transaminase	puuE	ACX60_RS01045	ABUW_0203	A1S_3281	KZA74_01025	1259.15	-0.794777	-0.933109	-3.8126	0.973209	0.837046	5.74611e-07
chromosome	KZA74_01040	232,221..232,847	627	<=	ycaC, hydrolase	ycaC	ACX60_RS01060	ABUW_0206	A1S_3278	KZA74_01040	1193.94	-0.809161	-0.595172	0.125215	0.973209	0.837046	0.843945
chromosome	KZA74_01070	237,822..237,920	99	=>	KZA74_01070	NA	NA	NA	NA	KZA74_01070	31.0973	0.766034	1.2958	-0.870375	0.973209	0.837046	0.350852
chromosome	KZA74_01090	240,424..241,311	888	<=	DMT family transporter	DMT	ACX60_RS01105	ABUW_0215	A1S_3270	KZA74_01090	278.889	0.306911	0.48164	-1.6553	0.973209	0.837046	0.000470303
chromosome	KZA74_01095	241,540..242,283	744	=>	KZA74_01095	NA	ACX60_RS01110	ABUW_0216	A1S_3269	KZA74_01095	333.492	-0.422802	-0.439907	-0.30695	0.973209	0.837046	0.40838
chromosome	KZA74_01170	252,531..253,487	957	=>	restriction endonuclease PvuRts1I	pvuRts1I	ACX60_RS01185	NA	A1S_3257	KZA74_01170	111.514	0.607676	0.58196	-1.76396	0.973209	0.837046	3.09746e-05
chromosome	KZA74_01190	255,173..255,985	813	<=	araC family transcriptional regulator	araC	ACX60_RS01205	NA	A1S_3255	KZA74_01190	183.34	0.614712	1.05215	-2.12076	0.973209	0.837046	0.00245867
chromosome	KZA74_01200	256,330..258,207	1878	=>	kup, pottassium transporter	kup	ACX60_RS01215	ABUW_0232	A1S_3254	KZA74_01200	1899.55	-0.355184	-0.483219	0.397161	0.973209	0.837046	0.271792
chromosome	KZA74_01215	260,138..260,737	600	=>	lysE transporter	lysE	ACX60_RS01230	ABUW_0235	A1S_3251	KZA74_01215	125.608	0.410622	0.560391	-2.55412	0.973209	0.837046	6.3914e-06
chromosome	aqpZ	261,204..261,893	690	<=	aqpZ, aquaporin Z	aqpZ	ACX60_RS01240	ABUW_0237	A1S_3248	KZA74_01225	1465.88	-0.834598	-1.12974	-1.15317	0.973209	0.837046	0.0677681
chromosome	hisA	268,673..269,404	732	<=	hisA, 1-(5-phosphoribosyl)-5-[(5- phosphoribosylamino)methylideneamino]imidazole-4- carboxamide isomerase	hisA	ACX60_RS01290	ABUW_0246	A1S_3238	KZA74_01275	846.394	-0.333925	-0.659568	-0.0806814	0.973209	0.837046	0.860251
chromosome	KZA74_01280	269,499..270,140	642	<=	rnd, exonuclease	rnd	ACX60_RS01295	ABUW_0247	A1S_3237	KZA74_01280	173.198	0.355958	0.459439	0.136365	0.973209	0.837046	0.769518
chromosome	KZA74_01300	272,242..272,625	384	=>	panM, PanD maturation, GNAT family N-acetyltransferase	panM	ACX60_RS01315	ABUW_0251	A1S_3233	KZA74_01300	558.105	-0.286412	-0.510194	-0.0732319	0.973209	0.837046	0.880952
chromosome	KZA74_01310	272,933..273,008	76	=>	trnF, tRNA-Phe	NA	NA	NA	A1S_3215	KZA74_01310	93.6003	0.676952	0.647214	-1.55484	0.973209	0.837046	0.00132588
chromosome	KZA74_01330	275,448..276,905	1458	<=	envZ, Osmolarity sensor protein EnvZ	envZ	ACX60_RS01340	ABUW_0256	A1S_3230	KZA74_01330	2049.89	-0.552421	-0.563854	0.333257	0.973209	0.837046	0.569808
chromosome	ompR	276,923..277,687	765	<=	ompR, two-component system response regulator OmpR	ompR	ACX60_RS01345	ABUW_0257	A1S_3229	KZA74_01335	3478.65	-0.53885	-0.893556	0.403037	0.973209	0.837046	0.617426
chromosome	KZA74_01340	278,343..280,691	2349	=>	yhgF, RNA-binding transcriptional accessory protein	tex, yhgF	ACX60_RS01350	ABUW_0258	A1S_3227	KZA74_01340	2802.25	-0.69394	-0.772853	0.391429	0.973209	0.837046	0.461875
chromosome	KZA74_01350	283,251..284,141	891	<=	acr1, Fatty acyl-CoA reductase	acr1	ACX60_RS01360	ABUW_0260	A1S_3224	KZA74_01350	632.783	-0.284493	-0.369746	1.36849	0.973209	0.837046	4.81302e-06
chromosome	KZA74_01360	284,837..285,172	336	<=	KZA74_01360	NA	ACX60_RS01370	NA	NA	KZA74_01360	62.379	0.544863	0.854709	-1.49951	0.973209	0.837046	0.0050974
chromosome	KZA74_01385	290,544..291,236	693	<=	KZA74_01385	NA	ACX60_RS01395	ABUW_0264	A1S_3886	KZA74_01385	164.513	0.571402	0.756611	-0.233921	0.973209	0.837046	0.71757
chromosome	KZA74_01420	299,341..300,288	948	=>	KZA74_01420	NA	ACX60_RS01430	ABUW_0271	A1S_3884	KZA74_01420	777.455	-0.256401	-0.295125	-0.60791	0.973209	0.837046	0.0113014
chromosome	KZA74_01435	300,696..301,580	885	<=	KZA74_01435	NA	ACX60_RS01445	ABUW_0274	A1S_3212	KZA74_01435	299.059	0.682879	0.662303	-1.96947	0.973209	0.837046	8.66915e-06
chromosome	gltX	303,484..304,992	1509	<=	gltX, glutamate--tRNA ligase	EARS, gltX	ACX60_RS01465	ABUW_0278	A1S_3209	KZA74_01455	2139.37	-0.254909	-0.600363	1.48199	0.973209	0.837046	0.00053736
chromosome	ftsI	308,296..310,128	1833	=>	ftsI, penicillin-binding protein PBP3	ftsI	ACX60_RS01490	ABUW_0283	A1S_3204	KZA74_01480	1714.1	-0.318382	-0.341406	0.428813	0.973209	0.837046	0.154024
chromosome	KZA74_01485	310,132..311,631	1500	=>	murE, UDP-N-acetylmuramoyl-L-alanyl-D-glutamate--2, 6-diaminopimelate ligase	murE	ACX60_RS01495	ABUW_0284	A1S_3203	KZA74_01485	1336.82	-0.356768	-0.323259	0.415778	0.973209	0.837046	0.182398
chromosome	mraY	313,041..314,159	1119	=>	mraY, phospho-N-acetylmuramoyl-pentapeptide-transferase	mraY	ACX60_RS01505	ABUW_0286	A1S_3200	KZA74_01495	1420.93	-0.42612	-0.52153	0.827131	0.973209	0.837046	0.0777338
chromosome	ponA	315,397..317,952	2556	<=	ponA, mrcA, penicillin-binding protein PBP1a	mrcA, pbp1a	ACX60_RS01520	ABUW_0289	A1S_3196	KZA74_01510	2783.17	-0.501099	-0.378505	1.24926	0.973209	0.837046	0.000133668
chromosome	KZA74_01525	319,811..320,551	741	=>	pilO, type 4a pilus biogenesis protein PilO	pilO	ACX60_RS01535	ABUW_0292	A1S_3193	KZA74_01525	213.972	0.474282	0.772385	-2.07441	0.973209	0.837046	2.08733e-05
chromosome	KZA74_01535	321,157..323,322	2166	=>	pilQ, type IV pilus secretin PilQ	pilQ	ACX60_RS01545	ABUW_0294	A1S_3191	KZA74_01535	684.957	0.285284	0.459793	-1.30029	0.973209	0.837046	0.00111359
chromosome	aroK	323,334..323,903	570	=>	aroK, shikimate kinase AroK	E2.7.1.71, aroK, aroL	ACX60_RS01550	ABUW_0295	A1S_3190	KZA74_01540	479.57	-0.317028	-0.393881	0.555593	0.973209	0.837046	0.160412
chromosome	aroB	323,932..325,014	1083	=>	aroB, 3-dehydroquinate synthase	aroB	ACX60_RS01555	ABUW_0296	A1S_3187	KZA74_01545	1482.62	-0.393321	-0.432387	0.521642	0.973209	0.837046	0.23447
chromosome	KZA74_01550	325,030..325,905	876	=>	KZA74_01550	NA	ACX60_RS01560	ABUW_0297	A1S_3186	KZA74_01550	661.073	-0.236309	-0.279163	1.14797	0.973209	0.837046	3.11606e-05
chromosome	gltB	326,366..330,841	4476	=>	gltB, glutamate synthase large subunit	gltB	ACX60_RS01565	ABUW_0298	A1S_3185	KZA74_01555	12281.1	-0.407858	-1.11493	1.66943	0.973209	0.837046	0.0307969
chromosome	KZA74_01560	330,912..332,333	1422	=>	gltD, glutamate synthase subunit beta	gltD	ACX60_RS01570	ABUW_0299	A1S_3182	KZA74_01560	2857.44	-0.493277	-0.994897	1.31025	0.973209	0.837046	0.0368119
chromosome	KZA74_01570	333,525..334,115	591	=>	lemA, lipoprotein	lemA	ACX60_RS01580	ABUW_0301	A1S_3180	KZA74_01570	1538.97	-0.493187	-0.948079	-0.138071	0.973209	0.837046	0.868975
chromosome	KZA74_01575	334,137..335,219	1083	=>	TPM domain protein	TPM, K06872	ACX60_RS01585	ABUW_0302	A1S_3179	KZA74_01575	1251.36	-0.554828	-0.802489	-1.15523	0.973209	0.837046	0.0481017
chromosome	KZA74_01665	351,757..352,182	426	=>	type IV pilin protein	pilE	ACX60_RS01670	ABUW_0319	A1S_3165	KZA74_01665	71.59	0.268075	0.713086	0.0555948	0.973209	0.837046	0.912059
chromosome	rplS	354,142..354,510	369	=>	rplS, 50S ribosomal protein L19	RP-L19, MRPL19, rplS	ACX60_RS01690	ABUW_0323	A1S_3161	KZA74_01685	4840.51	0.949393	-1.07897	3.37121	0.973209	0.837046	7.52837e-05
chromosome	serA	361,102..362,334	1233	<=	serA, phosphoglycerate dehydrogenase	serA, PHGDH	ACX60_RS01730	ABUW_0331	A1S_3152	KZA74_01725	4014.16	0.430094	-0.897027	1.83504	0.973209	0.837046	0.0114545
chromosome	KZA74_01730	362,714..364,123	1410	=>	FAD-binding oxidoreductase	NA	ACX60_RS01735	ABUW_0332	A1S_3151	KZA74_01730	3091.12	0.304219	-0.613393	1.17204	0.973209	0.837046	0.048706
chromosome	astB	384,869..386,212	1344	=>	astB, N-succinylarginine dihydrolase	astB	ACX60_RS01835	ABUW_0354	A1S_3129	KZA74_01830	1645.81	-0.333748	-0.600122	-0.753054	0.973209	0.837046	0.231579
chromosome	KZA74_01845	388,617..388,925	309	=>	KZA74_01845	NA	ACX60_RS01850	ABUW_0357	NA	KZA74_01845	65.0887	0.497249	0.60741	-0.538458	0.973209	0.837046	0.310613
chromosome	KZA74_01865	391,509..392,375	867	<=	gltR_1, LysR family transcriptional regulator	gltR	ACX60_RS01870	ABUW_0361	A1S_3123	KZA74_01865	301.157	0.427767	0.635972	-2.59921	0.973209	0.837046	1.90013e-05
chromosome	KZA74_01875	393,380..394,495	1116	<=	S41 family peptidase	NA	ACX60_RS01880	NA	A1S_3121	KZA74_01875	311.652	0.627743	0.755011	-1.1643	0.973209	0.837046	0.00218069
chromosome	KZA74_01880	394,681..394,890	210	=>	yciI family protein, GTP cyclohydrolase	yciI	ACX60_RS01885	ABUW_0363	NA	KZA74_01880	82.9085	0.777662	0.746339	-3.79336	0.973209	0.837046	8.35966e-09
chromosome	KZA74_01885	394,962..395,792	831	<=	KZA74_01885	NA	ACX60_RS01890	NA	A1S_3880	KZA74_01885	195.94	0.563257	0.611776	0.399044	0.973209	0.837046	0.325486
chromosome	glyS	396,016..398,085	2070	<=	glyS, glycine--tRNA ligase subunit beta	glyS	ACX60_RS01895	ABUW_0366	A1S_3119	KZA74_01890	2732.35	-0.470522	-0.915524	1.11949	0.973209	0.837046	0.0243601
chromosome	glyQ	398,085..399,062	978	<=	glyQ, glycine--tRNA ligase subunit alpha	glyQ	ACX60_RS01900	ABUW_0367	A1S_3118	KZA74_01895	1942.2	-0.266142	-0.645672	1.00233	0.973209	0.837046	0.0604694
chromosome	KZA74_01935	407,463..409,766	2304	=>	KZA74_01935	NA	ACX60_RS01940	ABUW_0375	A1S_3110	KZA74_01935	1502.85	-0.392514	-0.503255	0.593165	0.973209	0.837046	0.231827
chromosome	mlaE	419,093..419,869	777	=>	mlaE, lipid asymmetry maintenance ABC transporterpermease subunit MlaE	mlaE, linK	ACX60_RS01985	ABUW_0384	A1S_3102	KZA74_01980	2064.34	-0.524724	-0.762523	0.735103	0.973209	0.837046	0.183655
chromosome	KZA74_01985	419,869..420,549	681	=>	mlaD, outer membrane lipid asymmetry maintenanceprotein MlaD	mlaD, linM	ACX60_RS01990	ABUW_0385	A1S_3101	KZA74_01985	1891.69	-0.340416	-0.802608	1.26664	0.973209	0.837046	0.0430469
chromosome	KZA74_02010	423,353..423,754	402	=>	mutT, DNA mismatch repair, NUDIX domain-containing protein	mutT, NUDT15, MTH2	ACX60_RS02015	ABUW_0390	NA	KZA74_02010	318.743	-0.536278	-0.595633	0.137324	0.973209	0.837046	0.740172
chromosome	KZA74_02045	432,204..433,469	1266	=>	gltP_1, dicarboxylate/amino acid:cation symporter	gltP	ACX60_RS02050	ABUW_0397	A1S_3089	KZA74_02045	1167.1	-0.147917	-0.334458	0.207954	0.973209	0.837046	0.493418
chromosome	KZA74_02065	435,994..436,758	765	<=	hmp, flavohemoprotein	hmp	ACX60_RS02070	ABUW_0401	A1S_3085	KZA74_02065	590.946	-0.409464	-0.542746	1.34794	0.973209	0.837046	0.007235
chromosome	rplB	442,783..443,607	825	=>	rplB, 50S ribosomal protein L2	RP-L2, MRPL2, rplB	ACX60_RS02110	ABUW_0409	A1S_3077	KZA74_02110	19098.8	-0.54195	-1.8192	1.95384	0.973209	0.837046	0.0702708
chromosome	rpsS	443,621..443,896	276	=>	rpsS, 30S ribosomal protein S19	RP-S19, rpsS	ACX60_RS02115	ABUW_0410	NA	KZA74_02115	6661.87	-0.623224	-1.92286	1.85549	0.973209	0.837046	0.089686
chromosome	rplV	443,908..444,237	330	=>	rplV, 50S ribosomal protein L22	RP-L22, MRPL22, rplV	ACX60_RS02120	ABUW_0411	A1S_3076	KZA74_02120	6450.93	-0.548144	-1.83623	2.11464	0.973209	0.837046	0.050646
chromosome	rpsC	444,239..444,991	753	=>	rpsC, 30S ribosomal protein S3	RP-S3, rpsC	ACX60_RS02125	ABUW_0412	A1S_3075	KZA74_02125	14518.4	-0.718218	-2.15284	1.72218	0.973209	0.837046	0.118869
chromosome	rplP	444,995..445,408	414	=>	rplP, 50S ribosomal protein L16	RP-L16, MRPL16, rplP	ACX60_RS02130	ABUW_0413	A1S_3074	KZA74_02130	11567	-0.780019	-1.94956	1.90031	0.973209	0.837046	0.0973328
chromosome	rplX	446,330..446,647	318	=>	rplX, 50S ribosomal protein L24	RP-L24, MRPL24, rplX	ACX60_RS02150	ABUW_0417	A1S_3070	KZA74_02150	7200.83	-0.681906	-1.80206	1.06254	0.973209	0.837046	0.317984
chromosome	rpsN	447,209..447,514	306	=>	rpsN, 30S ribosomal protein S14	RP-S14, MRPS14, rpsN	ACX60_RS02160	ABUW_0419	A1S_3068	KZA74_02160	6661	-0.512321	-1.591	1.10187	0.973209	0.837046	0.293279
chromosome	rpsH	447,526..447,921	396	=>	rpsH, 30S ribosomal protein S8	RP-S8, rpsH	ACX60_RS02165	ABUW_0420	A1S_3067	KZA74_02165	5597.71	-0.747308	-1.53166	1.38486	0.973209	0.837046	0.202449
chromosome	rplF	447,935..448,468	534	=>	rplF, 50S ribosomal protein L6	RP-L6, MRPL6, rplF	ACX60_RS02170	ABUW_0421	A1S_3066	KZA74_02170	13881.5	-0.610741	-1.63379	1.48858	0.973209	0.837046	0.178128
chromosome	rplR	448,483..448,833	351	=>	rplR, 50S ribosomal protein L18	RP-L18, MRPL18, rplR	ACX60_RS02175	ABUW_0422	A1S_3065	KZA74_02175	5797.75	-0.558406	-1.75709	1.65831	0.973209	0.837046	0.108332
chromosome	rpmJ	451,346..451,462	117	=>	rpmJ, 50S ribosomal protein L36	RP-L36, MRPL36, rpmJ	ACX60_RS02200	ABUW_0427	NA	KZA74_02200	2878.17	-0.586247	-1.53932	1.08583	0.973209	0.837046	0.290303
chromosome	KZA74_02245	457,738..458,127	390	=>	membrane protein	mp	ACX60_RS02245	ABUW_0436	A1S_3878	KZA74_02245	46.3111	0.479266	0.932245	-1.52453	0.973209	0.837046	0.0063089
chromosome	KZA74_02250	458,897..459,982	1086	=>	KZA74_02250	NA	ACX60_RS02250	ABUW_0438	A1S_3051	KZA74_02250	1082.4	-0.484413	-0.708382	-0.563487	0.973209	0.837046	0.142534
chromosome	KZA74_02260	460,815..463,010	2196	=>	TRAP transporter large permease subunit	TRAP	ACX60_RS02260	ABUW_0440	A1S_3049	KZA74_02260	1702.49	-0.29961	-0.570144	-0.300259	0.973209	0.837046	0.50943
chromosome	KZA74_02275	463,852..465,906	2055	<=	M3 family metallopeptidase	prlC	ACX60_RS02275	ABUW_0443	A1S_3046	KZA74_02275	4446.88	-0.65438	-0.576932	1.38375	0.973209	0.837046	0.016
chromosome	KZA74_02375	482,997..484,085	1089	<=	PhoH family protein	ybeZ, phoH, phoL	ACX60_RS02375	ABUW_0463	A1S_3030	KZA74_02375	2948.77	-0.330859	-0.5783	1.12179	0.973209	0.837046	0.0439311
chromosome	miaB	484,123..485,574	1452	<=	miaB, tRNA (N6-isopentenyl adenosine(37)-C2)-methylthiotransferase MiaB	miaB	ACX60_RS02380	ABUW_0464	A1S_3028	KZA74_02380	2451.76	-0.271544	-0.571426	2.15419	0.973209	0.837046	3.35995e-06
chromosome	KZA74_02395	488,738..489,724	987	=>	malate dehydrogenase	mdh	ACX60_RS02395	ABUW_0467	A1S_3025	KZA74_02395	3838.65	0.499246	-0.881713	1.54431	0.973209	0.837046	0.0329798
chromosome	KZA74_02410	490,776..491,381	606	<=	2OG-Fe(II) oxygenase	K07394	ACX60_RS02410	ABUW_0470	A1S_3022	KZA74_02410	215.394	0.413682	0.573366	-0.188002	0.973209	0.837046	0.746254
chromosome	rlmJ	491,499..492,356	858	=>	rlmJ, 23S rRNA (adenine(2030)-N(6))-methyltransferaseRlmJ	rlmJ	ACX60_RS02415	ABUW_0471	A1S_3021	KZA74_02415	2085.32	-0.311693	-0.860457	1.32527	0.973209	0.837046	0.0215991
chromosome	KZA74_02450	ND	ND	ND	rrf, 5S ribosomal RNA	rrf	NA	NA	A1S_r	KZA74_02450	38.4505	0.573201	0.91103	-8.49343	0.973209	0.837046	1.0123e-09
chromosome	KZA74_02455	500,249..500,599	351	=>	GFA family protein	GFA	ACX60_RS02455	ABUW_0479	A1S_3014	KZA74_02455	139.218	0.463592	0.694469	-2.16778	0.973209	0.837046	0.00215799
chromosome	rsmA	515,712..516,524	813	=>	rsmA, 16S rRNA(adenine(1518)-N(6)/adenine(1519)-N(6))- dimethyltransferase RsmA	ksgA	ACX60_RS02535	ABUW_0496	A1S_2998	KZA74_02535	982.908	-0.258589	-0.749576	0.837397	0.973209	0.837046	0.0423134
chromosome	KZA74_02575	523,114..524,125	1012	=>	metallophosphoesterase	K07098	ACX60_RS02575	ABUW_0504	A1S_2988	KZA74_02575	409.717	0.290763	0.400933	0.0376512	0.973209	0.837046	0.930143
chromosome	KZA74_02580	524,173..524,652	480	<=	psaB, OmpA family protein	NA	ACX60_RS02580	ABUW_0505	A1S_2987	KZA74_02580	483.652	-0.372288	-0.537993	1.33108	0.973209	0.837046	0.00962095
chromosome	KZA74_02590	525,896..526,399	504	<=	YfiR family protein	yfiR	ACX60_RS02590	ABUW_0507	A1S_2985	KZA74_02590	174.099	0.20749	0.407336	1.23582	0.973209	0.837046	0.00027394
chromosome	KZA74_02620	532,480..533,853	1374	<=	pdhD, dihydrolipoyl dehydrogenase	DLD, lpd, pdhD	ACX60_RS02620	ABUW_0513	A1S_2952	KZA74_02620	440.514	0.316116	0.476861	1.07256	0.973209	0.837046	2.95476e-06
chromosome	KZA74_02665	541,439..542,539	1101	<=	KZA74_02665	NA	ACX60_RS02670	NA	A1S_3860	KZA74_02665	250.679	0.195711	0.535058	0.756206	0.973209	0.837046	0.0239471
chromosome	KZA74_02680	544,744..545,841	1098	=>	PD-(D/E)XK nuclease family protein	NA	ACX60_RS02685	NA	A1S_2944	KZA74_02680	374.831	0.205136	0.3659	-0.650648	0.973209	0.837046	0.0556292
chromosome	KZA74_02700	548,729..548,947	219	<=	KZA74_02700	NA	ACX60_RS02705	ABUW_3336	A1S_3856	KZA74_02700	82.0273	0.580676	1.07324	-1.04553	0.973209	0.837046	0.0808886
chromosome	KZA74_02750	555,625..557,982	2358	=>	silP, heavy metal translocating P-type ATPase	cusP, ATP7, silP	ACX60_RS02750	ABUW_3325	A1S_2939	KZA74_02750	2366.12	-0.38314	-0.589506	0.697734	0.973209	0.837046	0.216986
chromosome	KZA74_02780	563,610..564,071	462	=>	KZA74_02780	NA	ACX60_RS02780	NA	NA	KZA74_02780	338.322	0.246064	0.479186	0.618313	0.973209	0.837046	0.0623668
chromosome	KZA74_02800	570,149..570,511	363	=>	copper-binding protein	cusF	ACX60_RS02800	NA	A1S_2931	KZA74_02800	627.724	-0.338056	-0.69879	0.738872	0.973209	0.837046	0.171019
chromosome	KZA74_02845	579,257..580,534	1278	<=	tyrosine-type recombinase/integrase	intS	ACX60_RS02840	NA	A1S_2927	KZA74_02845	394.145	0.265944	0.346983	0.317005	0.973209	0.837046	0.276119
chromosome	KZA74_02885	585,874..586,785	912	<=	bestrophin family protein	yneE, BEST	ACX60_RS02880	ABUW_0527	A1S_2919	KZA74_02885	442.869	0.62746	0.690713	-0.791821	0.973209	0.837046	0.0550132
chromosome	secF	588,984..589,949	966	<=	secF, protein translocase subunit SecF	secF	ACX60_RS02895	ABUW_0530	A1S_2915	KZA74_02900	1261.46	-0.450493	-0.721946	0.75234	0.973209	0.837046	0.104593
chromosome	secD	589,958..591,859	1902	<=	secD, protein translocase subunit SecD	secD	ACX60_RS02900	ABUW_0531	A1S_2914	KZA74_02905	3096.08	-0.457374	-0.936031	1.1827	0.973209	0.837046	0.0453689
chromosome	yajC	591,911..592,240	330	<=	yajC, preprotein translocase subunit YajC	yajC	ACX60_RS02905	ABUW_0532	A1S_2913	KZA74_02910	558.335	-0.287346	-0.77748	1.71688	0.973209	0.837046	9.3666e-05
chromosome	tgt	592,339..593,472	1134	<=	tgt, tRNA guanosine(34) transglycosylase Tgt	tgt, QTRT1	ACX60_RS02910	ABUW_0533	A1S_2912	KZA74_02915	1030.16	-0.223706	-0.467631	0.982785	0.973209	0.837046	0.00122019
chromosome	KZA74_02925	594,303..595,331	1029	<=	KZA74_02925	NA	ACX60_RS02920	ABUW_0535	A1S_3846	KZA74_02925	276.453	0.362303	0.478267	-0.784576	0.973209	0.837046	0.0410257
chromosome	KZA74_02955	600,022..600,255	234	<=	helix-turn-helix transcriptional regulator	NA	ACX60_RS02950	NA	NA	KZA74_02955	58.7337	0.454316	0.976713	0.902269	0.973209	0.837046	0.0166963
chromosome	KZA74_02960	600,412..601,188	777	=>	KZA74_02960	NA	ACX60_RS02955	NA	A1S_3844	KZA74_02960	150.055	0.378122	0.768106	-1.57743	0.973209	0.837046	0.000835391
chromosome	KZA74_02965	601,243..604,995	3753	<=	GreA/GreB family elongation factor	greA	ACX60_RS02960	NA	A1S_2907	KZA74_02965	340.199	-0.397501	0.449284	-0.356499	0.973209	0.837046	0.462995
chromosome	KZA74_02970	605,442..606,332	891	=>	KZA74_02970	NA	ACX60_RS02965	NA	A1S_3843	KZA74_02970	193.555	0.243334	0.312725	-0.503511	0.973209	0.837046	0.125887
chromosome	KZA74_02980	606,838..608,106	1269	=>	HAMP domain-containing histidine kinase	rcsC_2	ACX60_RS02975	ABUW_0585	A1S_2906	KZA74_02980	2135.63	-0.734554	-0.498538	0.5562	0.973209	0.837046	0.251931
chromosome	KZA74_03005	613,882..614,637	756	=>	polysaccharide deacetylase family protein	pda1	ACX60_RS03000	ABUW_0590	A1S_2901	KZA74_03005	471.327	-0.33956	-0.311866	0.437073	0.973209	0.837046	0.0521014
chromosome	wecB	618,347..619,474	1128	=>	wecB, UDP-N-acetylglucosamine 2-epimerase(non-hydrolyzing)	wecB	ACX60_RS03025	ABUW_0595|ABUW_3829	A1S_2897	KZA74_03030	255.373	0.298009	0.546323	0.0174034	0.973209	0.837046	0.968475
chromosome	KZA74_03035	619,476..620,249	774	<=	glycosyl transferase	gtrOC9	ACX60_RS03030	ABUW_0596	A1S_2896	KZA74_03035	234.105	0.418878	0.692702	2.44508	0.973209	0.837046	2.07799e-13
chromosome	KZA74_03065	627,323..627,769	447	<=	KZA74_03065	NA	ACX60_RS03060	ABUW_0602	A1S_2890	KZA74_03065	355.791	-0.233464	-0.285868	1.00015	0.973209	0.837046	1.10089e-05
chromosome	KZA74_03075	628,356..628,838	483	<=	psiE, phosphate-starvation-inducible PsiE familyprotein	psiE	ACX60_RS03070	ABUW_0604	A1S_2888	KZA74_03075	124.951	0.673886	0.792834	0.629814	0.973209	0.837046	0.167857
chromosome	KZA74_03105	635,938..637,380	1443	<=	YdiU family protein	ydiU	ACX60_RS03100	ABUW_0610	A1S_2882	KZA74_03105	853.977	-0.236865	-0.280843	0.0941809	0.973209	0.837046	0.756591
chromosome	KZA74_03115	638,875..639,405	531	=>	META domain-containing protein	NA	ACX60_RS03110	ABUW_0612	A1S_2880	KZA74_03115	291.462	-0.319456	-0.354527	-0.23994	0.973209	0.837046	0.422964
chromosome	accD	649,663..650,559	897	=>	accD, acetyl-CoA carboxylase, carboxyltransferasesubunit beta	accD	ACX60_RS03165	ABUW_0623	A1S_2869	KZA74_03170	2578.39	-0.464926	-0.903591	0.324652	0.973209	0.837046	0.665835
chromosome	folC	650,556..651,842	1287	=>	folC, bifunctional tetrahydrofolatesynthase/dihydrofolate synthase	folC	ACX60_RS03170	ABUW_0624	A1S_2867	KZA74_03175	1019.01	-0.438693	-0.419849	0.612956	0.973209	0.837046	0.0519798
chromosome	KZA74_03180	651,833..652,903	1071	=>	SPOR domain-containing protein	dedD	ACX60_RS03175	ABUW_0625	A1S_2866	KZA74_03180	1156.98	-0.327396	-0.545379	-0.388325	0.973209	0.837046	0.290105
chromosome	KZA74_03190	653,498..654,310	813	<=	MBL fold metallo-hydrolase	NA	ACX60_RS03185	ABUW_0627	A1S_2864	KZA74_03190	339.948	0.418907	0.430874	-0.540948	0.973209	0.837046	0.241208
chromosome	KZA74_03195	654,615..655,256	642	<=	peroxiredoxin	NA	ACX60_RS03190	ABUW_0628	A1S_2863	KZA74_03195	643.095	0.250537	0.363445	3.15722	0.973209	0.837046	8.39535e-31
chromosome	secA	655,664..658,387	2724	=>	secA, preprotein translocase subunit SecA	secA	ACX60_RS03195	ABUW_0629	A1S_2862	KZA74_03200	5630.26	-0.830842	-0.84562	1.41101	0.973209	0.837046	0.0183341
chromosome	KZA74_03225	662,465..662,884	420	=>	GNAT family N-acetyltransferase	NA	ACX60_RS03220	ABUW_0634	A1S_2857	KZA74_03225	275.622	-0.321688	-0.246401	-0.879624	0.973209	0.837046	0.000307728
chromosome	KZA74_03235	663,790..664,044	255	<=	KZA74_03235	NA	ACX60_RS03230	ABUW_0636	A1S_2855	KZA74_03235	175.271	-0.442978	-0.455031	0.994309	0.973209	0.837046	0.0166364
chromosome	KZA74_03260	670,237..671,469	1233	=>	carbohydrate porin	oprB	ACX60_RS03255	ABUW_0641	A1S_2849	KZA74_03260	5233.82	-0.926667	-0.991235	0.673124	0.973209	0.837046	0.410892
chromosome	KZA74_03265	671,643..674,048	2406	=>	glucose/quinate/shikimate family membrane-bound PQQ-dependent dehydrogenase	gcd	ACX60_RS03260	ABUW_0642	A1S_2847	KZA74_03265	8038.99	-0.971041	-1.23739	0.764978	0.973209	0.837046	0.343921
chromosome	KZA74_03270	674,215..675,858	1644	=>	nitrite/sulfite reductase	cysI	ACX60_RS03265	ABUW_0643	A1S_2846	KZA74_03270	1662.06	-0.356731	-0.424396	1.53856	0.973209	0.837046	4.12024e-06
chromosome	KZA74_03275	675,851..676,336	486	=>	DUF934 domain-containing protein	NA	ACX60_RS03270	ABUW_0644	A1S_2845	KZA74_03275	594.799	-0.556383	-0.776232	1.49437	0.973209	0.837046	0.00147047
chromosome	KZA74_03305	680,761..680,919	159	<=	KZA74_03305		ACX60_RS03300	NA	NA	KZA74_03305	47.5336	0.38315	0.573694	0.422547	0.973209	0.837046	0.349308
chromosome	KZA74_03345	689,528..689,818	291	<=	peptidylprolyl isomerase	ppiC	ACX60_RS03340	ABUW_0658	A1S_2832	KZA74_03345	213.093	-0.412926	-0.289007	-0.104301	0.973209	0.837046	0.737649
chromosome	KZA74_03375	695,783..696,607	825	<=	sel1 repeat family protein	NA	ACX60_RS03370	ABUW_0664	A1S_2826	KZA74_03375	392.432	-0.234858	-0.32217	0.757299	0.973209	0.837046	0.00338839
chromosome	KZA74_03380	696,790..697,500	711	<=	DsbC family protein	dsbC	ACX60_RS03375	ABUW_0665	A1S_2825	KZA74_03380	297.785	0.613523	0.778727	2.14863	0.973209	0.837046	7.55366e-10
chromosome	KZA74_03390	698,585..699,034	450	=>	SRPBCC family protein	NA	ACX60_RS03385	ABUW_0667	A1S_2823	KZA74_03390	675.806	-0.806074	-0.56194	-0.6718	0.973209	0.837046	0.247487
chromosome	KZA74_03395	699,176..699,532	357	=>	DUF488 domain-containing protein	NA	ACX60_RS03390	ABUW_0668	A1S_2822	KZA74_03395	72.1669	0.704181	0.636325	-1.43631	0.973209	0.837046	0.00132308
chromosome	KZA74_03410	700,574..702,289	1716	<=	proline--tRNA ligase	PARS, proS	ACX60_RS03405	ABUW_0674	A1S_2819	KZA74_03410	2554.67	-0.368435	-0.692857	1.13059	0.973209	0.837046	0.00977223
chromosome	KZA74_03425	706,640..707,278	639	<=	KZA74_03425	NA	ACX60_RS03420	ABUW_0677	A1S_2816	KZA74_03425	118.409	0.430144	0.69409	-3.27268	0.973209	0.837046	8.78461e-07
chromosome	KZA74_03470	717,720..718,628	909	<=	DUF1853 family protein	K09977	ACX60_RS03465	ABUW_0688	A1S_2808	KZA74_03470	299.519	0.523292	0.715584	-1.35338	0.973209	0.837046	0.000373294
chromosome	KZA74_03515	720,825..721,610	786	<=	cysJ, membrane protein, YdcF family protein	cysJ, ydcF	ACX60_RS03510	ABUW_0697	A1S_2799	KZA74_03515	176.779	0.487464	0.575342	-1.24053	0.973209	0.837046	0.0206345
chromosome	KZA74_03525	724,441..725,016	576	<=	SdpI family protein	sdpI	ACX60_RS03520	ABUW_0699	A1S_2797	KZA74_03525	1351.23	-0.33242	-0.563893	1.12975	0.973209	0.837046	0.0515391
chromosome	KZA74_03535	727,419..728,633	1215	=>	multidrug effflux MFS transporter	bcr, tcaB	ACX60_RS03530	ABUW_0701	A1S_2795	KZA74_03535	799.629	-0.241119	-0.313538	0.046715	0.973209	0.837046	0.852355
chromosome	KZA74_03555	730,502..731,977	1476	=>	alanine:cation symporter family protein	alsT, TC.AGCS	ACX60_RS03545	ABUW_0704	A1S_2793	KZA74_03555	1309.84	-0.330543	-0.420315	-0.363616	0.973209	0.837046	0.349871
chromosome	KZA74_03580	738,339..739,088	750	<=	DUF4850 domain-containing protein	NA	ACX60_RS03570	ABUW_0708	A1S_2788	KZA74_03580	136.227	0.267097	0.54069	0.352512	0.973209	0.837046	0.507055
chromosome	gatA	743,180..744,658	1479	<=	gatA, Asp-tRNA(Asn)/Glu-tRNA(Gln) amidotransferasesubunit GatA	gatA, QRSL1	ACX60_RS03595	ABUW_0713	A1S_2783	KZA74_03605	2160.64	-0.347025	-0.792273	1.35175	0.973209	0.837046	0.00743634
chromosome	gatC	744,712..745,026	315	<=	gatC, Asp-tRNA(Asn)/Glu-tRNA(Gln) amidotransferasesubunit GatC	gatC, GATC	ACX60_RS03600	ABUW_0714	A1S_2782	KZA74_03610	349.128	-0.558758	-0.633801	1.10141	0.973209	0.837046	0.00332244
chromosome	KZA74_03640	749,808..749,981	174	=>	KZA74_03640		ACX60_RS03630	ABUW_0720	NA	KZA74_03640	1675.3	-0.592489	0.914906	1.91235	0.973209	0.837046	0.0422161
chromosome	KZA74_03660	753,172..754,683	1512	<=	outer membrane protein transport protein	fadL	ACX60_RS03650	ABUW_0724	A1S_2773	KZA74_03660	6100.7	-0.612996	-0.928812	0.300183	0.973209	0.837046	0.709257
chromosome	KZA74_03670	756,143..757,177	1035	=>	AraC family transcriptional regulator	NA	ACX60_RS03660	ABUW_0726	A1S_2771	KZA74_03670	337.669	0.408448	0.399115	-0.0322307	0.973209	0.837046	0.937139
chromosome	KZA74_03710	763,633..764,988	1356	<=	amino acid permease	TC.AAT	ACX60_RS03700	ABUW_0817	A1S_2762	KZA74_03710	2339.25	-0.348207	-0.557545	1.59396	0.973209	0.837046	0.00474624
chromosome	KZA74_03725	767,686..768,054	369	=>	MmcQ/YjbR family DNA-binding protein	yjbR, mmcQ	ACX60_RS03715	ABUW_0820	A1S_2759	KZA74_03725	93.2251	0.388256	0.416454	-0.56049	0.973209	0.837046	0.152207
chromosome	KZA74_03775	778,292..778,990	699	<=	phosphatase PAP2 family protein	pap2	ACX60_RS03765	ABUW_0830	A1S_2749	KZA74_03775	162.398	0.576626	0.627963	-1.6154	0.973209	0.837046	0.00518968
chromosome	KZA74_03800	783,822..784,406	585	=>	class I SAM-dependent methyltransferase	NA	ACX60_RS03790	NA	A1S_2744	KZA74_03800	124.841	0.805705	0.912824	-2.84547	0.973209	0.837046	7.05383e-05
chromosome	KZA74_03810	787,539..788,216	678	=>	KZA74_03810	NA	ACX60_RS03800	ABUW_0837	A1S_2741	KZA74_03810	292.467	0.505042	0.543543	-0.366175	0.973209	0.837046	0.357976
chromosome	KZA74_03815	788,242..789,048	807	=>	SDR family NAD(P)-dependent oxidoreductase	NA	ACX60_RS03805	ABUW_0838	A1S_2740	KZA74_03815	734.44	-0.187086	-0.390541	0.1225	0.973209	0.837046	0.68604
chromosome	KZA74_03825	789,534..789,968	435	<=	YbjQ family protein	NA	ACX60_RS03815	ABUW_0840	A1S_2739	KZA74_03825	223.05	-0.42338	-0.428919	-0.198349	0.973209	0.837046	0.600442
chromosome	adeJ	791,890..795,066	3177	<=	adeJ, multidrug efflux RND transporter permeasesubunit AdeJ	adeJ	ACX60_RS03830	ABUW_0843	A1S_2736	KZA74_03840	13130.4	-0.828359	-1.21369	0.662431	0.973209	0.837046	0.476412
chromosome	adeI	795,079..796,329	1251	<=	adeI, multidrug efflux RND transporter periplasmicadaptor subunit AdeI	adeI	ACX60_RS03835	ABUW_0844	A1S_2735	KZA74_03845	4083.46	-0.751696	-1.21834	0.898395	0.973209	0.837046	0.272428
chromosome	KZA74_03860	799,240..800,217	978	<=	polyprenyl synthetase family protein	ispB	ACX60_RS03850	ABUW_0847	A1S_2732	KZA74_03860	685.182	-0.316021	-0.27958	0.313686	0.973209	0.837046	0.267789
chromosome	rplU	800,661..800,972	312	=>	rplU, 50S ribosomal protein L21	RP-L21, MRPL21, rplU	ACX60_RS03860	ABUW_0848	A1S_2731	KZA74_03870	8324.38	0.571135	-1.09148	2.52931	0.973209	0.837046	0.0125114
chromosome	rpmA	800,991..801,248	258	=>	rpmA, 50S ribosomal protein L27	RP-L27, MRPL27, rpmA	ACX60_RS03865	ABUW_0849	A1S_2730	KZA74_03875	3232.09	0.710782	-1.10234	1.04775	0.973209	0.837046	0.2971
chromosome	KZA74_03885	802,312..803,100	789	=>	RsiV family protein	NA	ACX60_RS03875	ABUW_0851	A1S_2728	KZA74_03885	660.31	-0.395887	-0.706386	-0.590851	0.973209	0.837046	0.389623
chromosome	serS	803,219..804,490	1272	=>	serS, serine--tRNA ligase	SARS, serS	ACX60_RS03880	ABUW_0852	A1S_2726	KZA74_03890	2255.6	-0.729443	-1.07187	0.761785	0.973209	0.837046	0.158083
chromosome	cysG	804,558..805,931	1374	=>	cysG, siroheme synthase CysG	cysG	ACX60_RS03885	ABUW_0853	A1S_2697	KZA74_03895	1596.33	-0.437385	-0.487455	0.264509	0.973209	0.837046	0.537624
chromosome	lipB	811,079..811,732	654	<=	lipB, lipoyl(octanoyl) transferase LipB	lipB	ACX60_RS03920	ABUW_0860	A1S_2704	KZA74_03930	751.318	-0.413655	-0.375034	1.09522	0.973209	0.837046	0.00395025
chromosome	KZA74_03995	824,193..824,322	130	=>	KZA74_03995 maybe 5'UTR for sucA?	NA	NA	NA	NA	KZA74_03995	130.857	0.536786	0.953618	5.77857	0.973209	0.837046	5.66688e-40
chromosome	KZA74_04000	824,343..824,477	135	<=	KZA74_04000 antisense to 3995 and sucA in between them	NA	NA	NA	NA	KZA74_04000	622.751	-0.712949	-1.00127	-8.23664	0.973209	0.837046	3.88706e-33
chromosome	KZA74_04005	824,480..827,320	2841	=>	sucA, 2-oxoglutarate dehydrogenase E1 component	OGDH, sucA	ACX60_RS03985	ABUW_0872	A1S_2715	KZA74_04005	13201.9	-0.757222	-1.17438	1.02428	0.973209	0.837046	0.210457
chromosome	odhB	827,320..828,516	1197	=>	sucB, odhB, 2-oxoglutarate dehydrogenase complex dihydrolipoyllysine-residue succinyltransferase	DLST, sucB	ACX60_RS03990	ABUW_0873	A1S_2716	KZA74_04010	6643.12	-0.497905	-1.06156	0.897052	0.973209	0.837046	0.298515
chromosome	sucC	830,160..831,326	1167	=>	sucC, ADP-forming succinate--CoA ligase subunit beta	sucC	ACX60_RS04000	ABUW_0875	A1S_2718	KZA74_04020	5178.17	-0.740523	-1.21132	0.471882	0.973209	0.837046	0.61888
chromosome	sucD	831,341..832,231	891	=>	sucD, succinate--CoA ligase subunit alpha	sucD	ACX60_RS04005	ABUW_0876	A1S_2719	KZA74_04025	5367.14	-0.487015	-1.12504	1.14931	0.973209	0.837046	0.21603
chromosome	KZA74_04040	834,821..835,720	900	=>	neutral zinc metallopeptidase	K07054	ACX60_RS04020	ABUW_0883	A1S_2722	KZA74_04040	1759.12	-0.49627	-0.642547	0.052856	0.973209	0.837046	0.927142
chromosome	KZA74_04050	837,920..847,270	9351	=>	Ig-like domain-containing protein	NA	ACX60_RS04030	NA	A1S_2696	KZA74_04050	77184.3	-0.909675	-1.09615	-0.106105	0.973209	0.837046	0.905114
chromosome	KZA74_04065	850,792..851,508	717	<=	metalloprotease	NA	ACX60_RS04045	ABUW_0888	A1S_3829	KZA74_04065	222.587	0.401707	0.422522	0.24332	0.973209	0.837046	0.445524
chromosome	greA	854,479..854,955	477	<=	greA, transcription elongation factor GreA	greA	ACX60_RS04075	ABUW_0892	A1S_2688	KZA74_04095	641.662	0.282558	-0.637367	1.55738	0.973209	0.837046	0.000162966
chromosome	carB	855,043..858,273	3231	<=	carB, carbamoyl-phosphate synthase large subunit	carB, CPA2	ACX60_RS04080	ABUW_0893	A1S_2687	KZA74_04100	9271.27	-0.421317	-1.06606	1.77219	0.973209	0.837046	0.0130052
chromosome	KZA74_04140	865,258..865,572	315	=>	KZA74_04140	NA	ACX60_RS04120	ABUW_0901	A1S_2679	KZA74_04140	93.1316	0.197077	0.448936	0.125871	0.973209	0.837046	0.751992
chromosome	KZA74_04145	865,573..865,917	345	<=	KZA74_04145	NA	ACX60_RS04125	ABUW_0902	A1S_3828	KZA74_04145	104.744	0.343538	0.753046	-1.71417	0.973209	0.837046	0.00149284
chromosome	folD	868,462..869,310	849	=>	folD, bifunctional methylenetetrahydrofolate dehydrogenase/methenyltetrahydrofolate cyclohydrolase FolD	folD	ACX60_RS04150	ABUW_0907	A1S_2674	KZA74_04170	999.443	-0.276591	-0.513877	1.05092	0.973209	0.837046	0.000276845
chromosome	KZA74_04180	870,242..870,664	423	<=	KZA74_04180	NA	ACX60_RS04160	ABUW_0909	A1S_2672	KZA74_04180	310.326	-0.384548	-0.498829	1.10871	0.973209	0.837046	0.0278796
chromosome	KZA74_04185	870,781..872,112	1332	<=	MFS transporter	kgtP	ACX60_RS04165	ABUW_0910	A1S_2671	KZA74_04185	921.223	-0.274592	-0.421811	-0.359166	0.973209	0.837046	0.415403
chromosome	KZA74_04200	875,709..877,541	1833	<=	phosphoenolpyruvate carboxykinase (GTP)	E4.1.1.32, pckA, PCK	ACX60_RS04180	ABUW_0913	A1S_2668	KZA74_04200	5095.53	-0.340373	-1.09778	2.7228	0.973209	0.837046	2.56043e-06
chromosome	KZA74_04215	879,796..880,086	291	=>	groES, co-chaperone GroES	groS, groES, HSPE1	ACX60_RS04195	ABUW_0917	A1S_2665	KZA74_04215	1729.14	-0.586622	-0.895141	1.7933	0.973209	0.837046	0.0431206
chromosome	groL	880,145..881,779	1635	=>	groL, chaperonin GroEL	groL, groEL, HSPD1	ACX60_RS04200	ABUW_0918	A1S_2664	KZA74_04220	16213.5	-0.668988	-1.16764	1.16038	0.973209	0.837046	0.304551
chromosome	KZA74_04270	892,758..893,870	1113	<=	transglycosylase SLT domain-containing protein	NA	ACX60_RS04250	ABUW_0928	A1S_2654	KZA74_04270	865.013	-0.349738	-0.564449	1.1518	0.973209	0.837046	0.00428201
chromosome	greB	894,243..894,737	495	=>	greB, transcription elongation factor GreB	greB	ACX60_RS04255	ABUW_0929	A1S_2653	KZA74_04275	221.669	0.130722	0.312048	-0.130068	0.973209	0.837046	0.634317
chromosome	KZA74_04295	900,201..900,707	507	<=	N-acetyltransferase	yhbS	ACX60_RS04275	NA	A1S_2650	KZA74_04295	106.488	0.641468	0.768621	1.1113	0.973209	0.837046	0.025913
chromosome	KZA74_04305	901,277..901,696	420	=>	KZA74_04305	NA	ACX60_RS04285	NA	A1S_3826	KZA74_04305	50.2943	0.255743	0.50333	-0.851215	0.973209	0.837046	0.0758978
chromosome	KZA74_04340	906,581..907,159	579	=>	TetR/AcrR family transcriptional regulator	NA	ACX60_RS04320	NA	A1S_2647	KZA74_04340	84.8712	0.889388	1.03156	-4.1992	0.973209	0.837046	3.12131e-09
chromosome	KZA74_04350	908,211..908,828	618	=>	TetR/AcrR family transcriptional regulator	NA	ACX60_RS04330	NA	A1S_2645	KZA74_04350	126.497	0.717574	0.762722	-1.33242	0.973209	0.837046	0.0057939
chromosome	KZA74_04365	910,491..911,057	567	=>	TetR/AcrR family transcriptional regulator	nemR	ACX60_RS04345	ABUW_0942	A1S_2642	KZA74_04365	246.977	-0.178784	-0.368932	-0.759651	0.973209	0.837046	0.0125114
chromosome	KZA74_04410	921,539..922,945	1407	=>	amino acid permease	cycA	ACX60_RS04390	ABUW_0951	A1S_2633	KZA74_04410	2370.45	-0.64216	-0.8412	-0.222869	0.973209	0.837046	0.759879
chromosome	lysA	923,333..924,583	1251	=>	lysA, diaminopimelate decarboxylase	lysA	ACX60_RS04400	ABUW_0953	A1S_2632	KZA74_04420	925.079	-0.267441	-0.659043	0.862931	0.973209	0.837046	0.00878852
chromosome	KZA74_04455	932,461..934,107	1647	<=	glycosyltransferase family 39 protein	gtr	ACX60_RS04435	ABUW_0961	A1S_2625	KZA74_04455	283.524	0.607278	0.675142	-2.0557	0.973209	0.837046	8.30513e-05
chromosome	KZA74_04480	937,621..938,691	1071	<=	ABC transporter permease	ABC-2.P	ACX60_RS04460	ABUW_0966	A1S_2621	KZA74_04480	369.7	0.326987	0.488872	0.247242	0.973209	0.837046	0.527232
chromosome	lolD	947,151..947,837	687	=>	lolD, lipoprotein-releasing ABC transporterATP-binding protein LolD	lolD	ACX60_RS04500	ABUW_0975	A1S_2611	KZA74_04525	529.445	-0.381663	-0.446073	0.350098	0.973209	0.837046	0.295904
chromosome	KZA74_04530	947,923..950,355	2433	=>	DNA internalization-related competence protein ComEC/Rec2	comEC	ACX60_RS04505	ABUW_0976	A1S_2610	KZA74_04530	531.725	0.308197	0.529143	-0.840555	0.973209	0.837046	0.0195262
chromosome	KZA74_04545	952,459..953,268	810	=>	alpha/beta hydrolase	NA	ACX60_RS04520	ABUW_0979	A1S_2607	KZA74_04545	907.707	-0.303398	-0.5123	0.810961	0.973209	0.837046	0.047066
chromosome	purN	953,332..953,961	630	<=	purN, phosphoribosylglycinamide formyltransferase	purN	ACX60_RS04525	ABUW_0980	A1S_2606	KZA74_04550	560.571	-0.248199	-0.616255	1.03044	0.973209	0.837046	0.0097149
chromosome	hda	956,378..957,076	699	=>	hda, DnaA regulatory inactivator Hda	hda	ACX60_RS04540	ABUW_0983	A1S_2603	KZA74_04565	695.218	-0.364329	-0.460054	0.747611	0.973209	0.837046	0.0294991
chromosome	tolB	966,083..967,363	1281	<=	tolB, Tol-Pal system beta propeller repeat proteinTolB	tolB	ACX60_RS04590	ABUW_0993	A1S_2594	KZA74_04615	1248.12	-0.409856	-0.396582	2.03024	0.973209	0.837046	1.23289e-10
chromosome	tolR	968,864..969,316	453	<=	tolR, protein TolR	tolR	ACX60_RS04600	ABUW_0995	A1S_2592	KZA74_04625	239.955	-0.357518	-0.335878	0.64173	0.973209	0.837046	0.0120586
chromosome	tolQ	969,316..970,014	699	<=	tolQ	tolQ	ACX60_RS04605	ABUW_0996	A1S_2591	KZA74_04630	595.281	-0.310296	-0.361281	0.579305	0.973209	0.837046	0.0531663
chromosome	KZA74_04680	982,953..983,879	927	<=	AraC family transcriptional regulator	NA	ACX60_RS04655	NA	A1S_2582	KZA74_04680	220.375	0.19921	0.369809	-0.404755	0.973209	0.837046	0.254956
chromosome	KZA74_04740	1,001,863..1,002,732	870	<=	4'-phosphopantetheinyl transferase superfamilyprotein	NA	ACX60_RS04715	NA	A1S_2568	KZA74_04740	143.042	0.731632	0.687197	-1.86277	0.973209	0.837046	9.38722e-05
chromosome	KZA74_04800	1,016,829..1,018,415	1587	<=	transposase	tnsE	ACX60_RS04785	NA	A1S_2556	KZA74_04800	407.793	0.340881	0.557342	-1.6277	0.973209	0.837046	6.74812e-05
chromosome	KZA74_04835	1,025,660..1,025,815	156	=>	Bcr/CflA family drug resistance effluxtransporter	bcr, cflA	ACX60_RS04820	NA	NA	KZA74_04835	34.9325	0.583651	0.693922	-1.68039	0.973209	0.837046	0.0099751
chromosome	KZA74_04840	1,026,210..1,026,527	318	=>	NGG1p interacting factor NIF3	NIF3	ACX60_RS04825	ABUW_1005	A1S_2549	KZA74_04840	344.886	-0.440598	-0.478516	-1.71807	0.973209	0.837046	0.000130779
chromosome	KZA74_04860	1,028,790..1,029,251	462	<=	peroxiredoxin	BCP, PRXQ, DOT5	ACX60_RS04845	ABUW_1009	A1S_2545	KZA74_04860	262.957	0.360897	-0.236427	0.689204	0.973209	0.837046	0.0024039
chromosome	carO	1,033,093..1,033,821	729	=>	carO, ornithine uptake porin CarO type 4	carO	ACX60_RS04875	ABUW_1015	A1S_2538	KZA74_04890	21613.5	-0.869188	-1.24184	-0.4874	0.973209	0.837046	0.670339
chromosome	KZA74_04960	1,046,628..1,047,176	549	=>	GNAT family N-acetyltransferase	rimJ	ACX60_RS04945	NA	A1S_2523	KZA74_04960	170.793	0.341116	0.446469	0.235165	0.973209	0.837046	0.413942
chromosome	lepA	1,047,360..1,049,177	1818	=>	lepA, translation elongation factor 4	lepA	ACX60_RS04950	ABUW_1029	A1S_2522	KZA74_04965	3267.15	-0.308121	-0.814717	1.54196	0.973209	0.837046	0.00438901
chromosome	rnc	1,050,445..1,051,137	693	=>	rnc, ribonuclease III	rnc, DROSHA, RNT1	ACX60_RS04965	ABUW_1032	A1S_2519	KZA74_04980	502.502	-0.442958	-0.584509	1.52776	0.973209	0.837046	1.36613e-05
chromosome	KZA74_05050	1,061,826..1,063,055	1230	<=	pyridoxal phosphate-dependent aminotransferase	aspB	ACX60_RS05030	ABUW_1043	A1S_2508	KZA74_05050	2388.08	0.414389	-0.671124	1.75799	0.973209	0.837046	0.00143889
chromosome	uvrB	1,066,053..1,068,074	2022	=>	uvrB, excinuclease ABC subunit UvrB	uvrB	ACX60_RS05050	ABUW_1047	A1S_2504	KZA74_05070	4618.72	-0.445506	-0.718561	0.866512	0.973209	0.837046	0.18501
chromosome	KZA74_05165	1,087,994..1,088,734	741	<=	KZA74_05165	NA	ACX60_RS05145	ABUW_1066	A1S_2483	KZA74_05165	216.821	0.366949	0.704859	0.576544	0.973209	0.837046	0.102684
chromosome	KZA74_05245	1,106,861..1,109,623	2763	=>	insulinase family protein	pqqL	ACX60_RS05220	ABUW_1082	A1S_2470	KZA74_05245	2303.01	-0.446319	-0.462602	1.2206	0.973209	0.837046	0.00509399
chromosome	thiE	1,112,964..1,113,575	612	=>	thiE, thiamine phosphate synthase	thiE	ACX60_RS05245	ABUW_1097	A1S_2465	KZA74_05270	267.624	-0.367247	-0.371981	-0.0393732	0.973209	0.837046	0.916314
chromosome	KZA74_05285	1,115,815..1,116,453	639	=>	RluA family pseudouridine synthase	rluA	ACX60_RS05260	ABUW_1100	A1S_2463	KZA74_05285	507.413	-0.344862	-0.440534	0.43526	0.973209	0.837046	0.120786
chromosome	rapA	1,116,598..1,119,435	2838	=>	rapA, RNA polymerase-associated protein RapA	rapA	ACX60_RS05265	ABUW_1101	A1S_2462	KZA74_05290	3690.45	-0.329851	-0.601309	0.95552	0.973209	0.837046	0.032404
chromosome	KZA74_05305	1,121,510..1,122,580	1071	=>	ferredoxin reductase	NA	ACX60_RS05280	ABUW_1104	A1S_2459	KZA74_05305	5517.86	-0.596244	-1.06596	0.587399	0.973209	0.837046	0.506824
chromosome	KZA74_05315	1,123,754..1,124,329	576	<=	NAD(P)H-dependent oxidoreductase	NA	ACX60_RS05290	NA	A1S_2457	KZA74_05315	130.8	0.329099	0.435395	-0.997761	0.973209	0.837046	0.0275899
chromosome	KZA74_05325	1,125,464..1,126,165	702	<=	SIMPL domain-containing protein	NA	ACX60_RS05300	ABUW_1108	A1S_2455	KZA74_05325	456.277	-0.328769	0.373278	2.32894	0.973209	0.837046	1.39788e-16
chromosome	sohB	1,140,605..1,141,567	963	=>	sohB, protease SohB	sohB	ACX60_RS05355	ABUW_1119	A1S_2444	KZA74_05380	2865.15	-0.65838	-0.661265	0.632864	0.973209	0.837046	0.372572
chromosome	purB	1,144,804..1,146,192	1389	<=	purB, adenylosuccinate lyase	purB, ADSL	ACX60_RS05370	ABUW_1122	A1S_2441	KZA74_05395	2126.22	-0.41314	-0.768625	1.3966	0.973209	0.837046	0.0136175
chromosome	hflD	1,146,247..1,146,981	735	<=	hflD, high frequency lysogenization protein HflD	hflD	ACX60_RS05375	ABUW_1123	A1S_2440	KZA74_05400	393.649	-0.163911	-0.311851	0.582778	0.973209	0.837046	0.000913976
chromosome	mnmA	1,146,995..1,148,128	1134	<=	mnmA, tRNA 2-thiouridine(34) synthase MnmA	mnmA, trmU	ACX60_RS05380	ABUW_1124	A1S_2439	KZA74_05405	935.922	-0.403755	-0.329625	1.18108	0.973209	0.837046	2.23079e-06
chromosome	KZA74_05415	1,148,741..1,149,286	546	<=	gamma carbonic anhydrase family protein	gca	ACX60_RS05390	ABUW_1126	A1S_2436	KZA74_05415	270.898	0.212067	0.272096	0.712396	0.973209	0.837046	0.000677543
chromosome	dacC	1,149,386..1,150,534	1149	<=	dacC, D-alanyl-D-alanine carboxypeptidase PBP5/6	dacC	ACX60_RS05395	ABUW_1127	A1S_2435	KZA74_05420	1229.31	-0.442663	-0.380832	2.61017	0.973209	0.837046	2.22043e-14
chromosome	KZA74_05440	1,152,587..1,153,417	831	=>	peptidoglycan DD-metalloendopeptidase familyprotein	nlpD	ACX60_RS05415	ABUW_1131	A1S_2432	KZA74_05440	784.691	-0.44818	-0.502872	-0.0798149	0.973209	0.837046	0.87083
chromosome	KZA74_05455	1,157,291..1,159,480	2190	=>	MFS transporter	ampG	ACX60_RS05430	ABUW_1134	A1S_2427	KZA74_05455	1060.73	-0.310618	-0.269153	-0.133291	0.973209	0.837046	0.625203
chromosome	gloA	1,159,483..1,159,884	402	=>	gloA, lactoylglutathione lyase	GLO1, gloA	ACX60_RS05435	ABUW_1135	A1S_2426	KZA74_05460	938.766	0.358834	-0.753216	-0.0951926	0.973209	0.837046	0.903266
chromosome	KZA74_05515	1,173,592..1,174,458	867	=>	PaaX family transcriptional regulator	paaX	ACX60_RS05490	NA	A1S_2412	KZA74_05515	151.025	0.651112	0.546928	-1.05186	0.973209	0.837046	0.0279029
chromosome	KZA74_05580	1,187,539..1,187,652	114	=>	deoxyribonuclease	NA	NA	NA	NA	KZA74_05580	21.2328	0.831079	0.792026	0.755888	0.973209	0.837046	0.215418
chromosome	KZA74_05600	1,191,800..1,192,363	564	=>	TetR/AcrR family transcriptional regulator	NA	ACX60_RS05570	ABUW_1163	A1S_2396	KZA74_05600	132.049	0.674216	0.686012	-5.87544	0.973209	0.837046	6.19362e-15
chromosome	basH	1,219,282..1,220,016	735	=>	basH, acinetobactin biosynthesis thioesterase BasH	basH, lgrE	ACX60_RS05670	ABUW_1186	A1S_2374	KZA74_05700	127.982	0.351468	0.672261	-0.148806	0.973209	0.837046	0.764847
chromosome	hemE	1,223,744..1,224,817	1074	=>	hemE, uroporphyrinogen decarboxylase	hemE, UROD	ACX60_RS05690	ABUW_1190	A1S_2370	KZA74_05720	779.252	-0.213489	-0.439311	0.310011	0.973209	0.837046	0.212529
chromosome	KZA74_05740	1,228,260..1,229,411	1152	<=	class C extended-spectrum beta-lactamase ADC-26	NA	ACX60_RS05710	ABUW_1194	A1S_2367	KZA74_05740	383.525	0.33761	0.450099	1.31588	0.973209	0.837046	5.65186e-05
chromosome	KZA74_05765	1,235,261..1,235,956	696	<=	Smr/MutS family protein	NA	ACX60_RS05735	ABUW_1199	A1S_2361	KZA74_05765	463.277	-0.284547	-0.470001	1.07717	0.973209	0.837046	0.000327913
chromosome	trpD	1,236,782..1,237,831	1050	<=	trpD, anthranilate phosphoribosyltransferase	trpD	ACX60_RS05745	ABUW_1201	A1S_2359	KZA74_05775	1172.21	-0.366711	-0.53989	1.05326	0.973209	0.837046	0.000590318
chromosome	KZA74_05790	1,243,795..1,244,379	585	<=	aminodeoxychorismate/anthranilate synthasecomponent II	trpG	ACX60_RS05760	ABUW_1204	A1S_2355	KZA74_05790	1146.57	-0.293307	-0.529114	2.10899	0.973209	0.837046	3.67904e-05
chromosome	KZA74_05825	1,253,355..1,253,555	201	=>	KZA74_05825	NA	ACX60_RS05795	ABUW_1211	A1S_3800	KZA74_05825	49.6157	0.637015	0.695878	0.198914	0.973209	0.837046	0.655191
chromosome	KZA74_05830	1,253,565..1,254,008	444	<=	DUF2726 domain-containing protein	NA	ACX60_RS05800	ABUW_1212	A1S_2347	KZA74_05830	146.271	0.739658	0.65268	-2.91627	0.973209	0.837046	5.49305e-06
chromosome	KZA74_05870	1,258,904..1,261,174	2271	<=	NADP-dependent malic enzyme	E1.1.1.40, maeB	ACX60_RS05840	ABUW_1220	A1S_2338	KZA74_05870	5292.91	-0.642137	-0.787748	1.32065	0.973209	0.837046	0.059693
chromosome	metF	1,265,136..1,265,972	837	<=	metF, methylenetetrahydrofolate reductase [NAD(P)H]	metF, MTHFR	ACX60_RS05855	ABUW_1223	A1S_2335	KZA74_05885	752.014	-0.28545	-0.630241	1.50574	0.973209	0.837046	2.42274e-05
chromosome	KZA74_05905	1,268,710..1,271,175	2466	<=	acyl-CoA dehydrogenase	fadE	ACX60_RS05875	ABUW_1227	A1S_2330	KZA74_05905	1384.65	-0.322804	-0.563921	-1.17861	0.973209	0.837046	0.00350886
chromosome	sthA	1,272,669..1,274,081	1413	=>	sthA, Si-specific NAD(P)(+) transhydrogenase	sthA, udhA	ACX60_RS05885	ABUW_1229	A1S_2328	KZA74_05915	2713.25	-0.272483	-0.587632	1.29168	0.973209	0.837046	0.0170667
chromosome	KZA74_05960	1,283,166..1,283,882	717	=>	AzlC family ABC transporter permease	azlC	ACX60_RS05935	ABUW_1239	A1S_2319	KZA74_05960	142.146	0.637423	0.594712	-1.69701	0.973209	0.837046	0.000594201
chromosome	KZA74_05965	1,283,884..1,284,201	318	=>	AzlD domain-containing protein	azlD	ACX60_RS05940	ABUW_1240	NA	KZA74_05965	47.8525	0.746494	0.693065	-2.87779	0.973209	0.837046	3.09746e-05
chromosome	KZA74_05970	1,284,242..1,284,694	453	<=	DUF962 domain-containing protein	NA	ACX60_RS05945	ABUW_1241	A1S_2318	KZA74_05970	267.589	0.266203	0.406333	1.38197	0.973209	0.837046	3.37236e-06
chromosome	KZA74_05975	1,285,251..1,285,868	618	<=	septal ring lytic transglycosylase RlpA familyprotein	rlpA	ACX60_RS05950	ABUW_1242	A1S_2317	KZA74_05975	3232.63	-0.985826	-0.905631	1.74409	0.973209	0.837046	0.0293919
chromosome	KZA74_06015	1,291,933..1,292,568	636	<=	KZA74_06015	NA	ACX60_RS05990	ABUW_1330	A1S_3799	KZA74_06015	135.631	0.641431	0.911444	-2.50409	0.973209	0.837046	4.0469e-06
chromosome	KZA74_06085	1,307,386..1,307,649	264	<=	YfhL family 4Fe-4S dicluster ferredoxin	yfhL	ACX60_RS06055	ABUW_1344	A1S_2297	KZA74_06085	130.056	-0.365027	-0.487814	0.660195	0.973209	0.837046	0.123081
chromosome	mrcB	1,321,066..1,323,462	2397	<=	mrcB, penicillin-binding protein 1B	mrcB	ACX60_RS06125	ABUW_1358	A1S_2284	KZA74_06155	3670.66	-0.42331	-0.579765	1.02874	0.973209	0.837046	0.0547897
chromosome	pheA	1,330,380..1,331,489	1110	=>	pheA, prephenate dehydratase	pheA	ACX60_RS06160	ABUW_1365	A1S_2277	KZA74_06190	1136.55	-0.194297	-0.283512	1.13955	0.973209	0.837046	3.11174e-05
chromosome	KZA74_06195	1,331,598..1,333,844	2247	=>	bifunctional prephenatedehydrogenase/3-phosphoshikimate 1-carboxyvinyltransferase	tyrC	ACX60_RS06165	ABUW_1366	A1S_2276	KZA74_06195	2878.89	-0.257806	-0.68029	0.967831	0.973209	0.837046	0.0347587
chromosome	KZA74_06255	1,344,722..1,345,507	786	<=	thiazole synthase	thiG	ACX60_RS06225	ABUW_1372	A1S_2265	KZA74_06255	703.113	-0.339363	-0.481149	0.423501	0.973209	0.837046	0.129481
chromosome	thiS	1,345,521..1,345,718	198	<=	thiS, sulfur carrier protein ThiS	thiS	ACX60_RS06230	ABUW_1373	A1S_2264	KZA74_06260	158.987	-0.457839	-0.406019	-0.0343091	0.973209	0.837046	0.910743
chromosome	KZA74_06265	1,345,732..1,346,097	366	<=	DUF423 domain-containing protein	NA	ACX60_RS06235	ABUW_1374	A1S_2263	KZA74_06265	333.19	-0.318089	-0.537515	0.68836	0.973209	0.837046	0.0163244
chromosome	KZA74_06275	1,347,209..1,347,454	246	<=	tsuA, sulfurtransferase TusA family protein	tusA, sirA	ACX60_RS06245	ABUW_1376	NA	KZA74_06275	222.556	0.476093	0.814685	3.70294	0.973209	0.837046	3.12303e-22
chromosome	rhlB	1,348,145..1,349,296	1152	=>	rhlB, ATP-dependent RNA helicase RhlB	rhlB	ACX60_RS06255	ABUW_1378	A1S_2260	KZA74_06285	2916.5	-0.533246	-0.732898	1.75856	0.973209	0.837046	0.00314477
chromosome	KZA74_06300	1,350,528..1,351,601	1074	=>	NAD(P)H-dependent glycerol-3-phosphatedehydrogenase	gpsA	ACX60_RS06270	ABUW_1381	A1S_2257	KZA74_06300	852.983	-0.359571	-0.447729	0.65473	0.973209	0.837046	0.0358396
chromosome	KZA74_06310	1,352,136..1,353,275	1140	=>	general secretion pathway protein GspL	gspL	ACX60_RS06280	ABUW_1442	A1S_2255	KZA74_06310	904.151	-0.339451	-0.448871	0.736554	0.973209	0.837046	0.0154864
chromosome	KZA74_06355	1,362,371..1,362,817	447	<=	GatB/YqeY domain-containing protein	K09117	ACX60_RS06325	ABUW_1451	A1S_2246	KZA74_06355	5322.33	0.63649	-0.928137	2.36341	0.973209	0.837046	0.0051581
chromosome	rpsU	1,362,844..1,363,059	216	<=	rpsU, 30S ribosomal protein S21	RP-S21, MRPS21, rpsU	ACX60_RS06330	ABUW_1452	A1S_2245	KZA74_06360	4568.73	0.492917	-0.923744	2.20732	0.973209	0.837046	0.0135404
chromosome	KZA74_06400	1,369,132..1,369,216	85	=>	tRNA-Leu	NA	NA	NA	NA	KZA74_06400	252.933	0.749944	-0.652665	-2.59969	0.973209	0.837046	3.44864e-05
chromosome	KZA74_06405	1,369,282..1,369,355	74	=>	tRNA-Trp	NA	NA	NA	NA	KZA74_06405	78.9052	0.489606	0.574669	-1.41262	0.973209	0.837046	0.00512723
chromosome	KZA74_06455	1,378,928..1,379,290	363	=>	NirD/YgiW/YdeI family stress tolerance protein	NA	ACX60_RS06425	ABUW_1471	NA	KZA74_06455	351.782	-0.707471	-0.531354	-1.27691	0.973209	0.837046	0.0143276
chromosome	KZA74_06460	1,379,454..1,379,924	471	=>	BLUF domain-containing protein	blsA	ACX60_RS06430	ABUW_1472	A1S_2225	KZA74_06460	127.405	0.31572	0.560339	0.494053	0.973209	0.837046	0.159669
chromosome	KZA74_06465	1,379,921..1,380,247	327	<=	KZA74_06465	NA	ACX60_RS06435	ABUW_1473	NA	KZA74_06465	39.0379	0.531416	0.713899	-1.3438	0.973209	0.837046	0.0275972
chromosome	KZA74_06470	1,380,814..1,381,419	606	<=	LysE family translocator	NA	ACX60_RS06440	ABUW_1474	A1S_2224	KZA74_06470	83.9436	0.311784	0.776919	-3.13294	0.973209	0.837046	5.21228e-08
chromosome	gltS	1,383,973..1,385,208	1236	=>	gltS, sodium/glutamate symporter	gltS	ACX60_RS06455	ABUW_1477	A1S_2221	KZA74_06485	1431.33	-0.889621	-1.08583	-0.338853	0.973209	0.837046	0.63172
chromosome	KZA74_06550	1,397,084..1,397,704	621	<=	NUDIX hydrolase	NA	ACX60_RS06520	NA	A1S_2211	KZA74_06550	149.938	0.348787	0.64494	-0.299287	0.973209	0.837046	0.635296
chromosome	KZA74_06615	1,409,762..1,410,214	453	=>	GNAT family N-acetyltransferase	NA	ACX60_RS06585	ABUW_1522	A1S_2199	KZA74_06615	246.337	-0.691499	-0.56859	-0.63408	0.973209	0.837046	0.237867
chromosome	KZA74_06630	1,412,609..1,413,907	1299	=>	dicarboxylate/amino acid:cation symporter	dctA	ACX60_RS06600	ABUW_1525	A1S_2196	KZA74_06630	1550.55	-0.307594	-0.666006	1.84251	0.973209	0.837046	0.00116313
chromosome	gloB	1,414,703..1,415,434	732	<=	gloB, hydroxyacylglutathione hydrolase	gloB, HAGH	ACX60_RS06610	ABUW_1527	A1S_2194	KZA74_06640	393.302	-0.378702	-0.342185	0.79373	0.973209	0.837046	0.00284
chromosome	purD	1,418,500..1,419,786	1287	<=	purD, phosphoribosylamine--glycine ligase	purD	ACX60_RS06630	ABUW_1531	A1S_2189	KZA74_06660	2934.78	-0.447092	-0.950212	1.01077	0.973209	0.837046	0.109983
chromosome	purH	1,419,912..1,421,486	1575	<=	purH, bifunctionalphosphoribosylaminoimidazolecarboxamide formyltransferase/IMP cyclohydrolase	purH	ACX60_RS06635	ABUW_1532	A1S_2187	KZA74_06665	4527.54	-0.403613	-0.789018	1.88413	0.973209	0.837046	0.00283139
chromosome	fis	1,421,576..1,421,845	270	<=	fis, DNA-binding transcriptional regulator Fis	fis	ACX60_RS06640	ABUW_1533	A1S_2186	KZA74_06670	1591.32	-0.495474	-0.734049	1.87848	0.973209	0.837046	0.005057
chromosome	KZA74_06700	1,428,104..1,429,654	1551	=>	circularly permuted type 2 ATP-grasp protein	NA	ACX60_RS06670	ABUW_1540	A1S_2180	KZA74_06700	1161.32	-0.520797	-0.508331	-0.354351	0.973209	0.837046	0.434567
chromosome	rplI	1,434,607..1,435,053	447	<=	rplI, 50S ribosomal protein L9	RP-L9, MRPL9, rplI	ACX60_RS06700	ABUW_1546	A1S_2173	KZA74_06730	8903.96	-0.573455	-2.04088	3.03152	0.973209	0.837046	0.00125868
chromosome	rpsR	1,435,062..1,435,289	228	<=	rpsR, 30S ribosomal protein S18	RP-S18, MRPS18, rpsR	ACX60_RS06705	ABUW_1547	A1S_2172	KZA74_06735	2998.21	-1.07617	-2.31339	2.38156	0.973209	0.837046	0.00855792
chromosome	rpsF	1,435,301..1,435,684	384	<=	rpsF, 30S ribosomal protein S6	RP-S6, MRPS6, rpsF	ACX60_RS06710	ABUW_1548	A1S_2171	KZA74_06740	11847.3	-0.958825	-1.86282	3.47284	0.973209	0.837046	0.000403383
chromosome	cyoB	1,437,712..1,439,703	1992	<=	cyoB, cytochrome o ubiquinol oxidase subunit I	cyoB	ACX60_RS06730	ABUW_1552	A1S_2167	KZA74_06760	16880.7	-0.481608	-1.39491	1.56658	0.973209	0.837046	0.0768963
chromosome	cyoA	1,439,707..1,440,759	1053	<=	cyoA, ubiquinol oxidase subunit II	cyoA	ACX60_RS06735	ABUW_1553	A1S_2166	KZA74_06765	10711.8	-0.744527	-1.34252	1.68862	0.973209	0.837046	0.0675752
chromosome	KZA74_06815	1,453,516..1,454,019	504	<=	KZA74_06815	NA	ACX60_RS06785	ABUW_1563	A1S_3791	KZA74_06815	770.714	-0.446053	0.874071	0.435531	0.973209	0.837046	0.281236
chromosome	KZA74_06825	1,454,875..1,455,777	903	<=	LysR family transcriptional regulator	NA	ACX60_RS06795	ABUW_1565	A1S_2156	KZA74_06825	161.804	0.664306	0.776891	-0.540958	0.973209	0.837046	0.322789
chromosome	prfA	1,456,927..1,458,015	1089	=>	prfA, peptide chain release factor 1	prfA, MTRF1, MRF1	ACX60_RS06805	ABUW_1567	A1S_2154	KZA74_06835	889.291	-0.277677	-0.347891	0.396286	0.973209	0.837046	0.154091
chromosome	folB	1,466,769..1,467,149	381	=>	folB, dihydroneopterin aldolase	folB	ACX60_RS06850	ABUW_1578	A1S_2144	KZA74_06880	254.796	-0.277368	-0.448859	0.668255	0.973209	0.837046	0.0841652
chromosome	KZA74_06940	1,482,980..1,487,485	4506	=>	translocation/assembly module TamBdomain-containing protein	tamB	ACX60_RS06910	ABUW_1591	A1S_2130	KZA74_06940	4843.86	-0.731238	-0.576505	0.506422	0.973209	0.837046	0.389925
chromosome	KZA74_06995	1,497,728..1,498,432	705	=>	rRNA pseudouridine synthase	rsuA	ACX60_RS06965	ABUW_1602	A1S_2120	KZA74_06995	394.965	-0.394749	-0.356374	0.650724	0.973209	0.837046	0.0330684
chromosome	mutL	1,500,880..1,502,832	1953	=>	mutL, DNA mismatch repair endonuclease MutL	mutL	ACX60_RS06990	ABUW_1607	A1S_2114	KZA74_07020	1146.71	-0.347597	-0.277582	0.463743	0.973209	0.837046	0.0348017
chromosome	KZA74_07035	1,504,515..1,505,372	858	=>	DMT family transporter	NA	ACX60_RS07005	ABUW_1610	A1S_2112	KZA74_07035	150.481	0.569223	0.609532	-1.06544	0.973209	0.837046	0.0140738
chromosome	KZA74_07105	1,520,152..1,521,864	1713	=>	AAA family ATPase	NA	ACX60_RS07075	ABUW_1625	A1S_2097	KZA74_07105	1205.78	-0.338727	-0.406208	0.912867	0.973209	0.837046	0.00264092
chromosome	pepN	1,525,135..1,527,741	2607	=>	pepN, aminopeptidase N	pepN	ACX60_RS07100	ABUW_1630	A1S_2092	KZA74_07130	5966.9	-0.524993	-0.748947	1.00839	0.973209	0.837046	0.164723
chromosome	KZA74_07135	1,528,296..1,528,823	528	=>	spore coat U domain-containing protein	NA	ACX60_RS07105	ABUW_1631	A1S_2091	KZA74_07135	180.574	-0.653643	-0.416986	-0.404597	0.973209	0.837046	0.351315
chromosome	KZA74_07185	1,538,490..1,539,044	555	=>	TetR/AcrR family transcriptional regulator	NA	ACX60_RS07155	ABUW_1645	A1S_2082	KZA74_07185	81.4232	0.353969	0.636366	-2.33288	0.973209	0.837046	1.38439e-07
chromosome	KZA74_07210	1,544,686..1,544,967	282	=>	KZA74_07210	NA	ACX60_RS07180	ABUW_1652	NA	KZA74_07210	51.2857	0.386201	0.759656	0.378988	0.973209	0.837046	0.389627
chromosome	KZA74_07240	1,550,566..1,550,991	426	=>	DNA breaking-rejoining protein	pliG	ACX60_RS07210	ABUW_1659	A1S_2074	KZA74_07240	37.3692	0.403131	0.799607	-1.6499	0.973209	0.837046	0.0206612
chromosome	KZA74_07260	1,554,045..1,554,218	174	=>	KZA74_07260		ACX60_RS07230	NA	NA	KZA74_07260	20.6256	0.747693	1.30534	-1.82699	0.973209	0.837046	0.0255441
chromosome	KZA74_07320	1,566,065..1,567,456	1392	=>	3-oxoacyl-ACP reductase	fabG	ACX60_RS07285	ABUW_1675	A1S_2061	KZA74_07320	2709.18	0.312124	-0.812524	1.56556	0.973209	0.837046	0.00919094
chromosome	KZA74_07330	1,568,457..1,569,716	1260	=>	beta-lactamase family protein	NA	ACX60_RS07295	ABUW_1677	A1S_2059	KZA74_07330	786.674	-0.238986	-0.631353	0.297673	0.973209	0.837046	0.403372
chromosome	KZA74_07360	1,577,274..1,578,431	1158	<=	iron-containing alcohol dehydrogenase	E1.1.1.1, adh	ACX60_RS07325	ABUW_1684	A1S_2053	KZA74_07360	479.21	-0.290745	-0.342339	0.0741823	0.973209	0.837046	0.815551
chromosome	KZA74_07380	1,581,764..1,582,894	1131	=>	YdcF family protein	ydcF	ACX60_RS07345	ABUW_1688	A1S_2048	KZA74_07380	480.481	-0.105767	-0.265348	0.155916	0.973209	0.837046	0.453265
chromosome	KZA74_07445	1,593,955..1,595,076	1122	<=	ATP-binding protein	NA	ACX60_RS07410	NA	A1S_2039	KZA74_07445	220.858	-0.795418	-0.537442	-4.04846	0.973209	0.837046	1.13683e-14
chromosome	KZA74_07550	1,607,491..1,607,709	219	=>	KZA74_07550	NA	ACX60_RS07515	NA	NA	KZA74_07550	69.6265	0.491846	0.743242	-0.278704	0.973209	0.837046	0.515233
chromosome	KZA74_07595	1,614,507..1,614,743	237	=>	KZA74_07595	NA	ACX60_RS07560	ABUW_0778|ABUW_1296	NA	KZA74_07595	47.042	-0.313958	-0.547533	-1.5595	0.973209	0.837046	0.000192007
chromosome	KZA74_07755	1,638,709..1,639,347	639	<=	SRAP, SOS response-associated peptidase familyprotein	NA	ACX60_RS07710	NA	A1S_2014	KZA74_07755	202.991	0.526078	0.586301	0.774532	0.973209	0.837046	0.125887
chromosome	accB	1,643,924..1,644,343	420	<=	accB, acetyl-CoA carboxylase biotin carboxyl carrierprotein	accB, bccP	ACX60_RS07735	ABUW_1697	A1S_2010	KZA74_07780	544.309	-0.293271	-0.480263	1.53926	0.973209	0.837046	0.000342074
chromosome	moaCB	1,661,119..1,662,042	924	=>	moaCB, bifunctional molybdenum cofactor biosynthesisprotein MoaC/MoaB	moaCB, NA	ACX60_RS07805	ABUW_1712	A1S_1996	KZA74_07855	673.477	-0.427091	-0.383893	-0.248423	0.973209	0.837046	0.380396
chromosome	KZA74_07865	1,663,486..1,663,968	483	=>	helix-turn-helix transcriptional regulator	NA	ACX60_RS07815	ABUW_1714	A1S_1994	KZA74_07865	598.018	-0.551869	-0.619711	0.0250409	0.973209	0.837046	0.967511
chromosome	KZA74_07885	1,666,690..1,666,974	285	<=	DsrH like protein	NA	ACX60_RS07835	ABUW_1718	A1S_1990	KZA74_07885	57.086	0.264365	0.457521	1.16571	0.973209	0.837046	0.0057721
chromosome	KZA74_07890	1,666,992..1,667,342	351	<=	KZA74_07890	NA	ACX60_RS07840	ABUW_1719	A1S_1989	KZA74_07890	153.128	-0.441731	-0.390946	-0.213399	0.973209	0.837046	0.5541
chromosome	KZA74_07915	1,670,949..1,671,410	462	<=	KZA74_07915	NA	ACX60_RS07865	ABUW_1724	NA	KZA74_07915	108.816	0.336137	0.534322	0.980236	0.973209	0.837046	0.0186123
chromosome	KZA74_07930	1,673,915..1,674,559	645	<=	KZA74_07930	NA	ACX60_RS07880	ABUW_1727	A1S_1983	KZA74_07930	199.11	0.128679	0.266115	-0.199887	0.973209	0.837046	0.364772
chromosome	ispF	1,674,663..1,675,145	483	=>	ispF, 2-C-methyl-D-erythritol 2,4-cyclodiphosphatesynthase	ispF	ACX60_RS07885	ABUW_1728	A1S_1982	KZA74_07935	232.407	-0.225136	-0.295036	0.23904	0.973209	0.837046	0.417222
chromosome	KZA74_07940	1,675,142..1,675,666	525	<=	protein tyrosine phosphatase family protein	NA	ACX60_RS07890	ABUW_1729	A1S_1981	KZA74_07940	139.741	0.287696	0.338471	1.23895	0.973209	0.837046	1.90713e-06
chromosome	glnG	1,677,823..1,679,316	1494	<=	glnG, nitrogen regulation protein NR(I)	glnG, ntrC	ACX60_RS07905	ABUW_1732	A1S_1978	KZA74_07955	1971.66	-0.731393	-1.07712	1.32234	0.973209	0.837046	0.0254453
chromosome	KZA74_07960	1,679,303..1,680,412	1110	<=	PAS domain-containing protein	glnL, ntrB	ACX60_RS07910	ABUW_1733	A1S_1977	KZA74_07960	790.937	-0.251529	-0.663498	1.85533	0.973209	0.837046	1.66441e-05
chromosome	KZA74_07990	1,684,275..1,685,099	825	=>	phosphatidate cytidylyltransferase	E2.7.7.41, CDS1, CDS2, cdsA	ACX60_RS07940	ABUW_1739	A1S_1972	KZA74_07990	1109.12	-0.243784	-0.376758	1.16035	0.973209	0.837046	0.000206592
chromosome	ispC	1,685,100..1,686,296	1197	=>	ispC, 1-deoxy-D-xylulose-5-phosphate reductoisomerase	dxr, ispC	ACX60_RS07945	ABUW_1740	A1S_1971	KZA74_07995	1215.6	-0.384196	-0.621129	1.31549	0.973209	0.837046	0.00263262
chromosome	rseP	1,686,298..1,687,653	1356	=>	rseP, RIP metalloprotease RseP	rseP	ACX60_RS07950	ABUW_1741	A1S_1970	KZA74_08000	1314.26	-0.529454	-0.56827	0.803762	0.973209	0.837046	0.0726079
chromosome	bamA	1,687,634..1,690,201	2568	=>	bamA, outer membrane protein assembly factor BamA	SAM50, TOB55, bamA	ACX60_RS07955	ABUW_1742	A1S_1969	KZA74_08005	4529.39	-0.817169	-0.851733	1.2105	0.973209	0.837046	0.0975342
chromosome	fabZ	1,691,828..1,692,313	486	=>	fabZ, 3-hydroxyacyl-ACP dehydratase FabZ	fabZ	ACX60_RS07970	ABUW_1745	A1S_1966	KZA74_08020	853.607	-0.604991	-0.750155	1.34865	0.973209	0.837046	0.0551547
chromosome	KZA74_08055	1,696,619..1,697,305	687	<=	HAD-IA family hydrolase	yrfG	ACX60_RS07995	ABUW_1750	A1S_1960	KZA74_08055	219.298	-0.492862	-0.296897	0.196008	0.973209	0.837046	0.537624
chromosome	KZA74_08110	1,707,419..1,708,048	630	<=	SRAP, SOS response-associated peptidase	SRAP	ACX60_RS08050	ABUW_1761	A1S_1952	KZA74_08110	111.448	0.400871	0.670943	-0.51983	0.973209	0.837046	0.226542
chromosome	KZA74_08115	1,708,403..1,709,845	1443	=>	PQQ-dependent sugar dehydrogenase	gcd, gdhB	ACX60_RS08055	ABUW_1762|ABUW_1907	A1S_1951	KZA74_08115	1407.57	-0.666538	-0.755307	0.131836	0.973209	0.837046	0.836472
chromosome	KZA74_08135	1,713,576..1,714,040	465	<=	MarR family transcriptional regulator	NA	ACX60_RS08075	ABUW_1768	A1S_1948	KZA74_08135	165.082	0.239571	0.556802	2.2272	0.973209	0.837046	4.35433e-10
chromosome	KZA74_08140	1,714,708..1,716,426	1719	<=	fructose-specific PTS transporter subunit EIIC	PTS-Fru-EIIC, fruA	ACX60_RS08080	ABUW_1770	A1S_1947	KZA74_08140	627.343	-0.370265	-0.31051	0.470875	0.973209	0.837046	0.0561084
chromosome	KZA74_08185	1,725,562..1,726,464	903	<=	LysR family transcriptional regulator	NA	ACX60_RS08125	ABUW_1779	A1S_1939	KZA74_08185	431.681	-0.247728	-0.511798	0.79841	0.973209	0.837046	0.00954215
chromosome	KZA74_08190	1,726,708..1,727,031	324	=>	KZA74_08190	NA	ACX60_RS08130	ABUW_1780	A1S_1938	KZA74_08190	63.3778	0.221706	0.479795	0.959854	0.973209	0.837046	0.011819
chromosome	KZA74_08215	1,730,186..1,730,419	234	<=	KZA74_08215	NA	ACX60_RS08155	ABUW_1786	A1S_1933	KZA74_08215	3272.17	-0.733532	-0.797144	0.731182	0.973209	0.837046	0.37676
chromosome	KZA74_08245	1,734,389..1,734,913	525	=>	GNAT family N-acetyltransferase	NA	ACX60_RS08185	NA	A1S_1927	KZA74_08245	64.9182	0.53894	0.383207	-0.461775	0.973209	0.837046	0.241208
chromosome	KZA74_08250	1,734,926..1,735,225	300	<=	cyd operon YbgE family protein	NA	ACX60_RS08190	ABUW_1792	A1S_1926	KZA74_08250	1989.67	-1.07757	-1.21909	0.60584	0.973209	0.837046	0.404176
chromosome	cydB	1,735,341..1,736,486	1146	<=	cydB, cytochrome d ubiquinol oxidase subunit II	cydB	ACX60_RS08200	ABUW_1794	A1S_1925	KZA74_08260	7157.55	-1.00527	-1.28354	1.00188	0.973209	0.837046	0.21017
chromosome	KZA74_08265	1,736,483..1,738,069	1587	<=	cydA, cytochrome ubiquinol oxidase subunit I	cydA	ACX60_RS08205	ABUW_1795	A1S_1924	KZA74_08265	9608.29	-1.09757	-1.21245	1.19144	0.973209	0.837046	0.130898
chromosome	KZA74_08280	1,739,280..1,739,588	309	<=	Rieske (2Fe-2S) protein	NA	ACX60_RS08220	ABUW_1798	NA	KZA74_08280	354.462	-0.386815	-0.580954	1.42265	0.973209	0.837046	0.0154759
chromosome	KZA74_08295	1,743,198..1,746,137	2940	=>	insulinase family protein	PITRM1, PreP, CYM1	ACX60_RS08235	ABUW_1802	A1S_1920	KZA74_08295	4241.55	-0.381933	-0.700108	0.954982	0.973209	0.837046	0.130012
chromosome	argC	1,754,202..1,755,257	1056	=>	argC, N-acetyl-gamma-glutamyl-phosphate reductase	argC	ACX60_RS08275	ABUW_1811	A1S_1913	KZA74_08335	897.515	-0.292549	-0.6644	0.907194	0.973209	0.837046	0.025494
chromosome	KZA74_08340	1,755,333..1,756,091	759	=>	KZA74_08340	NA	ACX60_RS08280	ABUW_1812	A1S_1912	KZA74_08340	859.689	-0.583813	-0.670116	0.476309	0.973209	0.837046	0.356367
chromosome	clpS	1,756,101..1,756,514	414	=>	clpS, ATP-dependent Clp protease adapter ClpS	clpS	ACX60_RS08285	ABUW_1813	A1S_1911	KZA74_08345	440.632	-0.436891	-0.5219	0.967671	0.973209	0.837046	0.045542
chromosome	clpA	1,756,524..1,758,800	2277	=>	clpA, ATP-dependent Clp protease ATP-binding subunitClpA	clpA	ACX60_RS08290	ABUW_1814	A1S_1910	KZA74_08350	8293.7	-0.529126	-1.00627	0.0335835	0.973209	0.837046	0.971382
chromosome	KZA74_08360	1,759,593..1,760,648	1056	=>	3-deoxy-7-phosphoheptulonate synthase	E2.5.1.54, aroF, aroG, aroH	ACX60_RS08300	ABUW_1816	A1S_1908	KZA74_08360	1339.43	-0.342913	-0.707037	1.25146	0.973209	0.837046	0.0145714
chromosome	KZA74_08385	1,764,849..1,765,565	717	=>	SGNH/GDSL hydrolase family protein	NA	ACX60_RS08325	ABUW_1821	A1S_1903	KZA74_08385	239.896	-0.362152	-0.335491	-0.569401	0.973209	0.837046	0.0887374
chromosome	ftsB	1,773,789..1,774,178	390	=>	ftsB, cell division protein FtsB	ftsB	ACX60_RS08365	ABUW_1829	A1S_1896	KZA74_08425	777.805	-0.493546	-0.606342	0.545541	0.973209	0.837046	0.321702
chromosome	KZA74_08535	1,795,539..1,796,660	1122	=>	phosphotransferase family protein	NA	ACX60_RS08475	ABUW_1851	A1S_1872	KZA74_08535	599.241	-0.170507	-0.264832	-0.747753	0.973209	0.837046	0.000582543
chromosome	KZA74_08720	1,837,532..1,838,599	1068	=>	saccharopine dehydrogenase NADP-bindingdomain-containing protein	NA	ACX60_RS08660	ABUW_1888	A1S_1831	KZA74_08720	434.796	-0.444153	-0.377746	-1.87896	0.973209	0.837046	2.34738e-07
chromosome	KZA74_08765	1,845,622..1,846,557	936	<=	LysR family transcriptional regulator	pcpR_2	ACX60_RS08705	NA	A1S_1822	KZA74_08765	170.98	0.532473	0.478868	-0.204288	0.973209	0.837046	0.69911
chromosome	KZA74_08810	1,856,573..1,857,151	579	=>	TetR/AcrR family transcriptional regulator	NA	ACX60_RS08750	ABUW_1912	A1S_1813	KZA74_08810	75.4504	0.368331	0.684829	-3.95493	0.973209	0.837046	6.32499e-09
chromosome	KZA74_09000	1,894,064..1,895,557	1494	=>	nicotinate phosphoribosyltransferase	NAMPT	ACX60_RS08945	ABUW_1943	A1S_1780	KZA74_09000	655.638	-0.22382	-0.394233	-0.610899	0.973209	0.837046	0.0319871
chromosome	KZA74_09105	1,917,174..1,918,256	1083	=>	ImmA/IrrE family metallo-endopeptidase	NA	ACX60_RS09050	NA	A1S_1762	KZA74_09105	1719.16	0.608017	-0.74046	0.965008	0.973209	0.837046	0.210046
chromosome	KZA74_09110	1,918,298..1,918,813	516	=>	KZA74_09110	NA	ACX60_RS09055	NA	A1S_3726	KZA74_09110	35.7543	0.345001	0.898808	-4.55744	0.973209	0.837046	7.98947e-09
chromosome	KZA74_09135	1,922,038..1,922,325	288	<=	PAAR domain-containing protein	NA	ACX60_RS09080	NA	NA	KZA74_09135	105.979	0.341364	0.365833	-0.0255324	0.973209	0.837046	0.945249
chromosome	KZA74_09165	1,927,543..1,927,956	414	=>	KZA74_09165	NA	ACX60_RS09110	ABUW_1971	NA	KZA74_09165	140.683	0.429603	0.36169	-0.986857	0.973209	0.837046	0.00271484
chromosome	adeR	1,929,099..1,929,842	744	<=	adeR, efflux system response regulator transcriptionfactor AdeR	adeR	ACX60_RS09120	ABUW_1973	A1S_1753	KZA74_09175	213.068	0.225315	0.322784	-0.535762	0.973209	0.837046	0.110851
chromosome	KZA74_09215	1,940,355..1,940,612	258	<=	KZA74_09215	KZA74_09215	NA	NA	NA	KZA74_09215	57.8439	0.60685	0.570901	-0.144289	0.973209	0.837046	0.777644
chromosome	KZA74_09225	1,941,843..1,942,184	342	<=	DUF2523 domain-containing protein	KZA74_09225	NA	NA	NA	KZA74_09225	43.2565	0.649033	0.940376	-3.44501	0.973209	0.837046	9.90592e-06
chromosome	KZA74_09235	1,943,941..1,944,192	252	<=	KZA74_09235	KZA74_09235	NA	NA	NA	KZA74_09235	331.133	-0.350914	-0.671447	-0.0870425	0.973209	0.837046	0.885285
chromosome	KZA74_09285	1,954,210..1,955,163	954	=>	DUF4882 domain-containing protein	KZA74_09285	NA	NA	NA	KZA74_09285	183.996	0.247225	0.490743	-1.50976	0.973209	0.837046	0.000544571
chromosome	pqqE	1,966,572..1,967,726	1155	<=	pqqE, pyrroloquinoline quinone biosynthesis proteinPqqE	pqqE	NA	NA	NA	KZA74_09335	566.045	-0.413187	-0.261854	0.0649604	0.973209	0.837046	0.826855
chromosome	KZA74_09370	1,974,286..1,974,687	402	<=	transcriptional repressor	fur?	NA	NA	NA	KZA74_09370	51.0506	0.524792	0.988246	-0.512059	0.973209	0.837046	0.204508
chromosome	KZA74_09480	1,996,330..1,996,730	401	=>	DoxX family membrane protein	NA	ACX60_RS09215	NA	A1S_1735	KZA74_09480	71.5436	0.265292	0.69878	-2.51353	0.973209	0.837046	5.47557e-07
chromosome	KZA74_09485	1,996,933..1,997,760	828	<=	RsiV family protein	rsiV	ACX60_RS09220	NA	A1S_1734	KZA74_09485	226.611	0.303875	0.532311	0.406312	0.973209	0.837046	0.269705
chromosome	KZA74_09490	1,997,958..1,998,347	390	=>	KZA74_09490	NA	ACX60_RS09225	NA	NA	KZA74_09490	47.1408	0.33511	0.720373	0.365337	0.973209	0.837046	0.488691
chromosome	KZA74_09650	2,031,931..2,032,989	1059	<=	2,3-butanediol dehydrogenase	BDH, butB	ACX60_RS09385	ABUW_2126	A1S_1705	KZA74_09650	1159.43	-0.704629	-0.811918	-2.6476	0.973209	0.837046	9.47938e-07
chromosome	KZA74_09690	2,041,472..2,042,224	753	<=	iron-containing redox enzyme family protein	NA	ACX60_RS09425	ABUW_2134	A1S_1696	KZA74_09690	715.638	0.31615	-0.457628	0.0676277	0.973209	0.837046	0.894607
chromosome	aroC	2,043,871..2,044,962	1092	<=	aroC, chorismate synthase	aroC	ACX60_RS09435	ABUW_2136	A1S_1694	KZA74_09700	1035.34	-0.17517	-0.464952	0.623987	0.973209	0.837046	0.04669
chromosome	prmB	2,044,975..2,045,979	1005	<=	prmB, 50S ribosomal protein L3 N(5)-glutamine methyltransferase	prmB	ACX60_RS09440	ABUW_2137	A1S_1693	KZA74_09705	641.764	-0.504454	-0.696033	1.29312	0.973209	0.837046	2.98038e-05
chromosome	KZA74_09710	ND	ND	ND	trpB, tryptophan synthase subunit beta	trpB	ACX60_RS09445	NA	A1S_1692	KZA74_09710	648.51	-0.166066	-0.425565	-0.0821661	0.973209	0.837046	0.796086
chromosome	KZA74_09715	2,047,458..2,048,645	1188	<=	VWA domain-containing protein	K09989	ACX60_RS09450	ABUW_2139	A1S_1691	KZA74_09715	1020.78	-0.491575	-0.638003	0.560231	0.973209	0.837046	0.119002
chromosome	recR	2,053,575..2,054,171	597	<=	recR, recombination mediator RecR	recR	ACX60_RS09490	ABUW_2147	A1S_1685	KZA74_09755	758.528	-0.351987	-0.842433	0.329231	0.973209	0.837046	0.456355
chromosome	KZA74_09765	2,054,776..2,055,012	237	<=	KZA74_09765	NA	ACX60_RS09500	ABUW_2149	A1S_3714	KZA74_09765	58.9687	0.303075	0.667662	0.69557	0.973209	0.837046	0.212437
chromosome	KZA74_09770	2,055,190..2,056,377	1188	<=	O-succinylhomoserine sulfhydrylase	metZ	ACX60_RS09505	ABUW_2150	A1S_1683	KZA74_09770	1110.28	-0.516178	-0.504736	0.661118	0.973209	0.837046	0.0584314
chromosome	KZA74_09780	2,057,677..2,058,444	768	<=	methyltransferase domain-containing protein	NA	ACX60_RS09515	ABUW_2152	A1S_1681	KZA74_09780	125.255	0.78476	0.80376	-0.9498	0.973209	0.837046	0.164809
chromosome	KZA74_09805	2,060,917..2,061,186	270	=>	YARHG domain-containing protein	NA	ACX60_RS09540	ABUW_2158	A1S_1679	KZA74_09805	631.627	-1.07835	-0.775171	1.10787	0.973209	0.837046	0.119294
chromosome	KZA74_09870	2,074,586..2,074,885	300	=>	KZA74_09870	NA	ACX60_RS09605	ABUW_2166	NA	KZA74_09870	51.166	0.575596	0.908214	-0.224698	0.973209	0.837046	0.769518
chromosome	KZA74_10000	2,103,738..2,105,111	1374	=>	AarF/ABC1/UbiB kinase family protein	NA	ACX60_RS09735	ABUW_2192	A1S_1644	KZA74_10000	1727.02	-0.625834	-0.635822	1.28742	0.973209	0.837046	0.00502701
chromosome	KZA74_10010	2,106,646..2,107,851	1206	=>	acyl-CoA dehydrogenase family protein	ACADM, acd	ACX60_RS09745	ABUW_2194	A1S_1642	KZA74_10010	512.222	-0.717252	-0.505843	-0.596247	0.973209	0.837046	0.235236
chromosome	KZA74_10025	2,110,366..2,112,231	1866	<=	SurA N-terminal domain-containing protein	NA	ACX60_RS09760	ABUW_2197	A1S_1638	KZA74_10025	2999.62	-0.647169	-0.876849	1.33273	0.973209	0.837046	0.0480324
chromosome	KZA74_10045	2,114,229..2,114,702	474	=>	Rrf2 family transcriptional regulator	iscR	ACX60_RS09780	ABUW_2201	A1S_1634	KZA74_10045	628.894	0.273371	-0.465605	2.02619	0.973209	0.837046	1.51909e-07
chromosome	KZA74_10050	2,114,704..2,115,921	1218	=>	IscS subfamily cysteine desulfurase	iscS, NFS1	ACX60_RS09785	ABUW_2202	A1S_1632	KZA74_10050	2059.29	0.408967	-0.588912	1.56567	0.973209	0.837046	0.0080173
chromosome	KZA74_10080	2,119,631..2,121,100	1470	<=	adenylate/guanylate cyclase domain-containingprotein	E4.6.1.1	ACX60_RS09815	ABUW_2208	A1S_1625	KZA74_10080	915.912	-0.471583	-0.379431	1.02906	0.973209	0.837046	0.00131776
chromosome	KZA74_10150	2,134,316..2,135,458	1143	<=	ABC transporter permease	gsiB, ABC.PE.P1	ACX60_RS09885	ABUW_2222	A1S_1612	KZA74_10150	549.83	-0.467607	-0.359825	-0.0937607	0.973209	0.837046	0.79094
chromosome	KZA74_10155	2,135,466..2,136,404	939	<=	ABC transporter permease	gsiC, ABC.PE.P	ACX60_RS09890	ABUW_2223	A1S_1611	KZA74_10155	491.19	-0.483887	-0.469669	0.159348	0.973209	0.837046	0.732954
chromosome	KZA74_10160	2,136,417..2,138,450	2034	<=	Zn-dependent oligopeptidase	THOP1, prlC_2	ACX60_RS09895	ABUW_2224	A1S_1610	KZA74_10160	1162.83	-0.543214	-0.591588	0.215865	0.973209	0.837046	0.627966
chromosome	KZA74_10205	2,148,240..2,148,689	450	<=	GNAT family N-acetyltransferase	speG, SAT	ACX60_RS09935	NA	A1S_1602	KZA74_10205	73.5668	0.732636	1.00152	-0.402657	0.973209	0.837046	0.480674
chromosome	KZA74_10250	2,158,906..2,159,412	507	<=	KZA74_10250	NA	ACX60_RS09985	NA	A1S_3702	KZA74_10250	133.499	0.245251	0.342869	-0.57573	0.973209	0.837046	0.087253
chromosome	KZA74_10365	2,174,536..2,174,964	429	<=	KZA74_10365	NA	ACX60_RS10100	NA	A1S_3692	KZA74_10365	330.801	-0.654181	-0.721613	0.230096	0.973209	0.837046	0.699137
chromosome	KZA74_10370	2,175,289..2,175,459	171	<=	KZA74_10370	NA	ACX60_RS10105	NA	NA	KZA74_10370	42.7618	0.554619	0.868186	-1.59718	0.973209	0.837046	0.0124481
chromosome	KZA74_10425	2,182,014..2,182,451	438	=>	KZA74_10425	NA	NA	NA	NA	KZA74_10425	58.7911	0.365383	0.504469	-2.30768	0.973209	0.837046	2.19561e-06
chromosome	KZA74_10525	2,196,557..2,197,681	1125	<=	enoyl-CoA hydratase/isomerase family protein	NA	ACX60_RS10255	ABUW_2246	A1S_1568	KZA74_10525	1731.01	-0.613995	-0.683575	0.641179	0.973209	0.837046	0.225543
chromosome	KZA74_10535	2,198,442..2,199,038	597	<=	6-carboxytetrahydropterin synthase	queD, ptpS, PTS	ACX60_RS10265	ABUW_2248	A1S_1566	KZA74_10535	883.833	-0.427938	-0.708439	0.998909	0.973209	0.837046	0.0942003
chromosome	KZA74_10565	2,202,508..2,203,281	774	<=	TatD family hydrolase	tatD	ACX60_RS10295	ABUW_2254	A1S_1560	KZA74_10565	797.895	-0.560047	-0.585373	0.440616	0.973209	0.837046	0.292247
chromosome	kdsB	2,204,644..2,205,405	762	<=	kdsB, 3-deoxy-manno-octulosonate cytidylyltransferase	kdsB	ACX60_RS10310	ABUW_2257	A1S_1557	KZA74_10580	643.108	-0.348984	-0.407227	0.538954	0.973209	0.837046	0.0467461
chromosome	KZA74_10610	2,210,165..2,210,947	783	<=	AAA family ATPase	parA, soj	ACX60_RS10340	ABUW_2263	A1S_1551	KZA74_10610	619.66	-0.216108	-0.312236	0.601119	0.973209	0.837046	0.0369216
chromosome	rsmG	2,210,969..2,211,601	633	<=	rsmG, 16S rRNA (guanine(527)-N(7))-methyltransferaseRsmG	gidB, rsmG	ACX60_RS10345	ABUW_2264	A1S_1550	KZA74_10615	474.064	-0.293884	-0.337758	0.357094	0.973209	0.837046	0.300989
chromosome	KZA74_10625	2,212,378..2,213,391	1014	<=	phosphotransferase	amgK	ACX60_RS10355	ABUW_2266	A1S_1548	KZA74_10625	603.828	-0.332086	-0.349054	1.27655	0.973209	0.837046	1.02013e-05
chromosome	KZA74_10630	2,213,512..2,215,950	2439	=>	LPS-assembly protein LptD	lptD, imp, ostA	ACX60_RS10360	ABUW_2267	A1S_1546	KZA74_10630	1811.94	-0.44924	-0.456917	1.32184	0.973209	0.837046	5.77803e-05
chromosome	KZA74_10635	2,215,950..2,217,260	1311	=>	peptidylprolyl isomerase	surA	ACX60_RS10365	ABUW_2268	A1S_1545	KZA74_10635	1456.52	-0.46252	-0.491189	1.47192	0.973209	0.837046	0.00271484
chromosome	KZA74_10660	2,220,614..2,221,207	594	=>	Maf family nucleotide pyrophosphatase	NA	ACX60_RS10390	ABUW_2273	A1S_1542	KZA74_10660	218.033	-0.460011	-0.428671	1.1741	0.973209	0.837046	1.08101e-05
chromosome	sstT	2,224,511..2,225,713	1203	=>	sstT, serine/threonine transporter SstT	sstT	ACX60_RS10410	ABUW_2277	A1S_1538	KZA74_10680	703.593	-0.405463	-0.395174	1.76873	0.973209	0.837046	1.90999e-12
chromosome	KZA74_10695	2,227,314..2,229,161	1848	=>	ABC transporter ATP-binding protein/permease	vcaM	ACX60_RS10425	ABUW_2280	A1S_1535	KZA74_10695	886.723	-0.353131	-0.45149	0.365012	0.973209	0.837046	0.124749
chromosome	gcvH	2,230,774..2,231,148	375	=>	gcvH, glycine cleavage system protein GcvH	gcvH, GCSH	ACX60_RS10440	ABUW_2283	A1S_1532	KZA74_10710	418.082	-0.412927	-0.543988	1.02947	0.973209	0.837046	0.0167384
chromosome	KZA74_10735	2,238,351..2,238,824	474	=>	GrpB family protein	NA	ACX60_RS10465	ABUW_2288	NA	KZA74_10735	67.6672	0.458743	0.508158	0.161733	0.973209	0.837046	0.770073
chromosome	KZA74_10765	2,242,903..2,243,310	408	=>	OsmC family protein	yhfA	ACX60_RS10495	ABUW_2294	A1S_1522	KZA74_10765	332.836	-0.741306	-0.499562	1.06513	0.973209	0.837046	0.0284794
chromosome	KZA74_10840	2,256,477..2,257,013	537	=>	type 1 fimbrial protein	fimA	ACX60_RS10570	ABUW_2310	A1S_1510	KZA74_10840	186.798	-0.24967	-0.468375	-0.499026	0.973209	0.837046	0.252236
chromosome	KZA74_10860	2,262,006..2,262,185	180	=>	KZA74_10860	NA	ACX60_RS10590	ABUW_2314	NA	KZA74_10860	21.952	0.448982	1.19875	-0.481476	0.973209	0.837046	0.525534
chromosome	KZA74_10935	2,275,629..2,276,372	744	<=	amino acid ABC transporter ATP-binding protein	gltL, aatP	ACX60_RS10665	ABUW_2330	A1S_1493	KZA74_10935	1213.44	-0.655556	-0.765132	-0.454576	0.973209	0.837046	0.450576
chromosome	KZA74_10940	2,276,386..2,277,063	678	<=	amino acid ABC transporter permease	gltK, aatM	ACX60_RS10670	ABUW_2331	A1S_1492	KZA74_10940	617.471	-0.612538	-0.77438	-0.699343	0.973209	0.837046	0.17299
chromosome	KZA74_10945	2,277,066..2,277,908	843	<=	amino acid ABC transporter permease	gltJ, aatQ	ACX60_RS10675	ABUW_2332	A1S_1491	KZA74_10945	671.31	-0.31808	-0.608929	-0.57673	0.973209	0.837046	0.173429
chromosome	purT	2,293,249..2,294,466	1218	=>	purT, formate-dependent phosphoribosylglycinamide formyltransferase	purT	ACX60_RS10765	ABUW_2350	A1S_1475	KZA74_11035	1227.44	-0.200142	-0.288656	1.23448	0.973209	0.837046	2.02357e-06
chromosome	KZA74_11060	2,299,955..2,300,440	486	<=	glutathione peroxidase	gpx	ACX60_RS10790	ABUW_2355	A1S_1470	KZA74_11060	755.424	-0.427029	-0.786569	0.249121	0.973209	0.837046	0.766151
chromosome	dnaE	2,306,267..2,309,830	3564	=>	dnaE, DNA polymerase III subunit alpha	dnaE	ACX60_RS10815	ABUW_2360	A1S_1465	KZA74_11085	2424.64	-0.424673	-0.448875	1.05314	0.973209	0.837046	0.000656585
chromosome	KZA74_11090	2,309,845..2,310,684	840	=>	RNA methyltransferase	trmJ	ACX60_RS10820	ABUW_2361	A1S_1464	KZA74_11090	449.096	-0.446445	-0.542516	0.463191	0.973209	0.837046	0.16755
chromosome	ahpF	2,314,714..2,316,279	1566	<=	ahpF, alkyl hydroperoxide reductase subunit F	ahpF	ACX60_RS10840	ABUW_2365	A1S_1460	KZA74_11110	628.096	-0.434672	-0.508088	-0.260707	0.973209	0.837046	0.383834
chromosome	KZA74_11160	2,323,990..2,324,880	891	=>	LysR family transcriptional regulator	NA	ACX60_RS10890	ABUW_2375	A1S_1449	KZA74_11160	157.466	0.310633	0.31851	-0.00746209	0.973209	0.837046	0.983669
chromosome	KZA74_11225	2,339,740..2,341,185	1446	=>	cydA, cytochrome ubiquinol oxidase subunit I	cydA	ACX60_RS10955	ABUW_2389	A1S_1434	KZA74_11225	813.08	-0.384253	-0.660315	-1.49283	0.973209	0.837046	2.1619e-05
chromosome	yghU	2,361,122..2,361,982	861	=>	yghU, glutathione-dependent disulfide-bondoxidoreductase	yghU, yfcG	ACX60_RS11075	ABUW_2411	A1S_1411	KZA74_11345	703.384	-0.400075	-0.455991	0.571596	0.973209	0.837046	0.106126
chromosome	KZA74_11380	2,369,016..2,369,137	122	<=	KZA74_11380	NA	NA	NA	NA	KZA74_11380	70.77	0.626486	0.846084	-3.80134	0.973209	0.837046	7.43157e-09
chromosome	katE	2,387,723..2,389,867	2145	<=	katE, catalase HPII	katE, CAT, catB, srpA	ACX60_RS11200	ABUW_2436	A1S_1386	KZA74_11485	4900.64	-1.0755	-0.975162	-0.205474	0.973209	0.837046	0.802773
chromosome	KZA74_11510	2,393,100..2,393,360	261	<=	KZA74_11510	NA	ACX60_RS11225	ABUW_2441	A1S_3660	KZA74_11510	57.8589	0.36412	0.537431	-0.62811	0.973209	0.837046	0.240893
chromosome	KZA74_11515	2,393,448..2,393,876	429	<=	KZA74_11515	NA	ACX60_RS11230	ABUW_2442	A1S_3659	KZA74_11515	48.8111	0.417885	0.641916	-0.167689	0.973209	0.837046	0.799412
chromosome	KZA74_11520	2,394,146..2,394,289	144	<=	KZA74_11520		ACX60_RS11235	NA	NA	KZA74_11520	31.7116	0.305334	0.575114	-0.397809	0.973209	0.837046	0.372904
chromosome	KZA74_11525	2,395,258..2,395,548	291	=>	KZA74_11525	NA	ACX60_RS11240	ABUW_2445	NA	KZA74_11525	109.232	0.393531	0.600232	-0.101472	0.973209	0.837046	0.878488
chromosome	KZA74_11600	2,415,501..2,416,127	627	=>	LysE family translocator	NA	ACX60_RS11315	NA	A1S_1366	KZA74_11600	90.4707	0.70172	0.868227	-1.43446	0.973209	0.837046	0.00934975
chromosome	KZA74_11680	2,433,771..2,434,373	603	<=	TetR/AcrR family transcriptional regulator	NA	ACX60_RS11395	ABUW_2520	A1S_1350	KZA74_11680	124.052	0.817695	0.791658	-3.05918	0.973209	0.837046	3.91716e-09
chromosome	paaX	2,439,254..2,440,219	966	<=	paaX, phenylacetic acid degradation operon negativeregulatory protein PaaX	paaX	ACX60_RS11425	ABUW_2525	A1S_1347	KZA74_11710	1207.88	-0.709044	-0.936347	-1.35846	0.973209	0.837046	0.0754941
chromosome	paaF	2,440,273..2,441,562	1290	<=	paaF, phenylacetate--CoA ligase	paaF	ACX60_RS11430	ABUW_2526	A1S_1345	KZA74_11715	3513.38	-0.797768	-1.20637	-2.49369	0.973209	0.837046	0.0200427
chromosome	KZA74_11815	2,463,117..2,463,800	684	<=	GntR family transcriptional regulator	NA	ACX60_RS11530	ABUW_2549	A1S_1324	KZA74_11815	355.431	-0.462896	-0.362471	-0.90427	0.973209	0.837046	0.00827215
chromosome	KZA74_11910	2,482,885..2,483,148	264	<=	PAAR domain-containing protein	NA	ACX60_RS11625	ABUW_2570	A1S_1306	KZA74_11910	115.035	-0.28157	-0.300391	-1.16469	0.973209	0.837046	2.29705e-05
chromosome	KZA74_11930	2,488,787..2,490,199	1413	<=	KZA74_11930	NA	ACX60_RS11645	ABUW_2574	A1S_1301	KZA74_11930	207.182	0.470872	0.579022	-1.09713	0.973209	0.837046	0.027049
chromosome	KZA74_11965	2,496,089..2,496,781	693	<=	KZA74_11965	NA	ACX60_RS11680	ABUW_2581	A1S_1292	KZA74_11965	97.5169	0.741474	0.644094	-0.40438	0.973209	0.837046	0.467822
chromosome	KZA74_12060	2,521,538..2,522,098	561	<=	TetR/AcrR family transcriptional regulator	NA	ACX60_RS11775	ABUW_2596	A1S_1272	KZA74_12060	64.4475	0.536315	0.702854	-1.87503	0.973209	0.837046	0.00439112
chromosome	KZA74_12075	2,526,003..2,527,721	1719	<=	N5-carboxyaminoimidazole ribonucleotide synthase	mumC, bccA, purK	ACX60_RS11790	ABUW_2603	A1S_1270	KZA74_12075	4297.58	-1.71401	-1.63211	-2.6511	0.973209	0.837046	0.0341399
chromosome	KZA74_12080	2,527,721..2,529,304	1584	<=	urea amidolyase family protein	mumH, atzF	ACX60_RS11795	ABUW_2604	A1S_1269	KZA74_12080	2714.71	-1.76345	-1.71891	-2.83016	0.973209	0.837046	0.0113917
chromosome	KZA74_12085	2,529,337..2,530,143	807	<=	putative hydro-lyase	mumU	ACX60_RS11800	ABUW_2605	A1S_1268	KZA74_12085	1791.69	-1.92049	-1.98121	-3.36425	0.973209	0.837046	0.030337
chromosome	KZA74_12090	2,530,155..2,530,919	765	<=	LamB/YcsF family protein	mumL	ACX60_RS11805	ABUW_2606	A1S_1267	KZA74_12090	2453.2	-1.68986	-1.86489	-3.53397	0.973209	0.837046	0.00674426
chromosome	KZA74_12095	2,530,954..2,532,207	1254	<=	divalent metal cation transporter	mumT	ACX60_RS11810	ABUW_2607	A1S_1266	KZA74_12095	3078.33	-1.92822	-2.1245	-3.54731	0.973209	0.837046	0.0139404
chromosome	KZA74_12130	2,537,870..2,538,064	195	<=	KZA74_12130	NA	NA	NA	NA	KZA74_12130	47.5253	0.541114	0.754194	1.04717	0.973209	0.837046	0.0107172
chromosome	KZA74_12140	2,539,423..2,540,121	699	=>	DUF1826 domain-containing protein	NA	ACX60_RS11850	ABUW_2624	A1S_1260	KZA74_12140	101.388	0.312018	0.475759	-0.933639	0.973209	0.837046	0.0556292
chromosome	KZA74_12150	2,541,696..2,542,133	438	=>	DUF2147 domain-containing protein	NA	ACX60_RS11860	ABUW_2627	A1S_1258	KZA74_12150	282.788	-0.601573	-0.756506	-0.154654	0.973209	0.837046	0.821674
chromosome	KZA74_12190	2,550,430..2,550,897	468	=>	Lrp/AsnC family transcriptional regulator	NA	ACX60_RS11900	ABUW_2633	NA	KZA74_12190	48.9698	0.718361	0.881343	-0.291746	0.973209	0.837046	0.676825
chromosome	KZA74_12200	2,553,882..2,554,412	531	=>	GNAT family N-acetyltransferase	NA	ACX60_RS11910	ABUW_2635	A1S_1250	KZA74_12200	252.829	-0.418877	-0.331312	0.914351	0.973209	0.837046	0.00262648
chromosome	KZA74_12220	2,556,857..2,557,699	843	<=	usp, universal stress protein	NA	ACX60_RS11930	ABUW_2639	A1S_1246	KZA74_12220	1689.83	-0.429174	-0.943363	0.0927359	0.973209	0.837046	0.902193
chromosome	lptB	2,564,217..2,564,963	747	<=	lptB, LPS export ABC transporter ATP-binding protein	lptB	ACX60_RS11960	ABUW_2645	A1S_1240	KZA74_12250	872.224	-0.354589	-0.693896	0.988822	0.973209	0.837046	0.0369216
chromosome	lptA	2,564,963..2,565,511	549	<=	lptA, lipopolysaccharide transport periplasmic proteinLptA	lptA	ACX60_RS11965	ABUW_2646	A1S_1239	KZA74_12255	793.847	-0.343744	-0.795761	1.02961	0.973209	0.837046	0.0406652
chromosome	lptC	2,565,495..2,566,043	549	<=	lptC, LPS export ABC transporter periplasmic proteinLptC	lptC	ACX60_RS11970	ABUW_2647	A1S_1238	KZA74_12260	711.49	-0.348349	-0.499916	1.04682	0.973209	0.837046	0.0124387
chromosome	KZA74_12265	2,566,081..2,566,620	540	<=	HAD-IIIA family hydrolase	kdsC	ACX60_RS11975	ABUW_2648	A1S_1237	KZA74_12265	623.517	-0.16041	-0.470456	0.250545	0.973209	0.837046	0.452997
chromosome	KZA74_12270	2,566,624..2,567,601	978	<=	KpsF/GutQ family sugar-phosphate isomerase	kdsD, kpsF	ACX60_RS11980	ABUW_2649	A1S_1236	KZA74_12270	1510.93	-0.661241	-0.688434	1.23785	0.973209	0.837046	0.00548994
chromosome	cysS	2,567,815..2,569,236	1422	=>	cysS, cysteine--tRNA ligase	CARS, cysS	ACX60_RS11985	ABUW_2650	A1S_1235	KZA74_12275	1636.78	-0.49655	-0.7891	1.27921	0.973209	0.837046	0.0058106
chromosome	KZA74_12345	2,579,585..2,580,202	618	=>	LysE family translocator	NA	ACX60_RS12060	ABUW_2692	A1S_1227	KZA74_12345	119.324	0.41846	0.662873	0.0997848	0.973209	0.837046	0.848984
chromosome	KZA74_12365	2,582,628..2,582,861	234	<=	transposase	NA	ACX60_RS12080	ABUW_2696	A1S_1224	KZA74_12365	853.447	-0.935253	-0.796603	2.60135	0.973209	0.837046	4.09799e-06
chromosome	KZA74_12395	2,586,351..2,586,680	330	=>	KZA74_12395	NA	ACX60_RS12115	ABUW_2702	A1S_3628	KZA74_12395	376.657	0.281438	0.709076	3.75376	0.973209	0.837046	2.90402e-28
chromosome	cueR	2,588,545..2,588,946	402	<=	cueR	cueR	ACX60_RS12130	ABUW_2706	A1S_1218	KZA74_12410	471.409	-1.09365	-0.816735	1.8855	0.973209	0.837046	0.00451244
chromosome	KZA74_12415	2,589,022..2,591,493	2472	<=	actP_2, Copper-transporting P-type ATPase	copA, ATP7	ACX60_RS12135	ABUW_2707	A1S_1217	KZA74_12415	6824.28	-1.12944	-1.01737	2.47835	0.973209	0.837046	0.0102943
chromosome	KZA74_12480	2,607,578..2,607,793	216	=>	KTSC domain-containing protein	NA	ACX60_RS12200	ABUW_2720	A1S_1204	KZA74_12480	208.513	-0.48539	0.483019	1.00207	0.973209	0.837046	0.0225097
chromosome	KZA74_12530	2,616,903..2,618,318	1416	<=	OmpA family protein	NA	ACX60_RS12250	ABUW_2730	A1S_1193	KZA74_12530	3240.21	-0.949903	-1.03457	-0.71795	0.973209	0.837046	0.413487
chromosome	KZA74_12535	2,618,532..2,619,767	1236	<=	dihydroorotase	URA4, pyrC	ACX60_RS12255	ABUW_2731	A1S_1191	KZA74_12535	1088.62	-0.499559	-0.770933	0.296629	0.973209	0.837046	0.471802
chromosome	KZA74_12540	2,619,780..2,620,796	1017	<=	aspartate carbamoyltransferase catalyticsubunit	pyrB, PYR2	ACX60_RS12260	ABUW_2732	A1S_1190	KZA74_12540	587.35	-0.386456	-0.515455	0.651341	0.973209	0.837046	0.028979
chromosome	rlmKL	2,621,503..2,623,707	2205	=>	rlmKL, bifunctional 23S rRNA (guanine(2069)-N(7))-methyltransferase RlmK/23S rRNA (guanine(2445)-N(2))-methyltransferase RlmL	rlmL, rlmK	ACX60_RS12270	ABUW_2734	A1S_1188	KZA74_12550	1844.51	-0.477257	-0.463545	1.53547	0.973209	0.837046	0.000118157
chromosome	clpB	2,624,964..2,627,543	2580	<=	clpB, ATP-dependent chaperone ClpB	clpB	ACX60_RS12285	ABUW_2737	A1S_1186	KZA74_12565	20190.4	-0.67608	-1.07954	0.0754023	0.973209	0.837046	0.944557
chromosome	KZA74_12580	2,629,166..2,629,588	423	<=	OsmC family protein	yhfA	ACX60_RS12300	ABUW_2740	A1S_1183	KZA74_12580	884.56	-0.552612	-0.904173	0.466047	0.973209	0.837046	0.395155
chromosome	KZA74_12605	2,632,900..2,633,217	318	<=	KZA74_12605	NA	ACX60_RS12320	ABUW_2744	NA	KZA74_12605	65.5538	0.722642	0.702492	0.391856	0.973209	0.837046	0.530411
chromosome	KZA74_12615	2,634,724..2,635,890	1167	<=	ATP phosphoribosyltransferase regulatorysubunit	hisZ	ACX60_RS12330	ABUW_2746	A1S_1178	KZA74_12615	2294.26	-0.279561	-0.797845	1.47925	0.973209	0.837046	0.00293017
chromosome	KZA74_12720	2,659,189..2,659,503	315	<=	KZA74_12720	NA	ACX60_RS12435	NA	A1S_3618	KZA74_12720	57.6107	-0.379722	-0.636239	-3.00545	0.973209	0.837046	1.6423e-06
chromosome	KZA74_12775	2,665,555..2,666,106	552	=>	KZA74_12775	NA	ACX60_RS12495	NA	A1S_3615	KZA74_12775	121.897	0.398251	0.729581	-0.192261	0.973209	0.837046	0.681365
chromosome	KZA74_12820	2,671,921..2,672,655	735	<=	KZA74_12820	NA	ACX60_RS12540	NA	A1S_3614	KZA74_12820	218.619	0.357811	0.567215	-3.05661	0.973209	0.837046	2.96581e-10
chromosome	KZA74_12875	2,677,821..2,678,612	792	=>	helix-turn-helix domain-containing protein	NA	ACX60_RS12595	NA	A1S_1144	KZA74_12875	319.276	0.39047	0.341139	0.455028	0.973209	0.837046	0.138379
chromosome	rnhB	2,684,840..2,685,406	567	<=	rnhB, ribonuclease HII	rnhB	ACX60_RS12655	ABUW_2751	A1S_1140	KZA74_12935	345.755	-0.243114	-0.231569	-0.209966	0.973209	0.837046	0.352676
chromosome	KZA74_12940	2,685,472..2,685,861	390	<=	KZA74_12940	NA	ACX60_RS12660	ABUW_2752	A1S_1139	KZA74_12940	391.283	-0.831411	-0.985226	0.61023	0.973209	0.837046	0.25186
chromosome	KZA74_12955	2,687,812..2,689,131	1320	<=	NCS2 family permease	pbuG	ACX60_RS12675	ABUW_2755	A1S_1135	KZA74_12955	1205.26	-0.2727	-0.410632	0.742686	0.973209	0.837046	0.00315981
chromosome	KZA74_13155	2,736,454..2,736,792	339	<=	KZA74_13155	NA	ACX60_RS12875	ABUW_2795	NA	KZA74_13155	58.7831	0.333422	0.62588	-1.41803	0.973209	0.837046	0.00347271
chromosome	KZA74_13165	2,737,513..2,737,827	315	<=	KZA74_13165	NA	ACX60_RS12885	ABUW_2797	NA	KZA74_13165	64.0033	0.520682	0.642416	-2.66549	0.973209	0.837046	3.26271e-06
chromosome	KZA74_13195	2,744,673..2,745,443	771	=>	nuclear transport factor 2 family protein	ntf2	ACX60_RS12915	ABUW_2803	A1S_1088	KZA74_13195	726.566	-0.855759	-0.656489	-1.55118	0.973209	0.837046	0.00432047
chromosome	KZA74_13230	2,752,466..2,752,936	471	=>	KZA74_13230	NA	ACX60_RS12950	NA	A1S_3599	KZA74_13230	104.721	0.382376	0.557852	0.696456	0.973209	0.837046	0.0770129
chromosome	KZA74_13240	2,754,264..2,754,770	507	<=	KZA74_13240	NA	ACX60_RS12960	NA	NA	KZA74_13240	56.6342	0.538734	1.08042	-0.334365	0.973209	0.837046	0.608602
chromosome	KZA74_13245	2,754,945..2,755,823	879	<=	NLPA lipoprotein	metQ	ACX60_RS12965	ABUW_2820	A1S_1080	KZA74_13245	744.314	-0.495339	-0.833801	1.10923	0.973209	0.837046	0.0318682
chromosome	KZA74_13255	2,758,489..2,759,307	819	=>	alpha/beta hydrolase	NA	ACX60_RS12975	NA	A1S_1078	KZA74_13255	76.5208	0.442102	0.780258	-2.54386	0.973209	0.837046	7.96599e-05
chromosome	KZA74_13300	2,778,124..2,778,735	612	<=	KZA74_13300	NA	ACX60_RS13025	NA	A1S_3595	KZA74_13300	115.504	0.489908	0.76297	-1.14836	0.973209	0.837046	0.0428407
chromosome	KZA74_13325	2,783,239..2,784,501	1263	<=	GGDEF domain-containing protein	NA	ACX60_RS13050	ABUW_2824	A1S_1067	KZA74_13325	350.823	0.270206	0.462013	-0.537199	0.973209	0.837046	0.248779
chromosome	rnt	2,785,670..2,786,332	663	=>	rnt, ribonuclease T	rnt	ACX60_RS13060	ABUW_2826	A1S_1065	KZA74_13335	636.144	-0.482766	-0.588689	1.51637	0.973209	0.837046	1.83933e-05
chromosome	yejB	2,792,790..2,793,842	1053	<=	yejB, microcin C ABC transporter permease YejB	yejB	ACX60_RS13090	ABUW_2838	A1S_1057	KZA74_13365	359.089	0.392366	0.478893	-0.41678	0.973209	0.837046	0.265247
chromosome	KZA74_13375	2,795,723..2,798,938	3216	<=	LysM peptidoglycan-binding domain-containingprotein	NA	ACX60_RS13100	ABUW_2840	A1S_1055	KZA74_13375	6897.93	-0.576059	-0.720298	1.10018	0.973209	0.837046	0.0818684
chromosome	nudC	2,802,327..2,803,070	744	=>	nudC, NAD(+) diphosphatase	E3.6.1.22, NUDT12, nudC	ACX60_RS13115	ABUW_2843	A1S_1052	KZA74_13390	634.525	-0.240469	-0.417708	0.748221	0.973209	0.837046	0.0467605
chromosome	KZA74_13405	2,804,748..2,805,149	402	<=	YraN family protein	yraN	ACX60_RS13130	ABUW_2846	A1S_1049	KZA74_13405	139.016	0.46519	0.592253	-2.53995	0.973209	0.837046	5.21188e-07
chromosome	KZA74_13415	2,806,274..2,806,660	387	=>	hemin receptor	NA	ACX60_RS13140	ABUW_2848	A1S_3592	KZA74_13415	61.8672	0.329587	0.593461	-1.22259	0.973209	0.837046	0.0229427
chromosome	KZA74_13445	2,809,945..2,811,177	1233	<=	FAD-dependent monooxygenase	ubiI	ACX60_RS13170	ABUW_2854	A1S_1041	KZA74_13445	1058.86	-0.33946	-0.38568	-0.322105	0.973209	0.837046	0.251661
chromosome	nth	2,832,784..2,833,476	693	=>	nth, endonuclease III	NTH	ACX60_RS13255	ABUW_2871	A1S_1024	KZA74_13540	241.342	-0.323184	-0.333653	-0.0774921	0.973209	0.837046	0.77586
chromosome	adk	2,833,715..2,834,368	654	<=	adk, adenylate kinase	adk, AK	ACX60_RS13260	ABUW_2873	A1S_1023	KZA74_13550	1552.26	0.404743	-0.61669	1.36116	0.973209	0.837046	0.00701799
chromosome	KZA74_13555	2,834,455..2,835,768	1314	<=	KZA74_13555	NA	ACX60_RS13265	ABUW_2874	A1S_1022	KZA74_13555	1244.17	-0.214297	-0.406341	0.530217	0.973209	0.837046	0.0927816
chromosome	KZA74_13585	2,840,412..2,841,077	666	<=	urease accessory protein	ureF	ACX60_RS13295	ABUW_2880	A1S_1016	KZA74_13585	217.317	-0.661953	-0.658054	-0.874445	0.973209	0.837046	0.034109
chromosome	KZA74_13600	2,843,329..2,843,787	459	<=	GNAT family N-acetyltransferase	NA	ACX60_RS13310	NA	A1S_3588	KZA74_13600	111.872	0.405236	0.597376	-1.42341	0.973209	0.837046	0.00573291
chromosome	KZA74_13620	2,845,584..2,845,907	324	=>	KZA74_13620	NA	ACX60_RS13330	ABUW_2886	A1S_1010	KZA74_13620	61.6461	0.452174	0.818413	0.72684	0.973209	0.837046	0.0930783
chromosome	KZA74_13630	2,846,653..2,848,257	1605	<=	isocitrate lyase	E4.1.3.1, aceA	ACX60_RS13340	ABUW_2888	A1S_1008	KZA74_13630	4638.68	0.859584	-0.814116	1.0305	0.973209	0.837046	0.202355
chromosome	KZA74_13655	2,853,957..2,854,505	549	=>	DUF2239 family protein	K09965	ACX60_RS13365	ABUW_2894	A1S_1002	KZA74_13655	169.055	0.336859	0.418757	1.94123	0.973209	0.837046	9.63548e-10
chromosome	cysD	2,856,202..2,857,110	909	<=	cysD, sulfate adenylyltransferase subunit CysD	cysD	ACX60_RS13375	ABUW_2896	A1S_1000	KZA74_13665	1894.42	-0.782053	-0.738651	1.19108	0.973209	0.837046	0.0465717
chromosome	lysS	2,859,125..2,860,654	1530	<=	lysS, lysine--tRNA ligase	KARS, lysS	ACX60_RS13385	ABUW_2899	A1S_0998	KZA74_13680	2977.76	-0.389408	-0.677925	1.91759	0.973209	0.837046	0.000605175
chromosome	KZA74_13700	2,862,608..2,863,789	1182	=>	FAD-dependent oxidoreductase	rubB, alkT	ACX60_RS13405	ABUW_2903	A1S_0994	KZA74_13700	995.852	-0.286917	-0.30807	0.832124	0.973209	0.837046	0.00567159
chromosome	KZA74_13715	2,865,733..2,866,323	591	<=	SPOR domain-containing protein	NA	ACX60_RS13420	ABUW_2906	A1S_0991	KZA74_13715	112.349	0.380741	0.68886	-3.44874	0.973209	0.837046	2.24357e-08
chromosome	KZA74_13720	2,866,381..2,866,509	129	=>	KZA74_13720	NA	NA	NA	NA	KZA74_13720	6.36369	0.737849	1.44559	-3.4196	0.973209	0.837046	0.0122571
chromosome	KZA74_13810	2,887,745..2,889,376	1632	<=	Low-affinity inorganic phosphate transporter 1	TC.PIT, pitA_2	ACX60_RS13510	ABUW_2925	A1S_0972	KZA74_13810	2021.3	-0.409714	-0.549328	1.36046	0.973209	0.837046	0.000720956
chromosome	hemB	2,967,422..2,968,435	1014	=>	hemB, porphobilinogen synthase	hemB, ALAD	ACX60_RS13850	ABUW_3022	A1S_0906	KZA74_14160	1224.85	-0.307865	-0.563796	0.96064	0.973209	0.837046	0.00793827
chromosome	KZA74_14175	2,970,562..2,971,014	453	<=	ABZJ_00895 family protein	NA	ACX60_RS13865	ABUW_3025	A1S_0903	KZA74_14175	174.449	0.328271	0.473793	1.00401	0.973209	0.837046	0.000602773
chromosome	KZA74_14200	2,977,553..2,978,245	693	<=	YggS family pyridoxal phosphate-dependentenzyme	yggS, PROSC	ACX60_RS13890	ABUW_3030	A1S_0898	KZA74_14200	442.215	-0.196929	-0.347525	-0.174913	0.973209	0.837046	0.59215
chromosome	KZA74_14225	2,981,627..2,981,950	324	<=	RnfH family protein	rnfH, K09801	ACX60_RS13915	ABUW_3035	A1S_0893	KZA74_14225	604.503	-0.386325	-1.0196	0.235442	0.973209	0.837046	0.708735
chromosome	argB	2,985,738..2,986,646	909	<=	argB, acetylglutamate kinase	argB	ACX60_RS13940	ABUW_3040	A1S_0888	KZA74_14250	1148.72	-0.61451	-0.504244	-0.553835	0.973209	0.837046	0.287961
chromosome	KZA74_14255	2,986,661..2,988,079	1419	<=	phosphomannomutase/phosphoglucomutase	pmm-pgm	ACX60_RS13945	ABUW_3041	A1S_0887	KZA74_14255	874.972	-0.422044	-0.408754	0.575465	0.973209	0.837046	0.152196
chromosome	rep	2,988,756..2,990,795	2040	<=	rep, DNA helicase Rep	rep	ACX60_RS13955	ABUW_3043	A1S_0885	KZA74_14265	1002.47	-0.17752	-0.24938	0.766416	0.973209	0.837046	0.00100273
chromosome	KZA74_14310	2,997,062..3,000,094	3033	<=	ftsK, DNA translocase FtsK 4TM domain-containingprotein	ftsK, spoIIIE	ACX60_RS14000	ABUW_3053	A1S_0876	KZA74_14310	6127.57	-0.502542	-0.709027	0.339405	0.973209	0.837046	0.588329
chromosome	aat	3,001,432..3,002,163	732	=>	aat, leucyl/phenylalanyl-tRNA--protein transferase	aat	ACX60_RS14010	ABUW_3055	A1S_0874	KZA74_14320	435.883	0.153136	0.240735	0.313419	0.973209	0.837046	0.177749
chromosome	KZA74_14390	3,015,999..3,017,624	1626	=>	NAD+ synthase	nadE, E6.3.5.1, NADSYN1, QNS1, nadE	ACX60_RS14080	ABUW_3069	A1S_0858	KZA74_14390	2741.37	-0.550292	-0.745473	1.29242	0.973209	0.837046	0.0335722
chromosome	KZA74_14440	3,027,506..3,028,690	1185	<=	OprO/OprP family phosphate-selective porin	oprO	ACX60_RS14130	ABUW_3079	A1S_0847	KZA74_14440	317.209	0.318336	0.447902	-2.18626	0.973209	0.837046	6.48052e-08
chromosome	KZA74_14455	3,029,363..3,029,626	264	<=	YfhL family 4Fe-4S dicluster ferredoxin	yfhL, fdx_2	NA	NA	A1S_0846	KZA74_14455	336.271	-0.747033	-0.725992	-0.0547522	0.973209	0.837046	0.927103
chromosome	smpB	3,030,255..3,030,731	477	=>	smpB, SsrA-binding protein SmpB	smpB	ACX60_RS14150	ABUW_3083	A1S_0844	KZA74_14465	713.398	-0.524453	-0.405929	0.464663	0.973209	0.837046	0.28272
chromosome	pgeF	3,031,545..3,032,282	738	<=	pgeF, peptidoglycan editing factor PgeF	yfiH, pgeF	ACX60_RS14160	ABUW_3085	A1S_0842	KZA74_14475	608.581	-0.424305	-0.344272	-0.207922	0.973209	0.837046	0.511204
chromosome	KZA74_14485	3,033,417..3,034,574	1158	=>	bamD, outer membrane protein assembly factor BamD	bamD	ACX60_RS14170	ABUW_3087	A1S_0840	KZA74_14485	2876.64	-0.809426	-0.871449	1.17566	0.973209	0.837046	0.0843796
chromosome	KZA74_14490	3,034,733..3,036,598	1866	=>	DNA primase	dnaG	ACX60_RS14175	ABUW_3088	A1S_0838	KZA74_14490	1432.75	-0.445045	-0.351371	0.831062	0.973209	0.837046	0.0045498
chromosome	hemA	3,036,595..3,037,878	1284	<=	hemA, glutamyl-tRNA reductase	hemA	ACX60_RS14180	ABUW_3089	A1S_0837	KZA74_14495	1628.95	-0.464092	-0.436532	0.801427	0.973209	0.837046	0.031761
chromosome	rplY	3,042,635..3,042,931	297	=>	rplY, 50S ribosomal protein L25	RP-L25, rplY	ACX60_RS14225	ABUW_3098	A1S_0828	KZA74_14540	1123.58	0.893164	-0.755648	2.79146	0.973209	0.837046	3.34461e-05
chromosome	ribB	3,046,860..3,047,519	660	=>	ribB, 3,4-dihydroxy-2-butanone-4-phosphate synthase	ribB, RIB3	ACX60_RS14250	ABUW_3103	A1S_0823	KZA74_14565	922.991	-0.292134	-0.530165	1.59215	0.973209	0.837046	6.87636e-05
chromosome	fabG	3,050,155..3,050,889	735	<=	fabG, 3-oxoacyl-ACP reductase FabG	fabG	ACX60_RS14275	ABUW_3108	A1S_0818	KZA74_14590	3146.04	-0.734797	-0.874858	0.802371	0.973209	0.837046	0.34533
chromosome	fabD	3,050,886..3,051,872	987	<=	fabD, ACP S-malonyltransferase	fabD	ACX60_RS14280	ABUW_3109	A1S_0817	KZA74_14595	2029.4	-0.522753	-0.864988	0.788213	0.973209	0.837046	0.230884
chromosome	rluB	3,055,966..3,056,889	924	=>	rluB, 23S rRNA pseudouridine(2605) synthase RluB	rluB	ACX60_RS14315	ABUW_3116	A1S_0810	KZA74_14630	1492.58	-0.442116	-0.739691	0.711939	0.973209	0.837046	0.124665
chromosome	KZA74_14655	3,060,875..3,061,609	735	<=	alpha/beta fold hydrolase	bioH	ACX60_RS14340	ABUW_3121	A1S_0805	KZA74_14655	270.732	0.182338	0.328132	0.953829	0.973209	0.837046	0.00400969
chromosome	KZA74_14670	3,064,303..3,065,496	1194	<=	MFS transporter	NA	ACX60_RS14355	ABUW_3124	A1S_0801	KZA74_14670	1472.57	-0.184934	-0.39876	0.644228	0.973209	0.837046	0.0500339
chromosome	ffh	3,076,471..3,077,880	1410	<=	ffh, signal recognition particle protein	SRP54, ffh	ACX60_RS14400	ABUW_3134	A1S_0791	KZA74_14715	2637.63	-0.434162	-0.797847	0.019362	0.973209	0.837046	0.973334
chromosome	KZA74_14760	3,088,812..3,089,405	594	<=	LysE family transporter	NA	ACX60_RS14445	ABUW_3143	A1S_0783	KZA74_14760	417.761	0.413869	0.295068	2.26924	0.973209	0.837046	6.9511e-17
chromosome	KZA74_14765	3,089,762..3,090,328	567	=>	DUF2062 domain-containing protein	K09928	ACX60_RS14450	ABUW_3144	A1S_0782	KZA74_14765	227.574	0.596956	0.676826	2.55103	0.973209	0.837046	5.22252e-12
chromosome	apbC	3,091,377..3,092,606	1230	<=	apbC, iron-sulfur cluster carrier protein ApbC	apbC, mrp, NUBPL	ACX60_RS14460	ABUW_3146	A1S_0780	KZA74_14775	1188.29	-0.262783	-0.313188	0.736705	0.973209	0.837046	0.00750458
chromosome	KZA74_14795	3,096,081..3,096,704	624	<=	LysE family translocator	NA	ACX60_RS14480	ABUW_3150	A1S_0777	KZA74_14795	247.5	0.411807	0.438739	0.244963	0.973209	0.837046	0.538483
chromosome	KZA74_14830	3,102,835..3,104,511	1677	<=	mechanosensitive ion channel	NA	ACX60_RS14515	ABUW_3157	A1S_0771	KZA74_14830	22083.4	-1.02835	-1.24552	-1.52245	0.973209	0.837046	0.116993
chromosome	gigC	3,106,577..3,107,464	888	=>	gigC, LysR family transcriptional regulator GigC	gigC	ACX60_RS14535	ABUW_3161	A1S_0768	KZA74_14850	756.432	-0.212689	-0.323772	0.278566	0.973209	0.837046	0.177999
chromosome	nuoN	3,109,235..3,110,731	1497	<=	nuoN, NADH-quinone oxidoreductase subunit NuoN	nuoN	ACX60_RS14555	ABUW_3165	A1S_0764	KZA74_14870	6260.07	-0.619527	-0.78744	1.51844	0.973209	0.837046	0.0474045
chromosome	nuoM	3,110,734..3,112,332	1599	<=	nuoM, NADH-quinone oxidoreductase subunit M	nuoM	ACX60_RS14560	ABUW_3166	A1S_0763	KZA74_14875	5947.09	-0.674658	-0.838213	1.46811	0.973209	0.837046	0.0350765
chromosome	nuoL	3,112,334..3,114,223	1890	<=	nuoL, NADH-quinone oxidoreductase subunit L	nuoL	ACX60_RS14565	ABUW_3167	A1S_0762	KZA74_14880	6110.03	-0.772992	-0.926028	0.953468	0.973209	0.837046	0.200795
chromosome	nuoK	3,114,220..3,114,528	309	<=	nuoK, NADH-quinone oxidoreductase subunit NuoK	nuoK	ACX60_RS14570	ABUW_3168	A1S_0761	KZA74_14885	958.789	-0.728121	-1.04975	-0.00725436	0.973209	0.837046	0.993234
chromosome	nuoJ	3,114,528..3,115,046	519	<=	nuoJ, NADH-quinone oxidoreductase subunit J	nuoJ	ACX60_RS14575	ABUW_3169	A1S_0760	KZA74_14890	1665.99	-0.927721	-1.08309	0.236495	0.973209	0.837046	0.760266
chromosome	nuoI	3,115,046..3,115,588	543	<=	nuoI, NADH-quinone oxidoreductase subunit NuoI	nuoI	ACX60_RS14580	ABUW_3170	A1S_0759	KZA74_14895	2306.34	-0.695178	-1.22206	0.690326	0.973209	0.837046	0.390016
chromosome	nuoH	3,115,607..3,116,623	1017	<=	nuoH, NADH-quinone oxidoreductase subunit NuoH	nuoH	ACX60_RS14585	ABUW_3171	A1S_0758	KZA74_14900	4173.03	-0.709755	-1.11608	0.690585	0.973209	0.837046	0.365892
chromosome	nuoG	3,116,627..3,119,311	2685	<=	nuoG, NADH-quinone oxidoreductase subunit NuoG	nuoG	ACX60_RS14590	ABUW_3172	A1S_0757	KZA74_14905	11790.8	-1.14717	-1.46249	0.724839	0.973209	0.837046	0.400928
chromosome	nuoF	3,119,323..3,120,654	1332	<=	nuoF, NADH-quinone oxidoreductase subunit NuoF	nuoF	ACX60_RS14595	ABUW_3173	A1S_0756	KZA74_14910	4970.28	-0.694914	-1.24177	0.614792	0.973209	0.837046	0.46007
chromosome	nuoE	3,120,651..3,121,160	510	<=	nuoE, NADH-quinone oxidoreductase subunit NuoE	nuoE	ACX60_RS14600	ABUW_3174	A1S_0755	KZA74_14915	2086.22	-0.788621	-1.30531	0.264914	0.973209	0.837046	0.753019
chromosome	nuoC	3,121,174..3,122,961	1788	<=	nuoC, NADH-quinone oxidoreductase subunit C/D	nuoCD	ACX60_RS14605	ABUW_3175	A1S_0754	KZA74_14920	8123.28	-0.486077	-1.09774	1.05032	0.973209	0.837046	0.199987
chromosome	ndhC	3,123,729..3,124,280	552	<=	nuoA, ndhC, NADH-quinone oxidoreductase subunit A	nuoA	ACX60_RS14615	ABUW_3177	A1S_0752	KZA74_14930	1434.21	0.256995	-0.717876	1.6554	0.973209	0.837046	0.000590318
chromosome	KZA74_14935	3,124,708..3,126,129	1422	=>	diguanylate cyclase	dgc	ACX60_RS14620	ABUW_3178	A1S_0751	KZA74_14935	535.955	0.485856	0.497994	0.202971	0.973209	0.837046	0.667878
chromosome	bfmR	3,128,280..3,128,996	717	<=	bfmR, response regulator transcription factor BfmR	bfmR	ACX60_RS14635	ABUW_3181	A1S_0748	KZA74_14950	2754	-0.779869	-0.963194	-0.366751	0.973209	0.837046	0.711818
chromosome	KZA74_14990	3,145,390..3,145,701	312	<=	KZA74_14990	NA	ACX60_RS14675	ABUW_3192	NA	KZA74_14990	41.427	0.630899	1.12066	-2.9561	0.973209	0.837046	0.000251142
chromosome	KZA74_15000	3,146,316..3,147,611	1296	=>	ImmA/IrrE family metallo-endopeptidase	NA	ACX60_RS14685	NA	A1S_0740	KZA74_15000	189.998	0.446462	0.660985	-1.36213	0.973209	0.837046	0.00196095
chromosome	nadA	3,175,387..3,176,451	1065	<=	nadA, quinolinate synthase NadA	nadA	ACX60_RS14820	ABUW_3222	A1S_0713	KZA74_15135	1395.19	-0.451735	-0.571531	0.297649	0.973209	0.837046	0.471389
chromosome	fghA	3,185,478..3,186,323	846	<=	fghA, S-formylglutathione hydrolase	frmB, ESD, fghA	ACX60_RS14875	ABUW_3233	A1S_0703	KZA74_15190	586.731	-0.45418	-0.425198	0.206179	0.973209	0.837046	0.565783
chromosome	KZA74_15215	3,190,031..3,190,657	627	<=	CoA pyrophosphatase	CoaP	ACX60_RS14900	ABUW_3238	A1S_0697	KZA74_15215	433.555	-0.143232	-0.257969	0.172323	0.973209	0.837046	0.354601
chromosome	KZA74_15255	3,199,898..3,201,253	1356	=>	anthranilate synthase component I familyprotein	pabB	ACX60_RS14940	ABUW_3246	A1S_0689	KZA74_15255	208.024	0.66583	0.773006	-1.04982	0.973209	0.837046	0.0694863
chromosome	KZA74_15320	3,214,396..3,215,145	750	=>	VacJ family lipoprotein	mlaA, vacJ	ACX60_RS15005	ABUW_3259	A1S_0622	KZA74_15320	1003.57	-0.400179	-0.384124	1.99275	0.973209	0.837046	3.32357e-09
chromosome	KZA74_15335	3,216,880..3,217,704	825	=>	carbon-nitrogen hydrolase family protein	cnhP	ACX60_RS15020	ABUW_3262	A1S_0619	KZA74_15335	1495.2	-0.706921	-0.627519	0.543945	0.973209	0.837046	0.274309
chromosome	polA	3,225,554..3,228,325	2772	=>	polA, DNA polymerase I	polA	ACX60_RS15060	ABUW_3270	A1S_0612	KZA74_15375	2472.77	-0.460748	-0.460159	1.03586	0.973209	0.837046	0.00929394
chromosome	proC	3,228,976..3,229,812	837	<=	proC, pyrroline-5-carboxylate reductase	proC	ACX60_RS15070	ABUW_3272	A1S_0610	KZA74_15385	880.454	-0.271367	-0.687495	0.753083	0.973209	0.837046	0.0490099
chromosome	ppx	3,231,964..3,233,484	1521	<=	ppx, exopolyphosphatase	ppx-gppA	ACX60_RS15085	ABUW_3275	A1S_0607	KZA74_15400	1332.26	-0.313151	-0.316666	0.380352	0.973209	0.837046	0.151285
chromosome	pheS	3,239,225..3,240,205	981	<=	pheS, phenylalanine--tRNA ligase subunit alpha	FARSA, pheS	ACX60_RS15115	ABUW_3281	A1S_0601	KZA74_15435	849.626	-0.258987	-0.300374	0.501832	0.973209	0.837046	0.0167321
chromosome	rplT	3,242,577..3,242,936	360	<=	rplT, 50S ribosomal protein L20	RP-L20, MRPL20, rplT	ACX60_RS15135	ABUW_3284	A1S_0597	KZA74_15455	7392.77	0.470818	-1.31432	2.08945	0.973209	0.837046	0.0236181
chromosome	rpmI	3,242,948..3,243,142	195	<=	rpmI, 50S ribosomal protein L35	RP-L35, MRPL35, rpmI	ACX60_RS15140	ABUW_3285	NA	KZA74_15460	5439.07	0.480783	-1.16704	3.13247	0.973209	0.837046	0.000677543
chromosome	KZA74_15470	3,244,681..3,245,109	429	<=	DedA family protein	dedA	ACX60_RS15150	ABUW_3287	A1S_0595	KZA74_15470	117.661	0.575515	0.542019	-0.419707	0.973209	0.837046	0.312483
chromosome	KZA74_15500	3,251,106..3,251,375	270	<=	HPr family phosphocarrier protein	hpr, PTS-HPR.PTSO, ptsO, npr	ACX60_RS15180	ABUW_3293	A1S_0589	KZA74_15500	420.915	-0.895503	-0.7648	-0.104863	0.973209	0.837046	0.880952
chromosome	rapZ	3,251,372..3,252,223	852	<=	rapZ, RNase adapter RapZ	rapZ	ACX60_RS15185	ABUW_3294	A1S_0588	KZA74_15505	1334.2	-0.518787	-0.745956	0.835751	0.973209	0.837046	0.128591
chromosome	panB	3,253,098..3,253,907	810	<=	panB, 3-methyl-2-oxobutanoatehydroxymethyltransferase	panB	ACX60_RS15195	ABUW_3296	A1S_0585	KZA74_15515	869.449	-0.393781	-0.52489	0.586187	0.973209	0.837046	0.140893
chromosome	pcnB	3,254,432..3,255,895	1464	<=	pcnB, polynucleotide adenylyltransferase PcnB	pcnB	ACX60_RS15205	ABUW_3298	A1S_0583	KZA74_15525	1697.58	-0.466708	-0.651096	0.678858	0.973209	0.837046	0.0591098
chromosome	KZA74_15530	3,256,020..3,256,430	411	<=	ComEA family DNA-binding protein	comEA	ACX60_RS15210	ABUW_3299	A1S_0582	KZA74_15530	117.427	0.64071	0.841482	0.0286148	0.973209	0.837046	0.951022
chromosome	mazG	3,256,399..3,257,205	807	<=	mazG, nucleoside triphosphate pyrophosphohydrolase	mazG	ACX60_RS15215	ABUW_3300	A1S_0581	KZA74_15535	215.161	0.401455	0.428385	-1.429	0.973209	0.837046	0.000285469
chromosome	KZA74_15545	3,258,135..3,260,441	2307	<=	relA, bifunctional (p)ppGpp synthetase/guanosine-3',5'-bis(diphosphate) 3'-pyrophosphohydrolase	relA	ACX60_RS15225	ABUW_3302	A1S_0579	KZA74_15545	4850.03	-0.573507	-0.675376	0.637901	0.973209	0.837046	0.370359
chromosome	rlmD	3,260,472..3,261,863	1392	<=	rlmD, 23S rRNA (uracil(1939)-C(5))-methyltransferaseRlmD	rumA, rmlD	ACX60_RS15230	ABUW_3303	A1S_0577	KZA74_15550	1430.12	-0.261578	-0.320161	0.710079	0.973209	0.837046	0.0282237
chromosome	KZA74_15580	3,268,387..3,269,181	795	=>	TIM barrel protein	hyi, gip	ACX60_RS15260	ABUW_3309	A1S_0571	KZA74_15580	678.854	-0.424222	-0.393797	0.580893	0.973209	0.837046	0.0859187
chromosome	KZA74_15600	3,272,257..3,272,571	315	<=	NAD(P) transhydrogenase subunit alpha	pntA	ACX60_RS15280	ABUW_3313	A1S_0567	KZA74_15600	177.344	-0.378691	-0.708094	-1.24098	0.973209	0.837046	0.00343504
chromosome	KZA74_15605	3,272,583..3,273,710	1128	<=	Re/Si-specific NAD(P)(+) transhydrogenasesubunit alpha	pntA	ACX60_RS15285	ABUW_3314	A1S_0566	KZA74_15605	776.882	-0.405567	-0.459711	-0.407693	0.973209	0.837046	0.377539
chromosome	KZA74_15615	3,274,942..3,275,349	408	=>	RidA family protein	ridA	ACX60_RS15295	ABUW_3316	A1S_0564	KZA74_15615	76.2181	0.612965	0.659894	-2.19643	0.973209	0.837046	1.20922e-06
chromosome	KZA74_15640	3,279,554..3,279,676	123	=>	KZA74_15640	NA	NA	NA	NA	KZA74_15640	35.0042	0.870662	0.810466	-1.39336	0.973209	0.837046	0.0307969
chromosome	KZA74_15655	3,283,716..3,284,528	813	<=	TatD family hydrolase	tatD	ACX60_RS15330	ABUW_3347	A1S_0557	KZA74_15655	398.903	-0.325008	-0.447144	-0.925708	0.973209	0.837046	0.00159677
chromosome	KZA74_15690	3,291,896..3,294,721	2826	<=	vgrG, type VI secretion system tip protein VgrG	vgrG	ACX60_RS15365	NA	A1S_0550	KZA74_15690	3472.96	-0.444555	-0.4116	0.262921	0.973209	0.837046	0.536398
chromosome	KZA74_15695	3,295,100..3,295,963	864	<=	iron-containing redox enzyme family protein	NA	ACX60_RS15370	ABUW_3351	A1S_0549	KZA74_15695	920.85	-0.764856	-0.543415	-0.124795	0.973209	0.837046	0.820395
chromosome	leuS	3,304,929..3,307,553	2625	=>	leuS, leucine--tRNA ligase	LARS, leuS	ACX60_RS15410	ABUW_3359	A1S_0541	KZA74_15735	3422.54	-0.449584	-0.618122	1.42125	0.973209	0.837046	0.00205246
chromosome	KZA74_15765	3,314,031..3,314,834	804	<=	enoyl-ACP reductase	fabI	ACX60_RS15440	ABUW_3365	A1S_0534	KZA74_15765	1058.59	-0.390463	-0.619346	0.168073	0.973209	0.837046	0.759894
chromosome	KZA74_15800	3,318,945..3,319,601	657	<=	4'-phosphopantetheinyl transferase superfamilyprotein	LYS5, acpT	ACX60_RS15475	ABUW_3372	A1S_0527	KZA74_15800	179.678	0.378098	0.420361	-0.390899	0.973209	0.837046	0.308735
chromosome	bamB	3,338,046..3,339,191	1146	<=	bamB, outer membrane protein assembly factor BamB	bamB	ACX60_RS15580	ABUW_3374	A1S_0505	KZA74_15905	3230.6	-0.402307	-0.81716	1.06705	0.973209	0.837046	0.103436
chromosome	KZA74_15910	3,339,191..3,339,889	699	<=	tetratricopeptide repeat protein	NA	ACX60_RS15585	ABUW_3375	A1S_0504	KZA74_15910	1144.15	-0.333438	-0.572885	1.25219	0.973209	0.837046	0.0280754
chromosome	hisS	3,339,918..3,341,210	1293	<=	hisS, histidine--tRNA ligase	HARS, hisS	ACX60_RS15590	ABUW_3376	A1S_0503	KZA74_15915	2159.62	-0.303572	-0.642357	0.957357	0.973209	0.837046	0.0502754
chromosome	ispG	3,341,207..3,342,322	1116	<=	ispG, flavodoxin-dependent (E)-4-hydroxy-3-methylbut-2-enyl-diphosphate synthase	gcpE, ispG	ACX60_RS15595	ABUW_3377	A1S_0502	KZA74_15920	1665.74	-0.267939	-0.658189	0.181943	0.973209	0.837046	0.724372
chromosome	pilW	3,343,126..3,343,926	801	<=	pilW, type IV pilus biogenesis/stability protein PilW	pilW	ACX60_RS15605	ABUW_3379	A1S_0500	KZA74_15930	1148.73	-0.343767	-0.494571	0.638464	0.973209	0.837046	0.127435
chromosome	rlmN	3,343,942..3,345,174	1233	<=	rlmN, 23S rRNA (adenine(2503)-C(2))-methyltransferaseRlmN	rlmN	ACX60_RS15610	ABUW_3380	A1S_0499	KZA74_15935	3112.62	-0.569667	-0.944859	0.969671	0.973209	0.837046	0.113686
chromosome	iscX	3,345,842..3,346,042	201	<=	iscX, Fe-S cluster assembly protein IscX	iscX	ACX60_RS15620	ABUW_3382	A1S_0497	KZA74_15945	367.297	0.510009	-0.659308	1.04087	0.973209	0.837046	0.0615339
chromosome	KZA74_15960	3,348,155..3,350,338	2184	<=	carboxy terminal-processing peptidase	prc	ACX60_RS15635	ABUW_3385	A1S_0493	KZA74_15960	3639.04	-0.553635	-0.725691	0.0219968	0.973209	0.837046	0.973334
chromosome	KZA74_15970	3,351,876..3,352,718	843	=>	class I SAM-dependent methyltransferase	NA	ACX60_RS15645	ABUW_3387	A1S_0491	KZA74_15970	347.067	0.264049	0.308947	-0.637193	0.973209	0.837046	0.0355355
chromosome	KZA74_15980	3,354,385..3,355,650	1266	=>	glutamate-5-semialdehyde dehydrogenase, proline biosynthesis	proA	ACX60_RS15655	ABUW_3389	A1S_0489	KZA74_15980	1980.4	-0.354773	-0.509484	1.60425	0.973209	0.837046	4.31933e-10
chromosome	KZA74_15985	3,355,757..3,357,385	1629	<=	NADP-dependent glyceraldehyde-3-phosphatedehydrogenase	gapN	ACX60_RS15660	ABUW_3390	A1S_0487	KZA74_15985	4549.29	-0.786702	-0.754071	-0.0154202	0.973209	0.837046	0.983669
chromosome	KZA74_15990	3,357,558..3,358,070	513	<=	gluconokinase	E2.7.1.12, gntK, idnK	ACX60_RS15665	ABUW_3391	A1S_0486	KZA74_15990	931.004	-0.788252	-0.544464	0.431072	0.973209	0.837046	0.444793
chromosome	KZA74_15995	3,358,088..3,359,446	1359	<=	GntP family permease	TC.GNTP	ACX60_RS15670	ABUW_3392	A1S_0485	KZA74_15995	1796.68	-0.670424	-0.573602	0.457471	0.973209	0.837046	0.3444
chromosome	eda	3,359,642..3,360,262	621	<=	eda, bifunctional 4-hydroxy-2-oxoglutarate aldolase/2-dehydro-3-deoxy-phosphogluconate aldolase	eda	ACX60_RS15675	ABUW_3393	A1S_0484	KZA74_16000	1167.13	-0.755592	-0.715489	0.291865	0.973209	0.837046	0.569936
chromosome	edd	3,360,283..3,362,136	1854	<=	edd, phosphogluconate dehydratase	edd	ACX60_RS15680	ABUW_3394	A1S_0483	KZA74_16005	3556.01	-0.680545	-0.671489	0.469905	0.973209	0.837046	0.415009
chromosome	KZA74_16025	3,368,186..3,368,740	555	=>	DUF2059 domain-containing protein	NA	ACX60_RS15700	ABUW_3398	A1S_0479	KZA74_16025	170.551	0.485414	0.704986	1.39114	0.973209	0.837046	0.000434631
chromosome	KZA74_16065	3,378,907..3,380,067	1161	=>	homoserine O-acetyltransferase HTA	metX	ACX60_RS15740	ABUW_3406	A1S_0471	KZA74_16065	1078.04	-0.15308	-0.327969	0.857833	0.973209	0.837046	7.26324e-05
chromosome	KZA74_16075	3,380,657..3,381,244	588	=>	sel1 repeat family protein	sel1	ACX60_RS15750	ABUW_3408	A1S_0469	KZA74_16075	4525.79	-0.436991	-0.960354	0.149159	0.973209	0.837046	0.864545
chromosome	KZA74_16090	3,383,357..3,383,575	219	=>	tatA, Sec-independent protein translocase subunitTatA	tatA	ACX60_RS15765	ABUW_3411	A1S_0466	KZA74_16090	47.1054	0.688157	0.818448	-0.243749	0.973209	0.837046	0.695152
chromosome	tatC	3,384,021..3,384,791	771	=>	tatC, twin-arginine translocase subunit TatC	tatC	ACX60_RS15775	ABUW_3413	A1S_0464	KZA74_16100	201.78	0.566859	0.727056	-1.42429	0.973209	0.837046	0.014525
chromosome	KZA74_16130	3,391,865..3,392,227	363	=>	KZA74_16130	NA	ACX60_RS15805	ABUW_3419	NA	KZA74_16130	168.164	0.632869	0.522166	-0.772211	0.973209	0.837046	0.114788
chromosome	KZA74_16155	3,395,499..3,395,903	405	<=	exbD, biopolymer transporter ExbD	exbD	ACX60_RS15830	ABUW_3424	A1S_0454	KZA74_16155	1026.33	-0.449362	-0.654754	1.85544	0.973209	0.837046	0.00100775
chromosome	KZA74_16160	3,395,903..3,396,523	621	<=	MotA/TolQ/ExbB proton channel family protein	exbB	ACX60_RS15835	ABUW_3425	A1S_0453	KZA74_16160	2082.91	-0.529909	-0.800142	2.42722	0.973209	0.837046	8.60153e-05
chromosome	KZA74_16205	3,403,763..3,404,266	504	<=	KZA74_16205	NA	ACX60_RS15880	ABUW_3434	A1S_0444	KZA74_16205	1166.06	-0.555021	-0.663028	0.627578	0.973209	0.837046	0.259485
chromosome	topA	3,408,523..3,411,159	2637	<=	topA, type I DNA topoisomerase	topA	ACX60_RS15910	ABUW_3440	A1S_0439	KZA74_16235	5295.4	-0.713472	-0.728681	0.61951	0.973209	0.837046	0.318261
chromosome	KZA74_16240	3,411,195..3,411,644	450	<=	ammonium transporter	NA	ACX60_RS15915	ABUW_3441	A1S_0438	KZA74_16240	739.527	-0.273557	-0.500815	0.632967	0.973209	0.837046	0.168959
chromosome	KZA74_16255	3,413,327..3,413,572	246	<=	SlyX family protein	slyX	ACX60_RS15930	ABUW_3444	A1S_0434	KZA74_16255	149.025	-0.267125	0.342943	1.4739	0.973209	0.837046	5.19172e-07
chromosome	KZA74_16285	3,420,753..3,421,874	1122	<=	endonuclease/exonuclease/phosphatase familyprotein	NA	ACX60_RS15960	ABUW_3450	A1S_0428	KZA74_16285	601.192	0.202752	0.249013	-0.148759	0.973209	0.837046	0.590509
chromosome	KZA74_16325	3,429,423..3,429,791	369	<=	DUF1311 domain-containing protein	NA	ACX60_RS16000	ABUW_3458	NA	KZA74_16325	180.361	-0.523241	-0.594588	-1.52722	0.973209	0.837046	0.000756013
chromosome	katG	3,440,008..3,442,164	2157	=>	ptsP, phosphoenolpyruvate--protein phosphotransferase	ptsP, PTS-EI.PTSP	ACX60_RS16050	ABUW_3468	A1S_0413	KZA74_16375	2450.76	-0.328134	-0.392836	0.14029	0.973209	0.837046	0.734436
chromosome	KZA74_16380	ND	ND	ND	katG, catalase/peroxidase HPI	katG	ACX60_RS16055	ABUW_3469	A1S_0412	KZA74_16380	4344	-0.351776	-0.706258	0.299582	0.973209	0.837046	0.663877
chromosome	KZA74_16410	3,447,344..3,448,018	675	<=	HAD-IA family hydrolase	gph	ACX60_RS16085	ABUW_3475	A1S_0406	KZA74_16410	494.517	-0.248937	-0.564146	0.0767824	0.973209	0.837046	0.796833
chromosome	KZA74_16415	3,448,015..3,448,947	933	<=	RluA family pseudouridine synthase	rluC	ACX60_RS16090	ABUW_3476	A1S_0404	KZA74_16415	864.33	-0.193925	-0.407791	0.106475	0.973209	0.837046	0.720908
chromosome	KZA74_16420	3,449,670..3,453,002	3333	=>	Rne/Rng family ribonuclease	rne	ACX60_RS16095	ABUW_3478	A1S_0403	KZA74_16420	4617.76	-0.321593	-0.577804	1.36793	0.973209	0.837046	0.00475946
chromosome	KZA74_16485	3,465,164..3,465,496	333	=>	HopJ type III effector protein	hopJ	ACX60_RS16160	ABUW_3491	A1S_0390	KZA74_16485	333.212	-0.544271	-0.617908	1.99096	0.973209	0.837046	1.23657e-10
chromosome	crcB	3,465,999..3,466,379	381	<=	crcB, fluoride efflux transporter CrcB	crcB, FEX	ACX60_RS16165	ABUW_3492	A1S_0389	KZA74_16490	285.887	0.452271	0.443207	-2.13953	0.973209	0.837046	4.04249e-10
chromosome	KZA74_16515	3,469,215..3,469,859	645	<=	MBL fold metallo-hydrolase	NA	ACX60_RS16190	ABUW_3497	A1S_0383	KZA74_16515	820.747	-0.166476	-0.367654	0.421264	0.973209	0.837046	0.212437
chromosome	hemH	3,469,883..3,470,899	1017	<=	hemH, ferrochelatase	hemH, FECH	ACX60_RS16195	ABUW_3498	A1S_0382	KZA74_16520	613.438	-0.390324	-0.502599	0.164294	0.973209	0.837046	0.596075
chromosome	KZA74_16530	ND	ND	ND	murI, glutamate racemase	murI	ACX60_RS16205	ABUW_3500	A1S_0380	KZA74_16530	535.412	-0.311189	-0.353151	0.134475	0.973209	0.837046	0.556045
chromosome	KZA74_16555	3,476,576..3,477,415	840	=>	CBS domain-containing protein	corC	ACX60_RS16230	ABUW_3505	A1S_0375	KZA74_16555	783.231	-0.434431	-0.515773	0.296404	0.973209	0.837046	0.41807
chromosome	lnt	3,477,412..3,478,971	1560	=>	lnt, apolipoprotein N-acyltransferase	lnt	ACX60_RS16235	ABUW_3506	A1S_0373	KZA74_16560	1130.85	-0.300655	-0.427974	0.253584	0.973209	0.837046	0.331214
chromosome	KZA74_16590	3,484,331..3,486,172	1842	=>	monovalent cation:proton antiporter-2 (CPA2)family protein	kefB	ACX60_RS16265	ABUW_3512	A1S_0367	KZA74_16590	1037.76	-0.28469	-0.308606	0.0232006	0.973209	0.837046	0.944639
chromosome	KZA74_16600	3,487,351..3,487,962	612	=>	LysE family translocator	NA	ACX60_RS16275	ABUW_3514	A1S_0365	KZA74_16600	184.611	0.471389	0.68746	-1.57019	0.973209	0.837046	0.00068237
chromosome	KZA74_16610	3,489,081..3,489,410	330	=>	cbpM, chaperone modulator CbpM	cbpM	ACX60_RS16285	ABUW_3516	A1S_0363	KZA74_16610	821.914	-0.341322	-0.755403	-0.500589	0.973209	0.837046	0.390836
chromosome	pnp	3,490,953..3,493,040	2088	<=	pnp, polyribonucleotide nucleotidyltransferase	pnp, PNPT1	ACX60_RS16295	ABUW_3518	A1S_0361	KZA74_16620	9274.82	-0.688239	-1.07732	2.11701	0.973209	0.837046	0.00394508
chromosome	KZA74_16640	3,497,655..3,501,353	3699	<=	recB, UvrD-helicase domain-containing protein	recB	ACX60_RS16315	ABUW_3522	A1S_0356	KZA74_16640	2186.51	-0.278099	-0.312534	-0.185731	0.973209	0.837046	0.56273
chromosome	KZA74_16655	3,505,693..3,507,111	1419	<=	polyphosphate--AMP phosphotransferase	ppaP	ACX60_RS16330	ABUW_3525	A1S_0352	KZA74_16655	853.16	-0.29564	-0.238536	-0.715256	0.973209	0.837046	0.00146723
chromosome	KZA74_16670	3,509,134..3,509,802	669	=>	KZA74_16670	ubiJ	ACX60_RS16345	ABUW_3528	A1S_0349	KZA74_16670	627.957	-0.42886	-0.422231	1.028	0.973209	0.837046	0.00205075
chromosome	KZA74_16675	3,509,815..3,511,434	1620	=>	2-octaprenylphenol hydroxylase	ubiB, aarF	ACX60_RS16350	ABUW_3529	A1S_0348	KZA74_16675	1381.25	-0.536852	-0.393049	1.01229	0.973209	0.837046	0.0050974
chromosome	KZA74_16685	3,513,026..3,513,799	774	=>	bifunctional phosphoribosyl-AMP cyclohydrolase/phosphoribosyl-ATP diphosphatase HisIE	hisIE	ACX60_RS16360	ABUW_3531	A1S_0346	KZA74_16685	1040.47	-0.374928	-0.314436	1.22642	0.973209	0.837046	1.00536e-05
chromosome	KZA74_16710	3,520,246..3,522,057	1812	=>	monovalent cation/H+ antiporter subunit D	phaD	ACX60_RS16385	ABUW_3536	A1S_0341	KZA74_16710	1719.45	-0.219657	-0.397637	1.27255	0.973209	0.837046	0.000207001
chromosome	KZA74_16715	3,522,060..3,522,587	528	=>	Na+/H+ antiporter subunit E	phaE	ACX60_RS16390	ABUW_3537	A1S_0340	KZA74_16715	321.473	-0.238904	-0.321257	1.20892	0.973209	0.837046	4.30959e-05
chromosome	KZA74_16720	3,522,584..3,522,859	276	=>	monovalent cation/H+ antiporter subunit F	phaF	ACX60_RS16395	ABUW_3538	NA	KZA74_16720	133.137	-0.600707	-0.529855	0.966295	0.973209	0.837046	0.00922039
chromosome	nusA	3,526,444..3,527,928	1485	<=	nusA, transcription termination factor NusA	nusA	ACX60_RS16415	ABUW_3542	A1S_0335	KZA74_16740	6249.48	-0.612304	-1.37123	1.58897	0.973209	0.837046	0.0416247
chromosome	rimP	3,527,966..3,528,490	525	<=	rimP, ribosome maturation factor RimP	rimP	ACX60_RS16420	ABUW_3543	A1S_0334	KZA74_16745	1444.22	-0.385223	-1.15323	1.68152	0.973209	0.837046	0.00141161
chromosome	secG	3,529,132..3,529,461	330	<=	secG, preprotein translocase subunit SecG	secG	ACX60_RS16435	ABUW_3547	A1S_0331	KZA74_16765	748.201	-0.308465	-0.64252	0.689267	0.973209	0.837046	0.168948
chromosome	tpiA	3,529,474..3,530,268	795	<=	tpiA, triose-phosphate isomerase	TPI, tpiA	ACX60_RS16440	ABUW_3548	A1S_0330	KZA74_16770	1181.74	-0.510059	-0.72357	0.763726	0.973209	0.837046	0.0845444
chromosome	KZA74_16820	3,540,408..3,540,962	555	=>	YqgE/AlgH family protein	algH, yqgE	ACX60_RS16490	ABUW_3558	A1S_0320	KZA74_16820	1344.62	-0.575504	-0.734339	1.40849	0.973209	0.837046	0.00866978
chromosome	ruvX	3,540,962..3,541,402	441	=>	ruvX, Holliday junction resolvase RuvX	ruvX	ACX60_RS16495	ABUW_3559	A1S_0319	KZA74_16825	974.293	-0.826369	-0.80165	0.684618	0.973209	0.837046	0.236623
chromosome	pgsA	3,547,848..3,548,435	588	<=	pgsA, CDP-diacylglycerol--glycerol-3-phosphate 3-phosphatidyltransferase	pgsA, PGS1	ACX60_RS16530	ABUW_3566	A1S_0312	KZA74_16860	882.193	-0.568994	-0.524522	0.175329	0.973209	0.837046	0.665835
chromosome	KZA74_16905	3,560,779..3,561,495	717	=>	KZA74_16905	NA	ACX60_RS16575	NA	A1S_0302	KZA74_16905	124.659	0.448144	0.693717	-0.698298	0.973209	0.837046	0.144152
chromosome	KZA74_16915	3,562,281..3,562,646	366	=>	MerR family transcriptional regulator	merR	ACX60_RS16585	ABUW_3576	A1S_0300	KZA74_16915	97.6	0.741479	0.658288	0.418631	0.973209	0.837046	0.439979
chromosome	KZA74_16920	3,562,668..3,563,426	759	<=	KZA74_16920	NA	ACX60_RS16590	ABUW_3577	A1S_0299	KZA74_16920	205.236	0.225365	0.350233	-1.47569	0.973209	0.837046	8.9258e-07
chromosome	KZA74_16935	3,565,928..3,566,830	903	=>	selenocysteine synthase	NA	ACX60_RS16605	ABUW_3580	A1S_0296	KZA74_16935	174.324	0.496675	0.590648	-3.21353	0.973209	0.837046	3.83116e-09
chromosome	htpG	3,566,914..3,568,833	1920	<=	htpG, molecular chaperone HtpG	HSP90A, htpG	ACX60_RS16610	ABUW_3581	A1S_0294	KZA74_16940	2723.06	-0.895055	-0.997109	0.610283	0.973209	0.837046	0.415403
chromosome	KZA74_16965	3,572,904..3,573,401	498	=>	DUF4442 domain-containing protein	NA	ACX60_RS16635	ABUW_3586	A1S_0289	KZA74_16965	245.352	0.434015	0.654965	0.565849	0.973209	0.837046	0.0711476
chromosome	rpoC	3,574,532..3,578,725	4194	<=	rpoC, DNA-directed RNA polymerase subunit beta'	rpoC	ACX60_RS16650	ABUW_3589	A1S_0288	KZA74_16980	35730.3	-0.571967	-1.31622	1.58213	0.973209	0.837046	0.0723452
chromosome	rpoB	3,578,812..3,582,900	4089	<=	rpoB, DNA-directed RNA polymerase subunit beta	rpoB	ACX60_RS16655	ABUW_3590	A1S_0287	KZA74_16985	23330.1	-0.486775	-1.29333	1.69934	0.973209	0.837046	0.0405268
chromosome	KZA74_17115	3,601,588..3,602,727	1140	<=	histidine kinase	algZ	ACX60_RS16785	ABUW_3616	A1S_0260	KZA74_17115	359.256	0.423637	0.678201	-0.156274	0.973209	0.837046	0.711378
chromosome	KZA74_17125	3,604,161..3,604,430	270	=>	oxidative damage protection protein	odpp	ACX60_RS16795	ABUW_3618	A1S_0257	KZA74_17125	201.152	-0.578455	-0.545004	0.793233	0.973209	0.837046	0.0480798
chromosome	phoU	3,604,746..3,605,468	723	<=	phoU, phosphate signaling complex protein PhoU	phoU	ACX60_RS16800	ABUW_3619	A1S_0256	KZA74_17130	545.448	-0.211271	-0.306138	0.835509	0.973209	0.837046	0.0041077
chromosome	KZA74_17150	3,608,594..3,609,673	1080	=>	KZA74_17150	NA	ACX60_RS16820	ABUW_3623	A1S_0252	KZA74_17150	274.606	0.502393	0.609421	-0.721005	0.973209	0.837046	0.152446
chromosome	KZA74_17195	3,618,111..3,619,964	1854	<=	feoB, ferrous iron transporter B	feoB	ACX60_RS16865	ABUW_3632	A1S_0243	KZA74_17195	2275.61	-0.384425	-0.524844	1.15357	0.973209	0.837046	0.00901881
chromosome	KZA74_17265	3,635,210..3,636,658	1449	=>	leucyl aminopeptidase	CARP, pepA	ACX60_RS16935	ABUW_3646	A1S_0227	KZA74_17265	2740.93	-0.502799	-0.833278	0.671487	0.973209	0.837046	0.256736
chromosome	KZA74_17275	3,637,097..3,637,735	639	=>	KZA74_17275	blhA	ACX60_RS16945	ABUW_3648	A1S_0225	KZA74_17275	474.315	-0.339754	-0.429854	0.0882831	0.973209	0.837046	0.815551
chromosome	KZA74_17290	3,638,845..3,640,137	1293	<=	DNA adenine methylase	K07318	ACX60_RS16960	ABUW_3651	A1S_0222	KZA74_17290	2230.95	-0.445634	-0.454754	1.44166	0.973209	0.837046	0.000629293
chromosome	glnK	3,643,307..3,643,645	339	<=	glnK, P-II family nitrogen regulator	glnK	ACX60_RS16980	ABUW_3655	A1S_0218	KZA74_17310	1588.5	-0.464702	-0.989152	0.390011	0.973209	0.837046	0.628234
chromosome	KZA74_17330	3,647,249..3,648,736	1488	=>	SulP family inorganic anion transporter	sulP, TC.SULP	ACX60_RS17000	NA	A1S_0215	KZA74_17330	1.96922	2.98966	3.21783	1.03806	0.973209	0.837046	0.611993
chromosome	KZA74_17355	3,652,209..3,653,324	1116	<=	TniQ family protein	tniQ	ACX60_RS17020	NA	A1S_0213	KZA74_17355	0.942453	3.00791	3.57125	-0.051476	0.973209	0.837046	0.984136
chromosome	KZA74_17365	3,654,279..3,656,189	1911	<=	DDE-type integrase/transposase/recombinase	integrase	ACX60_RS17030	ABUW_3676	A1S_0211	KZA74_17365	0.792061	1.91249	2.70216	2.81681	0.973209	0.837046	0.250608
chromosome	parC	3,668,774..3,670,993	2220	<=	parC, DNA topoisomerase IV subunit A	parC	ACX60_RS17100	ABUW_3690	A1S_0194	KZA74_17435	2088.15	0.419249	-0.397191	0.217545	0.973209	0.837046	0.578504
chromosome	KZA74_17445	3,672,549..3,673,193	645	<=	trimeric intracellular cation channel familyprotein	NA	ACX60_RS17110	ABUW_3692	A1S_0192	KZA74_17445	346.648	0.206875	0.455648	-0.782316	0.973209	0.837046	0.0595812
chromosome	KZA74_17490	3,681,436..3,683,814	2379	<=	YgiQ family radical SAM protein	ygiQ	ACX60_RS17155	ABUW_3703	A1S_0183	KZA74_17490	2737.83	-0.420601	-0.561788	1.36163	0.973209	0.837046	0.00640483
chromosome	KZA74_17495	3,684,029..3,685,288	1260	<=	esterase-like activity of phytase familyprotein	NA	ACX60_RS17160	ABUW_3704	A1S_0182	KZA74_17495	221.678	0.41567	0.613897	-2.48205	0.973209	0.837046	1.70899e-05
chromosome	KZA74_17505	3,685,922..3,686,407	486	=>	DUF2938 domain-containing protein	NA	ACX60_RS17170	ABUW_3706	A1S_0180	KZA74_17505	129.24	0.674623	0.862173	-4.16293	0.973209	0.837046	8.60709e-09
chromosome	KZA74_17530	ND	ND	ND	rrf, 5S ribosomal RNA	rrf	NA	NA	A1S_r	KZA74_17530	20.8355	0.613203	1.19448	-7.48754	0.973209	0.837046	6.77552e-07
chromosome	KZA74_17555	3,695,688..3,696,284	597	<=	TetR/AcrR family transcriptional regulator	tetR	ACX60_RS17220	ABUW_3716	A1S_0173	KZA74_17555	73.4631	0.251446	0.599498	-1.52171	0.973209	0.837046	0.000779278
chromosome	KZA74_17560	3,696,372..3,697,586	1215	=>	DUF2236 domain-containing protein	NA	ACX60_RS17225	ABUW_3717	A1S_0172	KZA74_17560	374.016	0.643428	0.447082	-0.300101	0.973209	0.837046	0.528901
chromosome	KZA74_17615	3,707,548..3,708,312	765	=>	AraC family transcriptional regulator	araC	ACX60_RS17280	ABUW_3728	A1S_0160	KZA74_17615	282.748	0.40564	0.395149	-1.00785	0.973209	0.837046	0.00118317
chromosome	KZA74_17630	3,709,774..3,710,256	483	<=	DUF2846 domain-containing protein	NA	ACX60_RS17295	NA	A1S_0157	KZA74_17630	372.761	-0.829607	-0.981603	1.22741	0.973209	0.837046	0.0435154
chromosome	KZA74_17655	3,714,805..3,715,341	537	<=	atp , F0F1 ATP synthase subunit delta	ATPF1D, atpH	ACX60_RS17320	ABUW_3735	A1S_0152	KZA74_17655	4024.55	-0.792533	-1.71769	0.897858	0.973209	0.837046	0.382516
chromosome	KZA74_17660	3,715,354..3,715,824	471	<=	atp , F0F1 ATP synthase subunit B	ATPF0B, atpF	ACX60_RS17325	ABUW_3736	A1S_0151	KZA74_17660	3792.05	-0.636621	-1.64775	1.02102	0.973209	0.837046	0.300989
chromosome	KZA74_17705	3,721,566..3,722,486	921	=>	Dyp-type peroxidase	K07223, dyp	ACX60_RS17370	ABUW_3745	A1S_0141	KZA74_17705	1683.77	-0.441477	-0.671175	0.924923	0.973209	0.837046	0.0534948
chromosome	KZA74_17730	3,728,120..3,728,527	408	<=	OsmC family protein	yhfA, osmC	ACX60_RS17395	ABUW_3750	A1S_0135	KZA74_17730	421.615	-0.356098	-0.611076	-0.221268	0.973209	0.837046	0.654509
chromosome	KZA74_17735	3,728,524..3,729,471	948	<=	pirin family protein	K06911, pirin	ACX60_RS17400	ABUW_3751	A1S_0134	KZA74_17735	1264.44	-0.376168	-0.56994	-0.0431302	0.973209	0.837046	0.931046
chromosome	KZA74_17740	3,729,628..3,729,933	306	<=	DUF3861 domain-containing protein	NA	ACX60_RS17405	ABUW_3752	A1S_0133	KZA74_17740	118.503	0.40894	0.362806	0.278816	0.973209	0.837046	0.338753
chromosome	KZA74_17750	3,730,740..3,731,528	789	<=	aminoglycoside nucleotidyltransferaseANT(3'')-IIa	NA	ACX60_RS17415	ABUW_3754	A1S_0131	KZA74_17750	248.898	0.237702	0.412054	0.104906	0.973209	0.837046	0.776428
chromosome	KZA74_17960	3,779,785..3,780,486	702	<=	DUF1003 domain-containing protein	NA	ACX60_RS17625	ABUW_3796	A1S_0088	KZA74_17960	185.749	0.286799	0.627621	-1.05228	0.973209	0.837046	0.00653142
chromosome	KZA74_17990	3,783,879..3,784,709	831	<=	triacylglycerol lipase	lipase	ACX60_RS17655	NA	A1S_0086	KZA74_17990	197.196	0.386719	0.54603	-1.60647	0.973209	0.837046	1.85179e-06
chromosome	KZA74_18015	3,790,982..3,791,491	510	<=	GNAT family N-acetyltransferase	GNAT	ACX60_RS17675	NA	A1S_0079	KZA74_18015	161.515	0.656307	0.663858	-1.57187	0.973209	0.837046	0.000369976
chromosome	KZA74_18085	3,808,995..3,810,365	1371	=>	phosphomannomutase/phosphoglucomutase	pgm	ACX60_RS17735	ABUW_3815	A1S_0066	KZA74_18085	1112.09	-0.177556	-0.488177	0.606827	0.973209	0.837046	0.0611576
chromosome	KZA74_18170	3,827,757..3,828,857	1101	=>	outer membrane protein	wza	ACX60_RS17820	ABUW_3831	A1S_0051	KZA74_18170	1714.58	-0.341885	-0.752457	1.4436	0.973209	0.837046	0.0108125
chromosome	KZA74_18175	3,828,862..3,829,290	429	=>	low molecular weight phosphotyrosine proteinphosphatase	wzb	ACX60_RS17825	ABUW_3832	A1S_0050	KZA74_18175	443.629	-0.322312	-0.431309	1.3392	0.973209	0.837046	0.00047858
chromosome	murJ	3,833,203..3,834,753	1551	<=	murJ, murein biosynthesis integral membrane proteinMurJ	murJ, mviN	ACX60_RS17845	ABUW_3836	A1S_0046	KZA74_18195	1032.47	-0.276105	-0.329576	-0.0852004	0.973209	0.837046	0.722766
chromosome	KZA74_18235	3,841,487..3,842,512	1026	<=	ferredoxin reductase	ferr-reductase	ACX60_RS17880	ABUW_3843	A1S_0040	KZA74_18235	1531.33	-0.735671	-0.499585	1.23879	0.973209	0.837046	0.00973476
chromosome	KZA74_18240	3,842,686..3,843,324	639	=>	TetR family transcriptional regulator	tetR	ACX60_RS17885	ABUW_3844	A1S_0039	KZA74_18240	544.185	-0.460341	-0.354525	0.779679	0.973209	0.837046	0.0057721
chromosome	KZA74_18255	3,844,983..3,845,696	714	=>	bifunctional 3-demethylubiquinone 3-O-methyltransferase/2-octaprenyl-6-hydroxy phenol methylase	ubiG	ACX60_RS17900	ABUW_3847	A1S_0036	KZA74_18255	718.613	-0.348303	-0.446265	0.127899	0.973209	0.837046	0.748809
chromosome	KZA74_18260	3,845,693..3,846,394	702	=>	HAD-IA family hydrolase	mupP	ACX60_RS17905	ABUW_3848	A1S_0035	KZA74_18260	557.74	-0.593588	-0.668279	0.642588	0.973209	0.837046	0.103951
chromosome	KZA74_18265	3,846,460..3,847,206	747	=>	YciK family oxidoreductase	yciK	ACX60_RS17910	ABUW_3849	A1S_0034	KZA74_18265	1707.05	0.509284	-0.647652	0.0246407	0.973209	0.837046	0.973928
chromosome	ribF	3,857,925..3,858,926	1002	=>	ribF, bifunctional riboflavin kinase/FAD synthetase	ribF	ACX60_RS17970	ABUW_3861	A1S_0021	KZA74_18325	964.618	-0.235607	-0.432619	0.857418	0.973209	0.837046	0.00556271
chromosome	ileS	3,858,988..3,861,825	2838	=>	ileS, isoleucine--tRNA ligase	IARS, ileS	ACX60_RS17975	ABUW_3862	A1S_0020	KZA74_18330	4230.2	-0.325647	-0.868551	0.867895	0.973209	0.837046	0.136536
chromosome	KZA74_18350	3,863,555..3,863,905	351	<=	ankyrin repeat domain-containing protein	ankyrin	ACX60_RS17995	ABUW_3866	NA	KZA74_18350	131.806	0.57109	0.816662	0.307865	0.973209	0.837046	0.59215
chromosome	dnaK	3,875,597..3,877,537	1941	=>	dnaK, molecular chaperone DnaK	dnaK, HSPA9	ACX60_RS18060	ABUW_3879	A1S_2960	KZA74_18415	26586.5	-0.856431	-1.24913	0.988297	0.973209	0.837046	0.374578
chromosome	KZA74_18420	3,877,868..3,878,785	918	=>	matrixin family metalloprotease	matrixin	ACX60_RS18065	ABUW_3880	A1S_3866	KZA74_18420	91.0765	0.371997	0.733377	-1.57291	0.973209	0.837046	0.00439791
chromosome	KZA74_18425	3,878,972..3,879,877	906	=>	matrixin family metalloprotease	matrixin	ACX60_RS18070	ABUW_3881	A1S_3867	KZA74_18425	272.206	0.339484	0.683819	1.85974	0.973209	0.837046	4.95481e-09
chromosome	KZA74_18440	3,882,396..3,883,517	1122	<=	5-(carboxyamino)imidazole ribonucleotidesynthase	purK	ACX60_RS18085	ABUW_3885	A1S_2963	KZA74_18440	1765.03	0.531025	-0.545398	1.24785	0.973209	0.837046	0.0098335
chromosome	hpt	3,894,204..3,894,731	528	=>	hpt, hypoxanthine phosphoribosyltransferase	hprT, hpt, HPRT1	ACX60_RS18145	ABUW_3897	A1S_2974	KZA74_18495	550.856	0.323384	-0.422644	0.902729	0.973209	0.837046	0.0333162
pAB3	KZA74_18645	14,748..14,873	126	<=	DDE-type integrase/transposase/recombinase	NA	NA	NA	NA	KZA74_18645	7787.41	-0.682708	-0.979932	0.676658	0.973209	0.837046	0.461521
pAB3	KZA74_18650	14,878..16,788	1911	<=	heteromeric transposase endonuclease subunitTnsA	NA	NA	NA	NA	KZA74_18650	3487.09	-0.47092	-0.873774	1.7973	0.973209	0.837046	0.0368112
pAB3	KZA74_18765	37,340..39,454	2115	<=	M48 family metallopeptidase	NA	NA	NA	A1S_0624	KZA74_18765	320.502	0.279555	-0.987448	0.262588	0.973209	0.837046	0.664955
pAB3	KZA74_19100	108,358..109,989	1632	=>	Basic leucine zipper (bZIP) domain of bZIPtranscription factors: a DNA-binding and dimerization domain; Region: bZIP; cl21462	NA	NA	NA	A1S_3541	KZA74_19100	592.105	-0.384663	-0.841321	0.981434	0.973209	0.837046	0.079801
pAB3	KZA74_19240	135,765..136,169	405	<=	KZA74_19240	NA	NA	NA	A1S_3557	KZA74_19240	421.037	0.281103	0.5224	0.766788	0.973209	0.837046	0.0350555
pAB1	repM	9967..10,923	957	=>	repM	NA	NA	NA	NA	KZA74_19360	1227.62	0.707754	1.06269	0.885818	0.973209	0.837046	0.0728554
pAB1	KZA74_19365	10,916..11,470	555	=>	plasmid replication DNA-binding protein	NA	NA	NA	NA	KZA74_19365	721.207	0.377491	1.02965	0.462993	0.973209	0.837046	0.404517
pAB1	KZA74_19375	11,817..12,206	390	<=	tautomerase family protein	NA	NA	NA	NA	KZA74_19375	381.492	0.46822	0.970964	0.849946	0.973209	0.837046	0.139564
pAB2	repM	1..951	951	=>	repM	NA	NA	NA	NA	KZA74_19385	1517.78	0.467525	0.591985	-0.72851	0.973209	0.837046	0.101031
pAB2	znuD2	6197..8608	2412	=>	znuD2 , TonB-dependent receptor ZnuD2	NA	NA	NA	NA	KZA74_19435	4449.64	0.294964	0.512055	-0.182065	0.973209	0.837046	0.693418
pAB2	KZA74_19445	9525..9722	198	<=	KZA74_19445	NA	NA	NA	NA	KZA74_19445	539.901	0.17599	0.616975	-1.62221	0.973209	0.837046	1.61881e-09
chromosome	KZA74_03300	679,566..680,636	1071	=>	OmpA family protein	TC.OOP	ACX60_RS03295	ABUW_0649	A1S_2840	KZA74_03300	85534	-0.49755	-1.30264	0.18184	0.973457	0.837046	0.870557
chromosome	gatB	741,711..743,180	1470	<=	gatB, Asp-tRNA(Asn)/Glu-tRNA(Gln) amidotransferasesubunit GatB	gatB, PET112	ACX60_RS03590	ABUW_0712	A1S_2784	KZA74_03600	2373.86	-0.253033	-0.745456	0.864066	0.973457	0.837046	0.0952598
chromosome	rpmD	449,340..449,516	177	=>	rpmD, 50S ribosomal protein L30	RP-L30, MRPL30, rpmD	ACX60_RS02185	ABUW_0424	NA	KZA74_02185	1589.95	-0.490041	-1.60498	1.63531	0.974056	0.837046	0.109983
chromosome	KZA74_09300	1,958,614..1,959,777	1164	=>	catalase family protein	katX	NA	NA	NA	KZA74_09300	232.923	0.190239	0.456479	-0.905435	0.974056	0.837046	0.0172143
chromosome	KZA74_17200	3,619,961..3,620,224	264	<=	feoA, ferrous iron transport protein A	feoA	ACX60_RS16870	ABUW_3633	A1S_0242	KZA74_17200	430.768	-0.262475	-0.530135	1.60764	0.974056	0.837046	0.00207237
chromosome	atpA	3,713,214..3,714,758	1545	<=	atpA, F0F1 ATP synthase subunit alpha	ATPF1A, atpA	ACX60_RS17315	ABUW_3734	A1S_0153	KZA74_17650	15741.8	-0.516151	-1.59487	1.30038	0.974056	0.837046	0.234289
chromosome	prpC	3,798,242..3,799,399	1158	<=	prpC, 2-methylcitrate synthase	prpC	ACX60_RS17695	ABUW_3807	A1S_0074	KZA74_18040	2185.21	-0.335807	-0.918367	-1.14661	0.974111	0.837046	0.103219
chromosome	atpB	3,716,193..3,717,068	876	<=	atpB, F0F1 ATP synthase subunit A	ATPF0A, atpB	ACX60_RS17335	ABUW_3738	A1S_0148	KZA74_17670	6493	-0.406869	-1.30377	1.5905	0.974934	0.837046	0.0603207
chromosome	KZA74_00045	11,034..12,041	1008	=>	RND transporter	NA	ACX60_RS00045	ABUW_0009	A1S_0009	KZA74_00045	2931.05	0.269146	-1.02586	0.175002	0.97575	0.837046	0.837106
chromosome	hppD	70,371..71,426	1056	=>	hppD, 4-hydroxyphenylpyruvate dioxygenase	HPD, hppD	ACX60_RS00325	ABUW_0066	A1S_3418	KZA74_00330	4524.88	-0.376608	-1.02769	-2.81232	0.97575	0.837046	0.00341502
chromosome	glmU	98,180..99,544	1365	<=	glmU, bifunctional UDP-N-acetylglucosamine diphosphorylase/glucosamine-1-phosphate N-acetyltransferase GlmU	glmU	ACX60_RS00445	ABUW_0090	A1S_3393	KZA74_00445	2082.24	-0.222263	-0.748028	1.22524	0.97575	0.837046	0.0128919
chromosome	KZA74_00605	134,029..134,700	672	=>	KZA74_00605	NA	ACX60_RS00620	NA	A1S_3899	KZA74_00605	70.8836	0.300656	0.769997	-0.825928	0.97575	0.837046	0.30086
chromosome	KZA74_00845	185,853..186,620	768	<=	porin	porin	ACX60_RS00865	ABUW_0166	A1S_3317	KZA74_00845	10605.8	-0.420306	-1.25903	-0.343019	0.97575	0.837046	0.734135
chromosome	KZA74_01030	229,673..231,121	1449	=>	gabD, NAD-dependent succinate-semialdehydedehydrogenase	gabD	ACX60_RS01050	ABUW_0204	A1S_3280	KZA74_01030	2493.21	-0.249314	-1.11749	-1.05368	0.97575	0.837046	0.145344
chromosome	KZA74_01125	246,998..247,414	417	<=	carboxymuconolactone decarboxylase familyprotein	cmdp	ACX60_RS01140	ABUW_0223	A1S_3263	KZA74_01125	90.7553	0.116816	0.33834	0.0910646	0.97575	0.837046	0.780573
chromosome	KZA74_01355	284,415..284,840	426	<=	copD,	copD	ACX60_RS01365	NA	A1S_3888	KZA74_01355	112.305	0.123736	0.381453	-1.00656	0.97575	0.837046	0.00123952
chromosome	ispH	343,435..344,385	951	=>	ispH, 4-hydroxy-3-methylbut-2-enyl diphosphatereductase	ispH, lytB	ACX60_RS01635	ABUW_0312	A1S_3169	KZA74_01630	1699.68	-0.172248	-0.575545	0.598374	0.97575	0.837046	0.186819
chromosome	rpsP	352,329..352,580	252	=>	rpsP, 30S ribosomal protein S16	RP-S16, MRPS16, rpsP	ACX60_RS01675	ABUW_0320	A1S_3164	KZA74_01670	3013.05	0.333682	-1.10261	2.39333	0.97575	0.837046	0.00466748
chromosome	trmD	353,194..353,934	741	=>	trmD, tRNA (guanosine(37)-N1)-methyltransferase TrmD	trmD	ACX60_RS01685	ABUW_0322	A1S_3162	KZA74_01680	6359.84	0.340384	-1.18741	2.2971	0.97575	0.837046	0.00264092
chromosome	dxs	412,760..414,664	1905	=>	dxs, 1-deoxy-D-xylulose-5-phosphate synthase	dxs	ACX60_RS01960	ABUW_0379	A1S_3106	KZA74_01955	3388.48	-0.201489	-0.5078	0.857139	0.97575	0.837046	0.0777948
chromosome	KZA74_01960	414,787..415,617	831	=>	suhB, Inositol-1-monophosphatase	suhB, E3.1.3.25, IMPA	ACX60_RS01965	ABUW_0380	A1S_3105	KZA74_01960	2223.16	-0.203422	-0.510368	1.26022	0.97575	0.837046	0.00743491
chromosome	KZA74_01975	418,278..419,096	819	=>	mlaF, putative phospholipid import ATP-binding proteinMlaF	mlaF, linL, mkl	ACX60_RS01980	ABUW_0383	A1S_3103	KZA74_01975	1843.19	-0.229626	-0.78206	1.04281	0.97575	0.837046	0.0373305
chromosome	rplW	442,451..442,771	321	=>	rplW, 50S ribosomal protein L23	RP-L23, MRPL23, rplW	ACX60_RS02105	ABUW_0408	A1S_3078	KZA74_02105	4188.34	-0.390352	-1.76485	1.62424	0.97575	0.837046	0.136536
chromosome	rpmC	445,408..445,605	198	=>	rpmC, 50S ribosomal protein L29	RP-L29, rpmC	ACX60_RS02135	ABUW_0414	A1S_3073	KZA74_02135	3065.72	-0.39514	-1.73999	2.05742	0.97575	0.837046	0.0579669
chromosome	rpsQ	445,602..445,859	258	=>	rpsQ, 30S ribosomal protein S17	RP-S17, MRPS17, rpsQ	ACX60_RS02140	ABUW_0415	A1S_3072	KZA74_02140	8002.86	-0.435223	-1.85882	1.96309	0.97575	0.837046	0.095158
chromosome	rplN	445,952..446,320	369	=>	rplN, 50S ribosomal protein L14	RP-L14, MRPL14, rplN	ACX60_RS02145	ABUW_0416	A1S_3071	KZA74_02145	6805.2	-0.359296	-1.63002	1.83796	0.97575	0.837046	0.0610731
chromosome	rplE	446,663..447,199	537	=>	rplE, 50S ribosomal protein L5	RP-L5, MRPL5, rplE	ACX60_RS02155	ABUW_0418	A1S_3069	KZA74_02155	10589.3	-0.425218	-1.54705	2.06068	0.97575	0.837046	0.0361624
chromosome	secY	450,006..451,325	1320	=>	secY, preprotein translocase subunit SecY	secY	ACX60_RS02195	ABUW_0426	A1S_3061	KZA74_02195	28508.5	-0.382384	-1.47576	1.98206	0.97575	0.837046	0.067751
chromosome	pssA	492,398..493,231	834	=>	pssA, CDP-diacylglycerol--serineO-phosphatidyltransferase	CHO1, pssA	ACX60_RS02420	ABUW_0472	A1S_3017	KZA74_02420	1254.4	-0.172883	-0.547576	0.667483	0.97575	0.837046	0.112406
chromosome	KZA74_02755	558,060..559,433	1374	<=	cusS, heavy metal sensor histidine kinase	cusS, copS, silS	ACX60_RS02755	ABUW_3324	A1S_2938	KZA74_02755	421.705	0.19353	0.43954	0.192093	0.97575	0.837046	0.691972
chromosome	aspS	620,665..622,443	1779	<=	aspS, aspartate--tRNA ligase	aspS	ACX60_RS03040	ABUW_0598	A1S_2894	KZA74_03045	4170.54	-0.301976	-0.8559	1.77566	0.97575	0.837046	0.00502614
chromosome	KZA74_03060	625,665..627,128	1464	=>	clsA, phospholipase D family protein	clsA	ACX60_RS03055	ABUW_0601	A1S_2891	KZA74_03060	1182.05	-0.179643	-0.492675	0.23434	0.97575	0.837046	0.629452
chromosome	trpA	648,863..649,666	804	=>	trpA, tryptophan synthase subunit alpha	trpA	ACX60_RS03160	ABUW_0622	A1S_2870	KZA74_03165	3236.6	-0.318873	-0.882818	0.794057	0.97575	0.837046	0.318362
chromosome	KZA74_03205	658,518..658,961	444	=>	KZA74_03205	NA	ACX60_RS03200	ABUW_0630	A1S_2861	KZA74_03205	805.841	-0.220136	-0.566298	1.11091	0.97575	0.837046	0.0327632
chromosome	KZA74_03365	693,651..694,760	1110	=>	NADH:flavin oxidoreductase/NADH oxidase	NA	ACX60_RS03360	ABUW_0662	A1S_2828	KZA74_03365	1123.89	-0.206601	-0.738359	0.0152148	0.97575	0.837046	0.975141
chromosome	adeK	790,436..791,890	1455	<=	adeK, multidrug efflux RND transporter outer membranechannel subunit AdeK	adeK	ACX60_RS03825	ABUW_0842|ABUW_1976	A1S_2737	KZA74_03835	5816.31	-0.357588	-1.03754	0.372423	0.97575	0.837046	0.684387
chromosome	lpdA	828,579..830,012	1434	=>	lpdA, dihydrolipoyl dehydrogenase	DLD, lpd, pdhD	ACX60_RS03995	ABUW_0874	A1S_2717	KZA74_04015	7563.32	-0.400332	-1.08117	0.970146	0.97575	0.837046	0.279352
chromosome	carA	858,288..859,427	1140	<=	carA, glutamine-hydrolyzing carbamoyl-phosphatesynthase small subunit	carA, CPA1	ACX60_RS04085	ABUW_0894	A1S_2686	KZA74_04105	3963.66	-0.285343	-0.980931	1.94152	0.97575	0.837046	0.00505745
chromosome	KZA74_04265	892,283..892,666	384	=>	SCP2 sterol-binding domain-containing protein	scp2	ACX60_RS04245	ABUW_0927	A1S_2655	KZA74_04265	1058.41	-0.321752	-0.811643	1.22272	0.97575	0.837046	0.106104
chromosome	KZA74_04315	902,752..903,192	441	<=	HIT domain-containing protein	NA	ACX60_RS04295	NA	NA	KZA74_04315	112.831	0.175358	0.505901	0.323394	0.97575	0.837046	0.401626
chromosome	KZA74_04320	903,192..904,049	858	<=	KZA74_04320	NA	ACX60_RS04300	NA	A1S_2649	KZA74_04320	189.441	0.166163	0.583007	-0.69617	0.97575	0.837046	0.0728554
chromosome	KZA74_04375	912,606..915,014	2409	=>	FdhF/YdeP family oxidoreductase	NA	ACX60_RS04355	ABUW_0944	A1S_2640	KZA74_04375	4521.24	-0.241632	-0.73839	-0.670561	0.97575	0.837046	0.335998
chromosome	KZA74_04560	955,164..956,357	1194	=>	AI-2E family transporter	NA	ACX60_RS04535	ABUW_0982	A1S_2604	KZA74_04560	2575.34	-0.219866	-0.653836	0.704423	0.97575	0.837046	0.235603
chromosome	KZA74_04805	1,018,405..1,019,091	687	<=	transposase	NA	ACX60_RS04790	NA	A1S_2555	KZA74_04805	116.364	0.216226	0.517972	-1.20558	0.97575	0.837046	0.0127056
chromosome	queC	1,030,476..1,031,147	672	<=	queC, 7-cyano-7-deazaguanine synthase QueC	queC	ACX60_RS04860	ABUW_1012	A1S_2542	KZA74_04875	974.559	0.159646	-0.394775	2.14687	0.97575	0.837046	6.38134e-12
chromosome	lepB	1,049,248..1,050,075	828	=>	lepB, signal peptidase I	lepB	ACX60_RS04955	ABUW_1030	A1S_2521	KZA74_04970	949.581	-0.206842	-0.564087	1.65383	0.97575	0.837046	0.000369895
chromosome	era	1,051,149..1,052,171	1023	=>	era, GTPase Era	era, ERAL1	ACX60_RS04970	ABUW_1033	A1S_2518	KZA74_04985	2548.02	-0.277183	-0.676686	1.48921	0.97575	0.837046	0.0148876
chromosome	pdxJ	1,053,127..1,053,852	726	=>	pdxJ, pyridoxine 5'-phosphate synthase	pdxJ	ACX60_RS04985	ABUW_1036	A1S_2516	KZA74_05000	587.348	-0.10495	-0.319125	0.310955	0.97575	0.837046	0.280797
chromosome	KZA74_05175	1,090,474..1,090,956	483	<=	peptidylprolyl isomerase	slyD	ACX60_RS05155	ABUW_1068	A1S_2481	KZA74_05175	5951.85	-0.351085	-0.820926	1.53461	0.97575	0.837046	0.0701244
chromosome	KZA74_05190	1,093,970..1,095,673	1704	=>	M61 family metallopeptidase	NA	ACX60_RS05170	ABUW_1071	A1S_2478	KZA74_05190	2107.24	-0.24477	-0.6034	1.13169	0.97575	0.837046	0.0401921
chromosome	KZA74_05235	1,104,380..1,105,774	1395	=>	L-cystine transporter	K06956	ACX60_RS05210	ABUW_1080	A1S_2472	KZA74_05235	1239.73	0.136412	-0.353894	0.281913	0.97575	0.837046	0.389441
chromosome	KZA74_05875	1,261,411..1,264,260	2850	<=	EAL domain-containing protein	NA	ACX60_RS05845	ABUW_1221	A1S_2337	KZA74_05875	782.913	-0.0962137	0.318195	0.525725	0.97575	0.837046	0.0483943
chromosome	KZA74_05990	1,288,451..1,289,101	651	<=	KZA74_05990	NA	ACX60_RS05965	ABUW_1245	A1S_2314	KZA74_05990	413.88	-0.190699	-0.645278	1.11577	0.97575	0.837046	0.012043
chromosome	yegQ	1,307,652..1,309,022	1371	<=	yegQ, tRNA 5-hydroxyuridine modification protein YegQ	K08303	ACX60_RS06060	ABUW_1345	A1S_2296	KZA74_06090	1222.44	0.107225	-0.474978	1.4577	0.97575	0.837046	3.23911e-08
chromosome	KZA74_06205	1,334,526..1,335,986	1461	=>	aminoacyl-histidine dipeptidase	pepD	ACX60_RS06175	ABUW_1368	A1S_2274	KZA74_06205	931.596	-0.159672	-0.443378	-0.817225	0.97575	0.837046	0.0358214
chromosome	KZA74_06220	1,337,799..1,338,182	384	<=	KZA74_06220	NA	ACX60_RS06190	NA	NA	KZA74_06220	59.761	0.270702	0.632289	-1.3735	0.97575	0.837046	0.0136179
chromosome	KZA74_06295	1,349,917..1,350,492	576	=>	nitroreductase	NA	ACX60_RS06265	ABUW_1380	A1S_2258	KZA74_06295	478.682	-0.127537	-0.558416	1.00782	0.97575	0.837046	0.000265687
chromosome	purF	1,355,468..1,357,009	1542	=>	purF, amidophosphoribosyltransferase	purF, PPAT	ACX60_RS06300	ABUW_1446	A1S_2251	KZA74_06330	2325.46	0.232705	-0.67726	0.564574	0.97575	0.837046	0.325985
chromosome	KZA74_06565	1,399,950..1,400,504	555	=>	TetR/AcrR family transcriptional regulator	NA	ACX60_RS06535	ABUW_1498	A1S_2208	KZA74_06565	76.5733	0.293345	0.800501	-3.67785	0.97575	0.837046	7.72137e-06
chromosome	KZA74_06645	1,415,592..1,416,287	696	<=	ABC transporter permease	metI	ACX60_RS06615	ABUW_1528	A1S_2193	KZA74_06645	867.451	-0.193306	-0.42056	1.8365	0.97575	0.837046	8.67852e-06
chromosome	KZA74_06650	1,416,284..1,417,309	1026	<=	methionine ABC transporter ATP-binding protein	metN	ACX60_RS06620	ABUW_1529	A1S_2192	KZA74_06650	1207.44	-0.172002	-0.587426	2.33565	0.97575	0.837046	5.07801e-07
chromosome	prmA	1,423,078..1,423,983	906	<=	prmA, 50S ribosomal protein L11 methyltransferase	prmA	ACX60_RS06650	ABUW_1535	A1S_2184	KZA74_06680	913.965	-0.176093	-0.352782	1.36315	0.97575	0.837046	0.000104664
chromosome	KZA74_06750	1,436,758..1,437,087	330	<=	cyoD, cytochrome o ubiquinol oxidase subunit IV	cyoD	ACX60_RS06720	ABUW_1550	A1S_2169	KZA74_06750	1595.73	-0.298201	-1.22391	1.53205	0.97575	0.837046	0.0474542
chromosome	cyoC	1,437,087..1,437,707	621	<=	cyoC, cytochrome o ubiquinol oxidase subunit III	cyoC	ACX60_RS06725	ABUW_1551	A1S_2168	KZA74_06755	5427.62	-0.393056	-1.30816	1.64533	0.97575	0.837046	0.0724238
chromosome	KZA74_06950	1,488,249..1,490,888	2640	=>	bifunctional aconitate hydratase2/2-methylisocitrate dehydratase	acnB	ACX60_RS06920	ABUW_1593	A1S_2126	KZA74_06950	11870.8	0.436638	-0.975028	0.936955	0.97575	0.837046	0.332615
chromosome	KZA74_07055	1,507,165..1,507,674	510	<=	peptidyl-prolyl cis-trans isomerase	PPIB, ppiB	ACX60_RS07025	ABUW_1614	A1S_2109	KZA74_07055	1431.11	-0.237153	-0.84033	1.59105	0.97575	0.837046	0.011772
chromosome	KZA74_07060	1,507,843..1,509,570	1728	=>	glutamine--tRNA ligase/YqeY domain fusionprotein	QARS, glnS	ACX60_RS07030	ABUW_1615	A1S_2108	KZA74_07060	2708.81	-0.231602	-0.709261	1.32253	0.97575	0.837046	0.0091026
chromosome	KZA74_07220	1,545,558..1,546,064	507	<=	N-acetyltransferase	yhbS	ACX60_RS07190	ABUW_1654	A1S_2078	KZA74_07220	97.5028	0.190355	0.517333	-0.491762	0.97575	0.837046	0.27044
chromosome	KZA74_07325	1,567,531..1,568,385	855	=>	KZA74_07325	NA	ACX60_RS07290	ABUW_1676	A1S_2060	KZA74_07325	818.186	0.201821	-0.69405	1.0453	0.97575	0.837046	0.0453473
chromosome	KZA74_07750	1,637,301..1,638,593	1293	<=	Y-family DNA polymerase, A1S_2015 umuC	umuC (P1)	ACX60_RS07705	NA	A1S_2015	KZA74_07750	661.184	0.167505	1.22711	1.79241	0.97575	0.837046	7.59842e-05
chromosome	KZA74_07765	1,640,668..1,641,831	1164	=>	MFS transporter	hcaT	ACX60_RS07720	ABUW_1694	A1S_2013	KZA74_07765	302.509	0.1864	0.460648	-1.2897	0.97575	0.837046	0.00559118
chromosome	KZA74_08080	1,699,215..1,699,664	450	<=	Lrp/AsnC family transcriptional regulator	kynR	ACX60_RS08020	ABUW_1755	A1S_1958	KZA74_08080	41.0131	-0.184066	0.742122	-0.75582	0.97575	0.837046	0.125197
chromosome	rpiA	1,751,151..1,751,822	672	=>	rpiA, ribose-5-phosphate isomerase RpiA	rpiA	ACX60_RS08260	ABUW_1807	A1S_1915	KZA74_08320	620.434	-0.184944	-0.671472	0.412173	0.97575	0.837046	0.340487
chromosome	KZA74_09260	1,948,319..1,948,609	291	=>	KZA74_09260	KZA74_09260	NA	NA	NA	KZA74_09260	18.7497	-0.349836	0.889182	0.257846	0.97575	0.837046	0.720116
chromosome	KZA74_09325	1,964,254..1,964,490	237	<=	KZA74_09325	KZA74_09325	NA	NA	NA	KZA74_09325	43.4415	0.319038	0.644989	-0.817086	0.97575	0.837046	0.235649
chromosome	KZA74_10085	2,121,153..2,121,587	435	<=	HIT domain-containing protein	NA	ACX60_RS09820	ABUW_2209	A1S_1624	KZA74_10085	706.407	-0.188221	-0.565628	1.87504	0.97575	0.837046	4.33725e-07
chromosome	rpsA	2,193,062..2,194,735	1674	<=	rpsA, 30S ribosomal protein S1	RP-S1, rpsA	ACX60_RS10235	ABUW_2242	A1S_1572	KZA74_10505	44620.3	-0.448431	-1.21031	2.09606	0.97575	0.837046	0.0278242
chromosome	cmk	2,194,840..2,195,526	687	<=	cmk, (d)CMP kinase	cmk	ACX60_RS10240	ABUW_2243	A1S_1571	KZA74_10510	2297.4	-0.252738	-0.752493	2.56783	0.97575	0.837046	1.02373e-06
chromosome	msbA	2,206,428..2,208,155	1728	<=	msbA, lipid A export permease/ATP-binding proteinMsbA	msbA	ACX60_RS10320	ABUW_2259	A1S_1555	KZA74_10590	1516.82	-0.140812	-0.434796	0.825198	0.97575	0.837046	0.018865
chromosome	KZA74_10650	2,218,905..2,220,092	1188	<=	phosphoglycerate kinase	PGK, pgk	ACX60_RS10380	ABUW_2271	A1S_1543	KZA74_10650	1322.92	-0.194999	-0.674606	1.17815	0.97575	0.837046	0.0147792
chromosome	metK	2,245,878..2,247,044	1167	=>	metK, methionine adenosyltransferase	metK	ACX60_RS10505	ABUW_2296	A1S_1519	KZA74_10775	2407.56	-0.229939	-0.883671	1.42014	0.97575	0.837046	0.00958151
chromosome	KZA74_10900	2,269,799..2,269,875	77	=>	tRNA-Met	NA	ACX60_RS10625	ABUW_2322	A1S_3674	KZA74_10900	136.413	0.312136	-1.18213	-2.8369	0.97575	0.837046	3.93272e-05
chromosome	ygaH	2,292,287..2,292,628	342	=>	ygaH, L-valine transporter subunit YgaH	NA	ACX60_RS10755	ABUW_2348	A1S_3670	KZA74_11025	98.7228	0.19287	0.529735	-0.759097	0.97575	0.837046	0.119296
chromosome	KZA74_11425	2,375,091..2,375,204	114	=>	KZA74_11425	NA	NA	NA	NA	KZA74_11425	12.2346	0.254854	0.707479	-4.02167	0.97575	0.837046	1.41043e-05
chromosome	soxR	2,467,575..2,468,027	453	<=	soxR, redox-sensitive transcriptional activator SoxR	soxR	ACX60_RS11550	ABUW_2555	A1S_1320	KZA74_11835	121.26	-0.138492	0.38093	-0.844899	0.97575	0.837046	0.0223206
chromosome	tssF	2,491,158..2,492,969	1812	<=	tssF, type VI secretion system baseplate subunit TssF	tssF, impG, vasA	ACX60_RS11655	ABUW_2576	A1S_1298	KZA74_11940	266.439	0.127767	0.645025	0.0270688	0.97575	0.837046	0.944268
chromosome	KZA74_12115	2,535,827..2,536,504	678	=>	HAD family hydrolase	K07025, mupP	ACX60_RS11830	NA	A1S_1263	KZA74_12115	95.512	0.173852	0.514695	0.442403	0.97575	0.837046	0.317984
chromosome	KZA74_12400	2,587,160..2,587,516	357	=>	yhjQ, four-helix bundle copper-binding protein	yhjQ	ACX60_RS12120	ABUW_2703	NA	KZA74_12400	352.703	0.257986	-0.711671	-1.02601	0.97575	0.837046	0.168948
chromosome	KZA74_13205	2,746,288..2,746,995	708	=>	cache domain-containing protein	NA	ACX60_RS12925	ABUW_2805	A1S_1086	KZA74_13205	231.444	0.114676	0.3098	0.0855798	0.97575	0.837046	0.799545
chromosome	pepP	2,812,414..2,813,736	1323	<=	pepP, Xaa-Pro aminopeptidase	pepP	ACX60_RS13180	ABUW_2856	A1S_1039	KZA74_13455	1661.07	-0.206491	-0.671318	0.473938	0.97575	0.837046	0.346852
chromosome	KZA74_13460	2,813,804..2,814,436	633	<=	UPF0149 family protein	K09895, ygfB	ACX60_RS13185	ABUW_2857	A1S_1038	KZA74_13460	979.47	-0.209674	-0.543566	0.588253	0.97575	0.837046	0.250671
chromosome	ureG	2,839,774..2,840,388	615	<=	ureG, urease accessory protein UreG	ureG	ACX60_RS13290	ABUW_2879	A1S_1017	KZA74_13580	324.237	-0.144942	-0.386105	-0.694287	0.97575	0.837046	0.0351193
chromosome	minD	2,994,791..2,995,603	813	=>	minD, septum site-determining protein MinD	minD	ACX60_RS13980	ABUW_3049	A1S_0880	KZA74_14290	2918.52	-0.291165	-0.777732	1.28874	0.97575	0.837046	0.0819368
chromosome	metG	3,093,538..3,095,601	2064	=>	metG, methionine--tRNA ligase	MARS, metG	ACX60_RS14470	ABUW_3148	A1S_0778	KZA74_14785	2241.96	-0.152678	-0.484251	1.55761	0.97575	0.837046	8.0787e-05
chromosome	hisC	3,201,257..3,202,342	1086	<=	hisC, histidinol-phosphate transaminase	hisC	ACX60_RS14945	ABUW_3247	A1S_0688	KZA74_15260	629.839	-0.0943624	-0.347066	0.484231	0.97575	0.837046	0.0341399
chromosome	murA	3,204,490..3,205,746	1257	<=	murA, UDP-N-acetylglucosamine1-carboxyvinyltransferase	murA	ACX60_RS14960	ABUW_3250	A1S_0685	KZA74_15275	1668.09	-0.171971	-0.67586	0.970156	0.97575	0.837046	0.0112428
chromosome	rho	3,234,412..3,235,680	1269	=>	rho, transcription termination factor Rho	rho	ACX60_RS15095	ABUW_3277	A1S_0604	KZA74_15410	5813.48	-0.322314	-0.720087	2.17557	0.97575	0.837046	0.000925935
chromosome	KZA74_15440	3,240,363..3,241,364	1002	=>	KZA74_15440	NA	ACX60_RS15120	ABUW_3282	A1S_0600	KZA74_15440	360.75	0.110503	0.295152	0.348673	0.97575	0.837046	0.205491
chromosome	KZA74_15670	3,286,469..3,288,061	1593	<=	peptide chain release factor 3	prfC	ACX60_RS15345	ABUW_3350	A1S_0554	KZA74_15670	1362.58	-0.116834	-0.405171	0.382667	0.97575	0.837046	0.165568
chromosome	KZA74_15925	3,342,344..3,343,135	792	<=	DUF4115 domain-containing protein	rodZ	ACX60_RS15600	ABUW_3378	A1S_0501	KZA74_15925	1170.84	-0.214218	-0.698444	1.17499	0.97575	0.837046	0.0247862
chromosome	KZA74_16700	3,517,032..3,519,881	2850	=>	monovalent cation/H+ antiporter subunit A	phaA	ACX60_RS16375	ABUW_3534	A1S_0343	KZA74_16700	2915.85	-0.110473	-0.290187	0.978459	0.97575	0.837046	0.00083587
chromosome	infB	3,523,734..3,526,433	2700	<=	infB, translation initiation factor IF-2	infB, MTIF2	ACX60_RS16410	ABUW_3541	A1S_0336	KZA74_16735	14244.6	-0.401788	-1.23664	1.50389	0.97575	0.837046	0.0771658
chromosome	KZA74_16895	3,556,980..3,559,901	2922	<=	ATP-binding protein	ATP-binding	ACX60_RS16565	NA	A1S_0304	KZA74_16895	713.251	0.114663	0.313715	-0.487341	0.97575	0.837046	0.0703708
chromosome	KZA74_16975	3,574,000..3,574,365	366	<=	DNA transfer protein p32	p32	ACX60_RS16645	ABUW_3588	A1S_3492	KZA74_16975	403.782	0.223658	0.55238	-3.88777	0.97575	0.837046	7.11351e-16
chromosome	KZA74_17285	3,638,143..3,638,802	660	<=	riboflavin synthase	ribE, RIB5	ACX60_RS16955	ABUW_3650	A1S_0223	KZA74_17285	1181.93	-0.16514	-0.435881	0.824105	0.97575	0.837046	0.0489111
chromosome	atpD	3,710,842..3,712,236	1395	<=	atpD, F0F1 ATP synthase subunit beta	ATPF1B, atpD	ACX60_RS17305	ABUW_3732	A1S_0155	KZA74_17640	15441.9	-0.386071	-1.50313	1.45239	0.97575	0.837046	0.185935
chromosome	atpG	3,712,267..3,713,136	870	<=	atpG, F0F1 ATP synthase subunit gamma	ATPF1G, atpG	ACX60_RS17310	ABUW_3733	A1S_0154	KZA74_17645	8113.99	-0.388708	-1.44188	1.24177	0.97575	0.837046	0.247487
chromosome	KZA74_18245	3,843,461..3,844,108	648	=>	TetR/AcrR family transcriptional regulator	tetR	ACX60_RS17890	ABUW_3845	A1S_0038	KZA74_18245	293.584	0.139835	0.423148	0.766959	0.97575	0.837046	0.00713235
chromosome	dmeF	3,896,002..3,896,982	981	<=	dmeF, CDF family Co(II)/Ni(II) efflux transporterDmeF	dmeF	ACX60_RS18160	ABUW_3900	A1S_2977	KZA74_18510	303.45	0.19717	0.613957	-2.50976	0.97575	0.837046	1.72653e-06
pAB3	KZA74_19085	106,174..106,467	294	=>	DotI/IcmL family type IV secretion protein	NA	NA	NA	A1S_3539	KZA74_19085	250.711	-0.181302	-0.546651	0.896139	0.97575	0.837046	0.0255948
pAB3	KZA74_19265	141,174..142,136	963	=>	thioredoxin-disulfide reductase	NA	NA	NA	NA	KZA74_19265	26.9361	-0.235755	-0.568883	-0.589285	0.97575	0.837046	0.270358
pAB1	KZA74_19355	8634..9002	369	<=	LysR family transcriptional regulator	NA	NA	NA	NA	KZA74_19355	812.655	0.163169	0.426642	-0.501113	0.97575	0.837046	0.265011
pAB2	KZA74_19440	8705..9403	699	=>	CPBP family intramembrane metalloprotease	NA	NA	NA	NA	KZA74_19440	359.652	-0.219646	0.681427	-0.331984	0.97575	0.837046	0.60767
chromosome	argS	3,724,725..3,726,515	1791	=>	argS, arginine--tRNA ligase	argS, RARS	ACX60_RS17380	ABUW_3747	A1S_0138	KZA74_17715	2851.93	-0.177154	-0.673226	1.11153	0.976854	0.837046	0.0299311
chromosome	rpsJ	440,833..441,144	312	=>	rpsJ, 30S ribosomal protein S10	RP-S10, MRPS10, rpsJ	ACX60_RS02090	ABUW_0405	A1S_3081	KZA74_02090	11792.2	-0.351238	-1.63555	2.50423	0.977542	0.837046	0.0136289
chromosome	rpsM	451,570..451,926	357	=>	rpsM, 30S ribosomal protein S13	RP-S13, rpsM	ACX60_RS02205	ABUW_0428	A1S_3059	KZA74_02205	9700.29	-0.355805	-1.55278	1.95985	0.977542	0.837046	0.0615554
chromosome	rpsT	2,129,102..2,129,368	267	=>	rpsT, 30S ribosomal protein S20	RP-S20, rpsT	ACX60_RS09855	ABUW_2216	A1S_1617	KZA74_10120	5497.31	-0.284575	-0.99803	2.27877	0.977542	0.837046	0.00563406
chromosome	KZA74_12465	2,601,411..2,602,517	1107	<=	beta-ketoacyl-ACP synthase III	E2.3.1.207	ACX60_RS12185	ABUW_2717	A1S_1208	KZA74_12465	1628.04	-0.160753	-0.667928	1.09956	0.977542	0.837046	0.0186745
chromosome	KZA74_14550	3,043,665..3,044,045	381	=>	aspartate 1-decarboxylase	panD	ACX60_RS14235	ABUW_3100	A1S_0825	KZA74_14550	673.761	-0.151683	-0.538184	1.58013	0.977542	0.837046	0.000217755
pAB3	KZA74_19175	123,516..123,608	93	=>	KZA74_19175	NA	NA	NA	NA	KZA74_19175	22.5875	0.259652	0.931346	0.706654	0.977542	0.837046	0.338159
chromosome	KZA74_00475	103,283..104,590	1308	<=	KZA74_00475	advA	ACX60_RS00475	ABUW_0096	A1S_3387	KZA74_00475	1954.61	-0.151434	-0.459606	1.41811	0.978617	0.837046	0.00221657
chromosome	KZA74_01135	247,920..248,582	663	<=	KZA74_01135	NA	ACX60_RS01150	NA	A1S_3892	KZA74_01135	179.946	0.136014	0.664428	-1.76625	0.978617	0.837046	7.42867e-06
chromosome	ettA	288,117..289,778	1662	=>	ettA, energy dependent transcriptional throttle	ettA	ACX60_RS01385	ABUW_0262	A1S_3221	KZA74_01375	7365.07	-0.219782	-1.11871	1.96008	0.978617	0.837046	0.007235
chromosome	rpsD	452,345..452,971	627	=>	rpsD, 30S ribosomal protein S4	RP-S4, rpsD	ACX60_RS02215	ABUW_0430	A1S_3057	KZA74_02215	17708.6	-0.314136	-1.66162	1.86083	0.978617	0.837046	0.0814102
chromosome	KZA74_03615	745,160..746,200	1041	=>	mre, rod shape-determining protein	mreB	ACX60_RS03605	ABUW_0715	A1S_2781	KZA74_03615	2182.51	-0.170349	-0.702136	1.18052	0.978617	0.837046	0.0382211
chromosome	KZA74_03805	784,463..787,342	2880	<=	valine--tRNA ligase	VARS, valS	ACX60_RS03795	ABUW_0836	A1S_2742	KZA74_03805	4788.58	-0.184896	-0.89796	1.09882	0.978617	0.837046	0.0514745
chromosome	rpoD	812,301..814,187	1887	<=	rpoD, RNA polymerase sigma factor RpoD	rpoD	ACX60_RS03930	ABUW_0862	A1S_2706	KZA74_03940	10978.4	-0.247903	-0.827178	1.75572	0.978617	0.837046	0.0234353
chromosome	ftsH	862,245..864,140	1896	=>	ftsH, ATP-dependent zinc metalloprotease FtsH	ftsH, hflB	ACX60_RS04110	ABUW_0899	A1S_2681	KZA74_04130	24110.2	-0.278276	-1.07515	0.893779	0.978617	0.837046	0.315484
chromosome	KZA74_04600	964,095..965,066	972	<=	class 1 fructose-bisphosphatase	FBP, fbp	ACX60_RS04575	ABUW_0990	A1S_2596	KZA74_04600	802.679	-0.121364	-0.417585	1.89418	0.978617	0.837046	2.72953e-08
chromosome	proB	1,074,508..1,075,641	1134	=>	proB, glutamate 5-kinase	proB	ACX60_RS05085	ABUW_1054	A1S_2497	KZA74_05105	2070.91	0.173496	-0.628616	-0.36509	0.978617	0.837046	0.55089
chromosome	KZA74_05330	1,126,633..1,128,006	1374	=>	diaminobutyrate--2-oxoglutarate transaminase	ectB, dat	ACX60_RS05305	ABUW_1109	A1S_2454	KZA74_05330	8144.47	-0.248157	-0.913817	1.19385	0.978617	0.837046	0.139564
chromosome	KZA74_06780	1,444,429..1,445,265	837	=>	kinase/pyrophosphorylase	ppsR	ACX60_RS06750	ABUW_1556	A1S_2163	KZA74_06780	650.274	0.0941455	-0.367744	1.03172	0.978617	0.837046	0.000151909
chromosome	ilvA	1,749,502..1,751,049	1548	<=	ilvA, threonine ammonia-lyase, biosynthetic	E4.3.1.19, ilvA, tdcB	ACX60_RS08255	ABUW_1806	A1S_1916	KZA74_08315	1744.06	-0.142404	-0.525922	0.520846	0.978617	0.837046	0.245962
chromosome	KZA74_08845	1,861,874..1,862,014	141	=>	KZA74_08845		ACX60_RS08790	NA	NA	KZA74_08845	17.914	0.188364	0.668774	-1.67611	0.978617	0.837046	0.00688414
chromosome	KZA74_10420	2,181,094..2,181,759	666	=>	helix-turn-helix domain-containing protein	NA	ACX60_RS10155	NA	A1S_3687	KZA74_10420	414.46	0.113967	-0.382437	-0.17713	0.978617	0.837046	0.633461
chromosome	KZA74_12125	2,537,159..2,537,617	459	<=	KZA74_12125	NA	ACX60_RS11840	ABUW_2621	A1S_3641	KZA74_12125	181.509	0.153787	-0.474119	-0.678962	0.978617	0.837046	0.159887
chromosome	alaS	2,637,461..2,640,097	2637	=>	alaS, alanine--tRNA ligase	AARS, alaS	ACX60_RS12340	ABUW_2748	A1S_1176	KZA74_12625	3290.06	-0.151675	-0.661785	1.38479	0.978617	0.837046	0.0030826
chromosome	argG	2,781,822..2,783,180	1359	=>	argG, argininosuccinate synthase	argG, ASS1	ACX60_RS13045	ABUW_2823	A1S_1068	KZA74_13320	3138.57	-0.18841	-1.02189	1.19353	0.978617	0.837046	0.058487
chromosome	pth	3,042,952..3,043,533	582	=>	pth, aminoacyl-tRNA hydrolase	PTH1, pth, spoVC	ACX60_RS14230	ABUW_3099	A1S_0826	KZA74_14545	658.509	0.120964	-0.630475	1.82816	0.978617	0.837046	1.57437e-07
chromosome	KZA74_14605	3,052,285..3,052,845	561	<=	DUF177 domain-containing protein	K07040	ACX60_RS14290	ABUW_3111	A1S_0815	KZA74_14605	5903.83	0.247368	-0.96101	2.30738	0.978617	0.837046	0.00434707
chromosome	panC	3,252,246..3,253,094	849	<=	panC, pantoate--beta-alanine ligase	panC	ACX60_RS15190	ABUW_3295	A1S_0587	KZA74_15510	755.418	-0.0895259	-0.521054	1.13991	0.978617	0.837046	1.78594e-05
chromosome	KZA74_15725	3,302,178..3,303,902	1725	<=	ilvH, acetolactate synthase 3 large subunit	E2.2.1.6L, ilvB, ilvG, ilvI	ACX60_RS15400	ABUW_3357	A1S_0543	KZA74_15725	3653.34	-0.212914	-0.702407	1.17671	0.978617	0.837046	0.0728554
chromosome	KZA74_15770	3,314,971..3,315,702	732	<=	Bax inhibitor-1/YccA family protein	baxI, yccA	ACX60_RS15445	ABUW_3366	A1S_0533	KZA74_15770	2586.4	0.252166	-0.857962	1.40421	0.978617	0.837046	0.081737
chromosome	der	3,336,449..3,337,858	1410	<=	der, ribosome biogenesis GTPase Der	engA, der	ACX60_RS15575	ABUW_3373	A1S_0506	KZA74_15900	1973.17	-0.107109	-0.517043	1.07788	0.978617	0.837046	0.00182338
chromosome	KZA74_16290	ND	ND	ND	asd, aspartate-semialdehyde dehydrogenase	asd	ACX60_RS15965	ABUW_3451	A1S_0427	KZA74_16290	1436.84	0.150178	-0.549676	0.807617	0.978617	0.837046	0.0768963
chromosome	ubiE	3,508,175..3,509,122	948	=>	ubiE, bifunctional demethylmenaquinone methyltransferase/2-methoxy-6-polyprenyl-1,4-benzoquinol methylase UbiE	ubiE	ACX60_RS16340	ABUW_3527	A1S_0350	KZA74_16665	1665.01	-0.123531	-0.46041	1.64352	0.978617	0.837046	1.39214e-05
chromosome	KZA74_17190	3,617,839..3,618,090	252	<=	KZA74_17190	NA	ACX60_RS16860	ABUW_3631	A1S_0244	KZA74_17190	400.02	-0.210674	-0.844729	0.692625	0.978617	0.837046	0.289559
chromosome	pbpG	3,625,100..3,626,146	1047	<=	pbpG, D-alanyl-D-alanine endopeptidase PBP7/8	pbpG	ACX60_RS16895	ABUW_3638	A1S_0237	KZA74_17225	4927.02	-0.228539	-0.861916	0.569842	0.978617	0.837046	0.457082
chromosome	KZA74_17460	3,675,697..3,676,320	624	=>	TIGR00730 family Rossman fold protein	ppnN	ACX60_RS17125	ABUW_3696	A1S_0189	KZA74_17460	478.44	0.071841	0.300602	0.660031	0.978617	0.837046	0.0028006
chromosome	KZA74_17760	3,733,550..3,734,767	1218	=>	DUF445 family protein	NA	ACX60_RS17425	ABUW_3756	A1S_0129	KZA74_17760	705.034	-0.0722361	-0.324996	0.354246	0.978617	0.837046	0.119002
pAB3	KZA74_19095	107,219..108,349	1131	=>	DotG/IcmE/VirB10 family protein	NA	NA	NA	AS1_3540	KZA74_19095	653.836	-0.121589	-0.54091	0.353369	0.978617	0.837046	0.386416
pAB1	KZA74_19350	8295..8432	138	<=	transposase	NA	NA	NA	NA	KZA74_19350	446.525	0.153473	0.694734	1.48831	0.978617	0.837046	0.00162961
chromosome	guaB	180,487..181,953	1467	=>	guaB, IMP dehydrogenase	IMPDH, guaB	ACX60_RS00845	ABUW_0162	A1S_3321	KZA74_00825	4493.57	0.165402	-0.640378	1.2475	0.978912	0.837046	0.0266798
chromosome	rplA	3,584,446..3,585,141	696	<=	rplA, 50S ribosomal protein L1	RP-L1, MRPL1, rplA	ACX60_RS16670	ABUW_3593	A1S_0284	KZA74_17000	12905.9	0.284116	-1.45108	1.88028	0.978912	0.837046	0.0556594
chromosome	mpl	3,884,827..3,886,200	1374	=>	mpl, UDP-N-acetylmuramate:L-alanyl-gamma-D-glutamyl- meso-diaminopimelate ligase	mpl	ACX60_RS18100	ABUW_3888	A1S_2966	KZA74_18455	1229.56	-0.0870647	-0.371282	-0.00192987	0.978912	0.837046	0.995986
chromosome	rnpA	3,900,893..3,901,285	393	<=	rnpA, ribonuclease P protein component	rnpA	ACX60_RS18185	ABUW_3905	A1S_2983	KZA74_18535	1573.72	0.182617	-0.903757	3.0569	0.978912	0.837046	2.8076e-07
chromosome	fba	2,217,379..2,218,416	1038	<=	fba, fructose-bisphosphate aldolase class II	FBA, fbaA	ACX60_RS10370	ABUW_2269	A1S_1544	KZA74_10640	3605.68	0.221143	-0.934042	1.29714	0.979505	0.837046	0.096645
chromosome	KZA74_16925	3,563,604..3,564,308	705	=>	DsbA family oxidoreductase	dsbA	ACX60_RS16595	ABUW_3578	A1S_0298	KZA74_16925	615.956	-0.0807364	-0.313131	1.25826	0.97967	0.837046	2.20593e-06
chromosome	KZA74_00895	196,449..196,862	414	=>	lrpC, transcriptional regulator	lrpC	ACX60_RS00915	ABUW_0177	A1S_3307	KZA74_00895	117.108	0.123513	0.493847	-0.439391	0.980598	0.837046	0.322355
chromosome	KZA74_00985	220,016..221,098	1083	=>	KZA74_00985	K09799	ACX60_RS01005	ABUW_0195	A1S_3289	KZA74_00985	973.912	-0.0801029	-0.434354	0.293031	0.980598	0.837046	0.327213
chromosome	rng	748,214..749,668	1455	=>	rng, ribonuclease G	rng, cafA	ACX60_RS03625	ABUW_0719	A1S_2777	KZA74_03635	1206.79	-0.0808508	-0.410656	0.7364	0.980598	0.837046	0.0103159
chromosome	KZA74_03730	768,123..768,977	855	<=	SPFH/Band 7/PHB domain protein	NA	ACX60_RS03720	ABUW_0821	A1S_2758	KZA74_03730	1033.89	-0.120851	-0.699072	0.6276	0.980598	0.837046	0.157697
chromosome	KZA74_05085	1,070,028..1,071,485	1458	=>	glyceraldehyde-3-phosphate dehydrogenase	GAPDH, gapA	ACX60_RS05065	ABUW_1050	A1S_2501	KZA74_05085	4265.08	-0.197721	-1.23176	1.77116	0.980598	0.837046	0.013556
chromosome	glnA	1,248,750..1,250,165	1416	=>	glnA, type I glutamate--ammonia ligase	glnA, GLUL	ACX60_RS05775	ABUW_1207	A1S_2351	KZA74_05805	10525.2	-0.252513	-1.42187	2.43667	0.980598	0.837046	0.00684069
chromosome	KZA74_06035	1,295,124..1,296,377	1254	=>	serine hydroxymethyltransferase	glyA, SHMT	ACX60_RS06005	ABUW_1333	A1S_2307	KZA74_06035	3131.83	-0.159472	-0.778765	1.93989	0.980598	0.837046	0.000576521
chromosome	KZA74_13875	2,905,314..2,906,636	1323	<=	glutaminase	glsA, GLS	ACX60_RS13570	ABUW_2936	A1S_0962	KZA74_13875	1158.5	0.0995722	-0.431041	-0.627745	0.980598	0.837046	0.089686
chromosome	dapD	1,031,977..1,032,798	822	<=	dapD, 2,3,4,5-tetrahydropyridine-2,6-dicarboxylate N-succinyltransferase	dapD	ACX60_RS04870	ABUW_1014	A1S_2539	KZA74_04885	2071.1	-0.151346	-0.78358	1.50854	0.98075	0.837046	0.00640483
chromosome	grxD	1,727,078..1,727,419	342	<=	grxD, Grx4 family monothiol glutaredoxin	grxD, GLRX5	ACX60_RS08135	ABUW_1781	A1S_1937	KZA74_08195	1217.37	-0.166557	-0.63196	1.51548	0.98075	0.837046	0.0130887
chromosome	leuB	3,430,421..3,431,500	1080	<=	leuB, 3-isopropylmalate dehydrogenase	leuB, IMDH	ACX60_RS16010	ABUW_3460	A1S_0420	KZA74_16335	1611.04	-0.119429	-0.571706	0.142223	0.9809	0.837046	0.768436
chromosome	KZA74_18340	3,862,350..3,862,832	483	=>	peptidylprolyl isomerase	slpA	ACX60_RS17985	ABUW_3864	A1S_0018	KZA74_18340	675.158	0.144585	-0.606305	1.39211	0.981253	0.837046	0.00864395
chromosome	KZA74_04520	945,923..947,158	1236	=>	lipoprotein-releasing ABC transporter permeasesubunit	lolC_E	ACX60_RS04495	ABUW_0974	A1S_2612	KZA74_04520	1139.77	-0.0868618	-0.349108	0.974138	0.981995	0.837046	0.00229835
chromosome	KZA74_05030	1,056,492..1,056,929	438	<=	PaaI family thioesterase	paaI	ACX60_RS05010	ABUW_1041|ABUW_2461	A1S_2511	KZA74_05030	145.45	0.101815	0.410858	-0.5781	0.981995	0.837046	0.130114
chromosome	atpE	3,715,863..3,716,108	246	<=	atpE, F0F1 ATP synthase subunit C	ATPF0C, atpE	ACX60_RS17330	ABUW_3737	A1S_0150	KZA74_17665	2301.04	-0.222982	-1.20865	2.11602	0.981995	0.837046	0.0118075
chromosome	prpB	3,799,669..3,800,553	885	<=	prpB, methylisocitrate lyase	prpB	ACX60_RS17700	ABUW_3808	A1S_0073	KZA74_18045	1115.16	-0.117111	-0.519748	-0.867787	0.981995	0.837046	0.0519045
chromosome	KZA74_05145	1,083,133..1,084,038	906	<=	KZA74_05145	NA	ACX60_RS05125	ABUW_1062	A1S_2488	KZA74_05145	303.526	0.0752019	0.364132	0.294389	0.982385	0.837046	0.309458
chromosome	KZA74_07315	1,564,261..1,565,829	1569	<=	acetyl-CoA C-acetyltransferase	fadI, E2.3.1.9, atoB	ACX60_RS07280	ABUW_1674	A1S_3780	KZA74_07315	4077.51	0.181994	-1.06302	2.3783	0.982385	0.837046	0.000473816
chromosome	KZA74_11070	2,301,097..2,302,527	1431	=>	pyridoxal phosphate-dependent aminotransferase	alaA	ACX60_RS10800	ABUW_2357	A1S_1468	KZA74_11070	1096.23	0.105223	-0.433082	0.799024	0.982385	0.837046	0.0488958
chromosome	KZA74_07745	1,636,850..1,637,272	423	<=	KZA74_07745	NA	ACX60_RS07700	NA	NA	KZA74_07745	258.568	0.141877	1.22041	1.48891	0.982624	0.837046	0.00531639
pAB3	KZA74_19130	113,882..117,154	3273	=>	KZA74_19130	NA	NA	NA	A1S_3546	KZA74_19130	89.4317	0.0873769	-0.32665	0.884434	0.982925	0.837046	0.00438901
chromosome	gyrB	3794..6262	2469	=>	gyrB, DNA topoisomerase (ATP-hydrolyzing) subunit B	gyrB	ACX60_RS00020	ABUW_0004	A1S_0004	KZA74_00020	7811.04	-0.178656	-0.773034	0.74964	0.984383	0.837046	0.311953
chromosome	glmS	96,329..98,167	1839	<=	glmS, glutamine--fructose-6-phosphate transaminase (isomerizing)	glmS, GFPT	ACX60_RS00440	ABUW_0089	A1S_3395	KZA74_00440	4752.12	-0.178421	-0.737391	1.79151	0.984383	0.837046	0.0112428
chromosome	tmk	1,041,580..1,042,179	600	=>	tmk, dTMP kinase	tmk, DTYMK	ACX60_RS04920	ABUW_1024	A1S_2528	KZA74_04935	329.722	-0.0673586	-0.271271	0.397629	0.984383	0.837046	0.132339
chromosome	KZA74_14385	3,015,054..3,015,614	561	=>	KZA74_14385	NA	ACX60_RS14075	ABUW_3068	A1S_0860	KZA74_14385	130.404	-0.0899245	0.334586	0.347711	0.984383	0.837046	0.328491
chromosome	KZA74_17635	3,710,405..3,710,824	420	<=	atp , F0F1 ATP synthase subunit epsilon	ATPF1E, atpC	ACX60_RS17300	ABUW_3731	A1S_0156	KZA74_17635	5246.53	-0.250395	-1.47633	0.54263	0.984383	0.837046	0.6168
chromosome	KZA74_12315	2,575,471..2,575,815	345	<=	KZA74_12315	NA	ACX60_RS12030	ABUW_2685	NA	KZA74_12315	25.9717	0.145433	0.739678	-1.40457	0.984557	0.837046	0.0145714
chromosome	KZA74_17305	3,641,852..3,643,249	1398	<=	ammonium transporter	amt, AMT, MEP	ACX60_RS16975	ABUW_3654	A1S_0219	KZA74_17305	1901.29	-0.0951535	-0.39796	-0.56721	0.984557	0.837046	0.151596
chromosome	fumC	1,668,943..1,670,337	1395	=>	fumC, class II fumarate hydratase	E4.2.1.2B, fumC, FH	ACX60_RS07855	ABUW_1722	A1S_1986	KZA74_07905	1921.58	-0.132314	-0.596249	0.402229	0.984806	0.837046	0.480419
chromosome	dnaJ	45,249..46,361	1113	=>	dnaJ, molecular chaperone DnaJ	dnaJ	ACX60_RS00180	ABUW_0037	A1S_3443	KZA74_00180	2600.83	-0.119413	-0.580134	1.07494	0.986689	0.837046	0.0463743
chromosome	KZA74_00860	188,639..189,697	1059	=>	nemA, alkene reductase	nemA	ACX60_RS00880	ABUW_0170	A1S_3314	KZA74_00860	661.611	-0.0646268	-0.270385	-0.0886288	0.986689	0.837046	0.76082
chromosome	KZA74_00990	221,245..222,609	1365	=>	yajR, innner membrane transporter	yajR	ACX60_RS01010	ABUW_0196	A1S_3288	KZA74_00990	1637.55	0.0949484	-0.441384	0.260843	0.986689	0.837046	0.56324
chromosome	hisB	271,546..272,139	594	<=	hisB, imidazoleglycerol-phosphate dehydratase HisB	hisB	ACX60_RS01310	ABUW_0250	A1S_3234	KZA74_01295	1158.41	-0.121833	-0.648229	1.06425	0.986689	0.837046	0.0442027
chromosome	cyoE	1,435,869..1,436,747	879	<=	cyoE, heme o synthase	COX10, ctaB, cyoE	ACX60_RS06715	ABUW_1549	A1S_2170	KZA74_06745	1316.33	-0.123183	-0.803119	2.5332	0.986689	0.837046	6.21228e-07
chromosome	KZA74_08120	1,709,900..1,710,343	444	<=	usp, universal stress protein	usp	ACX60_RS08060	ABUW_1763	A1S_1950	KZA74_08120	1404.44	0.175998	-0.716867	0.745267	0.986689	0.837046	0.328491
chromosome	KZA74_10175	2,142,252..2,142,335	84	=>	KZA74_10175	NA	NA	NA	NA	KZA74_10175	6.43146	0.245352	1.2299	-3.21487	0.986689	0.837046	0.00949527
chromosome	KZA74_12945	2,686,101..2,686,658	558	=>	cytochrome b	cybB	ACX60_RS12665	ABUW_2753	A1S_1138	KZA74_12945	228.555	0.12871	0.52832	-0.478699	0.986689	0.837046	0.387947
chromosome	mqo	2,943,604..2,945,244	1641	=>	mqo, malate dehydrogenase (quinone)	mqo	ACX60_RS13750	ABUW_2973	A1S_0923	KZA74_14055	4069.56	0.147752	-0.857383	2.72135	0.986689	0.837046	9.10465e-06
chromosome	hisG	3,203,807..3,204,490	684	<=	hisG, ATP phosphoribosyltransferase	hisG	ACX60_RS14955	ABUW_3249	A1S_0686	KZA74_15270	750.876	-0.120486	-0.524497	0.356036	0.986689	0.837046	0.523747
chromosome	KZA74_17025	ND	ND	ND	tuf, elongation factor Tu	tuf, TUFM	ACX60_RS16695	ABUW_3598	A1S_0279	KZA74_17025	462.345	0.155948	-0.940428	2.81362	0.986689	0.837046	1.11065e-05
chromosome	KZA74_18210	3,836,409..3,836,576	168	<=	KZA74_18210		ACX60_RS17860	ABUW_3839	NA	KZA74_18210	65.5009	0.0955999	0.466748	-0.535046	0.986689	0.837046	0.199987
pAB3	KZA74_19125	112,858..113,865	1008	=>	ATP-binding protein, IcmB protein	NA	NA	NA	A1S_0646	KZA74_19125	1666.64	-0.107695	-0.453044	1.64819	0.986689	0.837046	0.00028951
chromosome	KZA74_01260	266,716..267,027	312	=>	antibiotic biosynthesis monooxygenase	abm	ACX60_RS01275	NA	A1S_3241	KZA74_01260	255.514	-0.114812	-0.729864	-0.496754	0.987173	0.837046	0.357976
chromosome	rimM	352,600..353,148	549	=>	rimM, ribosome maturation factor RimM	rimM	ACX60_RS01680	ABUW_0321	A1S_3163	KZA74_01675	8729.88	0.202031	-1.38259	1.88842	0.987173	0.837046	0.0403999
chromosome	tsf	1,280,723..1,281,598	876	=>	tsf, translation elongation factor Ts	tsf, TSFM	ACX60_RS05920	ABUW_1236	A1S_2322	KZA74_05945	4178.38	0.190508	-1.33534	2.21237	0.987406	0.837046	0.0113667
chromosome	KZA74_07650	1,620,003..1,620,524	522	=>	SH3 domain-containing protein	NA	ACX60_RS07615	NA	NA	KZA74_07650	204.604	0.0740255	0.357755	-0.25058	0.987406	0.837046	0.472071
chromosome	KZA74_08180	1, 724,747..1,725,511	795	=>	map, type I methionyl aminopeptidase	map	ACX60_RS08120	ABUW_1778	A1S_1940	KZA74_08180	734.807	-0.104239	-0.485613	0.156881	0.987406	0.837046	0.765078
chromosome	KZA74_10620	2,211,689..2,212,378	690	<=	nucleotidyltransferase family protein	murU	ACX60_RS10350	ABUW_2265	A1S_1549	KZA74_10620	563.292	-0.0699368	-0.470683	0.994918	0.987406	0.837046	0.00135708
chromosome	tig	3,371,842..3,373,176	1335	<=	tig, trigger factor	tig	ACX60_RS15720	ABUW_3402	A1S_0475	KZA74_16045	4559.67	-0.15757	-1.12241	1.60549	0.987406	0.837046	0.029249
chromosome	thrC	3,623,852..3,624,991	1140	=>	thrC, threonine synthase	thrC	ACX60_RS16890	ABUW_3637	A1S_0238	KZA74_17220	3449.56	-0.143017	-0.816048	1.80187	0.987406	0.837046	0.00614478
chromosome	KZA74_04445	928,398..929,330	933	=>	FAD-binding protein	fixB, etfA	ACX60_RS04425	ABUW_0959	A1S_2627	KZA74_04445	6813.45	0.200496	-0.994795	1.34917	0.988064	0.837046	0.170603
chromosome	KZA74_07215	1,545,142..1,545,525	384	=>	KZA74_07215	NA	ACX60_RS07185	ABUW_1653	NA	KZA74_07215	47.4986	-0.118758	0.817795	1.08626	0.988064	0.837046	0.0384531
chromosome	KZA74_17215	3,622,495..3,623,796	1302	=>	homoserine dehydrogenase	E1.1.1.3	ACX60_RS16885	ABUW_3636	A1S_0239	KZA74_17215	2189.82	-0.0969639	-0.545957	1.15627	0.988064	0.837046	0.010855
chromosome	KZA74_06655	1,417,385..1,418,251	867	<=	NLPA lipoprotein	metQ	ACX60_RS06625	NA	A1S_2190	KZA74_06655	1975.84	-0.140036	-0.902123	1.53382	0.988308	0.837046	0.0240631
chromosome	KZA74_09535	2,006,915..2,007,100	186	<=	KZA74_09535, sRNA maybe	NA	ACX60_RS09270	ABUW_2103	NA	KZA74_09535	70.1564	0.123986	0.621424	3.45662	0.988308	0.837046	8.45887e-12
chromosome	rpmG	3,401,323..3,401,478	156	=>	rpmG, 50S ribosomal protein L33	RP-L33, MRPL33, rpmG	ACX60_RS15865	ABUW_3431	NA	KZA74_16190	1195.53	-0.18535	-1.23077	0.293321	0.988308	0.837046	0.764607
chromosome	KZA74_16730	3,523,333..3,523,734	402	<=	rbfA, ribosome-binding factor A	rbfA	ACX60_RS16405	ABUW_3540	A1S_0338	KZA74_16730	1466.85	0.128108	-0.971207	1.13808	0.988308	0.837046	0.0693323
chromosome	KZA74_00680	148,020..148,565	546	=>	ankyrin	ankyrin	ACX60_RS00700	ABUW_0134	A1S_3349	KZA74_00680	932.956	-0.0834845	-0.559787	0.6484	0.988413	0.837046	0.16237
chromosome	rplC	441,202..441,840	639	=>	rplC, 50S ribosomal protein L3	RP-L3, MRPL3, rplC	ACX60_RS02095	ABUW_0406	A1S_3080	KZA74_02095	17096.5	-0.190345	-1.71366	2.2824	0.988413	0.837046	0.0233331
chromosome	KZA74_02240	457,474..457,731	258	=>	succinate dehydrogenase assembly factor 2	cptB	ACX60_RS02240	ABUW_0435	A1S_3052	KZA74_02240	323.339	-0.0831036	0.629663	0.140315	0.988413	0.837046	0.776428
chromosome	KZA74_03455	715,716..716,180	465	=>	KZA74_03455	NA	ACX60_RS03450	ABUW_0683	A1S_3839	KZA74_03455	129.698	0.0620873	0.35362	-0.706747	0.988413	0.837046	0.0372625
chromosome	KZA74_03910	807,028..807,588	561	=>	flavodoxin family protein	NA	ACX60_RS03900	ABUW_0856	A1S_2700	KZA74_03910	354.545	-0.068132	-0.505507	-0.275766	0.988413	0.837046	0.512552
chromosome	sdhD	820,971..821,336	366	=>	sdhD, succinate dehydrogenase, hydrophobic membraneanchor protein	sdhD, frdD	ACX60_RS03970	ABUW_0869	A1S_2712	KZA74_03980	1327.68	-0.112921	-1.18946	0.316257	0.988413	0.837046	0.668144
chromosome	KZA74_03990	823,199..823,909	711	=>	sdhB, succinate dehydrogenase iron-sulfur subunit	sdhB, frdB	ACX60_RS03980	ABUW_0871	A1S_2714	KZA74_03990	3065.31	0.137272	-1.03394	1.05401	0.988413	0.837046	0.19037
chromosome	KZA74_04055	847,419..849,074	1656	=>	poly alpha-glucosyltransferase	NA	ACX60_RS04035	ABUW_0886	A1S_2695	KZA74_04055	267.575	0.0704501	0.459993	-0.311931	0.988413	0.837046	0.383167
chromosome	KZA74_05310	1,122,593..1,123,687	1095	=>	acyl-CoA desaturase	E1.14.19.3	ACX60_RS05285	ABUW_1105	A1S_2458	KZA74_05310	5284.72	-0.139009	-0.990809	1.61027	0.988413	0.837046	0.0479718
chromosome	KZA74_08200	1,727,647..1,728,855	1209	=>	aspartate aminotransferase family protein	argD	ACX60_RS08140	ABUW_1782	A1S_1936	KZA74_08200	807.663	-0.0556632	-0.547574	0.0331019	0.988413	0.837046	0.926208
chromosome	fdx	2,119,246..2,119,584	339	=>	fdx, ISC system 2Fe-2S type ferredoxin	fdx	ACX60_RS09810	ABUW_2207	A1S_1627	KZA74_10075	268.427	-0.0761017	-0.455756	1.31034	0.988413	0.837046	0.00264092
chromosome	KZA74_10210	2,148,792..2,150,957	2166	<=	malate synthase G	aceB, glcB	ACX60_RS09940	ABUW_2234	A1S_1601	KZA74_10210	6191.92	0.147034	-0.914207	0.729517	0.988413	0.837046	0.410874
chromosome	KZA74_11055	2,299,110..2,299,955	846	<=	AraC family transcriptional regulator	NA	ACX60_RS10785	ABUW_2354	A1S_1471	KZA74_11055	542.898	0.0899297	-0.549257	-0.435888	0.988413	0.837046	0.404517
chromosome	KZA74_12380	2,584,623..2,584,817	195	=>	exodeoxyribonuclease VII	xseB	ACX60_RS12100	ABUW_2700	A1S_1221	KZA74_12380	47.4615	-0.0706282	0.633581	0.0685624	0.988413	0.837046	0.867163
chromosome	KZA74_12600	2,632,004..2,632,783	780	<=	putative Zn-dependent protease with chaperone function, M48 family metallopeptidase	loiP	ACX60_RS12315	ABUW_2743	A1S_1180	KZA74_12600	1741.51	0.12654	-0.726967	-0.650395	0.988413	0.837046	0.399883
chromosome	KZA74_12610	2,633,340..2,634,659	1320	<=	adenylosuccinate synthase	purA, ADSS	ACX60_RS12325	ABUW_2745	A1S_1179	KZA74_12610	4063.16	0.108332	-0.845626	1.3769	0.988413	0.837046	0.0308096
chromosome	KZA74_12650	2,644,092..2,645,390	1299	=>	rumB, A1S_1173	umuC (P3)	ACX60_RS12365	NA	A1S_1173	KZA74_12650	1075.57	-0.106847	1.43049	2.82444	0.988413	0.837046	3.31482e-08
chromosome	KZA74_12925	2,682,989..2,684,269	1281	=>	aspartate kinase	lysC	ACX60_RS12645	ABUW_2749	A1S_1142	KZA74_12925	2862.94	-0.112141	-0.898041	1.5436	0.988413	0.837046	0.0118795
chromosome	KZA74_13235	2,753,068..2,753,619	552	<=	TetR/AcrR family transcriptional regulator	NA	ACX60_RS12955	NA	A1S_1081	KZA74_13235	76.496	0.118567	0.694719	-4.21696	0.988413	0.837046	1.65122e-10
chromosome	KZA74_13400	2,803,960..2,804,667	708	<=	BON domain-containing protein	NA	ACX60_RS13125	ABUW_2845	A1S_1050	KZA74_13400	777.933	-0.0971497	-0.624419	0.584616	0.988413	0.837046	0.27088
chromosome	ubiH	2,811,174..2,812,382	1209	<=	ubiH, 2-octaprenyl-6-methoxyphenyl hydroxylase	ubiH	ACX60_RS13175	ABUW_2855	A1S_1040	KZA74_13450	1217.68	-0.0593648	-0.378877	0.05272	0.988413	0.837046	0.873399
chromosome	KZA74_13985	2,926,042..2,927,301	1260	<=	pgaC, poly-beta-1,6 N-acetyl-D-glucosamine synthase	pgaC, icaA	ACX60_RS13680	ABUW_2959	A1S_0939	KZA74_13985	827.691	-0.0385299	-0.228579	0.187122	0.988413	0.837046	0.39247
chromosome	thrS	3,246,545..3,248,467	1923	<=	thrS, threonine--tRNA ligase	TARS, thrS	ACX60_RS15165	ABUW_3290	A1S_0592	KZA74_15485	4809.56	-0.123749	-0.736718	1.61159	0.988413	0.837046	0.0124773
chromosome	grxC	3,318,134..3,318,391	258	=>	grxC, glutaredoxin 3	grxC, GLRX, GLRX2	ACX60_RS15465	ABUW_3370	A1S_0529	KZA74_15790	1282.48	-0.129439	-0.791842	1.90687	0.988413	0.837046	0.00791062
chromosome	ndk	3,345,297..3,345,728	432	<=	ndk, nucleoside-diphosphate kinase	ndk, NME	ACX60_RS15615	ABUW_3381	A1S_0498	KZA74_15940	3058.78	-0.170287	-1.10311	2.10736	0.988413	0.837046	0.0137791
chromosome	purU	3,397,715..3,398,578	864	<=	purU, formyltetrahydrofolate deformylase	purU	ACX60_RS15845	ABUW_3427	A1S_0451	KZA74_16170	851.842	-0.0553246	-0.293236	1.49864	0.988413	0.837046	9.701e-08
chromosome	rplL	3,583,206..3,583,577	372	<=	rplL, 50S ribosomal protein L7/L12	RP-L7, MRPL12, rplL	ACX60_RS16660	ABUW_3591	A1S_0286	KZA74_16990	8322.89	0.206865	-1.30328	2.0852	0.988413	0.837046	0.063898
chromosome	acnD	3,795,636..3,798,242	2607	<=	acnD, Fe/S-dependent 2-methylisocitrate dehydrataseAcnD	acnD	ACX60_RS17690	ABUW_3806	A1S_0076	KZA74_18035	5666.71	-0.136479	-0.817199	-1.28761	0.988413	0.837046	0.0836848
chromosome	galU	3,814,463..3,815,338	876	<=	galU, UTP--glucose-1-phosphate uridylyltransferaseGalU	galU	ACX60_RS17755	ABUW_3819	A1S_0062	KZA74_18105	1632.8	-0.106239	-0.658154	1.43166	0.988413	0.837046	0.0101499
chromosome	KZA74_18275	3,848,057..3,848,377	321	=>	RcnB family protein	rcnB	ACX60_RS17920	ABUW_3851	A1S_0032	KZA74_18275	293.371	-0.0860806	1.20028	1.31101	0.988413	0.837046	0.00914538
pAB1	KZA74_19305	1596..2186	591	=>	transglutaminase family protein	NA	NA	NA	NA	KZA74_19305	976.726	-0.0918761	0.50318	0.0342518	0.988413	0.837046	0.95232
chromosome	KZA74_03135	643,137..643,796	660	=>	phosphoribosylanthranilate isomerase	trpF	ACX60_RS03130	ABUW_0616	A1S_2876	KZA74_03135	599.87	-0.0483735	-0.295784	0.766907	0.988568	0.837046	0.00715635
chromosome	KZA74_09290	1,955,221..1,956,330	1110	<=	frmA, S-(hydroxymethyl)glutathione dehydrogenase/classIII alcohol dehydrogenase	frmA	NA	NA	NA	KZA74_09290	1010.19	0.0673892	-0.565638	-0.53793	0.988568	0.837046	0.201704
chromosome	argJ	3,176,598..3,177,818	1221	<=	argJ, bifunctional glutamateN-acetyltransferase/amino-acid acetyltransferase ArgJ	argJ	ACX60_RS14825	ABUW_3223	A1S_0712	KZA74_15140	1547.79	-0.0628808	-0.514098	0.291261	0.988568	0.837046	0.46493
chromosome	KZA74_00490	106,873..107,352	480	=>	SCP-2 sterol transfer family protein	NA	ACX60_RS00490	ABUW_0099	A1S_3384	KZA74_00490	2430.95	0.114702	-0.727502	1.10002	0.988591	0.837046	0.123762
chromosome	rpsE	448,836..449,333	498	=>	rpsE, 30S ribosomal protein S5	RP-S5, MRPS5, rpsE	ACX60_RS02180	ABUW_0423	A1S_3064	KZA74_02180	10999.9	-0.165276	-1.52741	1.92461	0.988591	0.837046	0.0596469
chromosome	gltP	3,418,777..3,420,063	1287	<=	gltP, glutamate/aspartate:proton symporter GltP	gltP, gltT	ACX60_RS15955	ABUW_3449	A1S_0429	KZA74_16280	2977.44	0.102568	-0.639914	1.98443	0.988793	0.837046	0.00205839
chromosome	ilvD	29,954..31,783	1830	=>	ilvD, dihydroxy-acid dehydratase	ilvD	ACX60_RS00130	ABUW_0026	A1S_3455	KZA74_00130	2480.72	0.059001	-0.601134	0.043336	0.9888	0.837046	0.926216
chromosome	ftsZ	166,923..168,098	1176	=>	ftsZ, cell division protein FtsZ	ftsZ	ACX60_RS00790	ABUW_0151	A1S_3331	KZA74_00770	6130.72	-0.117507	-0.777658	0.568074	0.9888	0.837046	0.486161
chromosome	glmM	182,103..183,440	1338	=>	glmM, phosphoglucosamine mutase	glmM	ACX60_RS00850	ABUW_0163	A1S_3320	KZA74_00830	2365.58	-0.0808548	-0.658247	0.795363	0.9888	0.837046	0.168948
chromosome	KZA74_01180	254,021..254,362	342	=>	DHCW motif cupin fold protein	NA	ACX60_RS01195	NA	NA	KZA74_01180	163.871	0.0504243	0.464808	-0.927947	0.9888	0.837046	0.00365492
chromosome	KZA74_01810	379,702..380,973	1272	=>	gdhA, glutamate dehydrogenase	GLUD1_2, gdhA	ACX60_RS01815	ABUW_0350	A1S_3134	KZA74_01810	6747.6	-0.123986	-0.954904	0.0327843	0.9888	0.837046	0.973928
chromosome	KZA74_01815	381,118..382,332	1215	=>	argd, astC_1, aspartate aminotransferase	astC	ACX60_RS01820	ABUW_0351	A1S_3132	KZA74_01815	1391.13	-0.0813565	-0.599788	-0.18795	0.9888	0.837046	0.765791
chromosome	rpsK	451,946..452,332	387	=>	rpsK, 30S ribosomal protein S11	RP-S11, MRPS11, rpsK	ACX60_RS02210	ABUW_0429	A1S_3058	KZA74_02210	10089.8	-0.145692	-1.56713	2.11279	0.9888	0.837046	0.0421406
chromosome	trpB	643,780..645,009	1230	=>	trpB, tryptophan synthase subunit beta	trpB	ACX60_RS03135	ABUW_0617	A1S_2875	KZA74_03140	1434.49	0.0553117	-0.601705	0.301572	0.9888	0.837046	0.445267
chromosome	KZA74_03290	677,385..678,560	1176	<=	thiolase family protein	E2.3.1.9, atoB	ACX60_RS03285	ABUW_0647	A1S_2842	KZA74_03290	1020.71	-0.043944	-0.301023	0.630128	0.9888	0.837046	0.0264404
chromosome	gltA	818,340..819,614	1275	<=	gltA, citrate (Si)-synthase	CS, gltA	ACX60_RS03960	ABUW_0867	A1S_2710	KZA74_03970	6675.62	-0.121327	-1.04577	1.44909	0.9888	0.837046	0.0936776
chromosome	KZA74_04385	916,004..916,396	393	=>	DUF1232 domain-containing protein	NA	ACX60_RS04365	ABUW_0946	A1S_2638	KZA74_04385	185.978	-0.0751206	0.550781	-0.614507	0.9888	0.837046	0.217246
chromosome	KZA74_05335	1,128,009..1,129,541	1533	=>	aspartate aminotransferase family protein	ddc	ACX60_RS05310	ABUW_1110	A1S_2453	KZA74_05335	5988.3	-0.10799	-0.765848	1.12024	0.9888	0.837046	0.129725
chromosome	trpC	1,235,966..1,236,772	807	<=	trpC, indole-3-glycerol phosphate synthase TrpC	trpC	ACX60_RS05740	ABUW_1200	A1S_2360	KZA74_05770	642.993	-0.0457149	-0.351974	1.50666	0.9888	0.837046	1.77886e-06
chromosome	KZA74_08235	1,732,823..1,733,419	597	=>	nitroreductase family protein	K07078	ACX60_RS08175	ABUW_1790	A1S_1929	KZA74_08235	543.204	-0.0590454	-0.422611	2.09164	0.9888	0.837046	1.43328e-08
chromosome	kdsA	1,770,195..1,771,052	858	=>	kdsA, 3-deoxy-8-phosphooctulonate synthase	kdsA	ACX60_RS08350	ABUW_1826	A1S_1899	KZA74_08410	1368.61	0.0884561	-0.843397	2.08936	0.9888	0.837046	0.00016983
chromosome	KZA74_09030	1,900,245..1,900,964	720	=>	helix-turn-helix transcriptional regulator	NA	ACX60_RS08975	ABUW_1947	A1S_1775	KZA74_09030	152.332	0.0720497	0.552276	-1.29455	0.9888	0.837046	0.005057
chromosome	KZA74_11005	2,289,700..2,290,392	693	=>	Crp/Fnr family transcriptional regulator	crp	ACX60_RS10735	ABUW_2344	A1S_1479	KZA74_11005	151.381	0.0481525	0.446125	-0.427321	0.9888	0.837046	0.220722
chromosome	KZA74_12950	2,686,702..2,687,700	999	<=	adenosine deaminase	ade	ACX60_RS12670	ABUW_2754	A1S_1137	KZA74_12950	583.88	-0.0462991	-0.505287	1.08703	0.9888	0.837046	0.000601474
chromosome	dut	2,988,279..2,988,731	453	<=	dut, dUTP diphosphatase	dut, DUT	ACX60_RS13950	ABUW_3042	A1S_0886	KZA74_14260	259.141	-0.0359337	-0.293903	-0.0458501	0.9888	0.837046	0.869981
chromosome	minE	2,995,606..2,995,878	273	=>	minE, cell division topological specificity factorMinE	minE	ACX60_RS13985	ABUW_3050	A1S_0879	KZA74_14295	752.937	-0.101466	-0.897206	0.787139	0.9888	0.837046	0.244038
chromosome	KZA74_14925	3,123,045..3,123,722	678	<=	nuoB, NADH-quinone oxidoreductase subunit B	nuoB	ACX60_RS14610	ABUW_3176	A1S_0753	KZA74_14925	1752.56	0.0896451	-0.890115	1.45974	0.9888	0.837046	0.0155506
chromosome	hisD	3,202,412..3,203,701	1290	<=	hisD, histidinol dehydrogenase	hisD	ACX60_RS14950	ABUW_3248	A1S_0687	KZA74_15265	2071.98	-0.0727715	-0.48442	0.81237	0.9888	0.837046	0.106126
chromosome	rplJ	3,583,620..3,584,126	507	<=	rplJ, 50S ribosomal protein L10	RP-L10, MRPL10, rplJ	ACX60_RS16665	ABUW_3592	A1S_0285	KZA74_16995	14440.3	0.146971	-1.34582	2.75147	0.9888	0.837046	0.0093565
chromosome	KZA74_18435	3,880,415..3,881,707	1293	<=	lytic murein transglycosylase	lytic transglycocosylase	ACX60_RS18080	ABUW_3883	A1S_2962	KZA74_18435	1850.3	-0.0687141	-0.645175	0.325435	0.9888	0.837046	0.54212
pAB1	KZA74_19310	2346..2858	513	<=	SMI1/KNR4 family protein	NA	NA	NA	NA	KZA74_19310	668.092	-0.0758641	0.62826	0.0563419	0.9888	0.837046	0.926208
chromosome	KZA74_01930	405,382..407,205	1824	<=	dmdC_1, 3-methylmercaptopropionyl-CoA dehydrogenase	dmdC	ACX60_RS01935	ABUW_0374	A1S_3111	KZA74_01930	3584.06	0.084214	-0.704278	2.08192	0.989453	0.837046	0.000804192
chromosome	rpoA	452,989..453,996	1008	=>	rpoA, DNA-directed RNA polymerase subunit alpha	rpoA	ACX60_RS02220	ABUW_0431	A1S_3056	KZA74_02220	23146.4	-0.136456	-1.59033	2.31224	0.989848	0.837046	0.0351193
chromosome	rpsB	1,279,833..1,280,585	753	=>	rpsB, 30S ribosomal protein S2	RP-S2, MRPS2, rpsB	ACX60_RS05915	ABUW_1235	A1S_2323	KZA74_05940	19289.5	0.132957	-1.28245	2.2695	0.989848	0.837046	0.0326405
chromosome	KZA74_09790	2,059,172..2,059,396	225	<=	KZA74_09790	NA	ACX60_RS09525	ABUW_2155	A1S_3713	KZA74_09790	44.3451	0.0675772	0.532401	1.3751	0.989848	0.837046	0.00449842
chromosome	ssrA	2,961,019..2,961,378	360	<=	ssrA, transfer-messenger RNA	ssrA	NA	NA	NA	KZA74_14135	554211	0.122344	-0.999885	0.276849	0.989848	0.837046	0.796325
chromosome	fusA	3,007,088..3,009,226	2139	<=	fusA, elongation factor G	fusA, GFM, EFG	ACX60_RS14040	ABUW_3061	A1S_0868	KZA74_14350	42448.6	0.127861	-1.40463	2.34846	0.989848	0.837046	0.0229076
chromosome	KZA74_17780	3,736,912..3,737,298	387	<=	KZA74_17780	hypo	ACX60_RS17445	ABUW_3760	A1S_0125	KZA74_17780	518.707	-0.072736	-0.569755	-0.547148	0.989848	0.837046	0.361101
pAB3	KZA74_19105	110,014..110,868	855	=>	type VI secretion protein	NA	NA	NA	A1S_3542	KZA74_19105	679.527	-0.0718388	-0.79627	1.79191	0.989848	0.837046	0.00134868
pAB1	KZA74_19325	4440..5153	714	<=	KZA74_19325	NA	NA	NA	NA	KZA74_19325	608.995	0.067507	0.754636	1.02657	0.989848	0.837046	0.0531743
chromosome	KZA74_08400	1,767,814..1,768,302	489	<=	internalin	NA	ACX60_RS08340	ABUW_1824	A1S_3744	KZA74_08400	1719.86	0.0850559	-0.883766	1.43991	0.991711	0.837046	0.0409747
chromosome	cybC	6300..6692	393	=>	cybC, cytochrome b562	cybC	ACX60_RS00025	ABUW_0005	A1S_0005	KZA74_00025	1145.38	-0.055375	-0.776225	0.744736	0.991879	0.837046	0.265247
chromosome	KZA74_00260	57,692..58,429	738	<=	dienelactone hydrolase	deh	ACX60_RS00255	ABUW_0052	A1S_3430	KZA74_00260	794.631	0.0217773	-0.397888	0.614485	0.991879	0.837046	0.0737933
chromosome	KZA74_00795	173,420..175,408	1989	=>	2-oxo acid dehydrogenase subu E2	aceF, DLAT, aceF, pdhC	ACX60_RS00815	ABUW_0156	A1S_3327	KZA74_00795	14067.8	-0.0756925	-1.03148	0.408369	0.991879	0.837046	0.672784
chromosome	KZA74_01255	266,320..266,712	393	=>	membrane protein	mp	ACX60_RS01270	ABUW_0243	A1S_3242	KZA74_01255	416.738	0.0290209	-0.379359	0.0884481	0.991879	0.837046	0.835779
chromosome	rplO	449,520..449,960	441	=>	rplO, 50S ribosomal protein L15	RP-L15, MRPL15, rplO	ACX60_RS02190	ABUW_0425	A1S_3062	KZA74_02190	9388.26	-0.0904921	-1.49846	1.94532	0.991879	0.837046	0.0477178
chromosome	KZA74_02305	469,773..472,139	2367	<=	KZA74_02305	NA	ACX60_RS02305	ABUW_0449	A1S_3043	KZA74_02305	7244.75	0.0513681	-0.661986	-1.42528	0.991879	0.837046	0.0326604
chromosome	KZA74_02540	516,525..517,364	840	=>	symmetrical bis(5'-nucleosyl)-tetraphosphatase	apaH	ACX60_RS02540	ABUW_0497	A1S_2997	KZA74_02540	740.883	-0.025127	-0.335231	0.669678	0.991879	0.837046	0.0345953
chromosome	KZA74_02625	533,939..535,132	1194	<=	KZA74_02625	NA	ACX60_RS02625	ABUW_0514	A1S_3863	KZA74_02625	433.98	0.0327502	0.364358	-0.206504	0.991879	0.837046	0.59215
chromosome	sbmA	734,787..735,980	1194	=>	sbmA, peptide antibiotic transporter SbmA	sbmA, bacA	ACX60_RS03560	ABUW_0707	A1S_2790	KZA74_03570	537.7	0.0136482	0.247809	-0.334165	0.991879	0.837046	0.171904
chromosome	mreC	746,217..747,074	858	=>	mreC, rod shape-determining protein MreC	mreC	ACX60_RS03610	ABUW_0716	A1S_2780	KZA74_03620	976.042	0.0276594	-0.444162	0.642875	0.991879	0.837046	0.0924174
chromosome	KZA74_03900	806,008..806,481	474	=>	tRNA (cytidine(34)-2'-O)-methyltransferase	trmL, cspR	ACX60_RS03890	ABUW_0854	A1S_2698	KZA74_03900	299.957	-0.0398078	-0.410841	0.565492	0.991879	0.837046	0.123852
chromosome	sdhA	821,349..823,184	1836	=>	sdhA, succinate dehydrogenase flavoprotein subunit	sdhA, frdA	ACX60_RS03975	ABUW_0870	A1S_2713	KZA74_03985	7260.4	-0.0978141	-1.21539	0.772714	0.991879	0.837046	0.37128
chromosome	KZA74_04060	849,071..850,795	1725	=>	CapA family protein	capA	ACX60_RS04040	ABUW_0887	A1S_2694	KZA74_04060	428.928	0.0233092	0.290295	0.00832869	0.991879	0.837046	0.97907
chromosome	gyrA	929,696..932,410	2715	=>	gyrA, DNA gyrase subunit A	gyrA	ACX60_RS04430	ABUW_0960	A1S_2626	KZA74_04450	6663.71	-0.0537453	-0.811216	1.29825	0.991879	0.837046	0.0474378
chromosome	purM	953,958..955,028	1071	<=	purM, phosphoribosylformylglycinamidine cyclo-ligase	purM	ACX60_RS04530	ABUW_0981	A1S_2605	KZA74_04555	2099.66	-0.0589511	-0.622579	1.49646	0.991879	0.837046	0.00273506
chromosome	purL	975,549..979,382	3834	=>	purL, phosphoribosylformylglycinamidine synthase	purL, PFAS	ACX60_RS04635	ABUW_1002	A1S_2585	KZA74_04660	7903.27	0.0511283	-0.858968	1.25877	0.991879	0.837046	0.042039
chromosome	KZA74_05140	ND	ND	ND	wecB, UDP-N-acetylglucosamine 2-epimerase(non-hydrolyzing)	NA	ACX60_RS05120	ABUW_1061	A1S_2489	KZA74_05140	300.575	-0.0350178	0.317918	-3.52399	0.991879	0.837046	2.96993e-29
chromosome	hemL	1,113,618..1,114,916	1299	=>	hemL, glutamate-1-semialdehyde 2,1-aminomutase	hemL	ACX60_RS05250	ABUW_1098	A1S_2464	KZA74_05275	1720.92	-0.0273125	-0.697986	0.545677	0.991879	0.837046	0.278627
chromosome	KZA74_05445	1,153,519..1,154,448	930	=>	LysR family transcriptional regulator	NA	ACX60_RS05420	ABUW_1132	A1S_2431	KZA74_05445	1327.56	-0.035208	-0.508112	1.14515	0.991879	0.837046	0.0121607
chromosome	efp	1,166,426..1,166,995	570	=>	efp, elongation factor P	efp	ACX60_RS05465	ABUW_1141	A1S_2419	KZA74_05490	2622.75	-0.0533935	-1.00744	1.13925	0.991879	0.837046	0.175952
chromosome	KZA74_05495	1,167,162..1,169,258	2097	=>	carbon starvation protein A	cstA	ACX60_RS05470	ABUW_1142	A1S_2417	KZA74_05495	4399.15	0.0435837	-0.805914	-1.07547	0.991879	0.837046	0.164978
chromosome	mnmG	1,424,603..1,426,483	1881	=>	mnmG, tRNA uridine-5-carboxymethylaminomethyl(34)synthesis enzyme MnmG	gidA, mnmG, MTO1	ACX60_RS06660	ABUW_1537	A1S_2182	KZA74_06690	3592.38	-0.055392	-0.726208	1.84989	0.991879	0.837046	3.5459e-05
chromosome	KZA74_06875	1,465,455..1,466,753	1299	=>	AarF/ABC1/UbiB kinase family protein	NA	ACX60_RS06845	ABUW_1577	A1S_2145	KZA74_06875	1410.72	-0.0465485	-0.497707	0.704585	0.991879	0.837046	0.130973
chromosome	coq7	1,478,106..1,478,741	636	<=	coq7, 2-polyprenyl-3-methyl-6-methoxy-1,4-benzoquinone monooxygenase	COQ7	ACX60_RS06895	ABUW_1588	A1S_2134	KZA74_06925	573.65	-0.0375847	-0.40818	0.0900352	0.991879	0.837046	0.816909
chromosome	KZA74_08300	1,746,158..1,747,309	1152	=>	phospholipase A	pldA	ACX60_RS08240	ABUW_1803	A1S_1919	KZA74_08300	1255.2	0.0522076	-0.481556	1.12278	0.991879	0.837046	0.0212617
chromosome	KZA74_08405	1,768,526..1,770,163	1638	=>	CTP synthase	pyrG, CTPS	ACX60_RS08345	ABUW_1825	A1S_1900	KZA74_08405	4760.61	-0.0780742	-0.927723	1.51046	0.991879	0.837046	0.0319871
chromosome	KZA74_09190	1,934,433..1,936,694	2262	<=	excinuclease ABC subunit UvrA	uvrA	ACX60_RS09135	NA	A1S_1749	KZA74_09190	348.345	-0.0418425	0.460376	-1.44797	0.991879	0.837046	0.000465515
chromosome	KZA74_10020	2,109,362..2,110,327	966	=>	AraC family transcriptional regulator	alkR	ACX60_RS09755	ABUW_2196	A1S_1640	KZA74_10020	197.479	0.0385971	0.345957	0.127336	0.991879	0.837046	0.705385
chromosome	hscA	2,117,368..2,119,227	1860	=>	hscA, Fe-S protein assembly chaperone HscA	hscA	ACX60_RS09805	ABUW_2206	A1S_1628	KZA74_10070	2263.15	-0.0493396	-0.752072	1.42787	0.991879	0.837046	0.00466748
chromosome	ychF	2,287,934..2,289,025	1092	=>	ychF, redox-regulated ATPase YchF	ychF	ACX60_RS10725	ABUW_2342	A1S_1481	KZA74_10995	826.217	0.0261193	-0.384052	1.50015	0.991879	0.837046	8.12327e-06
chromosome	KZA74_11685	2,435,455..2,436,651	1197	=>	reverse transcriptase	NA	ACX60_RS11400	NA	A1S_3653	KZA74_11685	108.599	0.0582637	0.635153	-0.689496	0.991879	0.837046	0.278839
chromosome	KZA74_11975	2,498,551..2,501,556	3006	<=	KZA74_11975	NA	ACX60_RS11690	NA	A1S_1290	KZA74_11975	1128.61	0.0233813	0.288357	-0.851904	0.991879	0.837046	0.0011779
chromosome	KZA74_11985	2,504,493..2,504,894	402	=>	KZA74_11985	NA	ACX60_RS11700	ABUW_2582	A1S_3646	KZA74_11985	92.3515	-0.0347865	0.582181	0.645843	0.991879	0.837046	0.122702
chromosome	KZA74_12165	2,544,997..2,545,686	690	<=	KZA74_12165	NA	ACX60_RS11875	NA	A1S_3639	KZA74_12165	111.994	-0.0313253	0.567065	-0.365555	0.991879	0.837046	0.440075
chromosome	KZA74_12280	2,569,300..2,569,375	76	=>	tRNA-Gly	trnG	ACX60_RS11995	ABUW_2678	A1S_1234	KZA74_12280	85.3789	-0.0323469	-0.560057	-1.17128	0.991879	0.837046	0.032404
chromosome	KZA74_13030	2,704,861..2,706,531	1671	=>	GMC family oxidoreductase	choD	ACX60_RS12750	ABUW_2770	A1S_1119	KZA74_13030	1315.7	-0.0266004	-0.459234	-0.107306	0.991879	0.837046	0.764037
chromosome	KZA74_13280	2,764,021..2,764,643	623	<=	KZA74_13280	NA	ACX60_RS13000	NA	NA	KZA74_13280	108.668	-0.048462	0.484769	-2.47796	0.991879	0.837046	3.73573e-08
chromosome	ssrS	2,815,436..2,815,620	185	=>	ssrS, 6S RNA	ssrS	NA	NA	NA	KZA74_13475	49143.8	-0.061921	-1.26552	-3.12564	0.991879	0.837046	0.000979291
chromosome	nfuA	2,879,582..2,880,220	639	<=	nfuA, Fe-S biogenesis protein NfuA	nfuA	ACX60_RS13475	ABUW_2917	A1S_0979	KZA74_13775	792.247	-0.0493293	-0.698149	1.06593	0.991879	0.837046	0.0369216
chromosome	tuf	3,005,803..3,006,993	1191	<=	tuf, elongation factor Tu	tuf, TUFM	ACX60_RS14035	ABUW_3060	A1S_0869	KZA74_14345	1646.37	0.0980834	-1.32495	3.46821	0.991879	0.837046	7.95636e-05
chromosome	rpsG	3,009,405..3,009,875	471	<=	rpsG, 30S ribosomal protein S7	RP-S7, MRPS7, rpsG	ACX60_RS14045	ABUW_3062	A1S_0867	KZA74_14355	13352.3	0.12435	-1.54113	2.39702	0.991879	0.837046	0.021613
chromosome	rnpB	3,028,981..3,029,335	355	<=	rnpB, RNase P RNA component class A	rnapB	NA	NA	NA	KZA74_14450	404045	0.0904691	-1.11977	-0.992279	0.991879	0.837046	0.388608
chromosome	rpmF	3,052,025..3,052,210	186	<=	rpmF, 50S ribosomal protein L32	RP-L32, MRPL32, rpmF	ACX60_RS14285	ABUW_3110	NA	KZA74_14600	4198.11	0.0679342	-0.95627	1.8551	0.991879	0.837046	0.0236181
chromosome	KZA74_15425	3,236,517..3,236,813	297	<=	ihfA, Integration host factor subunit alpha	ihfA, himA	ACX60_RS15105	ABUW_3279	A1S_0603	KZA74_15425	1742.58	0.0574168	-0.822641	-1.06081	0.991879	0.837046	0.141889
chromosome	acnA	3,280,835..3,283,591	2757	<=	acnA, aconitate hydratase AcnA	ACO, acnA	ACX60_RS15325	ABUW_3346	A1S_0558	KZA74_15650	10988.1	-0.0747171	-0.901026	-0.45589	0.991879	0.837046	0.622188
chromosome	KZA74_16020	3,366,518..3,368,044	1527	=>	fumarate hydratase	E4.2.1.2A, fumA, fumB	ACX60_RS15695	ABUW_3397	A1S_0480	KZA74_16020	3894.92	0.0359073	-0.894569	1.21871	0.991879	0.837046	0.0552815
chromosome	rplK	3,585,145..3,585,573	429	<=	rplK, 50S ribosomal protein L11	RP-L11, MRPL11, rplK	ACX60_RS16675	ABUW_3594	A1S_0283	KZA74_17005	10565.7	-0.105211	-1.49215	1.97088	0.991879	0.837046	0.0688158
chromosome	gpmI	3,631,223..3,632,770	1548	<=	gpmI, 2,3-bisphosphoglycerate-independentphosphoglycerate mutase	gpmI	ACX60_RS16920	ABUW_3643	A1S_0230	KZA74_17250	2112.12	-0.021353	-0.432472	0.994136	0.991879	0.837046	0.00314509
chromosome	lptF	3,633,966..3,635,066	1101	<=	lptF, LPS export ABC transporter permease LptF	lptF	ACX60_RS16930	ABUW_3645	A1S_0228	KZA74_17260	1267.49	0.0276752	-0.284973	0.852934	0.991879	0.837046	0.00315109
chromosome	guaA	3,731,594..3,733,162	1569	<=	guaA, glutamine-hydrolyzing GMP synthase	guaA, GMPS	ACX60_RS17420	ABUW_3755	A1S_0130	KZA74_17755	4973.44	-0.0504541	-0.914788	1.42461	0.991879	0.837046	0.0312833
chromosome	lspA	3,861,818..3,862,348	531	=>	lspA, signal peptidase II	lspA	ACX60_RS17980	ABUW_3863	A1S_0019	KZA74_18335	769.868	-0.0471219	-0.636515	0.930936	0.991879	0.837046	0.0758797
chromosome	yidC	3,898,796..3,900,556	1761	<=	yidC, membrane protein insertase YidC	yidC, spoIIIJ, OXA1, ccfA	ACX60_RS18175	ABUW_3903	A1S_2980	KZA74_18525	6446.19	0.0793143	-1.07316	1.95791	0.991879	0.837046	0.00864814
chromosome	yidD	3,900,562..3,900,882	321	<=	yidD, membrane protein insertion efficiency factorYidD	yidD, K08998	ACX60_RS18180	ABUW_3904	A1S_2982	KZA74_18530	693.172	-0.0335064	-0.85789	1.31456	0.991879	0.837046	0.0116141
pAB3	KZA74_18890	65,554..66,345	792	=>	KZA74_18890	NA	NA	NA	A1S_0630	KZA74_18890	715.103	-0.0597134	-0.790102	1.60697	0.991879	0.837046	0.00115093
pAB3	KZA74_18955	82,866..83,207	342	=>	KZA74_18955	NA	NA	NA	NA	KZA74_18955	583.108	0.0524835	-1.01486	0.803969	0.991879	0.837046	0.349871
pAB1	KZA74_19315	2897..3415	519	<=	sel1 repeat family protein	NA	NA	NA	NA	KZA74_19315	624.309	-0.0395874	0.604759	0.206407	0.991879	0.837046	0.70614
pAB1	KZA74_19370	11,491..11,634	144	=>	KZA74_19370	NA	NA	NA	NA	KZA74_19370	269.606	0.0340238	1.05016	-0.266737	0.991879	0.837046	0.681158
chromosome	KZA74_03070	627,934..628,317	384	=>	RcnB family protein	NA	ACX60_RS03065	ABUW_0603	A1S_2889	KZA74_03070	459.358	0.0283304	1.43829	1.96564	0.992114	0.837046	0.000128913
chromosome	sdhC	820,570..820,971	402	=>	sdhC, succinate dehydrogenase, cytochrome b556subunit	sdhC, frdC	ACX60_RS03965	ABUW_0868	A1S_2711	KZA74_03975	1224.87	0.0353914	-0.933522	1.24317	0.992114	0.837046	0.0580086
chromosome	KZA74_04440	927,631..928,380	750	=>	electron transfer flavoprotein subunit beta/FixAfamily protein	fixA, etfB	ACX60_RS04420	ABUW_0958	A1S_2628	KZA74_04440	7143.11	-0.0510824	-1.08851	1.4372	0.992114	0.837046	0.14348
chromosome	KZA74_08220	1,730,635..1,730,994	360	=>	KZA74_08220	NA	ACX60_RS08160	ABUW_1787	A1S_1932	KZA74_08220	3536.64	-0.0452864	-1.1079	-0.412866	0.992114	0.837046	0.685996
chromosome	KZA74_11230	ND	ND	ND	cydB, cytochrome d ubiquinol oxidase subunit II	cydB	ACX60_RS10960	ABUW_2390	A1S_1433	KZA74_11230	766.213	-0.0146145	-0.499692	-1.73939	0.992114	0.837046	7.68887e-10
chromosome	cysM	3,262,714..3,263,628	915	<=	cysM, cysteine synthase CysM	cysM	ACX60_RS15240	ABUW_3305	A1S_0575	KZA74_15560	874.075	-0.0197267	-0.395465	1.035	0.992114	0.837046	0.00435198
chromosome	KZA74_16545	3,475,610..3,475,990	381	<=	KZA74_16545	NA	ACX60_RS16220	NA	A1S_3496	KZA74_16545	79.3623	0.0377887	0.759409	-0.131507	0.992114	0.837046	0.861046
chromosome	ahcY	1,266,044..1,267,426	1383	<=	ahcY, adenosylhomocysteinase	E3.3.1.1, ahcY	ACX60_RS05860	ABUW_1224	A1S_2334	KZA74_05890	3045.52	-0.0301	-0.982834	1.71288	0.992282	0.837046	0.0080173
chromosome	KZA74_11675	2,432,943..2,433,569	627	<=	MFS transporter	NA	ACX60_RS11390	ABUW_2519	A1S_3654	KZA74_11675	100.657	-0.0197748	0.42531	-0.988061	0.993469	0.837046	0.0227529
chromosome	KZA74_05195	1,096,074..1,098,311	2238	=>	NADP-dependent isocitrate dehydrogenase	IDH1, IDH2, icd	ACX60_RS05175	ABUW_1072	A1S_2477	KZA74_05195	10491.5	-0.0357545	-1.05887	1.35598	0.993625	0.837046	0.118023
chromosome	KZA74_14535	3,041,585..3,042,535	951	=>	ribose-phosphate pyrophosphokinase	prs, PRPS, prsA	ACX60_RS14220	ABUW_3097	A1S_0829	KZA74_14535	3937.22	-0.0256935	-0.833813	2.21209	0.993625	0.837046	0.00021264
chromosome	KZA74_00685	148,578..149,345	768	=>	transporter	tp	ACX60_RS00705	ABUW_0135	A1S_3348	KZA74_00685	1340.03	0.019296	-0.589272	1.38656	0.994359	0.837046	0.0045498
chromosome	KZA74_02570	521,382..523,007	1626	<=	clsC_1, phospholipase D family protein	clsC	ACX60_RS02570	ABUW_0503	A1S_3874	KZA74_02570	672.272	-0.0106073	0.27812	1.40345	0.995742	0.837046	2.44109e-07
chromosome	typA	686,499..688,334	1836	=>	typA, translational GTPase TypA	typA, bipA	ACX60_RS03325	ABUW_0655	A1S_2835	KZA74_03330	7103.79	0.0237858	-0.88851	2.58064	0.995742	0.837046	6.78431e-05
pAB2	KZA74_19450	9722..10,093	372	<=	KZA74_19450	NA	NA	NA	NA	KZA74_19450	396.946	0.0136571	0.658811	-0.759688	0.996199	0.837046	0.0659377
chromosome	rplD	441,852..442,454	603	=>	rplD, 50S ribosomal protein L4	RP-L4, MRPL4, rplD	ACX60_RS02100	ABUW_0407	A1S_3079	KZA74_02100	8202.26	0.0300276	-1.63749	2.37052	0.996314	0.837046	0.0093477
chromosome	KZA74_00115	27,155..27,298	144	=>	methionine/alanine import family NSS transportersmall subunit	NA	ACX60_RS00115	ABUW_0023	NA	KZA74_00115	812.194	-0.0237739	-0.782943	-3.04083	0.996531	0.837046	2.51892e-05
chromosome	cgtA	1,073,272..1,074,492	1221	=>	cgtA, Obg family GTPase CgtA	obgE, cgtA	ACX60_RS05080	ABUW_1053	A1S_2498	KZA74_05100	2099.51	0.01514	-0.608027	-0.430636	0.997025	0.837046	0.427355
chromosome	KZA74_06385	1,367,981..1,368,784	804	=>	protein kinase	NA	ACX60_RS06355	ABUW_1457	A1S_2240	KZA74_06385	184.859	-0.00973703	0.311205	-0.858321	0.997025	0.837046	0.00711565
pAB3	KZA74_18885	64,530..65,576	1047	=>	KZA74_18885	NA	NA	NA	A1S_3523	KZA74_18885	450.584	0.0141891	-0.81153	1.43126	0.998314	0.837046	0.00604566
chromosome	pdxH	183,451..184,107	657	=>	pdxH, pyridoxamine 5'-phosphate oxidase	pdxH, PNPO	ACX60_RS00855	ABUW_0164	A1S_3319	KZA74_00835	855.181	-0.000487933	-0.342594	0.284395	0.999942	0.837046	0.415028
chromosome	rplQ	454,015..454,392	378	=>	rplQ, 50S ribosomal protein L17	RP-L17, MRPL17, rplQ	ACX60_RS02225	ABUW_0432	A1S_3055	KZA74_02225	6436.28	-0.023235	-1.40251	1.43263	0.999942	0.837046	0.198515
chromosome	KZA74_02835	578,100..578,429	330	=>	KZA74_02835	NA	ACX60_RS02830	NA	NA	KZA74_02835	56.1986	0.00297033	0.532894	0.423781	0.999942	0.837046	0.363102
chromosome	KZA74_03630	747,540..748,100	561	=>	Maf-like protein	maf	ACX60_RS03620	ABUW_0718	A1S_2778	KZA74_03630	298.819	-0.00547331	-0.353015	0.472428	0.999942	0.837046	0.0789578
chromosome	dapF	924,589..925,434	846	=>	dapF, diaminopimelate epimerase	dapF	ACX60_RS04405	ABUW_0954	A1S_2631	KZA74_04425	1076.07	-0.0021968	-0.644066	0.292603	0.999942	0.837046	0.563399
chromosome	KZA74_05860	1,256,349..1,257,524	1176	=>	trypsin-like peptidase domain-containingprotein	hhoB, degS	ACX60_RS05830	ABUW_1218	A1S_2340	KZA74_05860	1066.83	-0.0024746	-0.40292	-0.00908389	0.999942	0.837046	0.982164
chromosome	KZA74_06160	1,323,648..1,324,556	909	=>	NAD(+) kinase	ppnK, NADK	ACX60_RS06130	ABUW_1359	A1S_2283	KZA74_06160	1318.31	0.00617923	-0.442518	1.23346	0.999942	0.837046	0.00164658
chromosome	eno	1,771,098..1,772,387	1290	=>	eno, phosphopyruvate hydratase	ENO, eno	ACX60_RS08355	ABUW_1827	A1S_1898	KZA74_08415	2927.9	0.0154157	-0.946962	1.84508	0.999942	0.837046	0.012043
chromosome	tkt	2,243,365..2,245,353	1989	<=	tkt, transketolase	E2.2.1.1, tktA, tktB	ACX60_RS10500	ABUW_2295	A1S_1520	KZA74_10770	4666.69	-0.00183029	-0.900217	1.16265	0.999942	0.837046	0.0901191
chromosome	KZA74_11190	2,330,091..2,330,885	795	<=	ATP-binding cassette domain-containing protein	tauB	ACX60_RS10920	ABUW_2381	A1S_1443	KZA74_11190	348.385	0.00751663	-0.404683	0.603126	0.999942	0.837046	0.121871
chromosome	KZA74_11840	2,468,216..2,468,503	288	<=	KZA74_11840	NA	ACX60_RS11555	ABUW_2556	NA	KZA74_11840	37.6151	-0.00557251	0.834538	-0.93464	0.999942	0.837046	0.113116
chromosome	trxB	3,000,364..3,001,311	948	=>	trxB, thioredoxin-disulfide reductase	trxB, TRR	ACX60_RS14005	ABUW_3054|ABUW_3672	A1S_0875	KZA74_14315	1434.13	0.00282622	-0.503874	0.983653	0.999942	0.837046	0.0549413
chromosome	rpsL	3,010,035..3,010,409	375	<=	rpsL, 30S ribosomal protein S12	RP-S12, MRPS12, rpsL	ACX60_RS14050	ABUW_3063	A1S_0866	KZA74_14360	11505.6	0.0156477	-1.34131	2.37315	0.999942	0.837046	0.020517
chromosome	KZA74_16540	3,473,811..3,475,523	1713	=>	electron transfer flavoprotein-ubiquinoneoxidoreductase	ETFDH	ACX60_RS16215	ABUW_3502	A1S_0378	KZA74_16540	4171.53	0.0117584	-0.881386	1.23104	0.999942	0.837046	0.079801
chromosome	KZA74_16595	3,486,338..3,487,213	876	=>	hslO, Hsp33 family molecular chaperone HslO	hslO	ACX60_RS16270	ABUW_3513	A1S_0366	KZA74_16595	1663.51	-0.00964533	-0.6009	1.05622	0.999942	0.837046	0.0572728
chromosome	nusG	3,585,682..3,586,215	534	<=	nusG, transcription termination/antiterminationprotein NusG	nusG	ACX60_RS16680	ABUW_3595	A1S_0282	KZA74_17010	4875.02	0.0118974	-0.860511	2.54465	0.999942	0.837046	0.000345315
chromosome	KZA74_17970	3,782,077..3,782,553	477	<=	KZA74_17970	NA	ACX60_RS17635	NA	NA	KZA74_17970	57.943	0.0036826	0.723988	-1.48785	0.999942	0.837046	0.0334197
pAB3	KZA74_19050	99,753..100,571	819	<=	DotD/TraH family lipoprotein	NA	NA	NA	A1S_3535	KZA74_19050	183.364	0.00562778	-0.509912	1.73515	0.999942	0.837046	0.000328466
chromosome	gshB	159,875..160,819	945	=>	gshB, glutathione synthase	gshB	ACX60_RS00760	ABUW_0145	A1S_3337	KZA74_00740	566.513	-0.494443	-0.221173	0.0334248	0.518695	0.837271	0.896825
chromosome	KZA74_01635	344,555..345,028	474	=>	gspH, fimT pseudopilin	fimU, fimT, gspH	ACX60_RS01640	ABUW_0313	A1S_3883	KZA74_01635	80.8648	0.463699	0.66346	-3.83672	0.973209	0.837271	5.57077e-08
chromosome	KZA74_02385	485,863..487,806	1944	=>	lytic transglycosylase domain-containingprotein	slt	ACX60_RS02385	ABUW_0465	A1S_3027	KZA74_02385	2536.22	-0.457168	-0.510548	0.259005	0.973209	0.837271	0.654742
chromosome	KZA74_03680	758,319..759,119	801	<=	PaaX family transcriptional regulator	paaX	ACX60_RS03670	ABUW_0728	A1S_2769	KZA74_03680	355.977	0.392763	0.445194	1.21168	0.973209	0.837271	0.00767089
chromosome	KZA74_06175	1,326,539..1,327,897	1359	=>	dicarboxylate/amino acid:cation symporter	dctA	ACX60_RS06145	ABUW_1362	A1S_2280	KZA74_06175	1150.91	0.499193	-0.475016	0.483841	0.973209	0.837271	0.347046
chromosome	ftsY	1,731,529..1,732,635	1107	=>	ftsY, signal recognition particle-docking proteinFtsY	ftsY	ACX60_RS08170	ABUW_1789	A1S_1930	KZA74_08230	1622.25	0.332481	-0.489724	0.504056	0.973209	0.837271	0.340329
chromosome	KZA74_11830	2,466,979..2,467,413	435	<=	DUF333 domain-containing protein	K09712	ACX60_RS11545	ABUW_2554	A1S_1321	KZA74_11830	761.06	-0.44423	-0.662498	0.711462	0.973209	0.837271	0.320574
chromosome	KZA74_14060	2,945,336..2,945,806	471	=>	KZA74_14060	NA	ACX60_RS13755	ABUW_2974	A1S_3579	KZA74_14060	139.213	0.312008	0.577969	-0.241589	0.973209	0.837271	0.711749
chromosome	KZA74_15315	3,212,138..3,213,674	1537	<=	16S ribosomal RNA	16s	NA	NA	A1S_r	KZA74_15315	49.6088	1.00099	-0.919301	-4.41508	0.973209	0.837271	8.64159e-06
chromosome	KZA74_16750	3,528,706..3,528,782	77	<=	tRNA-Met	trnM	NA	NA	A1S_0333	KZA74_16750	414.341	0.494215	-0.447042	1.53665	0.973209	0.837271	0.000651407
chromosome	KZA74_01130	247,526..247,840	315	=>	yybR, transcriptional regulator	yybR	ACX60_RS01145	ABUW_0224	A1S_3262	KZA74_01130	70.6507	0.203075	0.502723	-1.55598	0.97575	0.837271	0.00292029
chromosome	KZA74_04230	882,435..883,397	963	=>	MBL fold metallo-hydrolase	NA	ACX60_RS04210	ABUW_0920	A1S_2662	KZA74_04230	1454.05	-0.192337	-0.475219	0.932263	0.97575	0.837271	0.0610267
chromosome	KZA74_17710	3,722,532..3,724,229	1698	<=	NAD-dependent malic enzyme	ME2, sfcA, maeA	ACX60_RS17375	ABUW_3746	A1S_0140	KZA74_17710	3835.77	-0.294352	-0.651114	1.2572	0.97575	0.837271	0.0655424
chromosome	hisH	270,929..271,546	618	<=	hisH, imidazole glycerol phosphate synthase subunitHisH	hisH	ACX60_RS01305	ABUW_0249	A1S_3235	KZA74_01290	685.899	0.108763	-0.334515	0.77814	0.978617	0.837271	0.0243601
chromosome	KZA74_00855	188,308..188,610	303	=>	arsR fam transcriptional regulator	arsR	ACX60_RS00875	ABUW_0169	A1S_3315	KZA74_00855	333.649	0.111655	-0.359839	1.05814	0.978912	0.837271	0.00377222
chromosome	KZA74_17430	3,666,797..3,668,476	1680	<=	long-chain-fatty-acid--CoA ligase	ACSL, fadD	ACX60_RS17095	ABUW_3689	A1S_0196	KZA74_17430	4917.22	0.177116	-0.76405	1.02233	0.986689	0.837271	0.212535
chromosome	KZA74_14210	2,979,437..2,980,555	1119	=>	pilU, PilT/PilU family type 4a pilus ATPase	pilU	ACX60_RS13900	ABUW_3032	A1S_0896	KZA74_14210	1975.72	3.99671	0.840719	-2.79875	0.000322329	0.837894	0.00208281
chromosome	KZA74_10835	2,255,681..2,256,031	351	<=	KZA74_10835	NA	ACX60_RS10565	ABUW_2309	NA	KZA74_10835	119.793	3.01684	0.659991	1.72165	0.000583495	0.837894	0.0158328
chromosome	pcaD	1,779,132..1,779,917	786	=>	pcaD, 3-oxoadipate enol-lactonase	pcaD	ACX60_RS08395	ABUW_1835	A1S_1889	KZA74_08455	323.89	-1.59465	-0.459333	-2.60817	0.0495949	0.837894	5.82371e-08
chromosome	KZA74_01910	402,055..402,852	798	=>	TIGR03915 family putative DNA repair protein	NA	ACX60_RS01915	ABUW_0370	A1S_3115	KZA74_01910	335.188	1.42737	0.45516	-0.35562	0.101979	0.837894	0.50183
pAB3	KZA74_18775	40,567..40,851	285	=>	TetR/AcrR family transcriptional regulator	NA	NA	NA	A1S_0625	KZA74_18775	104.938	0.891361	0.313165	1.2041	0.202902	0.837894	0.000167202
chromosome	yfcF	2,360,462..2,361,088	627	=>	yfcF, glutathione transferase	GST, gst	ACX60_RS11070	ABUW_2410	A1S_1412	KZA74_11340	284.753	-0.445359	-0.205233	0.538994	0.696595	0.837894	0.0118087
chromosome	KZA74_08585	1,805,134..1,806,411	1278	=>	aromatic ring-hydroxylating dioxygenase subunitalpha	antA	ACX60_RS08525	ABUW_1861	A1S_1860	KZA74_08585	1207.28	-1.4473	-0.720983	-4.55092	0.720134	0.837894	3.81584e-10
chromosome	KZA74_14140	2,961,542..2,963,527	1986	<=	gamma-glutamyltransferase family protein	ggt	ACX60_RS13830	ABUW_3018	A1S_0910	KZA74_14140	1307.34	-0.788088	-0.416692	-1.17948	0.816777	0.837894	0.00614602
chromosome	KZA74_14525	3,041,308..3,041,382	75	=>	tRNA-Gln	trnQ	NA	NA	A1S_0830	KZA74_14525	104.109	0.71604	0.361459	0.624114	0.860509	0.837894	0.119206
chromosome	KZA74_08010	1,690,243..1,690,746	504	=>	OmpH family outer membrane protein	hlpA, ompH	ACX60_RS07960	ABUW_1743	A1S_1968	KZA74_08010	1457.14	-1.36789	-0.75169	0.783349	0.934586	0.837894	0.359129
chromosome	maiA	73,137..73,769	633	<=	maiA, maleylacetoacetate isomerase	maiA, GSTZ1	ACX60_RS00340	ABUW_0069	A1S_3415	KZA74_00345	1362.02	-1.11866	-0.800147	-3.12379	0.973209	0.837894	0.000124149
chromosome	KZA74_00760	164,581..165,435	855	=>	ftsQ, cell division protein FtsQ/DivIB	ftsQ	ACX60_RS00780	ABUW_0149	A1S_3333	KZA74_00760	1254.84	-0.623018	-0.383756	0.60155	0.973209	0.837894	0.152196
chromosome	KZA74_01325	275,292..275,384	93	<=	KZA74_01325	NA	NA	NA	NA	KZA74_01325	25.0702	0.517207	0.698885	-4.36637	0.973209	0.837894	2.49657e-06
chromosome	KZA74_01345	280,994..283,183	2190	=>	sulP, sulfate permease	cynT, can, sulP	ACX60_RS01355	ABUW_0259	A1S_3225	KZA74_01345	1952.98	-1.11644	-0.71655	-0.846146	0.973209	0.837894	0.278821
chromosome	KZA74_02005	422,757..423,338	582	=>	yvdD_1, TIGR00730 family Rossman fold protein	ppnN	ACX60_RS02010	ABUW_0389	A1S_3097	KZA74_02005	636.754	-0.284013	-0.413527	0.0360946	0.973209	0.837894	0.943639
chromosome	plsB	428,376..430,949	2574	<=	plsB, glycerol-3-phosphate 1-O-acyltransferase PlsB	plsB	ACX60_RS02040	ABUW_0395	A1S_3091	KZA74_02035	2449.36	-0.256559	-0.341268	1.44734	0.973209	0.837894	2.76719e-05
chromosome	KZA74_02230	454,574..456,064	1491	=>	mymA, NAD(P)/FAD-dependent oxidoreductase	mymA	ACX60_RS02230	ABUW_0433|ABUW_1978	A1S_3054	KZA74_02230	894.967	-0.246709	-0.333085	0.632232	0.973209	0.837894	0.0729204
chromosome	rnr	466,040..468,457	2418	<=	rnr, ribonuclease R	rnr, vacB	ACX60_RS02280	ABUW_0444	A1S_3045	KZA74_02280	2234.32	-0.213603	-0.276637	1.02037	0.973209	0.837894	0.000406706
chromosome	KZA74_02655	538,745..539,731	987	<=	KZA74_02655	NA	ACX60_RS02660	NA	A1S_3861	KZA74_02655	225.87	0.254402	0.438391	-0.725313	0.973209	0.837894	0.143161
chromosome	KZA74_02975	606,350..606,565	216	<=	KZA74_02975	NA	ACX60_RS02970	ABUW_0550	A1S_3842	KZA74_02975	53.3534	0.433356	0.494661	-2.92983	0.973209	0.837894	5.68547e-08
chromosome	KZA74_03050	622,614..623,378	765	<=	znuC	znuC	ACX60_RS03045	ABUW_0599	A1S_2893	KZA74_03050	257.884	0.517918	0.593431	-0.685617	0.973209	0.837894	0.314678
chromosome	baeS	633,510..635,168	1659	=>	baeS, sensor histidine kinase efflux regulator BaeS	baeS, smeS	ACX60_RS03090	ABUW_0608	A1S_2884	KZA74_03095	972.264	-0.293358	-0.238356	0.153992	0.973209	0.837894	0.569813
chromosome	KZA74_03280	676,419..676,772	354	=>	quaternary ammonium transporter	emrE, qac, mmr, smr	ACX60_RS03275	ABUW_0645	A1S_2844	KZA74_03280	99.5224	0.349194	0.46075	-1.78761	0.973209	0.837894	0.00030435
chromosome	mscL	688,590..689,021	432	=>	mscL, large conductance mechanosensitive channelprotein MscL	mscL	ACX60_RS03330	ABUW_0656	A1S_2834	KZA74_03335	965.65	-0.570398	-0.524395	1.43137	0.973209	0.837894	0.00954268
chromosome	KZA74_03665	755,281..755,979	699	<=	NAD(P)H-dependent oxidoreductase	NQO1	ACX60_RS03655	ABUW_0725	A1S_2772	KZA74_03665	224.929	0.308125	0.318739	-2.12994	0.973209	0.837894	3.33057e-10
chromosome	KZA74_03755	773,105..774,409	1305	=>	porin	NA	ACX60_RS03745	ABUW_0826	A1S_2753	KZA74_03755	7067.09	-0.990212	-0.891566	-0.324834	0.973209	0.837894	0.764037
chromosome	KZA74_04075	851,975..852,412	438	<=	usp, universal stress protein	usp	ACX60_RS04055	ABUW_0890	A1S_2692	KZA74_04075	609.112	-0.608302	-0.586159	0.0258174	0.973209	0.837894	0.971067
chromosome	KZA74_04585	962,178..962,498	321	<=	KZA74_04585	NA	ACX60_RS04560	ABUW_0987	A1S_2599	KZA74_04585	914.104	-0.867958	-0.557655	1.16254	0.973209	0.837894	0.0499412
chromosome	KZA74_04830	1,024,718..1,025,527	810	<=	heteromeric transposase endonuclease subunitTnsA	tnsA	ACX60_RS04815	NA	A1S_2550	KZA74_04830	202.068	0.865334	0.56076	0.0631447	0.973209	0.837894	0.927142
chromosome	rarD	1,068,864..1,069,811	948	=>	rarD, EamA family transporter RarD	rarD	ACX60_RS05060	ABUW_1049	A1S_2502	KZA74_05080	342.604	0.391963	0.424332	-1.41629	0.973209	0.837894	0.00181898
chromosome	KZA74_05865	1,257,574..1,258,812	1239	<=	multifunctional CCA addition/repair protein	cca	ACX60_RS05835	ABUW_1219	A1S_2339	KZA74_05865	1288.39	-0.25147	-0.282177	1.08847	0.973209	0.837894	0.000199516
chromosome	KZA74_06025	1,293,649..1,294,878	1230	=>	lipase family protein	NA	ACX60_RS06000	ABUW_1332	A1S_2308	KZA74_06025	476.176	-0.341306	-0.275457	-1.75971	0.973209	0.837894	4.79211e-10
chromosome	KZA74_06305	1,351,658..1,352,113	456	=>	histidine phosphatase family protein	sixA	ACX60_RS06275	ABUW_1382	A1S_2256	KZA74_06305	342.639	-0.398868	-0.291733	0.321518	0.973209	0.837894	0.332864
chromosome	KZA74_06345	1,359,740..1,360,705	966	=>	D-glycerate dehydrogenase	ghrB	ACX60_RS06315	ABUW_1449	A1S_2248	KZA74_06345	949.718	-0.475098	-0.401601	0.630077	0.973209	0.837894	0.153774
chromosome	KZA74_06505	1,387,246..1,387,884	639	<=	TetR/AcrR family transcriptional regulator	NA	ACX60_RS06475	ABUW_1486	A1S_3796	KZA74_06505	53.5433	0.929139	0.655518	-4.97669	0.973209	0.837894	4.38323e-09
chromosome	KZA74_06710	1,430,276..1,431,055	780	=>	transglutaminase family protein	NA	ACX60_RS06680	ABUW_1542	A1S_2178	KZA74_06710	525.369	-0.545406	-0.36985	0.203157	0.973209	0.837894	0.631974
chromosome	KZA74_06935	1,480,233..1,482,953	2721	=>	BamA/TamA family outer membrane protein	tamA	ACX60_RS06905	ABUW_1590	A1S_2132	KZA74_06935	3038.94	-0.434232	-0.431691	0.754523	0.973209	0.837894	0.119206
chromosome	KZA74_07365	1,578,663..1,579,901	1239	=>	lactonase family protein	pgl	ACX60_RS07330	ABUW_1685	A1S_2052	KZA74_07365	881.147	-0.424863	-0.451353	-0.60927	0.973209	0.837894	0.225191
chromosome	KZA74_07925	1,672,624..1,673,868	1245	=>	D-amino acid dehydrogenase	dadA	ACX60_RS07875	ABUW_1726	A1S_1984	KZA74_07925	7343.72	-0.467926	-0.847539	-1.56473	0.973209	0.837894	0.0902835
chromosome	lpxA	1,692,310..1,693,098	789	=>	lpxA, acyl-ACP--UDP-N-acetylglucosamineO-acyltransferase	lpxA	NA	NA	A1S_1965	KZA74_08025	1789.8	-0.357508	-0.626174	1.00791	0.973209	0.837894	0.1491
chromosome	KZA74_08370	1,761,612..1,762,172	561	<=	PadR family transcriptional regulator	padR	ACX60_RS08310	ABUW_1818	A1S_1906	KZA74_08370	178.105	-0.604257	-0.358052	-0.287975	0.973209	0.837894	0.466501
chromosome	KZA74_08490	1,785,551..1,786,870	1320	=>	carbohydrate porin	quiB, oprB	ACX60_RS08430	ABUW_1842	A1S_1881	KZA74_08490	399.512	-0.598392	-0.399475	-2.72278	0.973209	0.837894	2.96271e-11
chromosome	KZA74_08835	1,860,286..1,860,747	462	=>	KZA74_08835	NA	ACX60_RS08780	NA	A1S_3733	KZA74_08835	120.097	0.436987	0.361075	0.259815	0.973209	0.837894	0.528715
chromosome	KZA74_09005	1,895,618..1,896,385	768	=>	NUDIX hydrolase	NA	ACX60_RS08950	ABUW_1944	A1S_1779	KZA74_09005	371.391	-0.280881	-0.320324	-0.597004	0.973209	0.837894	0.0782692
chromosome	pqqA	1,969,758..1,969,832	75	<=	pqqA, pyrroloquinoline quinone precursor peptide PqqA	pqqA	NA	NA	NA	KZA74_09355	271.298	-0.543937	-0.776107	-0.0757526	0.973209	0.837894	0.934806
chromosome	KZA74_09725	2,049,542..2,049,928	387	<=	YcgL domain-containing protein	NA	ACX60_RS09460	ABUW_2141	A1S_1689	KZA74_09725	805.652	-0.235893	-0.445592	1.18501	0.973209	0.837894	0.00989419
chromosome	cobT	2,082,171..2,083,226	1056	<=	cobT, nicotinate-nucleotide--dimethylbenzimidazole phosphoribosyltransferase	E2.4.2.21, cobU, cobT	ACX60_RS09645	ABUW_2174	A1S_1660	KZA74_09910	608.646	-0.337458	-0.232958	-0.672271	0.973209	0.837894	0.00570671
chromosome	KZA74_10495	2,192,213..2,192,578	366	<=	DUF1049 domain-containing protein	NA	ACX60_RS10225	ABUW_2240	A1S_1574	KZA74_10495	1612.29	-0.490488	-0.736073	0.910165	0.973209	0.837894	0.274309
chromosome	KZA74_10600	2,208,596..2,209,231	636	<=	MotA/TolQ/ExbB proton channel family protein	exbB	ACX60_RS10330	ABUW_2261	A1S_1553	KZA74_10600	308.417	0.135189	0.186696	-0.386126	0.973209	0.837894	0.0611576
chromosome	KZA74_10780	2,247,168..2,247,416	249	<=	KZA74_10780	NA	ACX60_RS10510	ABUW_2297	NA	KZA74_10780	646.939	-0.888095	-0.51757	-0.305998	0.973209	0.837894	0.603757
chromosome	KZA74_10790	2,247,923..2,248,483	561	<=	FxsA family protein	fxsA	ACX60_RS10520	ABUW_2299	A1S_1518	KZA74_10790	3082.31	-1.02973	-0.756532	-0.495855	0.973209	0.837894	0.559614
chromosome	KZA74_10805	2,250,320..2,250,913	594	<=	XRE family transcriptional regulator	NA	ACX60_RS10535	ABUW_2302	A1S_1515	KZA74_10805	157.361	-0.330654	-0.321446	-0.66625	0.973209	0.837894	0.0602463
chromosome	msrB	2,300,437..2,300,856	420	<=	msrB, peptide-methionine (R)-S-oxide reductase MsrB	msrB	ACX60_RS10795	ABUW_2356	A1S_1469	KZA74_11065	694.167	-0.330471	-0.514636	-0.430278	0.973209	0.837894	0.450984
chromosome	KZA74_11475	2,386,234..2,386,647	414	=>	KZA74_11475	hypothetical	ACX60_RS11190	ABUW_2434	NA	KZA74_11475	29.3958	0.414753	0.651808	-3.5271	0.973209	0.837894	4.91756e-06
chromosome	KZA74_11550	2,400,120..2,401,814	1695	<=	AMP-binding protein	K00666	ACX60_RS11265	ABUW_2450	A1S_1378	KZA74_11550	1904.51	-0.847696	-0.930382	-2.7601	0.973209	0.837894	0.00515882
chromosome	KZA74_11705	2,438,662..2,439,267	606	<=	gamma carbonic anhydrase family protein	paaY	ACX60_RS11420	ABUW_2524	A1S_1348	KZA74_11705	768.28	-0.698609	-0.67863	-1.7566	0.973209	0.837894	0.0131006
chromosome	icmH	2,476,658..2,477,464	807	<=	icmH, type IVB secretion system protein IcmH/DotU	impK, ompA, vasF, dotU	ACX60_RS11605	ABUW_2566	A1S_1310	KZA74_11890	193.79	0.280049	0.408807	-0.777688	0.973209	0.837894	0.0909071
chromosome	tssC	2,494,095..2,495,576	1482	<=	tssC, type VI secretion system contractile sheathlarge subunit	tssC, impC	ACX60_RS11670	ABUW_2579	A1S_1295	KZA74_11955	429.353	-0.214603	-0.278826	-0.264769	0.973209	0.837894	0.382525
chromosome	KZA74_12120	2,536,636..2,537,064	429	=>	GNAT family N-acetyltransferase	NA	ACX60_RS11835	ABUW_2620	A1S_1262	KZA74_12120	138.153	0.385364	0.400968	-1.00232	0.973209	0.837894	0.0224938
chromosome	KZA74_12175	2,546,531..2,547,463	933	<=	lauroyl acyltransferase	lpxL, htrB	ACX60_RS11885	ABUW_2630	A1S_1255	KZA74_12175	882.496	-0.394219	-0.277347	0.835055	0.973209	0.837894	0.00445022
chromosome	KZA74_12635	2,641,682..2,642,665	984	<=	KZA74_12635	tolA?	ACX60_RS12350	NA	A1S_3622	KZA74_12635	285.855	-0.238083	0.372097	0.745199	0.973209	0.837894	0.0715885
chromosome	KZA74_13110	2,724,341..2,725,054	714	<=	FadR family transcriptional regulator	fadR	ACX60_RS12830	ABUW_2786	A1S_1103	KZA74_13110	453.5	-0.237227	-0.316516	1.06498	0.973209	0.837894	0.00131776
chromosome	KZA74_13140	2,732,708..2,733,604	897	=>	DMT family transporter	NA	ACX60_RS12860	ABUW_2792	A1S_1097	KZA74_13140	294.613	0.483342	0.48659	-0.19979	0.973209	0.837894	0.728001
chromosome	KZA74_13435	2,809,028..2,809,429	402	=>	MerR family transcriptional regulator	NA	ACX60_RS13160	ABUW_2852	A1S_1043	KZA74_13435	73.3248	0.457386	0.454889	-0.638748	0.973209	0.837894	0.217383
chromosome	KZA74_13465	2,814,501..2,815,061	561	=>	KZA74_13465	prok_B	ACX60_RS13190	ABUW_2858	A1S_1037	KZA74_13465	654.695	-0.425096	-0.425156	1.31085	0.973209	0.837894	0.00465845
chromosome	KZA74_13920	2,915,882..2,916,403	522	<=	cupin domain-containing protein	NA	ACX60_RS13615	ABUW_2946	A1S_0953	KZA74_13920	258.549	-0.370848	-0.395011	-1.62745	0.973209	0.837894	0.000129251
chromosome	KZA74_14025	2,934,552..2,935,166	615	<=	MarC family protein	NA	ACX60_RS13720	ABUW_2967	A1S_0932	KZA74_14025	483.067	-0.282022	-0.291839	-0.452152	0.973209	0.837894	0.151796
chromosome	bamE	2,981,174..2,981,572	399	=>	bamE, outer membrane protein assembly factor BamE	bamE, smpA	ACX60_RS13910	ABUW_3034	A1S_0894	KZA74_14220	725.702	-0.511186	-0.45575	0.372803	0.973209	0.837894	0.465102
chromosome	KZA74_14240	2,983,878..2,984,726	849	<=	class II glutamine amidotransferase	NA	ACX60_RS13930	ABUW_3038	A1S_0890	KZA74_14240	556.09	-0.499591	-0.349924	0.669095	0.973209	0.837894	0.0826309
chromosome	KZA74_14370	3,012,232..3,013,461	1230	=>	beta-ketoacyl-ACP synthase II	fabB	ACX60_RS14060	ABUW_3065	A1S_0863	KZA74_14370	3426.91	-0.60588	-0.743819	-0.149826	0.973209	0.837894	0.868393
chromosome	KZA74_14470	3,030,773..3,031,324	552	<=	flavodoxin family protein	wrbA, fldP	ACX60_RS14155	ABUW_3084	A1S_0843	KZA74_14470	538.922	0.185719	-0.303483	0.76138	0.973209	0.837894	0.0153004
chromosome	KZA74_14685	3,068,641..3,069,678	1038	<=	zipA, cell division protein ZipA	zipA	ACX60_RS14370	ABUW_3128	A1S_0798	KZA74_14685	1285.2	-0.218952	-0.39091	0.522738	0.973209	0.837894	0.234065
chromosome	KZA74_14770	3,090,359..3,091,231	873	<=	5'-methylthioadenosine/S-adenosylhomocysteine nucleosidase	mtnN, mtn, pfs	ACX60_RS14455	ABUW_3145	A1S_0781	KZA74_14770	334.711	0.28782	0.353917	-1.26556	0.973209	0.837894	0.000573854
chromosome	KZA74_14825	3,102,536..3,102,706	171	<=	KZA74_14825		ACX60_RS14510	ABUW_3156	NA	KZA74_14825	199.716	-0.543817	-0.536246	1.54003	0.973209	0.837894	0.00520085
chromosome	KZA74_14955	3,129,529..3,132,363	2835	=>	nrdA, ribonucleoside-diphosphate reductase subunitalpha	E1.17.4.1A, nrdA, nrdE	ACX60_RS14640	ABUW_3183	A1S_0747	KZA74_14955	17113.1	1.31256	-0.922376	1.86192	0.973209	0.837894	0.0664949
chromosome	filE	3,193,327..3,194,670	1344	<=	filE, putative pilus assembly protein FilE	filE	ACX60_RS14915	ABUW_3241	A1S_0694	KZA74_15230	323.777	-0.276495	0.428347	-1.31227	0.973209	0.837894	0.00435344
chromosome	gigB	3,216,332..3,216,853	522	=>	gigB, anti-anti-sigma factor GigB	gigB	ACX60_RS15015	ABUW_3261	A1S_0620	KZA74_15330	1972.13	-0.71665	-0.644505	1.38375	0.973209	0.837894	0.0474378
chromosome	ilvN	3,301,687..3,302,178	492	<=	ilvN, acetolactate synthase small subunit	E2.2.1.6S, ilvH, ilvN	ACX60_RS15395	ABUW_3356	A1S_0544	KZA74_15720	1213.69	-0.60652	-0.709515	1.14488	0.973209	0.837894	0.13665
chromosome	clpX	3,369,629..3,370,942	1314	<=	clpX, ATP-dependent Clp protease ATP-binding subunitClpX	clpX, CLPX	ACX60_RS15710	ABUW_3400	A1S_0477	KZA74_16035	5918.12	-0.594012	-0.670709	0.887268	0.973209	0.837894	0.236747
chromosome	clpP	3,371,044..3,371,649	606	<=	clpP, ATP-dependent Clp endopeptidase proteolyticsubunit ClpP	clpP, CLPP	ACX60_RS15715	ABUW_3401	A1S_0476	KZA74_16040	1701.81	-0.464635	-0.58323	1.01649	0.973209	0.837894	0.103565
chromosome	KZA74_16475	3,463,257..3,464,555	1299	=>	ubiB, protein kinase, AarF/ABC1/UbiB kinase family protein	ubiB	ACX60_RS16150	ABUW_3489	A1S_0392	KZA74_16475	966.535	-0.310696	-0.226196	0.487906	0.973209	0.837894	0.0472399
chromosome	KZA74_16950	3,569,473..3,570,054	582	<=	outer membrane beta-barrel protein	ompW	ACX60_RS16620	ABUW_3583	A1S_0292	KZA74_16950	19330.3	-1.11941	-0.861261	0.282192	0.973209	0.837894	0.778935
chromosome	cpdA	3,612,516..3,613,328	813	=>	cpdA, 3',5'-cyclic-AMP phosphodiesterase	cpdA	ACX60_RS16835	ABUW_3626	A1S_0249	KZA74_17165	436.909	0.215336	0.262541	0.693271	0.973209	0.837894	0.0145991
chromosome	KZA74_17410	3,663,834..3,665,108	1275	=>	OprD family porin	oprD	ACX60_RS17075	ABUW_3685	A1S_0201	KZA74_17410	4170.25	-0.735874	-0.661624	1.44287	0.973209	0.837894	0.037177
chromosome	cysK	3,687,960..3,688,958	999	<=	cysK, cysteine synthase A	cysK	ACX60_RS17185	ABUW_3709	A1S_0177	KZA74_17520	1206.74	-0.454135	-0.449877	-0.674563	0.973209	0.837894	0.187874
chromosome	KZA74_17720	3,726,669..3,727,295	627	=>	ftsN, SPOR domain-containing protein	ftsN	ACX60_RS17385	ABUW_3748	A1S_0137	KZA74_17720	625.398	0.262701	-0.256792	1.53289	0.973209	0.837894	5.36023e-09
chromosome	KZA74_17775	3,736,106..3,736,696	591	<=	LysE family transporter	lysE	ACX60_RS17440	ABUW_3759	A1S_0126	KZA74_17775	335.137	0.328486	0.410266	1.13213	0.973209	0.837894	0.0080173
chromosome	KZA74_18060	3,801,772..3,802,986	1215	=>	aspartate/tyrosine/aromatic aminotransferase	tyrB	ACX60_RS17710	ABUW_3810	A1S_0071	KZA74_18060	4255.62	0.451378	-0.796042	0.85611	0.973209	0.837894	0.340975
chromosome	KZA74_18150	3,823,464..3,824,543	1080	<=	DegT/DnrJ/EryC1/StrS family aminotransferase	dcaC	ACX60_RS17800	NA	A1S_0055	KZA74_18150	2706.84	-0.447315	-0.750113	1.35295	0.973209	0.837894	0.090648
chromosome	KZA74_18190	3,832,462..3,833,157	696	=>	FKBP-type peptidyl-prolyl cis-trans isomerase	fklB	ACX60_RS17840	ABUW_3835	A1S_0047	KZA74_18190	610.656	-0.3528	-0.370148	0.847406	0.973209	0.837894	0.0351223
chromosome	ampD	3,834,826..3,835,395	570	<=	ampD, 1,6-anhydro-N-acetylmuramyl-L-alanine amidaseAmpD	ampD	ACX60_RS17850	ABUW_3837	A1S_0045	KZA74_18200	322.787	0.242893	0.225512	0.0620078	0.973209	0.837894	0.810605
chromosome	KZA74_18400	3,872,858..3,873,724	867	<=	MBL fold metallo-hydrolase	MBL	ACX60_RS18045	ABUW_3876	A1S_2957	KZA74_18400	505.352	0.502318	-0.370024	-0.0205993	0.973209	0.837894	0.963936
chromosome	grpE	3,874,889..3,875,443	555	=>	grpE, nucleotide exchange factor GrpE	GRPE	ACX60_RS18055	ABUW_3878	A1S_2959	KZA74_18410	1937.13	-0.488967	-0.71064	1.09587	0.973209	0.837894	0.157074
chromosome	KZA74_18460	3,886,271..3,887,521	1251	<=	ltrA, low temperature requirement protein A	ltrA	ACX60_RS18105	ABUW_3889	A1S_3870	KZA74_18460	773.443	-0.153099	-0.208212	-0.474223	0.973209	0.837894	0.0370371
pAB3	KZA74_18785	41,450..41,776	327	=>	KZA74_18785	NA	NA	NA	NA	KZA74_18785	181.474	0.50529	0.306779	1.01395	0.973209	0.837894	0.00196095
pAB3	KZA74_18835	48,946..49,878	933	=>	KZA74_18835	NA	NA	NA	A1S_3513	KZA74_18835	44.3127	0.257044	-0.468573	-1.32361	0.973209	0.837894	0.00653142
pAB3	KZA74_19230	131,774..132,877	1104	<=	type I DNA topoisomerase	NA	NA	NA	A1S_0651	KZA74_19230	911.662	0.243083	-0.297229	0.35829	0.973209	0.837894	0.26626
chromosome	KZA74_17975	3,782,599..3,783,021	423	<=	KZA74_17975	NA	ACX60_RS17640	NA	NA	KZA74_17975	84.1764	0.253939	0.470117	-1.10691	0.973927	0.837894	0.0294482
chromosome	yccS	367,773..369,923	2151	<=	yccS, TIGR01666 family membrane protein	yccS	ACX60_RS01765	ABUW_0338	A1S_3144	KZA74_01760	490.535	0.186488	0.387904	-0.20922	0.97575	0.837894	0.654107
chromosome	KZA74_02740	554,017..554,898	882	<=	copD	copD, pcoD	ACX60_RS02740	ABUW_3327	A1S_2941	KZA74_02740	295.992	0.350816	0.692815	1.00667	0.97575	0.837894	0.203193
chromosome	KZA74_02990	610,950..611,876	927	=>	branched-chain amino acid transaminase	ilvE, E2.6.1.42	ACX60_RS02985	ABUW_0587	A1S_2904	KZA74_02990	4721.92	-0.37251	-0.744228	1.0781	0.97575	0.837894	0.190781
chromosome	KZA74_03110	637,494..638,666	1173	<=	acyl-CoA desaturase	SCD, desC	ACX60_RS03105	ABUW_0611	A1S_2881	KZA74_03110	8014.59	-0.272043	-0.705245	1.76987	0.97575	0.837894	0.0198892
chromosome	thrH	752,487..753,104	618	=>	thrH, bifunctional phosphoserinephosphatase/homoserine phosphotransferase ThrH	thrH	ACX60_RS03645	ABUW_0723	A1S_2774	KZA74_03655	755.771	-0.186902	-0.404541	1.08328	0.97575	0.837894	0.0127056
chromosome	basI	1,220,027..1,220,782	756	=>	basI, acinetobactin biosynthesis phosphopantetheinyl transferase BasI	basI	ACX60_RS05675	ABUW_1187	A1S_2373	KZA74_05705	123.87	0.26872	0.57543	-2.18317	0.97575	0.837894	0.000522047
chromosome	KZA74_06140	1,319,266..1,319,436	171	<=	hemP, hemin uptake protein HemP	hemP	ACX60_RS06110	ABUW_1355	NA	KZA74_06140	516.124	-0.221756	0.565314	4.74841	0.97575	0.837894	7.98302e-17
chromosome	KZA74_09810	2,061,205..2,061,618	414	=>	HIT family protein	HINT1, hinT, hit	ACX60_RS09545	ABUW_2159	A1S_1678	KZA74_09810	1196.03	-0.317184	-0.661711	1.72504	0.97575	0.837894	0.0131162
chromosome	KZA74_09945	2,089,558..2,089,851	294	<=	KZA74_09945	bfnK	ACX60_RS09680	ABUW_2181	NA	KZA74_09945	36.7268	0.297551	0.580298	0.655474	0.97575	0.837894	0.309649
chromosome	KZA74_15025	3,152,349..3,153,221	873	<=	LysR family transcriptional regulator	NA	ACX60_RS14710	ABUW_3199	A1S_0735	KZA74_15025	207.996	0.241547	0.566403	-3.14998	0.97575	0.837894	4.75898e-08
chromosome	KZA74_15420	3,236,095..3,236,346	252	=>	KZA74_15420	NA	ACX60_RS15100	ABUW_3278	A1S_3506	KZA74_15420	2259.95	0.28843	-0.706706	2.82075	0.97575	0.837894	0.000134109
chromosome	metW	3,380,067..3,380,660	594	=>	metW, methionine biosynthesis protein MetW	metW	ACX60_RS15745	ABUW_3407	A1S_0470	KZA74_16070	1784.63	-0.212208	-0.514362	0.810529	0.97575	0.837894	0.165353
chromosome	fadB	3,553,591..3,555,744	2154	=>	fadB, fatty acid oxidation complex subunit alpha FadB	fadB	ACX60_RS16555	ABUW_3572	A1S_0306	KZA74_16885	12080.1	0.414502	-0.833745	1.80553	0.97575	0.837894	0.0475465
chromosome	fadA	3,555,757..3,556,929	1173	=>	fadA, acetyl-CoA C-acyltransferase FadA	fadA, fadI	ACX60_RS16560	ABUW_3573	A1S_0305	KZA74_16890	5980.89	0.419913	-0.838079	1.45086	0.97575	0.837894	0.118411
chromosome	KZA74_17060	3,591,079..3,591,708	630	<=	FHA domain-containing protein	NA	ACX60_RS16730	ABUW_3605	A1S_0272	KZA74_17060	795.962	0.155312	-0.409525	0.634874	0.977542	0.837894	0.171269
chromosome	pyrE	155,754..156,404	651	=>	pyrE, orotate phosphoribosyltransferase	pyrE	ACX60_RS00740	ABUW_0142	A1S_3340	KZA74_00720	493.702	0.0816599	-0.215877	-0.321993	0.977836	0.837894	0.186117
chromosome	KZA74_04335	905,247..905,852	606	<=	VCBS repeat-containing protein	NA	ACX60_RS04315	NA	A1S_3823	KZA74_04335	108.264	0.163814	0.491135	0.529682	0.978617	0.837894	0.318868
chromosome	tal	1,561,655..1,562,644	990	<=	tal, transaldolase	E2.2.1.2, talA, talB	ACX60_RS07265	ABUW_1671	A1S_2065	KZA74_07300	1555.35	-0.18477	-0.567481	0.769475	0.978617	0.837894	0.217762
chromosome	KZA74_12205	2,554,757..2,555,080	324	=>	ferredoxin family protein	fdxA	ACX60_RS11915	ABUW_2636	A1S_1249	KZA74_12205	576.249	0.200132	-0.565304	2.27214	0.978617	0.837894	0.000131325
chromosome	KZA74_18185	3,831,689..3,832,411	723	=>	FKBP-type peptidyl-prolyl cis-trans isomerase	fkpA	ACX60_RS17835	ABUW_3834	A1S_0048	KZA74_18185	828.1	-0.105176	-0.331837	1.61639	0.978617	0.837894	1.07735e-06
pAB3	tadA	98,182..98,436	255	<=	tadA	NA	NA	NA	A1S_0643	KZA74_19040	473.392	0.126971	-0.386636	1.37876	0.978617	0.837894	0.000608396
chromosome	wbpD	3,824,545..3,825,123	579	<=	wbpD, UDP-2-acetamido-3-amino-2,3-dideoxy-D-glucuronate N-acetyltransferase	dcaB	ACX60_RS17805	NA	A1S_0054	KZA74_18155	1082.87	0.131789	-0.422868	0.466857	0.97967	0.837894	0.332864
chromosome	acpP	3,049,834..3,050,070	237	<=	acpP, acyl carrier protein	acpP	ACX60_RS14270	ABUW_3107	A1S_0819	KZA74_14585	2440.75	-0.242802	-0.830594	1.34218	0.980598	0.837894	0.13611
chromosome	KZA74_15740	3,307,581..3,308,090	510	=>	KZA74_15740	lptE, rlpB	ACX60_RS15415	ABUW_3360	A1S_0540	KZA74_15740	685.949	0.124023	-0.397963	2.08709	0.980598	0.837894	6.26041e-07
pAB3	KZA74_19205	128,743..129,570	828	=>	DUF1456 family protein	NA	NA	NA	A1S_3553	KZA74_19205	36.3748	0.147635	-0.47953	-0.109129	0.980598	0.837894	0.846072
chromosome	KZA74_15975	3,352,772..3,354,085	1314	<=	alpha/beta hydrolase	NA	ACX60_RS15650	ABUW_3388	A1S_0490	KZA74_15975	1420.93	-0.101561	-0.344214	0.453739	0.981995	0.837894	0.250229
chromosome	KZA74_09760	2,054,181..2,054,510	330	<=	YbaB/EbfC family nucleoid-associated protein	K09747	ACX60_RS09495	ABUW_2148	A1S_1684	KZA74_09760	513.709	-0.147373	-0.536304	0.741201	0.983037	0.837894	0.210457
chromosome	KZA74_17770	3,735,457..3,736,098	642	=>	DedA family protein	dedA	ACX60_RS17435	ABUW_3758	A1S_0127	KZA74_17770	315.705	-0.0790015	0.329728	0.809198	0.987173	0.837894	0.0208465
chromosome	lipA	1,271,459..1,272,472	1014	<=	lipA, lipoyl synthase	lipA	ACX60_RS05880	ABUW_1228	A1S_2329	KZA74_05910	3638.45	-0.12321	-0.634364	1.37469	0.988413	0.837894	0.0387494
chromosome	KZA74_15240	3,196,341..3,197,533	1193	<=	transporter	filC	ACX60_RS14925	ABUW_3243	A1S_0692	KZA74_15240	476.921	-0.066901	0.317338	-0.182861	0.988413	0.837894	0.621518
chromosome	ilvC	3,300,638..3,301,654	1017	<=	ilvC, ketol-acid reductoisomerase	ilvC	ACX60_RS15390	ABUW_3355	A1S_0545	KZA74_15715	5890.69	-0.169826	-0.815675	1.90658	0.988413	0.837894	0.0312793
chromosome	KZA74_05110	1,075,668..1,076,324	657	<=	HAD-IB family hydrolase	NA	ACX60_RS05090	ABUW_1055	A1S_2496	KZA74_05110	325.6	0.0531894	0.308331	0.897639	0.9888	0.837894	0.00696889
chromosome	KZA74_18125	3,817,868..3,818,908	1041	<=	EpsG family protein	wzy	ACX60_RS17775	NA	A1S_3483	KZA74_18125	232.035	0.123685	0.817281	1.1517	0.9888	0.837894	0.217347
chromosome	KZA74_02300	469,120..469,713	594	=>	HAD-IB family hydrolase	HAD-IB	ACX60_RS02300	ABUW_0448	A1S_3044	KZA74_02300	238.54	0.0310694	0.419161	-0.00343412	0.991879	0.837894	0.995144
chromosome	KZA74_03735	769,006..769,467	462	<=	NfeD family protein	ybbJ, nfeD	ACX60_RS03725	ABUW_0822	A1S_2757	KZA74_03735	602.918	0.0333682	-0.322263	1.07864	0.991879	0.837894	0.00189316
chromosome	KZA74_06555	1,397,840..1,398,598	759	<=	HD domain-containing protein	NA	ACX60_RS06525	NA	A1S_2210	KZA74_06555	109.895	0.0393472	0.495123	-0.11333	0.991879	0.837894	0.846336
chromosome	tviB	3,826,101..3,827,396	1296	<=	tviB, Vi polysaccharide biosynthesisUDP-N-acetylglucosamine C-6 dehydrogenase TviB	gna	ACX60_RS17815	ABUW_3830	A1S_0052	KZA74_18165	2548.64	-0.0667842	-0.559502	1.37216	0.991879	0.837894	0.0228956
chromosome	KZA74_09620	2,024,997..2,026,001	1005	<=	homoserine dehydrogenase	E1.1.1.3	ACX60_RS09355	ABUW_2120	A1S_1711	KZA74_09620	226.62	-0.0177731	0.441371	-1.89213	0.995437	0.837894	4.15455e-05
chromosome	nagZ	3,350,531..3,351,550	1020	=>	nagZ, beta-N-acetylhexosaminidase	nagZ	ACX60_RS15640	ABUW_3386	A1S_0492	KZA74_15965	749.734	-0.395606	-0.245018	-0.152213	0.973209	0.83826	0.603829
pAB3	KZA74_18950	81,019..82,851	1833	=>	KZA74_18950	NA	NA	NA	NA	KZA74_18950	285.921	0.055676	-0.712421	1.24338	0.991879	0.83826	0.121825
chromosome	KZA74_12155	2,542,228..2,543,532	1305	<=	MFS transporter	pcaK	ACX60_RS11865	ABUW_2628	A1S_1257	KZA74_12155	383.967	0.0180898	0.370898	-3.7798	0.993571	0.83826	5.08614e-21
chromosome	prpF	765,368..766,555	1188	=>	prpF, 2-methylaconitate cis-trans isomerase PrpF	prpF	ACX60_RS03705	ABUW_0818	A1S_2761	KZA74_03715	1345.74	0.272632	-0.415724	-0.284361	0.973209	0.838573	0.568343
chromosome	accC	1,642,537..1,643,907	1371	<=	accC, acetyl-CoA carboxylase biotin carboxylasesubunit	accC	ACX60_RS07730	ABUW_1696	A1S_2011	KZA74_07775	2328.65	-0.403098	-0.555439	1.34639	0.973209	0.838573	0.0294611
chromosome	KZA74_11400	2,371,138..2,372,004	867	<=	cysteine ABC transporter substrate-bindingprotein	ABC.PA.S	ACX60_RS11120	ABUW_2420	A1S_1400	KZA74_11400	383.834	-0.386627	-0.298034	0.112364	0.973209	0.838573	0.756591
chromosome	KZA74_15395	3,231,124..3,231,945	822	<=	acetyl-CoA carboxylase carboxyltransferasesubunit alpha	accA	ACX60_RS15080	ABUW_3274	A1S_0608	KZA74_15395	1906.51	-0.514308	-0.586064	-0.266465	0.973209	0.838573	0.707683
chromosome	KZA74_15805	3,319,625..3,320,059	435	<=	excinuclease	NA	ACX60_RS15480	NA	A1S_0526	KZA74_15805	350.236	-0.46233	-0.485566	0.0465804	0.973209	0.838573	0.938141
chromosome	KZA74_09730	2,049,921..2,050,226	306	<=	KZA74_09730	K09902	ACX60_RS09465	ABUW_2142	A1S_1688	KZA74_09730	1018.16	-0.225232	-0.596877	1.84928	0.977802	0.838573	0.00469772
chromosome	KZA74_03745	770,558..771,184	627	<=	lysophospholipid acyltransferase family protein	NA	ACX60_RS03735	ABUW_0824	A1S_2755	KZA74_03745	227.999	-0.0113753	0.296514	-0.552697	0.995974	0.839184	0.0998005
chromosome	benB	2,594,531..2,595,031	501	=>	benB	benB-xylY	ACX60_RS12155	ABUW_2711	A1S_1214	KZA74_12435	329.069	-3.00013	-1.00176	-5.00913	0.198605	0.839664	6.77393e-06
chromosome	KZA74_15305	3,211,871..3,211,946	76	<=	tRNA-Ala	trnA	NA	NA	A1S_0678	KZA74_15305	1.84396	4.88713	2.02622	-0.0522577	0.363035	0.839664	0.984136
chromosome	KZA74_00545	118,065..118,898	834	=>	sadH, SDR family NAD(P)-dependent oxidoreductase	sadH	ACX60_RS00545	ABUW_0108	A1S_3372	KZA74_00545	547.756	0.476997	0.188924	-0.665939	0.43844	0.839664	0.00155423
chromosome	KZA74_08590	1,806,422..1,806,907	486	=>	KZA74_08590	NA	ACX60_RS08530	ABUW_1862	A1S_3741	KZA74_08590	532.413	-1.70859	-0.677735	-4.68232	0.448702	0.839664	3.45308e-10
chromosome	KZA74_15815	3,321,297..3,322,022	726	<=	3-ketoacyl-ACP reductase FabG2	fabG	ACX60_RS15490	NA	A1S_0524	KZA74_15815	398.182	-0.568953	-0.242336	-0.751061	0.5968	0.839664	0.00578598
pAB3	KZA74_19140	119,201..120,373	1173	=>	KZA74_19140	NA	NA	NA	NA	KZA74_19140	17.7382	1.36432	0.667188	-0.48402	0.860509	0.839664	0.55945
chromosome	KZA74_00160	39,626..40,249	624	<=	TetR/AcrR family transcriptional regulator	mexL	ACX60_RS00160	ABUW_0033	A1S_3448	KZA74_00160	216.641	0.282355	0.465353	0.28295	0.973209	0.839664	0.623359
chromosome	hutH	83,904..85,442	1539	=>	hutH, histidine ammonia-lyase	hutH, HAL	ACX60_RS00385	ABUW_0078	A1S_3405	KZA74_00390	9915.04	-1.15295	-0.756007	1.06785	0.973209	0.839664	0.226405
chromosome	KZA74_00555	120,429..121,583	1155	<=	ybdL, pyridoxal phosphate-dependent aminotransferase	ybdL	ACX60_RS00555	ABUW_0110	A1S_3370	KZA74_00555	842.179	-0.296512	-0.269318	0.704775	0.973209	0.839664	0.0183615
chromosome	KZA74_00560	121,611..122,921	1311	<=	membrane prot, DUF445 domain-containing protein	mp	ACX60_RS00560	ABUW_0111	A1S_3369	KZA74_00560	1066.06	-0.256719	-0.271997	0.382641	0.973209	0.839664	0.23447
chromosome	KZA74_01120	246,374..246,925	552	=>	tetR family	tetR	ACX60_RS01135	NA	A1S_3264	KZA74_01120	107.847	0.522191	0.621608	-4.55694	0.973209	0.839664	7.33042e-10
chromosome	elbB	254,421..255,083	663	<=	elbB, isoprenoid biosynthesis glyoxalase ElbB	elbB	ACX60_RS01200	NA	A1S_3256	KZA74_01185	159.479	0.253484	0.428884	-1.89658	0.973209	0.839664	7.92636e-05
chromosome	KZA74_01770	370,807..371,925	1119	<=	ydiK, AI-2E family transporter	ydiK	ACX60_RS01775	ABUW_0340	A1S_3142	KZA74_01770	1002.52	0.127281	0.193224	1.474	0.973209	0.839664	3.84405e-13
chromosome	KZA74_03080	628,957..630,738	1782	<=	acyl-CoA dehydrogenase C-terminaldomain-containing protein	NA	ACX60_RS03075	ABUW_0605	A1S_2887	KZA74_03080	3261.05	0.567074	-0.6058	1.08041	0.973209	0.839664	0.128614
chromosome	KZA74_03085	630,906..632,708	1803	<=	acyl-CoA dehydrogenase C-terminaldomain-containing protein	NA	ACX60_RS03080	ABUW_0606	A1S_2886	KZA74_03085	6360.33	0.573652	-0.693745	1.7398	0.973209	0.839664	0.0279575
chromosome	glpD	874,150..875,667	1518	=>	glpD, glycerol-3-phosphate dehydrogenase	glpA, glpD	ACX60_RS04175	ABUW_0912	A1S_2669	KZA74_04195	1072.44	-0.470478	-0.281119	-0.914623	0.973209	0.839664	0.00379262
chromosome	KZA74_04795	1,015,929..1,016,535	607	=>	transposase		ACX60_RS04780	NA	A1S_2557	KZA74_04795	125.745	-1.0884	-0.655212	-3.02808	0.973209	0.839664	2.12938e-05
chromosome	KZA74_04950	1,044,662..1,046,038	1377	=>	Do family serine endopeptidase	degP, htrA	ACX60_RS04935	ABUW_1027	A1S_2525	KZA74_04950	1016.47	-0.398502	-0.312313	0.622739	0.973209	0.839664	0.0777948
chromosome	KZA74_05355	1,133,802..1,135,181	1380	=>	amino acid permease	aroP	ACX60_RS05330	ABUW_1114	A1S_2449	KZA74_05355	1901.52	-0.718696	-0.997289	-3.19169	0.973209	0.839664	0.00458648
chromosome	KZA74_06150	1,320,494..1,321,045	552	<=	tetratricopeptide repeat protein	NA	ACX60_RS06120	ABUW_1357	A1S_2285	KZA74_06150	387.981	-0.27446	-0.220361	1.00051	0.973209	0.839664	2.27408e-05
chromosome	KZA74_08785	1,849,228..1,849,689	462	=>	MaoC family dehydratase	NA	ACX60_RS08725	NA	A1S_1818	KZA74_08785	121.36	-0.494094	-0.401941	-2.13466	0.973209	0.839664	1.79359e-06
chromosome	KZA74_08790	1,849,699..1,851,522	1824	=>	acyl-CoA dehydrogenase	dmdC_4	ACX60_RS08730	NA	A1S_1817	KZA74_08790	732.606	-0.489374	-0.334438	-1.82037	0.973209	0.839664	4.12931e-07
chromosome	KZA74_08915	1,875,417..1,876,037	621	=>	TetR/AcrR family transcriptional regulator	slmA	ACX60_RS08860	ABUW_1932	A1S_1798	KZA74_08915	262.931	-0.318567	-0.228242	0.818089	0.973209	0.839664	0.00105265
chromosome	KZA74_09100	1,916,536..1,917,156	621	=>	KZA74_09100	NA	ACX60_RS09045	NA	A1S_3727	KZA74_09100	738.739	0.810437	-0.660856	1.31577	0.973209	0.839664	0.0856086
chromosome	KZA74_09420	1,983,318..1,984,376	1059	=>	AraC family transcriptional regulator	NA	ACX60_RS09155	ABUW_2084	A1S_1746	KZA74_09420	279.949	0.345485	0.437699	-1.31386	0.973209	0.839664	0.00804508
chromosome	KZA74_09605	2,022,634..2,023,029	396	=>	helix-turn-helix transcriptional regulator		ACX60_RS09340	NA	A1S_1714	KZA74_09605	182.028	-0.516262	-0.272303	0.0965454	0.973209	0.839664	0.769518
chromosome	KZA74_09785	2,058,619..2,058,993	375	<=	TonB C-terminal domain-containing protein	NA	ACX60_RS09520	ABUW_2154	NA	KZA74_09785	106.323	0.514916	0.308347	0.49729	0.973209	0.839664	0.161589
chromosome	KZA74_09890	2,077,871..2,078,959	1089	=>	3-deoxy-7-phosphoheptulonate synthase	E2.5.1.54, aroF, aroG, aroH	ACX60_RS09625	ABUW_2170	A1S_1664	KZA74_09890	1817.89	-0.37882	-0.4723	1.71897	0.973209	0.839664	0.00116739
chromosome	KZA74_09930	2,086,943..2,087,563	621	<=	acetyltransferase	NA	ACX60_RS09665	ABUW_2178	A1S_1657	KZA74_09930	264.685	0.450066	0.57994	2.10666	0.973209	0.839664	0.00113494
chromosome	KZA74_09950	2,089,936..2,092,254	2319	<=	TonB-dependent receptor	bfnJ	ACX60_RS09685	ABUW_2182	A1S_1655	KZA74_09950	2091.69	-0.414894	-0.536934	1.94843	0.973209	0.839664	0.00109865
chromosome	rraA	2,127,705..2,128,211	507	<=	rraA, ribonuclease E activity regulator RraA	rraA, menG	ACX60_RS09845	ABUW_2214	A1S_1619	KZA74_10110	575.685	-0.390533	-0.390058	-0.127711	0.973209	0.839664	0.789018
chromosome	KZA74_10430	2,182,444..2,182,716	273	=>	KZA74_10430	NA	NA	NA	NA	KZA74_10430	58.7238	-0.76807	-0.483229	-4.30552	0.973209	0.839664	2.40727e-13
chromosome	KZA74_10760	2,242,097..2,242,687	591	<=	YceI family protein	NA	ACX60_RS10490	ABUW_2293	A1S_1523	KZA74_10760	2319.42	-0.422966	-0.725177	0.627252	0.973209	0.839664	0.466176
chromosome	KZA74_11405	2,372,087..2,372,947	861	<=	transporter substrate-binding domain-containingprotein	glnQ1, ABC.PA.S	ACX60_RS11125	ABUW_2421	A1S_1399	KZA74_11405	383.056	-0.480297	-0.267756	0.444617	0.973209	0.839664	0.150285
chromosome	KZA74_12960	2,689,454..2,689,681	228	<=	KZA74_12960	NA	ACX60_RS12680	ABUW_2756	NA	KZA74_12960	136.791	-0.701323	0.508153	0.715769	0.973209	0.839664	0.228296
chromosome	KZA74_13215	2,748,541..2,749,986	1446	=>	FAD-binding oxidoreductase	NA	ACX60_RS12935	ABUW_2807	A1S_1084	KZA74_13215	905.671	-0.266868	-0.326514	-0.377954	0.973209	0.839664	0.329612
chromosome	KZA74_13645	2,851,838..2,853,175	1338	=>	citN, CitMHS family transporter	TC.CITMHS	ACX60_RS13355	ABUW_2892	A1S_1004	KZA74_13645	1432.13	-0.235718	-0.408152	1.01433	0.973209	0.839664	0.0295969
chromosome	minC	2,993,998..2,994,720	723	=>	minC, septum site-determining protein MinC	minC	ACX60_RS13975	ABUW_3048	A1S_0881	KZA74_14285	829.791	-0.29192	-0.395128	1.15154	0.973209	0.839664	0.00845567
chromosome	KZA74_14400	3,018,689..3,018,765	77	<=	tRNA-Met	trnM	NA	NA	A1S_0846	KZA74_14400	42.6	0.479335	0.349164	-2.61138	0.973209	0.839664	1.46357e-09
chromosome	gspE	3,219,267..3,220,757	1491	<=	gspE, type II secretion system ATPase GspE	gspE	ACX60_RS15040	ABUW_3266	A1S_0616	KZA74_15355	895.82	-0.300001	-0.184199	-0.249365	0.973209	0.839664	0.247766
chromosome	KZA74_15785	3,317,706..3,318,122	417	=>	rhodanese-like domain-containing protein	rhod	ACX60_RS15460	ABUW_3369	A1S_0530	KZA74_15785	2523.76	-0.573426	-0.6473	1.79646	0.973209	0.839664	0.0139126
chromosome	gspG	3,480,067..3,480,648	582	<=	gspG, type II secretion system major pseudopilin GspG	gspG	ACX60_RS16250	ABUW_3509	A1S_0370	KZA74_16575	500.604	-0.251903	-0.280839	-0.0301663	0.973209	0.839664	0.931002
chromosome	KZA74_16810	3,537,189..3,538,499	1311	<=	tetratricopeptide repeat protein	NA	ACX60_RS16480	ABUW_3556	A1S_0322	KZA74_16810	462.424	0.217274	0.3805	-0.694664	0.973209	0.839664	0.116993
chromosome	lptG	3,632,896..3,633,966	1071	<=	lptG, LPS export ABC transporter permease LptG	lptG	ACX60_RS16925	ABUW_3644	A1S_0229	KZA74_17255	960.652	-0.201675	-0.250862	0.784562	0.973209	0.839664	0.00487548
chromosome	ppa	3,665,215..3,665,742	528	<=	ppa, inorganic diphosphatase	ppa	ACX60_RS17080	ABUW_3686	A1S_0200	KZA74_17415	1471.63	-0.361654	-0.582603	1.5949	0.973209	0.839664	0.014738
chromosome	KZA74_17700	3,720,781..3,721,407	627	<=	LysE family transporter	rhtB	ACX60_RS17365	ABUW_3744	A1S_0142	KZA74_17700	351.467	0.318258	0.191541	-0.323716	0.973209	0.839664	0.140777
chromosome	KZA74_17965	3,781,287..3,781,988	702	=>	SDR family oxidoreductase	SDR	ACX60_RS17630	ABUW_3798	A1S_0087	KZA74_17965	518.269	-0.359886	-0.449023	-0.528614	0.973209	0.839664	0.31932
chromosome	KZA74_18095	ND	ND	ND	pgi, glucose-6-phosphate isomerase	gpi, pgi	ACX60_RS17745	ABUW_3817	A1S_0064	KZA74_18095	2001.73	-0.650561	-0.482941	0.566947	0.973209	0.839664	0.320532
chromosome	KZA74_18180	3,829,310..3,831,496	2187	=>	polysaccharide biosynthesis tyrosine autokinase	wzc	ACX60_RS17830	ABUW_3833	A1S_0049	KZA74_18180	2886.68	-0.480193	-0.546784	1.72118	0.973209	0.839664	0.00472723
chromosome	purE	3,883,527..3,884,039	513	<=	purE, 5-(carboxyamino)imidazole ribonucleotide mutase	purE	ACX60_RS18090	ABUW_3886	A1S_2964	KZA74_18445	888.161	0.581799	-0.387269	1.45972	0.973209	0.839664	0.000549062
chromosome	KZA74_07045	1,506,204..1,506,422	219	=>	KZA74_07045	NA	ACX60_RS07015	ABUW_1612	NA	KZA74_07045	6.3327	-0.467649	1.04038	0.00422031	0.97575	0.839664	0.997497
chromosome	KZA74_12905	2,681,613..2,682,020	408	=>	KZA74_12905	NA	ACX60_RS12625	NA	NA	KZA74_12905	21.6904	-0.255247	0.612176	-2.995	0.97575	0.839664	4.90895e-05
chromosome	KZA74_13675	2,857,493..2,858,935	1443	<=	capsule assembly Wzi family protein	wzi	ACX60_RS13380	ABUW_2898	A1S_0999	KZA74_13675	1473.98	-0.244253	-0.489391	-0.283096	0.97575	0.839664	0.633289
chromosome	leuA	3,377,127..3,378,824	1698	=>	leuA, 2-isopropylmalate synthase	leuA, IMS	ACX60_RS15735	ABUW_3405	A1S_0472	KZA74_16060	4956.59	-0.275852	-0.589572	0.879001	0.97575	0.839664	0.209415
chromosome	rpmB	3,401,074..3,401,310	237	=>	rpmB, 50S ribosomal protein L28	RP-L28, MRPL28, rpmB	ACX60_RS15860	ABUW_3430	A1S_0448	KZA74_16185	3736.22	0.35366	-0.739145	3.68628	0.97575	0.839664	4.19809e-06
chromosome	KZA74_16300	3,424,755..3,426,014	1260	=>	KZA74_16300	NA	ACX60_RS15975	ABUW_3453	A1S_0425	KZA74_16300	328.617	0.217523	0.495499	-1.31763	0.97575	0.839664	0.0171406
pAB3	KZA74_18805	43,820..44,389	570	=>	KZA74_18805	NA	NA	NA	NA	KZA74_18805	77.4482	0.215902	0.494617	1.68321	0.97575	0.839664	0.00221646
chromosome	KZA74_02685	545,950..546,282	333	=>	KZA74_02685	NA	ACX60_RS02690	NA	NA	KZA74_02685	97.1385	-0.12537	0.382065	0.469988	0.980598	0.839664	0.298784
chromosome	dctA	2,930,667..2,931,929	1263	=>	dctA, C4-dicarboxylate transporter DctA	dctA	ACX60_RS13700	ABUW_2963	A1S_0935	KZA74_14005	271.22	0.159833	0.489457	-3.51463	0.980598	0.839664	1.4751e-10
chromosome	KZA74_05500	1,169,261..1,169,563	303	=>	YbdD/YjiX family protein	ybd, yjiX	ACX60_RS05475	ABUW_1143	A1S_2416	KZA74_05500	713.577	0.187096	-0.626199	-0.517189	0.981995	0.839664	0.491505
chromosome	KZA74_01660	351,278..351,760	483	=>	prepilin-type N-terminal cleavage/methylation domain-containing protein	pilY2	ACX60_RS01665	ABUW_0318	A1S_3166	KZA74_01660	115.364	0.165165	0.559195	-1.9669	0.982624	0.839664	0.00183176
chromosome	KZA74_06350	1,360,853..1,362,280	1428	=>	M48 family metalloprotease	NA	ACX60_RS06320	ABUW_1450	A1S_2247	KZA74_06350	781.965	-0.045201	-0.193159	0.0292977	0.988413	0.839664	0.90505
chromosome	KZA74_08075	1,698,632..1,699,168	537	<=	GNAT family N-acetyltransferase	NA	ACX60_RS08015	ABUW_1754	A1S_1959	KZA74_08075	103.329	0.0838683	0.408452	-1.19151	0.988413	0.839664	0.00935206
chromosome	KZA74_16330	3,429,960..3,430,367	408	=>	KZA74_16330	NA	ACX60_RS16005	ABUW_3459	NA	KZA74_16330	95.0274	0.0814067	0.376743	-0.432049	0.988413	0.839664	0.337052
chromosome	KZA74_00300	64,358..64,960	603	<=	nlpB, lipoprotein-34 precursor (NlpB)	nlpB	ACX60_RS00295	ABUW_0060	A1S_3424	KZA74_00300	1757.35	-0.0840515	-0.482956	2.186	0.9888	0.839664	4.12892e-05
chromosome	KZA74_10920	2,272,666..2,273,415	750	=>	YebC/PmpR family DNA-binding transcriptionalregulator	NA	ACX60_RS10650	ABUW_2327	A1S_1496	KZA74_10920	1072.1	0.0665408	-0.385585	2.24092	0.9888	0.839664	4.77075e-08
chromosome	KZA74_08850	1,862,161..1,862,472	312	=>	KZA74_08850	NA	ACX60_RS08795	ABUW_1919	A1S_3732	KZA74_08850	79.7769	0.0627467	0.407108	1.57857	0.989848	0.839664	0.00040127
chromosome	leuC	3,432,901..3,434,319	1419	<=	leuC, 3-isopropylmalate dehydratase large subunit	leuC, IPMI-L	ACX60_RS16025	ABUW_3463	A1S_0417	KZA74_16350	973.748	-0.0295892	-0.356477	-0.267601	0.991879	0.839664	0.537624
chromosome	KZA74_17675	3,717,173..3,717,571	399	<=	ATP synthase subunit I	atpI	ACX60_RS17340	ABUW_3739	A1S_0147	KZA74_17675	838.311	0.0308331	-0.475488	0.631331	0.991879	0.839664	0.265554
chromosome	KZA74_17790	3,738,228..3,738,620	393	<=	SirB2 family protein	sirB2	ACX60_RS17455	ABUW_3762	A1S_0123	KZA74_17790	224.657	-0.0187313	-0.212907	0.265894	0.991879	0.839664	0.274152
chromosome	ppsA	1,441,895..1,444,282	2388	<=	ppsA, phosphoenolpyruvate synthase	pps, ppsA	ACX60_RS06745	ABUW_1555	A1S_2164	KZA74_06775	13307.3	0.0393368	-0.717563	0.903607	0.992114	0.839664	0.290105
chromosome	ibaG	3,205,753..3,206,004	252	<=	ibaG, BolA family iron metabolism protein IbaG	ibaG	ACX60_RS14965	ABUW_3251	A1S_0684	KZA74_15280	326.772	0.0268719	-0.431256	1.40797	0.992114	0.839664	0.00348089
chromosome	KZA74_12355	2,580,852..2,581,241	390	<=	KZA74_12355	NA	ACX60_RS12070	ABUW_2694	A1S_3630	KZA74_12355	124.727	0.357794	0.426953	-2.47922	0.973209	0.839835	2.9645e-07
chromosome	pcaF	1,776,566..1,777,777	1212	=>	pcaF, 3-oxoadipyl-CoA thiolase	pcaF	ACX60_RS08385	ABUW_1833	A1S_1891	KZA74_08445	648.351	-1.44453	-0.431255	-3.25148	0.0982241	0.839922	7.88526e-12
chromosome	KZA74_06180	1,328,061..1,329,206	1146	=>	acyl-CoA dehydrogenase family protein	ACADL	ACX60_RS06150	ABUW_1363	A1S_2279	KZA74_06180	523.567	-0.214531	-0.236767	0.144367	0.973209	0.839922	0.622873
chromosome	KZA74_11385	2,369,226..2,369,864	639	<=	LysE family translocator	NA	ACX60_RS11110	ABUW_2418	A1S_1402	KZA74_11385	284.697	0.427071	0.547473	-4.03126	0.973209	0.841627	7.34897e-11
chromosome	KZA74_14560	3,044,661..3,046,442	1782	<=	DUF2157 domain-containing protein	NA	ACX60_RS14245	ABUW_3102	A1S_3571	KZA74_14560	621.692	0.129135	0.263796	-0.202456	0.97575	0.841627	0.533359
pAB3	KZA74_18915	73,568..74,110	543	=>	KZA74_18915	NA	NA	NA	NA	KZA74_18915	371.345	0.138656	-0.74898	0.911291	0.988793	0.841627	0.311569
chromosome	ttcA	891,171..892,076	906	=>	ttcA, tRNA 2-thiocytidine(32) synthetase TtcA	ttcA	ACX60_RS04240	ABUW_0926	A1S_2656	KZA74_04260	1290.76	0.346627	-0.419096	1.99194	0.973209	0.841845	1.98202e-05
chromosome	KZA74_05135	1,080,764..1,081,984	1221	=>	putative signal peptide	NA	ACX60_RS05115	ABUW_1060	A1S_2491	KZA74_05135	868.791	-0.514956	-0.38215	-2.16767	0.973209	0.841845	3.19906e-07
chromosome	KZA74_05255	1,110,168..1,110,800	633	=>	KZA74_05255	NA	ACX60_RS05230	ABUW_1084	A1S_2468	KZA74_05255	271.709	-0.375101	-0.250184	-0.10095	0.973209	0.841845	0.749044
chromosome	KZA74_10925	2,273,446..2,273,916	471	<=	Lrp/AsnC family transcriptional regulator	NA	ACX60_RS10655	ABUW_2328	A1S_1495	KZA74_10925	524.237	-0.602451	-0.401599	1.33305	0.973209	0.841845	0.00351457
chromosome	lon	2,824,883..2,827,312	2430	=>	lon, endopeptidase La	lon	ACX60_RS13225	ABUW_2865	A1S_1030	KZA74_13510	33863.1	-0.479227	-0.843174	0.927207	0.974056	0.841845	0.362178
chromosome	KZA74_13265	2,761,032..2,761,910	879	=>	LysR family transcriptional regulator	NA	ACX60_RS12985	NA	A1S_1076	KZA74_13265	169.569	0.136915	0.482284	-1.24248	0.986689	0.844146	0.0273741
pAB1	lysA	95..1345	1251	=>	lysA	NA	NA	NA	NA	KZA74_19300	3802.71	-0.193582	0.700653	-2.65718	0.986689	0.844243	0.000864656
chromosome	KZA74_03355	690,738..691,304	567	=>	DNA-3-methyladenine glycosylase	MPG	ACX60_RS03350	ABUW_0660	A1S_2830	KZA74_03355	303.878	-0.406283	-0.223756	-0.331247	0.973209	0.844285	0.213471
chromosome	KZA74_01320	273,742..275,256	1515	<=	cat1, Succinyl-CoA:coenzyme A transferase	aarC, cat1	ACX60_RS01335	ABUW_0255	A1S_3231	KZA74_01320	7623.48	-0.535182	-0.822379	-0.0375048	0.973209	0.844727	0.97298
chromosome	KZA74_11720	ND	ND	ND	pcaF, 3-oxoadipyl-CoA thiolase	paaJ	ACX60_RS11435	ABUW_2527	A1S_1344	KZA74_11720	2913.18	-0.71312	-1.0711	-2.33332	0.973209	0.844727	0.0634992
chromosome	rlmE	861,460..862,110	651	=>	rlmE, 23S rRNA (uridine(2552)-2'-O)-methyltransferaseRlmE	rlmE, rrmJ, ftsJ	ACX60_RS04105	ABUW_0898	A1S_2682	KZA74_04125	4673.44	-0.39185	-0.65906	0.874426	0.973209	0.845581	0.273089
chromosome	KZA74_12445	2,596,140..2,596,925	786	=>	benD, 1,6-dihydroxycyclohexa-2,4-diene-1-carboxylate dehydrogenase	benD-xylL	ACX60_RS12165	ABUW_2713	A1S_1212	KZA74_12445	525.335	-1.45273	-0.689274	-5.39557	0.82579	0.847991	3.58599e-12
chromosome	KZA74_11885	2,476,043..2,476,645	603	<=	KZA74_11885	NA	ACX60_RS11600	ABUW_2565	A1S_3648	KZA74_11885	150.821	-0.592922	-0.413306	-0.427984	0.973209	0.847991	0.392923
chromosome	ftsW	3,615,111..3,616,307	1197	<=	ftsW, putative lipid II flippase FtsW	ftsW, spoVE	ACX60_RS16850	ABUW_3629	A1S_0246	KZA74_17180	1283.06	0.194022	-0.28141	-0.376741	0.973209	0.847991	0.269848
chromosome	sppA	951,424..952,440	1017	=>	sppA, signal peptide peptidase SppA	sppA	ACX60_RS04515	ABUW_0978	A1S_2608	KZA74_04540	1236.94	-0.308416	-0.356833	0.921111	0.973209	0.848207	0.0278242
chromosome	KZA74_07690	1,624,997..1,625,320	324	=>	DUF4236 domain-containing protein	NA	NA	NA	NA	KZA74_07690	179.781	-0.593643	-0.497696	-2.49469	0.973209	0.848207	1.0962e-05
chromosome	KZA74_09540	2,007,514..2,008,932	1419	=>	aspartate ammonia-lyase	aspA	ACX60_RS09275	ABUW_2104	A1S_1726	KZA74_09540	1661.76	-0.427226	-0.698433	1.1996	0.973209	0.848207	0.153918
chromosome	KZA74_09720	2,048,661..2,049,512	852	<=	MoxR family ATPase	NA	ACX60_RS09455	ABUW_2140	A1S_1690	KZA74_09720	1347.65	-0.311653	-0.468102	1.79586	0.973209	0.848207	0.000833163
chromosome	KZA74_13705	2,863,844..2,864,788	945	=>	alpha/beta fold hydrolase	rdmC	ACX60_RS13410	ABUW_2904	A1S_0993	KZA74_13705	816.125	-0.49329	-0.29007	0.898831	0.973209	0.848207	0.00724625
chromosome	KZA74_14960	3,132,419..3,132,553	135	=>	yajC, preprotein translocase subunit YajC	yajC	ACX60_RS14645	ABUW_3184	NA	KZA74_14960	147.128	1.13441	-0.700933	0.170417	0.973209	0.848207	0.850786
chromosome	KZA74_12025	2,513,276..2,513,629	354	<=	helix-turn-helix transcriptional regulator	ytcD	ACX60_RS11740	ABUW_2589	A1S_1280	KZA74_12025	81.8391	0.210497	0.41029	-1.40142	0.97575	0.848207	0.00357332
chromosome	KZA74_05575	1,186,247..1,187,266	1020	=>	AraC family transcriptional regulator	NA	ACX60_RS05550	NA	A1S_2398	KZA74_05575	223.764	0.108834	0.371924	-0.759048	0.984557	0.848207	0.0863305
chromosome	dapB	47,008..47,829	822	=>	dapB, 4-hydroxy-tetrahydrodipicolinate reductase	dapB	ACX60_RS00190	ABUW_0039	A1S_3442	KZA74_00190	1209.95	0.0213027	-0.322234	-0.573787	0.991879	0.848207	0.138109
chromosome	rsmI	2,805,343..2,806,179	837	=>	rsmI, 16S rRNA(cytidine(1402)-2'-O)-methyltransferase	rsmI	ACX60_RS13135	ABUW_2847	A1S_1048	KZA74_13410	283.701	0.0248416	0.431043	0.368177	0.992114	0.848207	0.491505
chromosome	KZA74_12990	2,695,929..2,696,888	960	=>	metal-dependent hydrolase	NA	ACX60_RS12710	ABUW_2762	A1S_1128	KZA74_12990	209.806	0.0143859	0.483084	-0.598065	0.998363	0.848207	0.311495
chromosome	KZA74_04590	962,488..963,102	615	<=	RNA polymerase sigma factor	rpoE	ACX60_RS04565	ABUW_0988	A1S_2598	KZA74_04590	3762.82	-0.773602	-0.59528	1.1596	0.973209	0.848211	0.104049
chromosome	KZA74_18135	3,820,174..3,821,337	1164	<=	glycosyltransferase	gtr6	ACX60_RS17785	NA	A1S_0058	KZA74_18135	702.076	-1.01629	-0.626531	1.06753	0.973209	0.848211	0.157949
chromosome	tauA	2,330,895..2,331,935	1041	<=	tauA, taurine ABC transporter substrate-bindingprotein	tauA	ACX60_RS10925	ABUW_2382	A1S_1442	KZA74_11195	380.23	-0.108216	-0.296788	0.74449	0.978617	0.848241	0.031901
chromosome	KZA74_17405	3,662,088..3,662,909	822	<=	TorF family putative porin	torF	ACX60_RS17070	ABUW_3683	A1S_0202	KZA74_17405	319.737	0.00183735	0.330245	-0.293124	0.999942	0.848241	0.474453
chromosome	KZA74_07830	1,656,028..1,656,657	630	=>	NTP transferase domain-containing protein	mobA	ACX60_RS07780	ABUW_1707	A1S_2001	KZA74_07830	162.099	-0.283547	-0.288846	-1.47315	0.973209	0.849862	7.68665e-06
chromosome	KZA74_01765	370,116..370,691	576	<=	superoxide dismutase	SOD1	ACX60_RS01770	ABUW_0339	A1S_3143	KZA74_01765	894.45	-0.0101754	-0.433492	1.01984	0.999942	0.849862	0.0469669
pAB3	KZA74_19245	137,793..137,954	162	<=	feoA, ferrous iron transport protein A	NA	NA	NA	A1S_0652	KZA74_19245	32.2266	1.24997	0.425887	0.542523	0.25402	0.851052	0.283232
chromosome	KZA74_00965	217,240..218,217	978	=>	tdh, zinc binding dehydrogenase	tdh, qor, CRYZ	ACX60_RS00985	ABUW_0191	A1S_3293	KZA74_00965	810.999	-0.144843	-0.330028	-1.26623	0.97575	0.851135	0.000926751
chromosome	KZA74_11000	2,289,071..2,289,592	522	<=	DUF962 domain-containing protein	NA	ACX60_RS10730	ABUW_2343	A1S_1480	KZA74_11000	136.78	0.323027	0.453281	-2.43194	0.973209	0.851553	3.89981e-06
chromosome	KZA74_02040	431,225..432,097	873	=>	tesB, Acyl-CoA thioesterase 2	tesB	ACX60_RS02045	ABUW_0396	A1S_3090	KZA74_02040	1512.26	-0.117689	-0.360084	1.75492	0.980598	0.851553	1.87448e-05
chromosome	KZA74_08510	1,791,034..1,791,447	414	=>	YeeE/YedE family protein	K07112	ACX60_RS08450	ABUW_1846	A1S_1877	KZA74_08510	119.006	0.761902	0.366813	-1.62024	0.876491	0.851967	0.000164266
chromosome	genX	917,565..918,539	975	=>	genX, EF-P lysine aminoacylase GenX	epmA, poxA	ACX60_RS04375	ABUW_0948	A1S_2636	KZA74_04395	669.04	-0.264937	-0.302521	-0.219535	0.973209	0.851967	0.569808
chromosome	KZA74_13470	2,815,058..2,815,342	285	=>	zapA, cell division protein ZapA	zapA	ACX60_RS13195	ABUW_2859	A1S_1036	KZA74_13470	267.086	-0.519109	-0.397886	0.836543	0.973209	0.851967	0.0777911
chromosome	KZA74_13670	2,857,103..2,857,234	132	<=	KZA74_13670	NA	NA	NA	NA	KZA74_13670	174.874	-0.440559	-0.484115	2.12203	0.973209	0.851967	0.000110181
chromosome	KZA74_15830	3,323,670..3,324,215	546	<=	DUF3261 domain-containing protein	NA	ACX60_RS15505	NA	A1S_0521	KZA74_15830	224.871	-0.261071	-0.338965	-0.558967	0.973209	0.851967	0.175098
chromosome	KZA74_12500	2,610,701..2,611,045	345	=>	KZA74_12500	NA	ACX60_RS12220	ABUW_2724	A1S_3626	KZA74_12500	7538.78	-0.500268	-0.873089	1.01352	0.97575	0.851967	0.348906
chromosome	KZA74_17500	3,685,436..3,685,840	405	<=	helix-turn-helix domain-containing protein	NA	ACX60_RS17165	ABUW_3705	A1S_0181	KZA74_17500	129.116	-0.187538	0.362739	-1.82794	0.97575	0.851967	1.44537e-05
pAB2	KZA74_19400	1867..2070	204	<=	KZA74_19400	NA	NA	NA	NA	KZA74_19400	302.372	0.112025	0.404533	-0.280705	0.986689	0.851967	0.589645
chromosome	KZA74_06060	1,303,686..1,304,471	786	=>	ABC transporter substrate-binding protein	hisJ	ACX60_RS06030	ABUW_1339	A1S_2302	KZA74_06060	247.456	-0.023588	-0.341217	-1.06309	0.991879	0.851967	0.00805975
chromosome	KZA74_10700	2,229,161..2,229,601	441	=>	MaoC family dehydratase	NA	ACX60_RS10430	ABUW_2281	A1S_1534	KZA74_10700	207.824	-0.941704	-0.297262	0.171354	0.214848	0.853057	0.655652
chromosome	KZA74_04415	923,086..923,310	225	=>	KZA74_04415	NA	ACX60_RS04395	ABUW_0952	A1S_3821	KZA74_04415	145.899	-0.798949	-0.260491	0.882378	0.296183	0.853057	0.00312562
chromosome	tolA	967,457..968,860	1404	<=	tolA, cell envelope integrity protein TolA	tolA	ACX60_RS04595	ABUW_0994	A1S_2593	KZA74_04620	1129.56	-0.718086	-0.255545	-0.304211	0.364864	0.853057	0.345053
chromosome	ssb	222,661..223,242	582	=>	ssb, single-stranded DNA-binding protein	ssb	ACX60_RS01015	ABUW_0197|ABUW_0542	A1S_3287	KZA74_00995	3735.1	1.68557	-0.684281	0.463556	0.578762	0.853057	0.605388
pAB3	KZA74_19210	129,587..129,880	294	=>	KZA74_19210	NA	NA	NA	NA	KZA74_19210	56.9087	0.906222	0.428913	2.13522	0.884719	0.853057	8.65432e-06
chromosome	pncA	66,199..66,843	645	=>	pncA, bifunctional nicotinamidase/pyrazinamidase	pncA	ACX60_RS00305	ABUW_0062	A1S_3422	KZA74_00310	419.907	-0.164144	-0.248193	0.332907	0.973209	0.853057	0.282226
chromosome	hutI	86,971..88,176	1206	=>	hutI, imidazolonepropionase	hutI, AMDHD1	ACX60_RS00395	ABUW_0080	A1S_3403	KZA74_00400	4630.57	-1.08696	-0.661329	0.624401	0.973209	0.853057	0.458794
chromosome	KZA74_02760	559,423..560,106	684	<=	cusR, heavy metal response regulator transcriptionfactor	cusR, copR, silR	ACX60_RS02760	ABUW_1506|ABUW_3323	A1S_2937	KZA74_02760	301.903	0.556531	0.395733	0.0105527	0.973209	0.853057	0.984136
chromosome	KZA74_03440	708,391..708,927	537	=>	cheW, chemotaxis protein CheW	pilI	ACX60_RS03435	ABUW_0680	A1S_2813	KZA74_03440	202.81	0.260637	0.358479	-1.64096	0.973209	0.853057	0.00011206
chromosome	KZA74_03695	761,394..762,392	999	=>	NAD(P)H-quinone oxidoreductase	NA	ACX60_RS03685	ABUW_0731	A1S_2766	KZA74_03695	787.589	-0.144676	-0.223589	0.086898	0.973209	0.853057	0.765275
chromosome	KZA74_04280	894,827..894,916	90	=>	tRNA-Ser	NA	NA	NA	A1S_2652	KZA74_04280	51.4401	0.572521	0.408621	-2.77189	0.973209	0.853057	7.02882e-08
chromosome	leuE	1,560,932..1,561,582	651	<=	leuE, leucine efflux protein LeuE	leuE	ACX60_RS07260	ABUW_1670	A1S_2066	KZA74_07295	241.413	0.31586	0.275841	0.353644	0.973209	0.853057	0.297949
chromosome	KZA74_10130	2,130,217..2,131,074	858	<=	3'(2'),5'-bisphosphate nucleotidase CysQ	cysQ, MET22, BPNT1	ACX60_RS09865	ABUW_2218	A1S_1615	KZA74_10130	705.923	-0.485038	-0.430967	0.368495	0.973209	0.853057	0.498664
chromosome	KZA74_10195	2,147,318..2,147,740	423	=>	biopolymer transporter ExbD	exbD	ACX60_RS09925	ABUW_2231	A1S_1604	KZA74_10195	72.8971	0.356181	0.349849	-0.0857029	0.973209	0.853057	0.851764
chromosome	KZA74_10675	2,223,780..2,224,088	309	=>	metalloregulator ArsR/SmtB family transcriptionfactor	NA	ACX60_RS10405	ABUW_2276	A1S_1539	KZA74_10675	131.189	0.34754	0.364899	-0.316631	0.973209	0.853057	0.493984
chromosome	KZA74_11430	2,375,311..2,375,595	285	<=	N-acetyltransferase	K06975	ACX60_RS11145	ABUW_2425	A1S_1395	KZA74_11430	269.286	-0.537176	-0.326186	0.545988	0.973209	0.853057	0.173464
chromosome	KZA74_13055	2,711,818..2,712,510	693	<=	GntR family transcriptional regulator	vanR	ACX60_RS12775	ABUW_2775	A1S_1114	KZA74_13055	375.301	-0.463857	-0.288989	-0.957194	0.973209	0.853057	0.00518968
chromosome	KZA74_14080	2,950,359..2,951,065	707	<=	DUF1275 domain-containing protein	NA	ACX60_RS13775	ABUW_2978	A1S_0919	KZA74_14080	258.102	0.345448	0.548507	-3.54561	0.973209	0.853057	3.40539e-08
chromosome	ispE	3,040,278..3,041,111	834	=>	ispE, 4-(cytidine5'-diphospho)-2-C-methyl-D-erythritol kinase	ispE	ACX60_RS14195	ABUW_3092	A1S_0834	KZA74_14510	1205.98	-0.350063	-0.452049	1.71794	0.973209	0.853057	0.00132618
chromosome	KZA74_14750	3,086,491..3,087,831	1341	<=	KZA74_14750	NA	ACX60_RS14435	ABUW_3141	A1S_0785	KZA74_14750	1632.66	-0.756319	-0.388503	-0.589882	0.973209	0.853057	0.223286
chromosome	KZA74_17230	3,626,359..3,626,994	636	=>	response regulator	gacA	ACX60_RS16900	ABUW_3639	A1S_0236	KZA74_17230	1261.53	-0.270547	-0.41787	0.757382	0.973209	0.853057	0.140893
chromosome	KZA74_17855	3,757,106..3,757,522	417	=>	DUF4902 domain-containing protein	abaM	ACX60_RS17520	ABUW_3775	A1S_0110	KZA74_17855	113.184	0.477446	0.509549	-1.24532	0.973209	0.853057	0.0442846
chromosome	KZA74_18360	3,864,327..3,867,219	2893	<=	23S ribosomal RNA	23s	NA	NA	A1S_r	KZA74_18360	41.1673	1.23491	0.753744	-5.53264	0.973209	0.853057	1.64396e-06
chromosome	rpmH	3,901,315..3,901,449	135	<=	rpmH, 50S ribosomal protein L34	rmpH, RP-L34, MRPL34	ACX60_RS18190	ABUW_3906	A1S_2984	KZA74_18540	1105.79	0.527448	-0.58067	4.39935	0.973209	0.853057	3.04135e-11
chromosome	KZA74_17765	3,734,826..3,735,263	438	<=	DoxX family protein	K15977, doxX	ACX60_RS17430	ABUW_3757	A1S_0128	KZA74_17765	385.17	0.153602	-0.257236	-1.61106	0.974056	0.853057	6.48052e-08
chromosome	KZA74_09880	2,076,431..2,076,733	303	=>	DUF1634 domain-containing protein	NA	ACX60_RS09615	ABUW_2168	A1S_3712	KZA74_09880	64.1209	0.268098	0.557368	-1.25233	0.97575	0.853057	0.0638573
chromosome	ligA	3,066,510..3,068,546	2037	<=	bfr,bacterioferritin	bfr	ACX60_RS14360	ABUW_3125	A1S_0800	KZA74_14675	6959.57	-0.400756	-0.801775	0.263419	0.97575	0.853057	0.802773
chromosome	lgt	3,390,603..3,391,421	819	=>	lgt, prolipoprotein diacylglyceryl transferase	lgt, umpA	ACX60_RS15795	ABUW_3417	A1S_0460	KZA74_16120	623.646	0.108523	-0.199164	-0.255807	0.97575	0.853057	0.301346
pAB3	KZA74_18960	83,603..83,887	285	=>	KZA74_18960	NA	NA	NA	A1S_3528	KZA74_18960	330.627	0.278995	-0.647145	0.772941	0.97575	0.853057	0.340487
chromosome	basJ	1,220,907..1,222,076	1170	=>	basJ, acinetobactin biosynthesis isochorismatesynthase BasJ	basJ	ACX60_RS05680	ABUW_1188	A1S_2372	KZA74_05710	225.188	0.148659	0.464893	-1.58792	0.981995	0.853057	0.0041262
chromosome	KZA74_16265	3,415,661..3,416,293	633	=>	LysE family translocator	NA	ACX60_RS15940	ABUW_3446	A1S_0432	KZA74_16265	238.163	0.12956	0.428069	-0.314835	0.984383	0.853057	0.569808
chromosome	KZA74_00255	57,144..57,506	363	<=	HIT hydrolase	HIT	ACX60_RS00250	ABUW_0051	A1S_3431	KZA74_00255	745.756	-0.126914	-0.466961	1.93787	0.986689	0.853057	0.000378667
chromosome	KZA74_07180	1,537,213..1,537,551	339	=>	KZA74_07180	NA	ACX60_RS07150	ABUW_1641	NA	KZA74_07180	41.7681	0.12597	0.472724	-2.72774	0.987406	0.853057	3.03771e-06
chromosome	recO	1,052,400..1,053,113	714	=>	recO, DNA repair protein RecO	recO	ACX60_RS04980	ABUW_1035	A1S_2517	KZA74_04995	364.966	-0.0514965	-0.202182	0.388275	0.988308	0.853057	0.113686
chromosome	dksA	3,613,539..3,614,075	537	=>	dksA, RNA polymerase-binding protein DksA	dksA	ACX60_RS16840	ABUW_3627	A1S_0248	KZA74_17170	3045.45	-0.128404	-0.667725	1.24193	0.988793	0.853057	0.13181
chromosome	astE	386,225..387,199	975	=>	astE, succinylglutamate desuccinylase	astE	ACX60_RS01840	ABUW_0355	A1S_3128	KZA74_01835	884.147	-0.0439099	-0.439643	-0.632333	0.991879	0.853057	0.249626
chromosome	fur	2,980,625..2,981,062	438	<=	fur, ferric iron uptake transcriptional regulator	fur, zur, furB	ACX60_RS13905	ABUW_3033	A1S_0895	KZA74_14215	1056.52	0.0183944	-0.45157	1.6766	0.995974	0.853057	0.00175015
chromosome	KZA74_17725	3,727,339..3,728,007	669	<=	glutathione S-transferase	GST, gst	ACX60_RS17390	ABUW_3749	A1S_0136	KZA74_17725	343.412	0.442196	0.196284	1.52646	0.807483	0.85324	4.29517e-12
chromosome	KZA74_14665	3,062,805..3,064,235	1431	=>	trehalose-6-phosphate synthase	otsA	ACX60_RS14350	ABUW_3123	A1S_0803	KZA74_14665	1074.2	-0.771612	-0.555084	-0.567629	0.973209	0.853292	0.420468
chromosome	KZA74_00815	179,097..179,894	798	=>	MBL fold metallo-hydrolase	NA	ACX60_RS00835	ABUW_0160	A1S_3323	KZA74_00815	272.472	0.161285	0.347765	-0.670676	0.97575	0.853292	0.119554
chromosome	KZA74_15290	3,206,650..3,208,098	1449	<=	RNA polymerase factor sigma-54	rpoN	ACX60_RS14975	ABUW_3253	A1S_0682	KZA74_15290	2101.28	-0.640891	-0.517521	1.36554	0.973209	0.853622	0.0300754
pAB3	KZA74_18640	13,450..13,935	486	=>	KZA74_18640	NA	NA	NA	NA	KZA74_18640	648.549	-1.20011	-0.649174	-0.33191	0.973209	0.853622	0.699137
chromosome	KZA74_06165	1,324,553..1,324,825	273	=>	YeaC family protein	yeaC, K09916	ACX60_RS06135	ABUW_1360	A1S_2282	KZA74_06165	447.038	-0.00734608	-0.5565	1.02064	0.999942	0.853622	0.139564
chromosome	astD	383,382..384,851	1470	=>	astD, succinylglutamate-semialdehyde dehydrogenase	astD	ACX60_RS01830	ABUW_0353	A1S_3130	KZA74_01825	1747.32	-0.141086	-0.426164	-0.929727	0.980598	0.85438	0.0762477
chromosome	KZA74_07530	1,604,594..1,605,031	438	=>	antitermination protein	NA	ACX60_RS07495	NA	A1S_3768	KZA74_07530	61.2203	-0.0509864	0.478521	-2.81889	0.991879	0.856274	1.6423e-06
chromosome	KZA74_09960	2,092,944..2,093,714	771	<=	(2Fe-2S)-binding protein	bfnH	ACX60_RS09695	ABUW_2184	A1S_1653	KZA74_09960	126.112	0.244477	0.478118	0.927782	0.97575	0.856544	0.116993
chromosome	KZA74_04400	918,598..919,578	981	<=	39S ribosomal protein L45	NA	ACX60_RS04380	ABUW_0949	A1S_2635	KZA74_04400	9471.8	0.49368	-0.696106	2.19602	0.973209	0.856961	0.00916639
chromosome	KZA74_10950	2,278,003..2,278,896	894	<=	amino acid ABC transporter substrate-bindingprotein	gltI, aatJ	ACX60_RS10680	ABUW_2333	A1S_1490	KZA74_10950	1940.48	-0.329428	-0.523677	0.863026	0.973209	0.857384	0.190542
chromosome	KZA74_15700	3,296,294..3,296,866	573	=>	TetR/AcrR family transcriptional regulator	NA	ACX60_RS15375	ABUW_3352	A1S_0548	KZA74_15700	366.204	-1.04981	-0.551812	0.0799373	0.973209	0.857384	0.91627
chromosome	prmC	1,458,015..1,458,836	822	=>	prmC, peptide chain release factor N(5)-glutamine methyltransferase	hemK, prmC, HEMK	ACX60_RS06810	ABUW_1568	A1S_2153	KZA74_06840	382.87	-0.706023	-0.310741	0.0513222	0.807201	0.85895	0.904661
chromosome	KZA74_00735	159,502..159,714	213	<=	DUF1737 domain-containing protein	NA	ACX60_RS00755	ABUW_0144	A1S_3338	KZA74_00735	49.5725	0.520216	0.36577	0.423167	0.973209	0.85895	0.35439
chromosome	bfmS	3,126,598..3,128,247	1650	<=	bfmS, sensor histidine kinase BfmS	bfmS	ACX60_RS14630	ABUW_3180	A1S_0749	KZA74_14945	2932.56	-0.356098	-0.551568	0.333357	0.973209	0.85895	0.652389
chromosome	KZA74_07000	1,498,425..1,498,868	444	<=	GNAT family N-acetyltransferase	NA	ACX60_RS06970	ABUW_1603	A1S_2119	KZA74_07000	169.716	0.156438	0.307681	0.536014	0.97575	0.85895	0.162103
pAB3	KZA74_18680	20,093..20,320	228	=>	zeta toxin family protein, FicA family protein	NA	NA	NA	A1S_0015	KZA74_18680	14188.3	-0.0933081	-0.815723	1.59274	0.991879	0.85895	0.119206
chromosome	KZA74_17930	3,774,242..3,774,709	468	=>	Lrp/AsnC ligand binding domain-containingprotein	lrp	ACX60_RS17595	ABUW_3790	A1S_0094	KZA74_17930	213.773	0.639534	0.583082	-1.66198	0.973209	0.859363	0.0206166
pAB3	KZA74_19065	104,156..104,416	261	=>	KZA74_19065	NA	NA	NA	NA	KZA74_19065	140.299	0.819082	-0.404712	0.503653	0.966368	0.862627	0.325061
chromosome	coaBC	587,667..588,920	1254	=>	coaBC, bifunctional phosphopantothenoylcysteine decarboxylase/phosphopantothenate--cysteine ligase CoaBC	coaBC, dfp	ACX60_RS02890	ABUW_0529	A1S_2917	KZA74_02895	901.391	-0.266491	-0.27188	-0.518269	0.973209	0.862627	0.130263
chromosome	KZA74_04345	907,239..908,102	864	<=	metal-dependent hydrolase	K07044	ACX60_RS04325	NA	A1S_2646	KZA74_04345	163.9	0.147309	0.500245	-2.54456	0.986689	0.862627	2.5395e-05
chromosome	KZA74_03560	732,146..733,117	972	=>	patatin-like phospholipase family protein	K07001	ACX60_RS03550	ABUW_0705	A1S_2792	KZA74_03560	813.009	-0.196422	-0.176516	0.0690482	0.973209	0.8634	0.769933
chromosome	KZA74_05390	1,144,080..1,144,721	642	<=	DUF2238 domain-containing protein	yjdF	ACX60_RS05365	ABUW_1121	A1S_2442	KZA74_05390	177.774	0.424443	0.472749	-0.51097	0.973209	0.8634	0.402362
chromosome	KZA74_09600	2,021,930..2,022,538	609	<=	NAD(P)H-dependent oxidoreductase	acpD, azoR	ACX60_RS09335	ABUW_2116	A1S_1715	KZA74_09600	153.082	-0.908615	-0.484576	-1.41872	0.973209	0.8634	0.017301
chromosome	KZA74_12495	ND	ND	ND	ahpF, alkyl hydroperoxide reductase subunit F	ahpF	ACX60_RS12215	ABUW_2723	A1S_1200	KZA74_12495	649.512	-0.294211	-0.29885	-0.868188	0.973209	0.863581	0.0183004
chromosome	KZA74_16650	3,505,164..3,505,670	507	=>	KZA74_16650	NA	ACX60_RS16325	ABUW_3524	A1S_0353	KZA74_16650	593.599	0.0580839	-0.431892	0.767158	0.991879	0.863581	0.1608
chromosome	infC	3,245,988..3,246,539	552	<=	infC, translation initiation factor IF-3	infC, MTIF3	ACX60_RS15160	ABUW_3289	A1S_0593	KZA74_15480	4829.95	0.226004	-0.626302	1.36692	0.978912	0.863621	0.081737
pAB3	KZA74_19110	110,907..111,485	579	=>	KZA74_19110	NA	NA	NA	A1S_3543	KZA74_19110	2181.92	0.144395	-0.792619	1.92359	0.9888	0.863621	0.0515155
chromosome	KZA74_04155	866,275..868,038	1764	=>	alkaline phosphatase D family protein	phoD	ACX60_RS04135	ABUW_0904	A1S_2677	KZA74_04155	476.118	0.338534	0.461011	-2.82426	0.973209	0.863766	2.93812e-07
chromosome	KZA74_04245	888,015..888,590	576	=>	DUF4112 domain-containing protein	NA	ACX60_RS04225	ABUW_0923	A1S_2659	KZA74_04245	988.058	-0.111205	-0.296374	1.23088	0.978617	0.863766	0.000576521
chromosome	csuB	1,389,633..1,390,151	519	=>	csuB, Csu fimbrial biogenesis protein CsuB	csuB	ACX60_RS06490	ABUW_1489	A1S_2216	KZA74_06520	76.258	2.39939	0.720606	-3.96573	0.159691	0.864665	3.21731e-05
chromosome	KZA74_01285	270,227..270,775	549	<=	DUF805 domain-containing protein	NA	ACX60_RS01300	ABUW_0248	A1S_3236	KZA74_01285	377.66	0.204428	0.204656	1.23355	0.973209	0.864665	2.44834e-07
chromosome	KZA74_01855	390,415..390,846	432	<=	KZA74_01855	NA	ACX60_RS01860	ABUW_0359	A1S_3125	KZA74_01855	259.732	0.45734	0.407787	1.12939	0.973209	0.864665	0.025653
chromosome	KZA74_04990	1,052,190..1,052,390	201	=>	NF038104 family lipoprotein	NA	ACX60_RS04975	ABUW_1034	A1S_3812	KZA74_04990	296.544	-0.380837	-0.506005	0.930801	0.973209	0.864665	0.149073
chromosome	KZA74_05075	1,068,168..1,068,755	588	=>	lipocalin family protein	APOD	ACX60_RS05055	ABUW_1048	A1S_2503	KZA74_05075	832.37	-0.259403	-0.413162	0.664025	0.973209	0.864665	0.21017
chromosome	KZA74_06115	1,313,321..1,314,589	1269	<=	DUF4010 domain-containing protein	NA	ACX60_RS06085	ABUW_1350	A1S_2291	KZA74_06115	442.876	-0.424287	-0.2684	-1.43565	0.973209	0.864665	8.59605e-06
chromosome	pfkB	1,716,413..1,717,360	948	<=	pfkB, 1-phosphofructokinase	fruK, lacC, pfkB	ACX60_RS08085	ABUW_1771	A1S_1946	KZA74_08145	304.22	-0.400643	-0.270458	0.636002	0.973209	0.864665	0.0580117
chromosome	KZA74_08875	1,867,112..1,867,843	732	=>	GntR family transcriptional regulator	K03710	ACX60_RS08820	ABUW_1924	A1S_1807	KZA74_08875	330.649	-0.480075	-0.240704	0.416471	0.973209	0.864665	0.171904
chromosome	arsB	2,318,634..2,319,668	1035	<=	arsB, ACR3 family arsenite efflux transporter	ACR3, arsB	ACX60_RS10860	ABUW_2369|ABUW_3670	A1S_1454	KZA74_11130	206.092	0.507063	0.448354	-2.43136	0.973209	0.864665	8.13065e-06
chromosome	mdcE	2,347,684..2,348,511	828	<=	mdcE, biotin-independent malonate decarboxylasesubunit gamma	mdcE	ACX60_RS11000	ABUW_2398	A1S_1425	KZA74_11270	287.047	-0.492693	-0.354834	-3.1148	0.973209	0.864665	2.5021e-13
chromosome	gspK	2,199,268..2,200,227	960	<=	gspK,type II secretion system minor pseudopilin GspK	gspK	ACX60_RS10270	ABUW_2249	A1S_1565	KZA74_10540	396.876	-0.11867	0.21257	-0.14779	0.97575	0.864665	0.60551
chromosome	rsmH	307,029..307,952	924	=>	rsmH, 16S rRNA (cytosine(1402)-N(4))-methyltransferaseRsmH	mraW, rsmH	ACX60_RS01480	ABUW_0281	A1S_3206	KZA74_01470	855.03	-0.0701206	-0.205978	0.619406	0.980598	0.864665	0.0142277
chromosome	galE	1,667,821..1,668,828	1008	=>	galE, UDP-glucose 4-epimerase GalE	galE, GALE	ACX60_RS07850	ABUW_1721	A1S_1987	KZA74_07900	1760.91	0.114408	-0.543813	0.899346	0.988413	0.864665	0.197951
chromosome	KZA74_06975	1,494,712..1,495,506	795	=>	DUF4198 domain-containing protein	NA	ACX60_RS06945	ABUW_1598	A1S_2123	KZA74_06975	101.321	0.00742961	0.341642	-0.409239	0.999942	0.864665	0.355953
chromosome	KZA74_15170	3,182,657..3,183,052	396	<=	KZA74_15170	NA	ACX60_RS14855	ABUW_3229	A1S_3560	KZA74_15170	540.026	-0.562037	-0.418278	0.563956	0.973209	0.864728	0.298468
chromosome	KZA74_04870	1,030,046..1,030,462	417	<=	KZA74_04870	NA	ACX60_RS04855	ABUW_1011	A1S_2543	KZA74_04870	2873.46	-0.229015	-0.632399	1.05882	0.979122	0.864728	0.193948
chromosome	KZA74_01900	399,432..400,616	1185	=>	tetA, MFS efflux pump	tetA	ACX60_RS01905	ABUW_0368	A1S_3117	KZA74_01900	427.393	0.605968	0.47301	-2.56424	0.973209	0.866984	8.19534e-06
chromosome	KZA74_02015	423,757..424,392	636	<=	comF, DNA transformation protein	comF	ACX60_RS02020	ABUW_0391	A1S_3096	KZA74_02015	220.39	-0.312856	-0.216249	-1.69167	0.973209	0.866984	8.33179e-11
chromosome	KZA74_16960	3,571,908..3,572,786	879	<=	alpha/beta fold hydrolase	a/b hydrolase	ACX60_RS16630	ABUW_3585	A1S_0290	KZA74_16960	469.21	0.374669	0.250999	0.779747	0.973209	0.866984	0.012036
chromosome	KZA74_00175	44,767..45,144	378	=>	KZA74_00175	NA	ACX60_RS00175	ABUW_0036	A1S_3444	KZA74_00175	290.648	0.244747	0.238024	1.03026	0.973209	0.867939	0.000342809
chromosome	KZA74_00295	63,602..64,321	720	<=	purC, phosphoribosylaminoimidazolesuccinocarboxamidesynthase	purC	ACX60_RS00290	ABUW_0059	A1S_3425	KZA74_00295	1357.9	0.255432	-0.336023	2.84884	0.973209	0.867939	9.71092e-13
chromosome	KZA74_05340	1,129,818..1,131,248	1431	=>	aldehyde dehydrogenase family protein	NA	ACX60_RS05315	ABUW_1111	A1S_2452	KZA74_05340	6475.73	-0.671722	-1.04524	-1.86163	0.973209	0.867939	0.168948
chromosome	KZA74_08270	1,738,069..1,738,263	195	<=	KZA74_08270, 5'UTR of cydA maybe	NA	ACX60_RS08210	ABUW_1796	NA	KZA74_08270	182.197	0.737695	0.441891	4.91586	0.973209	0.867939	5.87645e-23
pAB3	KZA74_19150	121,260..121,661	402	<=	KZA74_19150	NA	NA	NA	A1S_3549	KZA74_19150	37.6135	0.60954	0.351757	0.259962	0.973209	0.867939	0.576247
chromosome	murD	3,616,332..3,617,678	1347	<=	murD, UDP-N-acetylmuramoyl-L-alanine--D-glutamateligase	murD	ACX60_RS16855	ABUW_3630	A1S_0245	KZA74_17185	806.683	0.0123764	-0.201916	0.109779	0.992114	0.867939	0.690384
chromosome	KZA74_00650	143,131..143,856	726	<=	tsx ion channel	tsx	ACX60_RS00670	ABUW_0128	A1S_3355	KZA74_00650	362.779	-0.312763	-0.301382	1.03764	0.973209	0.868096	0.00521714
chromosome	KZA74_09510	2,001,086..2,002,495	1410	=>	TIGR00366 family protein	atoE	ACX60_RS09245	ABUW_2098	A1S_1730	KZA74_09510	1072.67	-0.61359	-0.508457	-1.856	0.973209	0.868096	0.00338293
chromosome	rluD	3,032,293..3,033,345	1053	<=	rluD, 23S rRNA pseudouridine(1911/1915/1917) synthaseRluD	rluD	ACX60_RS14165	ABUW_3086	A1S_0841	KZA74_14480	956.222	-0.309342	-0.262205	0.49733	0.973209	0.868096	0.140893
chromosome	crp	2,630,027..2,630,734	708	=>	crp, cAMP-activated global transcriptional regulatorCRP	crp	ACX60_RS12305	ABUW_2741	A1S_1182	KZA74_12590	1055.91	-0.134451	-0.273401	2.07066	0.97575	0.868096	2.05989e-10
chromosome	aroD	1,783,193..1,784,020	828	=>	aroD, type I 3-dehydroquinate dehydratase	quiD, aroD	ACX60_RS08420	ABUW_1840	A1S_1883	KZA74_08480	239.37	-1.41677	-0.40316	-3.21146	0.138065	0.86872	6.10408e-11
chromosome	KZA74_11075	2,302,993..2,304,300	1308	=>	dicarboxylate/amino acid:cation symporter	bioB	ACX60_RS10805	ABUW_2358	A1S_1467	KZA74_11075	1139.28	-0.616448	-0.323021	1.71976	0.973209	0.86872	1.16688e-05
chromosome	KZA74_14270	2,990,989..2,991,642	654	<=	OmpA family protein	NA	ACX60_RS13960	ABUW_3045	A1S_0884	KZA74_14270	5840.46	-0.735643	-0.894634	0.133005	0.973209	0.86872	0.916369
pAB3	KZA74_19160	121,987..122,616	630	<=	thermonuclease family protein	NA	NA	NA	A1S_0648	KZA74_19160	68.5938	0.73659	0.388972	-0.0671463	0.973209	0.86872	0.903491
chromosome	KZA74_00930	205,094..206,809	1716	=>	actP, cation acetate symporter	actP	ACX60_RS00950	ABUW_0184	A1S_3300	KZA74_00930	8941.36	-0.363169	-0.762513	-1.8211	0.97575	0.86872	0.0610752
chromosome	KZA74_09315	1,961,932..1,963,491	1560	=>	clsC_2, phospholipase D family protein	clsC_2	NA	NA	NA	KZA74_09315	578.185	-0.596642	-0.265662	0.645125	0.870139	0.870021	0.0566143
chromosome	pstA	1,138,145..1,139,542	1398	=>	pstA, phosphate ABC transporter permease PstA	pstA	ACX60_RS05345	ABUW_1117	A1S_2446	KZA74_05370	1116.79	-0.718118	-0.404992	1.78374	0.973209	0.870021	0.000365583
chromosome	KZA74_06910	1,474,884..1,475,600	717	=>	response regulator transcription factor	kdpE	ACX60_RS06880	ABUW_1585	A1S_2137	KZA74_06910	267.064	-0.496949	-0.264141	-0.508132	0.973209	0.870021	0.138139
chromosome	KZA74_09010	1,896,459..1,897,853	1395	=>	methylenetetrahydrofolate reductase C-terminal domain-containing protein	metF, MTHFR	ACX60_RS08955	ABUW_1945	A1S_1777	KZA74_09010	369.643	-0.545021	-0.349064	-1.36632	0.973209	0.870021	0.00173316
chromosome	KZA74_08500	1,790,013..1,790,480	468	=>	KZA74_08500	NA	ACX60_RS08440	ABUW_1844	A1S_1879	KZA74_08500	515.962	-0.259894	-0.433838	2.4701	0.97575	0.870021	2.68786e-06
chromosome	KZA74_11495	2,391,647..2,392,126	480	=>	CinA family protein	cinA, pncC	ACX60_RS11210	ABUW_2438	A1S_1384	KZA74_11495	26.704	0.282719	0.49849	-2.74365	0.97575	0.870021	4.45317e-05
chromosome	KZA74_11725	2,442,824..2,444,362	1539	<=	3-hydroxyacyl-CoA dehydrogenase	paaH, hbd, fadB, mmgB	ACX60_RS11440	ABUW_2528	A1S_1343	KZA74_11725	3339.49	-0.560238	-1.08276	-1.74911	0.97575	0.870021	0.217762
chromosome	tusD	1,667,387..1,667,755	369	<=	tusD, sulfurtransferase complex subunit TusD	tusD, dsrE	ACX60_RS07845	ABUW_1720	A1S_1988	KZA74_07895	1032.86	0.154566	-0.537778	-2.31522	0.986689	0.870021	0.000535664
pAB1	KZA74_19320	3631..4242	612	<=	recombinase family protein	NA	NA	NA	NA	KZA74_19320	901.728	0.110648	0.486963	-1.35392	0.988413	0.870021	0.0290373
chromosome	icd	1,099,418..1,100,674	1257	=>	icd, NADP-dependent isocitrate dehydrogenase	IDH1, IDH2, icd	ACX60_RS05185	ABUW_1074	A1S_2475	KZA74_05205	2355.36	0.0629099	-0.642089	-1.10571	0.991879	0.870021	0.18778
chromosome	KZA74_08860	1,863,541..1,864,881	1341	<=	MFS transporter	ttuB_2	ACX60_RS08805	ABUW_1921	A1S_1810	KZA74_08860	329.533	0.189618	0.413602	-2.03779	0.97575	0.870531	7.24208e-05
chromosome	lolB	3,039,681..3,040,259	579	=>	lolB, lipoprotein insertase outer membrane proteinLolB	lolB	ACX60_RS14190	ABUW_3091	A1S_0835	KZA74_14505	280.721	-0.0201054	0.186633	0.774141	0.991879	0.870531	0.000687958
chromosome	KZA74_01165	251,801..252,358	558	=>	ywrO, general stress prot, NAD(P)H-dependent oxidoreductase	ywrO	ACX60_RS01180	ABUW_0228	A1S_3258	KZA74_01165	186.525	0.314493	0.403073	-1.93599	0.973209	0.87119	0.000123555
chromosome	KZA74_07250	1,552,908..1,553,351	444	<=	usp, universal stress protein	NA	ACX60_RS07220	ABUW_1661	A1S_2072	KZA74_07250	6233.88	0.0162263	-0.674883	0.850558	0.999942	0.872485	0.3447
chromosome	KZA74_06575	1,401,862..1,402,479	618	=>	paraquat-inducible protein A	pqiA	ACX60_RS06545	ABUW_1500	A1S_2206	KZA74_06575	238.014	-0.137073	-0.192318	-0.504773	0.973209	0.87316	0.0389151
chromosome	KZA74_14445	3,028,840..3,028,916	77	<=	tRNA-Met	trnM	ACX60_RS14140	ABUW_3081	A1S_0846	KZA74_14445	83.4821	0.322864	0.374292	-2.88839	0.973209	0.87316	2.50656e-09
chromosome	KZA74_15705	3,297,083..3,297,646	564	<=	TetR/AcrR family transcriptional regulator; helix-turn-helix transcriptional regulator	NA	ACX60_RS15380	ABUW_3353	A1S_0547	KZA74_15705	84.9604	0.417488	0.629193	-4.42656	0.973209	0.87316	9.50894e-08
chromosome	KZA74_02405	490,181..490,708	528	<=	KZA74_02405	NA	ACX60_RS02405	ABUW_0469	NA	KZA74_02405	1194.63	-0.182134	-0.480885	1.32128	0.978912	0.87316	0.0321579
chromosome	KZA74_12360	2,581,805..2,582,476	672	=>	helix-turn-helix domain-containing protein	NA	ACX60_RS12075	ABUW_2695	A1S_1225	KZA74_12360	266.965	0.59124	0.229196	0.422817	0.63421	0.873284	0.158439
chromosome	KZA74_00040	9774..10,778	1005	=>	RND transporter	NA	ACX60_RS00040	ABUW_0008	A1S_0008	KZA74_00040	372.407	0.273393	0.322347	-2.05589	0.973209	0.873284	2.75426e-07
chromosome	asd	112,525..113,376	852	=>	asd, psd, archaetidylserine decarboxylase	asd, psd, PISD	ACX60_RS00520	ABUW_0103	A1S_3378	KZA74_00520	1099.5	0.237205	-0.287519	1.25061	0.973209	0.873284	0.000490379
chromosome	KZA74_07415	1,591,277..1,591,546	270	<=	DNA-binding protein	NA	ACX60_RS07380	NA	NA	KZA74_07415	90.9578	0.51821	0.416595	-3.92182	0.973209	0.873284	3.17467e-12
chromosome	KZA74_11820	2,464,218..2,465,126	909	=>	EamA family transporter	TC.DME	ACX60_RS11535	ABUW_2550	A1S_1323	KZA74_11820	209.672	0.251252	0.396289	-2.3674	0.974056	0.873284	1.78323e-06
chromosome	KZA74_09080	1,912,671..1,913,111	441	<=	HD domain-containing protein	NA	ACX60_RS09025	ABUW_1957	A1S_3729	KZA74_09080	121.637	0.208165	0.383931	0.602848	0.97575	0.873284	0.235666
chromosome	paaC	2,447,540..2,448,295	756	<=	paaC, phenylacetate-CoA oxygenase subunit PaaC	paaC	ACX60_RS11465	ABUW_2533	A1S_1338	KZA74_11750	3954.49	-0.58916	-1.23712	-1.55502	0.97575	0.873284	0.348947
chromosome	KZA74_13890	2,908,893..2,910,089	1197	<=	KZA74_13890	NA	ACX60_RS13585	ABUW_2940	A1S_0959	KZA74_13890	314.2	0.269273	0.488215	-3.16142	0.97575	0.873284	2.09637e-07
chromosome	KZA74_04300	900,741..900,998	258	<=	YjhX family toxin	yjhX	ACX60_RS04280	NA	NA	KZA74_04300	70.6283	-0.0696988	0.329393	-0.233936	0.988793	0.873284	0.607151
chromosome	KZA74_07255	1,553,639..1,553,866	228	=>	KZA74_07255	NA	ACX60_RS07225	ABUW_1662	A1S_3783	KZA74_07255	45.7987	0.0235607	0.707444	-3.44489	0.998363	0.873284	0.000221654
chromosome	KZA74_18160	3,825,120..3,826,070	951	<=	Gfo/Idh/MocA family oxidoreductase	dgaA	ACX60_RS17810	NA	A1S_0053	KZA74_18160	1598.6	0.000332822	-0.502822	1.56527	0.999942	0.873284	0.014908
chromosome	KZA74_11540	2,397,851..2,399,134	1284	<=	TMF family protein	porin	ACX60_RS11255	ABUW_2448	A1S_1380	KZA74_11540	561.646	-0.610085	-0.408358	-3.19208	0.973209	0.873536	2.33296e-10
chromosome	bioB	2,254,370..2,255,359	990	=>	bioB, biotin synthase BioB	bioB	ACX60_RS10555	ABUW_2307	A1S_1511	KZA74_10825	1649.71	-0.0261401	-0.512574	1.03146	0.994309	0.873914	0.12704
chromosome	KZA74_04850	1,027,434..1,028,024	591	=>	nicotinate-nicotinamide nucleotideadenylyltransferase	NA	ACX60_RS04835	ABUW_1007	A1S_2547	KZA74_04850	216.043	0.18551	0.229529	0.999683	0.973209	0.874317	0.000447952
chromosome	KZA74_06250	1,343,962..1,344,585	624	=>	metal-dependent hydrolase	NA	ACX60_RS06220	NA	A1S_2266	KZA74_06250	204.862	-0.499758	-0.228804	0.506615	0.973209	0.874317	0.0845444
chromosome	yddG	1,407,105..1,408,016	912	<=	yddG, aromatic amino acid DMT transporter YddG	yddG	ACX60_RS06575	ABUW_1520	A1S_2201	KZA74_06605	178.397	-0.290741	0.291229	-0.496516	0.973209	0.874317	0.201423
chromosome	KZA74_11665	2,431,175..2,431,747	573	<=	cytochrome b/b6, b561 domain-containing protein	NA	ACX60_RS11380	ABUW_2503	A1S_1352	KZA74_11665	252.789	-0.419454	-0.252686	-1.16225	0.973209	0.874317	0.000253145
chromosome	KZA74_13225	2,751,873..2,752,232	360	=>	KZA74_13225	NA	ACX60_RS12945	ABUW_2809	A1S_1082	KZA74_13225	359.19	-0.48244	-0.298518	0.782237	0.973209	0.874317	0.0423134
chromosome	bioD	3,056,942..3,057,598	657	<=	bioD, dethiobiotin synthase	bioD	ACX60_RS14320	ABUW_3117	A1S_0809	KZA74_14635	234.834	0.293102	0.304357	-0.528905	0.973209	0.874317	0.191832
chromosome	KZA74_12160	2,543,797..2,544,357	561	<=	TetR/AcrR family transcriptional regulator	NA	ACX60_RS11870	ABUW_2629	A1S_1256	KZA74_12160	68.6735	-0.0653203	0.522694	-3.22401	0.991879	0.874317	2.15555e-06
chromosome	KZA74_12620	2,636,166..2,637,191	1026	<=	glyceraldehyde-3-phosphate dehydrogenase	epd, GAPDH, gapA	ACX60_RS12335	ABUW_2747	A1S_1177	KZA74_12620	382.569	-0.40543	-0.222635	-0.0921987	0.973209	0.874632	0.768436
chromosome	KZA74_14365	3,010,610..3,011,935	1326	<=	EcsC family protein	NA	ACX60_RS14055	ABUW_3064	A1S_0865	KZA74_14365	2127.27	-0.626103	-0.491563	0.360969	0.973209	0.874632	0.601552
chromosome	KZA74_17235	3,627,005..3,628,573	1569	=>	PAS domain-containing sensor histidine kinase	pilS, pehS	ACX60_RS16905	ABUW_3640	A1S_0235	KZA74_17235	388.542	0.0652795	0.315837	-0.531533	0.988793	0.874632	0.209335
chromosome	KZA74_00100	23,686..24,285	600	=>	yfcG, glutathione S-transferase family protein	GST, gst	ACX60_RS00100	ABUW_0020	A1S_3460	KZA74_00100	231.451	0.202526	0.239941	0.30849	0.973209	0.874715	0.338379
chromosome	KZA74_00340	72,571..73,119	549	<=	fosB, VOC family protein	fosB	ACX60_RS00335	ABUW_0068	A1S_3416	KZA74_00340	806.721	-0.499232	-0.542793	-1.96761	0.973209	0.874715	0.00531446
chromosome	KZA74_02085	439,853..440,581	729	=>	type 1 glutamine amidotransferase	NA	ACX60_RS02085	ABUW_0404	A1S_3082	KZA74_02085	235.012	0.250078	0.313694	-1.68129	0.973209	0.874715	2.45229e-05
chromosome	rpsI	513,705..514,091	387	<=	rpsI, 30S ribosomal protein S9	RP-S9, MRPS9, rpsI	ACX60_RS02520	ABUW_0493	A1S_3001	KZA74_02520	4219.88	0.405302	-0.568782	3.85759	0.973209	0.874715	4.39623e-08
chromosome	glnE	608,175..610,925	2751	=>	glnE, bifunctional [glutamate--ammonia ligase]-adenylyl-L-tyrosine phosphorylase/[glutamate--ammonia-ligase] adenylyltransferase	glnE	ACX60_RS02980	ABUW_0586	A1S_2905	KZA74_02985	2966.35	-0.445071	-0.329171	0.342245	0.973209	0.874715	0.450449
chromosome	mutM	689,838..690,662	825	<=	mutM, bifunctional DNA-formamidopyrimidine glycosylase/DNA-(apurinic or apyrimidinic site) lyase	mutM, fpg	ACX60_RS03345	ABUW_0659	A1S_2831	KZA74_03350	793.04	-0.180442	-0.22468	0.992357	0.973209	0.874715	0.000523618
chromosome	pal	965,492..966,055	564	<=	pal, peptidoglycan-associated lipoprotein Pal	pal	ACX60_RS04585	ABUW_0992	A1S_2595	KZA74_04610	1538.19	-0.317004	-0.409191	2.61667	0.973209	0.874715	2.97997e-07
chromosome	KZA74_05155	1,085,861..1,087,111	1251	<=	glycosyltransferase family 2 protein	NA	ACX60_RS05135	ABUW_1064	A1S_2485	KZA74_05155	640.591	0.145179	0.209258	-0.136253	0.973209	0.874715	0.649553
chromosome	KZA74_07405	1,588,647..1,589,510	864	=>	iron-containing redox enzyme family protein	NA	ACX60_RS07370	ABUW_1693	A1S_2041	KZA74_07405	1538.88	-0.7607	-0.501175	-0.578723	0.973209	0.874715	0.400521
chromosome	KZA74_09430	1,985,434..1,985,964	531	<=	flavin reductase family protein	NA	ACX60_RS09165	ABUW_2086	A1S_1744	KZA74_09430	143.739	-0.745736	-0.537669	-4.55472	0.973209	0.874715	4.41069e-11
chromosome	KZA74_09895	2,079,036..2,079,779	744	<=	adenosylcobinamide-GDP ribazoletransferase	E2.7.8.26, cobS, cobV	ACX60_RS09630	ABUW_2171	A1S_1663	KZA74_09895	194.133	0.349024	0.40725	-1.75658	0.973209	0.874715	0.00079606
chromosome	KZA74_11015	2,290,973..2,291,443	471	<=	KZA74_11015	NA	ACX60_RS10745	ABUW_2346	A1S_1478	KZA74_11015	156.436	-0.182369	-0.262563	-0.215423	0.973209	0.874715	0.552296
chromosome	KZA74_11695	2,437,527..2,438,024	498	<=	KZA74_11695	NA	ACX60_RS11410	NA	NA	KZA74_11695	145.285	-0.615516	-0.429209	-0.507507	0.973209	0.874715	0.386512
chromosome	KZA74_15200	3,187,880..3,188,671	792	<=	class I SAM-dependent methyltransferase	rsmJ	ACX60_RS14885	ABUW_3235	A1S_0700	KZA74_15200	283.462	-0.570796	-0.349182	-0.527628	0.973209	0.874715	0.26648
chromosome	KZA74_16200	3,403,372..3,403,650	279	<=	KZA74_16200	NA	ACX60_RS15875	ABUW_3433	A1S_0445	KZA74_16200	2980.1	-0.419377	-0.584945	0.000399786	0.973209	0.874715	0.999533
chromosome	KZA74_16535	3,473,013..3,473,624	612	<=	DUF1285 domain-containing protein	K09986	ACX60_RS16210	ABUW_3501	A1S_0379	KZA74_16535	442.559	-0.287779	-0.326219	-0.624903	0.973209	0.874715	0.151536
chromosome	KZA74_16690	3,513,809..3,515,311	1503	=>	AAA family ATPase	rep_2	ACX60_RS16365	ABUW_3532	A1S_0345	KZA74_16690	1186.55	-0.613723	-0.343588	1.1207	0.973209	0.874715	0.0120738
chromosome	KZA74_17585	3,701,182..3,702,336	1155	=>	LysM peptidoglycan-binding domain-containingprotein	tsaP, lysM	ACX60_RS17250	ABUW_3722	A1S_0167	KZA74_17585	482.63	0.352774	0.368222	-2.12152	0.973209	0.874715	5.13775e-06
chromosome	mtgA	2,868,746..2,869,423	678	<=	ppk1, polyphosphate kinase 1	ppk	ACX60_RS13425	ABUW_2907	A1S_0990	KZA74_13725	1645.06	-0.0936493	-0.192058	0.967711	0.97575	0.874715	6.0134e-05
chromosome	KZA74_16055	3,375,985..3,376,668	684	=>	Fe2+-dependent dioxygenase	K07336	ACX60_RS15730	ABUW_3404	A1S_0473	KZA74_16055	424.325	0.11111	0.230097	1.68535	0.97575	0.874715	3.02539e-09
chromosome	KZA74_02815	572,674..573,981	1308	<=	cation diffusion facilitator family transporter	NA	ACX60_RS02815	NA	A1S_2929	KZA74_02815	378.647	0.173647	0.378186	0.596407	0.97661	0.874715	0.245576
chromosome	pdxA	514,705..515,688	984	=>	pdxA, 4-hydroxythreonine-4-phosphate dehydrogenasePdxA	pdxA	ACX60_RS02530	ABUW_0495	A1S_2999	KZA74_02530	880.437	0.115294	-0.275825	0.886684	0.978617	0.874715	0.013564
chromosome	KZA74_15380	3,228,385..3,228,954	570	<=	YggT family protein	yggT	ACX60_RS15065	ABUW_3271	A1S_0611	KZA74_15380	466.202	0.118085	-0.287075	0.741826	0.978617	0.874715	0.0465144
pAB3	KZA74_18840	49,932..50,231	300	=>	H-NS histone family protein	NA	NA	NA	NA	KZA74_18840	895.636	-0.250697	-0.627187	0.734616	0.978617	0.874715	0.390821
chromosome	serB	104,650..105,873	1224	=>	serB, phosphoserine phosphatase SerB	serB, PSPH	ACX60_RS00480	ABUW_0097	A1S_3386	KZA74_00480	1253.37	0.0454524	-0.202783	-0.507609	0.988413	0.874715	0.0584314
chromosome	paaZ	2,449,835..2,451,937	2103	=>	paaZ, phenylacetic acid degradation bifunctionalprotein PaaZ	paaZ	ACX60_RS11480	ABUW_2536	A1S_1335	KZA74_11765	6615.59	-0.233395	-1.2414	-1.55199	0.9888	0.874715	0.357972
pAB3	KZA74_19005	91,472..91,663	192	<=	KZA74_19005	NA	NA	NA	A1S_3532	KZA74_19005	545.896	0.0628056	-0.358599	2.31415	0.9888	0.874715	1.6653e-07
chromosome	KZA74_01370	286,542..287,819	1278	<=	mgl, L-methionine gamma-lyase	metY, mgl	ACX60_RS01380	ABUW_0261	A1S_3222	KZA74_01370	592.295	0.0342112	0.409785	0.0254222	0.991879	0.874715	0.967261
chromosome	KZA74_14610	3,052,942..3,053,604	663	=>	elongation factor P hydroxylase	epmC	ACX60_RS14295	ABUW_3112	A1S_0814	KZA74_14610	1032.67	-0.0679518	-0.43574	-3.68687	0.991879	0.874715	1.1808e-11
chromosome	KZA74_13290	2,775,191..2,775,781	591	<=	KZA74_13290	NA	ACX60_RS13010	NA	A1S_3597	KZA74_13290	124.954	0.254774	0.239866	-1.56474	0.973209	0.87493	3.98121e-07
chromosome	KZA74_12910	2,682,017..2,682,301	285	=>	KZA74_12910	NA	ACX60_RS12630	NA	NA	KZA74_12910	49.7927	0.338319	0.484144	-4.02915	0.973209	0.87558	6.15786e-09
chromosome	hscB	2,116,811..2,117,329	519	=>	hscB, Fe-S protein assembly co-chaperone HscB	hscB, HSCB, HSC20	ACX60_RS09800	ABUW_2205	A1S_1629	KZA74_10065	551.321	0.124799	-0.460389	1.3247	0.988413	0.876852	0.0290373
chromosome	KZA74_03740	769,573..770,490	918	<=	patatin-like phospholipase family protein	K07001	ACX60_RS03730	ABUW_0823	A1S_2756	KZA74_03740	546.268	-0.48907	-0.232296	0.862684	0.973209	0.876947	0.00417778
chromosome	KZA74_14165	2,968,461..2,969,576	1116	=>	FAD-dependent oxidoreductase	thiO	ACX60_RS13855	ABUW_3023	A1S_0905	KZA74_14165	640.797	-0.438469	-0.260675	-0.350725	0.973209	0.876947	0.32739
chromosome	KZA74_06980	1,495,732..1,496,652	921	=>	LysR family transcriptional regulator	metR	ACX60_RS06950	ABUW_1599	A1S_2122	KZA74_06980	638.529	-0.139322	-0.272845	0.690032	0.97575	0.876947	0.0566143
chromosome	KZA74_15950	3,346,142..3,346,693	552	<=	phosphatase PAP2 family protein	bcrC	ACX60_RS15625	ABUW_3383	A1S_0496	KZA74_15950	494.954	0.202449	-0.362156	-0.28078	0.97575	0.876947	0.58711
chromosome	KZA74_15660	3,284,528..3,285,469	942	<=	RsiV family protein	rsiV	ACX60_RS15335	ABUW_3348	A1S_0556	KZA74_15660	647.191	0.0378071	-0.297761	0.42656	0.991879	0.876947	0.296508
chromosome	KZA74_12710	2,658,355..2,658,855	501	<=	zinc ribbon domain-containing protein	NA	ACX60_RS12425	NA	A1S_3619	KZA74_12710	742.404	-0.984208	-0.390832	0.423774	0.736269	0.877353	0.436833
chromosome	dnaA	1..1398	1398	=>	dnaA, chromosomal replication initiator protein DnaA	dnaA	ACX60_RS00005	ABUW_0001	A1S_0001	KZA74_00005	2192.61	-0.299156	-0.334049	1.57015	0.973209	0.877353	0.000282488
chromosome	KZA74_00335	71,493..72,272	780	<=	iclR, IclR family transcriptional regulator	iclR	ACX60_RS00330	ABUW_0067	A1S_3417	KZA74_00335	545.075	-0.165434	-0.144358	-0.0140216	0.973209	0.877353	0.947556
chromosome	KZA74_02710	549,849..549,995	147	=>	KZA74_02710	NA	NA	NA	A1S_3855	KZA74_02710	64.8082	0.408543	0.566097	-3.08183	0.973209	0.877353	4.56158e-05
chromosome	KZA74_03120	639,433..640,146	714	<=	glycerophosphodiester phosphodiesterase	E3.1.4.46, glpQ, ugpQ	ACX60_RS03115	ABUW_0613	A1S_2879	KZA74_03120	344.78	-0.285465	-0.188374	0.243413	0.973209	0.877353	0.348947
chromosome	KZA74_05550	1,180,589..1,181,512	924	=>	trypsin-like serine protease	NA	ACX60_RS05525	NA	A1S_2404	KZA74_05550	372.842	0.283481	0.361498	-2.13179	0.973209	0.877353	5.14163e-06
chromosome	KZA74_08355	1,758,804..1,759,166	363	=>	YnfA family protein	TC.SMR3	ACX60_RS08295	ABUW_1815	A1S_1909	KZA74_08355	248.134	-0.359698	-0.286465	-0.117374	0.973209	0.877353	0.77657
chromosome	KZA74_08670	1,825,548..1,826,462	915	=>	LysR family transcriptional regulator	catM	ACX60_RS08610	ABUW_1878	A1S_1842	KZA74_08670	383.584	-0.26766	-0.16557	-0.110066	0.973209	0.877353	0.645134
chromosome	KZA74_09465	1,993,200..1,994,621	1422	<=	GntP family permease	NA	ACX60_RS09200	ABUW_2093	A1S_1736	KZA74_09465	1152.36	-0.401314	-0.430546	-2.05552	0.973209	0.877353	0.000215299
chromosome	glnD	2,294,494..2,297,157	2664	=>	glnD, [protein-PII] uridylyltransferase	glnD	ACX60_RS10770	ABUW_2351	A1S_1474	KZA74_11040	1686.84	-0.360401	-0.196624	0.891185	0.973209	0.877353	0.000517327
chromosome	KZA74_11950	2,493,542..2,494,045	504	<=	hcp, type VI secretion system tube protein Hcp	hcp	ACX60_RS11665	ABUW_2578	A1S_1296	KZA74_11950	788.064	-0.339554	-0.491096	1.01154	0.973209	0.877353	0.132754
chromosome	KZA74_14020	2,933,775..2,934,290	516	<=	acyl-CoA thioesterase	NA	ACX60_RS13715	ABUW_2966	A1S_0933	KZA74_14020	473.388	-0.357767	-0.246176	1.00144	0.973209	0.877353	0.00165257
chromosome	KZA74_14705	3,074,919..3,075,671	753	=>	biotin--[acetyl-CoA-carboxylase] ligase	birA	ACX60_RS14390	ABUW_3132	A1S_0794	KZA74_14705	389.714	-0.401561	-0.1881	0.360572	0.973209	0.877353	0.15761
chromosome	tsaB	3,188,683..3,189,348	666	<=	tsaB, tRNA(adenosine(37)-N6)-threonylcarbamoyltransferase complex dimerization subunit type 1 TsaB	tsaB	ACX60_RS14890	ABUW_3236	A1S_0699	KZA74_15205	393.793	-0.371554	-0.254434	0.209105	0.973209	0.877353	0.564889
chromosome	KZA74_15595	3,270,790..3,272,244	1455	<=	NAD(P)(+) transhydrogenase (Re/Si-specific)subunit beta	pntB	ACX60_RS15275	ABUW_3312	A1S_0568	KZA74_15595	1048.88	-0.492559	-0.320592	-0.651141	0.973209	0.877353	0.136701
pAB3	KZA74_18850	50,705..52,429	1725	<=	KZA74_18850	NA	NA	NA	A1S_3516	KZA74_18850	2830.32	0.626794	-0.665743	1.90754	0.973209	0.877353	0.0328603
chromosome	ccsA	3,078,021..3,078,830	810	=>	ccsA, cytochrome c biogenesis protein CcsA	ccsA	ACX60_RS14405	ABUW_3135	A1S_0790	KZA74_14720	402.928	0.166623	0.251362	1.84544	0.974056	0.877353	4.73819e-09
chromosome	KZA74_12030	2,513,723..2,514,259	537	=>	NAD(P)H-dependent oxidoreductase	kefF	ACX60_RS11745	ABUW_2590	A1S_1279	KZA74_12030	122.746	0.298303	0.561532	-1.79153	0.97575	0.877353	0.0166963
chromosome	secE	3,586,223..3,586,663	441	<=	secE, preprotein translocase subunit SecE	secE	ACX60_RS16685	ABUW_3596	A1S_0281	KZA74_17015	2239.57	0.259505	-0.460675	1.92959	0.97575	0.877353	0.00133256
chromosome	KZA74_05510	1,170,073..1,173,358	3286	=>	type I secretion protein	NA	ACX60_RS05485	NA	A1S_2413	KZA74_05510	1081.44	0.16049	0.394988	-3.23545	0.978617	0.877353	1.64973e-10
chromosome	KZA74_00220	51,962..52,084	123	<=	KZA74_00220	NA	NA	NA	NA	KZA74_00220	21.5772	0.0995523	0.454269	-6.28185	0.988793	0.877353	2.91479e-07
chromosome	KZA74_05185	1,092,478..1,093,797	1320	<=	D-alanyl-D-alanine carboxypeptidase PBP6B	dacC, dacA, dacD	ACX60_RS05165	ABUW_1070	A1S_2479	KZA74_05185	753.997	-0.0392452	-0.204027	0.925624	0.9888	0.877353	0.000465874
chromosome	dapA	64,976..65,869	894	<=	dapA, 4-hydroxy-tetrahydrodipicolinate synthase	dapA	ACX60_RS00300	ABUW_0061	A1S_3423	KZA74_00305	4230.85	0.0433806	-0.478797	1.99636	0.991879	0.877353	0.00146723
chromosome	KZA74_03145	645,019..645,531	513	=>	DUF1543 domain-containing protein	NA	ACX60_RS03140	ABUW_0618	A1S_2874	KZA74_03145	300.046	-0.0295685	-0.213451	-0.386747	0.991879	0.877353	0.185104
chromosome	KZA74_04035	833,868..834,791	924	=>	DUF808 domain-containing protein	K09781	ACX60_RS04015	ABUW_0882	A1S_2721	KZA74_04035	1053.63	0.0341595	-0.365556	0.721098	0.991879	0.877353	0.151067
chromosome	KZA74_00590	129,869..132,307	2439	=>	peptidase M23	M23	ACX60_RS00605	NA	A1S_3902	KZA74_00590	655.696	0.0170269	0.242788	-0.604562	0.992114	0.877353	0.0654428
chromosome	KZA74_14835	3,104,739..3,104,966	228	<=	KZA74_14835	NA	ACX60_RS14520	ABUW_3158	A1S_3564	KZA74_14835	2411.63	0.00134193	-0.690612	-0.857961	0.999942	0.877353	0.375074
chromosome	KZA74_02635	536,018..536,914	897	=>	alpha/beta hydrolase	a/b hydrolase	ACX60_RS02635	ABUW_0516	A1S_2950	KZA74_02635	352.026	0.303171	0.293932	0.280016	0.973209	0.877869	0.502623
chromosome	tusA	3,476,134..3,476,391	258	<=	tusA, sulfurtransferase TusA	tusA, sirA	ACX60_RS16225	ABUW_3504	A1S_0376	KZA74_16550	206.794	-0.587643	-0.26355	0.516495	0.973209	0.877869	0.149389
pAB3	KZA74_18985	87,980..88,849	870	=>	parB, ParB/RepB/Spo0J family partition protein	NA	NA	NA	A1S_3529	KZA74_18985	1373.2	0.180647	-0.569531	1.05222	0.986689	0.877869	0.18161
chromosome	KZA74_02705	549,482..549,745	264	=>	KZA74_02705	NA	ACX60_RS02710	ABUW_3335	NA	KZA74_02705	126.317	0.557459	0.449432	-2.60543	0.973209	0.880067	1.27764e-05
chromosome	KZA74_12215	2,556,072..2,556,740	669	=>	O-methyltransferase	NA	ACX60_RS11925	ABUW_2638	A1S_1247	KZA74_12215	273.69	-0.252061	-0.20949	0.0929428	0.973209	0.880067	0.761834
chromosome	KZA74_03215	660,473..661,114	642	<=	hemolysin III family protein	hlyIII	ACX60_RS03210	ABUW_0632	A1S_2859	KZA74_03215	390.006	-0.432993	0.234825	0.964697	0.973209	0.880201	0.00181419
chromosome	KZA74_15010	3,149,254..3,149,745	492	<=	flavin reductase	rutF	ACX60_RS14695	ABUW_3196	A1S_0738	KZA74_15010	1339.43	-0.505741	-0.411258	1.55968	0.973209	0.880201	0.00442967
chromosome	rimI	3,003,042..3,003,497	456	<=	rimI, ribosomal protein S18-alanineN-acetyltransferase	rimI	ACX60_RS14020	ABUW_3057	A1S_0872	KZA74_14330	110.353	-0.134483	0.278572	0.401341	0.977542	0.880201	0.298213
chromosome	KZA74_03130	640,894..642,768	1875	<=	TonB-dependent receptor	btuB	ACX60_RS03125	ABUW_0615	A1S_2877	KZA74_03130	1624.26	-0.488613	-0.414474	1.17641	0.973209	0.880497	0.036227
chromosome	KZA74_06985	1,496,703..1,497,155	453	<=	DUF441 domain-containing protein	NA	ACX60_RS06955	ABUW_1600	A1S_2121	KZA74_06985	180.026	-0.0562143	0.188852	0.38617	0.988064	0.880497	0.131513
chromosome	fdhD	915,093..915,884	792	=>	fdhD,formate dehydrogenase accessory sulfurtransferase FdhD	fdhD	ACX60_RS04360	ABUW_0945	A1S_2639	KZA74_04380	584.907	-0.239537	-0.203257	-1.05858	0.973209	0.881038	7.06096e-05
chromosome	KZA74_04855	1,028,095..1,028,664	570	<=	CAP domain-containing protein	NA	ACX60_RS04840	ABUW_1008	A1S_2546	KZA74_04855	185.948	0.357895	0.272834	0.213891	0.973209	0.881038	0.589645
chromosome	KZA74_02350	479,116..479,691	576	<=	xanthine phosphoribosyltransferase	xpt	ACX60_RS02350	ABUW_0458	A1S_3035	KZA74_02350	552.627	-0.188463	-0.240993	2.49751	0.973209	0.881802	2.63216e-16
pAB3	KZA74_19170	123,147..123,413	267	<=	KZA74_19170	NA	NA	NA	A1S_3551	KZA74_19170	59.6939	0.341669	0.283184	0.661025	0.973209	0.881802	0.0790015
chromosome	KZA74_03850	796,354..796,980	627	<=	phosphatase PAP2 family protein	pgpB	ACX60_RS03840	ABUW_0845	A1S_2734	KZA74_03850	726.346	-0.0882396	-0.316492	1.90939	0.988413	0.881802	3.20806e-06
chromosome	KZA74_02295	468,936..469,012	77	=>	tRNA-Arg	trnR	NA	NA	A1S_3015	KZA74_02295	443.157	0.144069	-0.442666	-0.98552	0.986689	0.882235	0.107887
chromosome	KZA74_16395	3,445,183..3,445,860	678	=>	DUF1345 domain-containing protein	NA	ACX60_RS16070	ABUW_3472	A1S_0409	KZA74_16395	355.045	1.16346	0.35064	0.0277528	0.288491	0.883051	0.959912
chromosome	KZA74_00355	75,422..76,810	1389	=>	aroP, amino acid permease	aroP	ACX60_RS00350	ABUW_0071	A1S_3413	KZA74_00355	1936.67	-0.699766	-0.554129	-2.64142	0.973209	0.883051	0.000360218
chromosome	KZA74_00410	89,361..91,187	1827	=>	DUF885 domain-containing protein	NA	ACX60_RS00405	ABUW_0082	A1S_3400	KZA74_00410	554.108	0.426859	0.415842	-0.526654	0.973209	0.883051	0.375012
chromosome	KZA74_01400	293,256..294,473	1218	=>	czcB,	czcB	ACX60_RS01410	ABUW_0267	A1S_3218	KZA74_01400	436.824	-0.603516	-0.324353	-2.93732	0.973209	0.883051	9.24079e-12
chromosome	KZA74_02330	475,100..475,894	795	<=	helix-turn-helix transcriptional regulator	hthR	ACX60_RS02330	ABUW_0454	A1S_3039	KZA74_02330	201.457	0.337216	0.408236	-1.4229	0.973209	0.883051	0.0114697
chromosome	KZA74_02515	512,881..513,534	654	<=	glutathione S-transferase N-terminaldomain-containing protein	sspA, mglA	ACX60_RS02515	ABUW_0492	A1S_3002	KZA74_02515	201.072	0.259004	0.36733	0.440849	0.973209	0.883051	0.401626
chromosome	KZA74_02870	584,019..584,321	303	<=	KZA74_02870	K09780	ACX60_RS02865	ABUW_0524	A1S_2922	KZA74_02870	329.877	-0.233537	-0.296327	0.597498	0.973209	0.883051	0.153227
chromosome	KZA74_03750	771,312..772,559	1248	=>	MFS transporter	NA	ACX60_RS03740	ABUW_0825	A1S_2754	KZA74_03750	402.373	0.282251	0.358866	-1.86949	0.973209	0.883051	8.67633e-05
chromosome	lolA	801,489..802,184	696	=>	lolA, outer membrane lipoprotein chaperone LolA	lolA	ACX60_RS03870	ABUW_0850	A1S_2729	KZA74_03880	511.142	0.210999	0.223513	1.78086	0.973209	0.883051	1.23202e-09
chromosome	KZA74_03960	816,740..817,672	933	<=	rhodanese-related sulfurtransferase	K07146	ACX60_RS03950	ABUW_0865	A1S_2708	KZA74_03960	883.012	0.335562	-0.254968	1.28999	0.973209	0.883051	0.000168191
chromosome	KZA74_04080	852,534..853,166	633	<=	CatB-related O-acetyltransferase	NA	ACX60_RS04060	ABUW_0891	A1S_2691	KZA74_04080	271.625	0.361517	0.477433	-0.735157	0.973209	0.883051	0.289124
chromosome	KZA74_04730	1,000,203..1,000,829	627	=>	acetyltransferase	NA	ACX60_RS04705	NA	A1S_2570	KZA74_04730	199.674	0.169041	0.239337	-0.590465	0.973209	0.883051	0.0792649
chromosome	KZA74_04920	1,038,415..1,039,422	1008	<=	sulfate ABC transporter substrate-bindingprotein	cysP, sbp	ACX60_RS04905	ABUW_1021	A1S_2531	KZA74_04920	527.892	-0.235132	-0.248519	0.707674	0.973209	0.883051	0.0358214
chromosome	xdhB	1,231,885..1,234,260	2376	=>	xdhB, xanthine dehydrogenase molybdopterin bindingsubunit	xdhB	ACX60_RS05725	ABUW_1197	A1S_2363	KZA74_05755	1158.64	-0.347851	-0.215117	-1.98095	0.973209	0.883051	2.46706e-12
chromosome	KZA74_05950	1,281,664..1,282,149	486	=>	DUF3465 domain-containing protein	NA	ACX60_RS05925	ABUW_1237	A1S_2321	KZA74_05950	155.217	0.453365	0.321619	-0.504828	0.973209	0.883051	0.276396
chromosome	KZA74_06380	1,366,486..1,367,994	1509	=>	DUF3336 domain-containing protein	NA	ACX60_RS06350	ABUW_1456	A1S_2241	KZA74_06380	695.518	-0.274187	-0.135822	-0.0846072	0.973209	0.883051	0.675206
chromosome	KZA74_06625	1,411,614..1,412,180	567	=>	TetR/AcrR family transcriptional regulator	NA	ACX60_RS06595	ABUW_1524	A1S_2197	KZA74_06625	124.107	0.489437	0.333753	-1.46722	0.973209	0.883051	0.0015095
chromosome	KZA74_06855	1,460,827..1,461,963	1137	=>	acyl-CoA dehydrogenase family protein	NA	ACX60_RS06825	ABUW_1573	A1S_2149	KZA74_06855	1150.13	0.371646	-0.515699	-3.68727	0.973209	0.883051	4.1429e-08
chromosome	KZA74_07355	1,576,840..1,577,274	435	<=	acyl-CoA thioesterase	ybgC	ACX60_RS07320	ABUW_1683	A1S_2054	KZA74_07355	165.262	-0.361668	-0.278023	0.0168946	0.973209	0.883051	0.968688
chromosome	KZA74_07485	1,599,183..1,599,458	276	=>	KZA74_07485	NA	NA	NA	NA	KZA74_07485	46.2788	0.609266	0.365236	-4.02735	0.973209	0.883051	9.24079e-12
chromosome	KZA74_07770	1,641,979..1,642,482	504	=>	KZA74_07770	NA	ACX60_RS07725	ABUW_1695	A1S_2012	KZA74_07770	613.866	-0.479812	-0.414913	0.740705	0.973209	0.883051	0.211106
chromosome	KZA74_09270	1,949,720..1,950,454	735	=>	yadV, fimbria/pilus periplasmic chaperone	yadV	NA	NA	NA	KZA74_09270	567.879	-0.421229	-0.369108	1.63847	0.973209	0.883051	0.00105265
chromosome	antB	1,981,337..1,981,828	492	=>	antB, anthranilate 1,2-dioxygenase small subunit	antB	NA	NA	NA	KZA74_09410	87.5646	-0.954256	-0.521216	-3.42797	0.973209	0.883051	1.37512e-06
chromosome	antC	1,981,834..1,982,868	1035	=>	antC, anthranilate 1,2-dioxygenase electron transfercomponent AntC	antC	NA	NA	NA	KZA74_09415	306.667	-0.573959	-0.372877	-2.30631	0.973209	0.883051	4.02852e-06
chromosome	KZA74_10440	2,183,574..2,183,837	264	=>	KZA74_10440	NA	ACX60_RS10175	NA	A1S_3685	KZA74_10440	62.4962	0.580134	0.390342	-2.59279	0.973209	0.883051	1.42003e-06
chromosome	KZA74_11050	2,298,413..2,299,045	633	<=	LysE family translocator	NA	ACX60_RS10780	ABUW_2353	A1S_1472	KZA74_11050	143.363	0.513735	0.387838	-2.91116	0.973209	0.883051	3.4768e-08
chromosome	KZA74_12680	2,650,648..2,651,070	423	<=	C40 family peptidase	NA	ACX60_RS12395	NA	NA	KZA74_12680	114.638	-0.380202	-0.336698	-2.91552	0.973209	0.883051	1.91742e-10
chromosome	KZA74_12830	2,673,067..2,673,282	216	<=	KZA74_12830	NA	ACX60_RS12550	NA	A1S_3613	KZA74_12830	43.2123	0.450745	0.623609	-5.7945	0.973209	0.883051	7.89172e-08
chromosome	ureE	2,841,064..2,841,546	483	<=	ureE, urease accessory protein UreE	ureE	ACX60_RS13300	ABUW_2881	A1S_1015	KZA74_13590	328.54	-0.42796	-0.334211	-0.678557	0.973209	0.883051	0.153413
chromosome	KZA74_13795	2,883,956..2,884,120	165	=>	YgdI/YgdR family lipoprotein		ACX60_RS13495	ABUW_2922	NA	KZA74_13795	335.071	-0.341444	-0.384673	0.910575	0.973209	0.883051	0.0926009
chromosome	KZA74_14680	ND	ND	ND	ligA, NAD-dependent DNA ligase LigA	E6.5.1.2, ligA, ligB	ACX60_RS14365	ABUW_3127	A1S_0799	KZA74_14680	1105.56	-0.221723	-0.233204	-0.663672	0.973209	0.883051	0.0412699
chromosome	KZA74_14815	3,100,325..3,101,206	882	=>	pyridoxal-phosphate dependent enzyme	dcyD	ACX60_RS14500	ABUW_3154	A1S_0773	KZA74_14815	278.309	0.428352	0.455914	-0.804231	0.973209	0.883051	0.212406
chromosome	pheT	3,236,810..3,239,191	2382	<=	pheT, phenylalanine--tRNA ligase subunit beta	FARSB, pheT	ACX60_RS15110	ABUW_3280	A1S_0602	KZA74_15430	3610.93	-0.3632	-0.438654	-0.277242	0.973209	0.883051	0.676526
chromosome	hemW	3,457,321..3,458,475	1155	<=	hemW, radical SAM family heme chaperone HemW	hemW, hemN, yggW	ACX60_RS16125	ABUW_3484	A1S_0397	KZA74_16450	1341.01	-0.651429	-0.321385	0.177619	0.973209	0.883051	0.717376
chromosome	KZA74_16510	3,469,024..3,469,218	195	=>	DNA gyrase inhibitor YacG	K09862	ACX60_RS16185	ABUW_3496	NA	KZA74_16510	168.915	-0.542291	-0.268689	0.947889	0.973209	0.883051	0.00921788
chromosome	gspD	3,591,749..3,594,025	2277	<=	gspD, type II secretion system secretin GspD	gspD	ACX60_RS16735	ABUW_3606	A1S_0271	KZA74_17065	1939.11	-0.352887	-0.291117	0.521625	0.973209	0.883051	0.205499
chromosome	KZA74_18100	3,813,085..3,814,347	1263	<=	nucleotide sugar dehydrogenase	ugd	ACX60_RS17750	ABUW_3818	A1S_3484	KZA74_18100	1796.64	-0.33241	-0.405705	1.09053	0.973209	0.883051	0.0507377
chromosome	mnmE	3,897,350..3,898,705	1356	<=	mnmE, tRNA uridine-5-carboxymethylaminomethyl(34)synthesis GTPase MnmE	trmE,mnmE, MSS1	ACX60_RS18170	ABUW_3902	A1S_2979	KZA74_18520	802.894	-0.214825	-0.285277	0.0891351	0.973209	0.883051	0.839322
pAB3	KZA74_18980	86,669..86,671	3	==	Abi family protein	NA	NA	NA	A1S_0638	KZA74_18980	585.704	0.287935	0.242854	1.76763	0.973209	0.883051	1.92593e-08
pAB3	KZA74_19070	104,431..104,757	327	=>	KZA74_19070	NA	NA	NA	A1S_3538	KZA74_19070	128.928	0.657587	-0.436738	0.805734	0.973209	0.883051	0.186894
chromosome	KZA74_11455	2,382,641..2,383,252	612	=>	LysE family translocator	NA	ACX60_RS11170	ABUW_2430	A1S_1390	KZA74_11455	295.251	0.379143	0.554467	0.114509	0.973927	0.883051	0.895102
chromosome	ubiA	1,250,797..1,251,675	879	=>	ubiA, 4-hydroxybenzoate octaprenyltransferase	ubiA	ACX60_RS05785	ABUW_1209	A1S_2349	KZA74_05815	439.975	-0.111134	-0.166237	0.141648	0.97575	0.883051	0.557425
chromosome	KZA74_06860	1,462,184..1,463,827	1644	=>	AMP-binding protein	ACSS, acs	ACX60_RS06830	ABUW_1574	A1S_2148	KZA74_06860	910.322	-0.221382	-0.428805	-3.75392	0.97575	0.883051	3.28344e-11
chromosome	KZA74_10170	2,140,290..2,142,080	1791	<=	ABC transporter substrate-binding protein	hbpA	ACX60_RS09905	ABUW_2226	A1S_1608	KZA74_10170	512.267	0.171771	0.277292	0.4678	0.97575	0.883051	0.231166
chromosome	lpxL	3,416,413..3,417,348	936	=>	lpxL, LpxL/LpxP family Kdo(2)-lipid IV(A)lauroyl/palmitoleoyl acyltransferase	lpxL, htrB	ACX60_RS15945	ABUW_3447	A1S_0431	KZA74_16270	571.689	0.195093	0.302412	0.332025	0.97575	0.883051	0.452997
chromosome	KZA74_17745	3,729,994..3,730,521	528	<=	PadR family transcriptional regulator	padR	ACX60_RS17410	ABUW_3753	A1S_0132	KZA74_17745	159.559	0.139379	0.274321	-0.726819	0.97575	0.883051	0.0599158
chromosome	KZA74_09875	2,074,878..2,076,434	1557	=>	PepSY domain-containing protein	NA	ACX60_RS09610	ABUW_2167	A1S_1666	KZA74_09875	367.089	0.208139	0.445052	-0.232811	0.978617	0.883051	0.731131
chromosome	KZA74_09940	2,088,034..2,089,557	1524	<=	PepSY domain-containing protein	bfnL	ACX60_RS09675	ABUW_2180	A1S_1656	KZA74_09940	428.592	0.164469	0.35151	0.212352	0.978617	0.883051	0.689398
chromosome	KZA74_01410	297,754..298,710	957	=>	czcD,	czcD, zitB	ACX60_RS01420	ABUW_0269	A1S_3214	KZA74_01410	571.692	-0.0613135	-0.243981	-0.347152	0.988413	0.883051	0.31969
chromosome	KZA74_11735	2,445,156..2,445,929	774	<=	enoyl-CoA hydratase/isomerase family protein	paaF, echA	ACX60_RS11450	ABUW_2530	A1S_1341	KZA74_11735	1885.38	-0.284815	-1.22942	-2.25351	0.988413	0.883051	0.200585
chromosome	KZA74_18250	3,844,186..3,844,803	618	<=	thiol:disulfide interchange protein DsbA/DsbL	dsbA	ACX60_RS17895	ABUW_3846	A1S_0037	KZA74_18250	1852.23	-0.14724	-0.6128	-0.480087	0.988413	0.883051	0.602426
chromosome	KZA74_07395	1,585,802..1,587,139	1338	<=	PepSY domain-containing protein	NA	ACX60_RS07360	ABUW_1691	A1S_2043	KZA74_07395	357.61	0.0563554	0.447384	-1.54563	0.991879	0.883051	0.0127056
chromosome	KZA74_17595	3,703,538..3,704,107	570	=>	threonylcarbamoyl-AMP synthase	tsaC, rimN, SUA5	ACX60_RS17260	ABUW_3724	A1S_0165	KZA74_17595	331.049	0.0187977	-0.220482	-0.102921	0.991879	0.883051	0.756916
chromosome	KZA74_09020	1,899,051..1,899,389	339	=>	KZA74_09020	NA	ACX60_RS08965	NA	NA	KZA74_09020	76.4891	-0.0165849	0.318828	-0.915092	0.995742	0.883051	0.0418278
chromosome	KZA74_08205	1,728,904..1,729,335	432	<=	CBS domain-containing protein	NA	ACX60_RS08145	ABUW_1783	A1S_1935	KZA74_08205	928.771	0.0121761	-0.501196	1.44947	0.999942	0.883051	0.0377125
chromosome	KZA74_01060	236,576..237,001	426	=>	GFA fam, aldehyde-activating protein	GFA	ACX60_RS01080	ABUW_0210	A1S_3274	KZA74_01060	210.607	0.176851	-0.196269	0.389162	0.973209	0.883354	0.15761
chromosome	KZA74_00325	69,379..69,849	471	<=	DUF523 domain-containing protein	NA	ACX60_RS00320	ABUW_0065	A1S_3419	KZA74_00325	142.59	0.270091	0.338315	-1.02304	0.973209	0.883962	0.0318682
chromosome	KZA74_06320	1,353,844..1,354,848	1005	=>	quinone-dependent dihydroorotate dehydrogenase	DHODH, pyrD	ACX60_RS06290	ABUW_1444	A1S_2253	KZA74_06320	1095.28	0.303718	-0.292044	1.39005	0.973209	0.883962	0.000480024
chromosome	KZA74_09015	1,898,303..1,898,764	462	<=	KZA74_09015	NA	ACX60_RS08960	NA	NA	KZA74_09015	101.981	-0.231648	0.311515	0.512912	0.973209	0.883962	0.251787
chromosome	KZA74_08420	1,772,484..1,773,161	678	<=	DUF421 domain-containing protein	NA	ACX60_RS08360	ABUW_1828	A1S_1897	KZA74_08420	135.865	-0.100088	0.275381	-1.04776	0.984383	0.883962	0.00629952
chromosome	KZA74_11150	2,320,903..2,322,777	1875	<=	amidohydrolase	NA	ACX60_RS10880	ABUW_2373	A1S_1451	KZA74_11150	885.583	-0.172398	-0.208736	-1.79679	0.973209	0.88405	1.24669e-10
chromosome	dusA	3,276,701..3,277,705	1005	=>	dusA, tRNA dihydrouridine(20/20a) synthase DusA	dusA	ACX60_RS15305	ABUW_3342	A1S_0562	KZA74_15625	573.124	-0.596727	-0.295154	0.244159	0.973209	0.88405	0.584482
chromosome	KZA74_10400	2,177,935..2,178,213	279	<=	KZA74_10400	NA	ACX60_RS10135	NA	A1S_1585	KZA74_10400	63.0015	0.295645	0.515518	-6.17799	0.97575	0.885255	4.99396e-11
chromosome	KZA74_14155	2,966,782..2,967,279	498	<=	thioesterase family protein	NA	ACX60_RS13845	ABUW_3021	A1S_0907	KZA74_14155	855.371	0.123786	-0.304163	0.692761	0.979505	0.885255	0.111441
chromosome	bfr	338,401..338,865	465	<=	bfr, bacterioferritin	bfr	ACX60_RS01605	ABUW_0306	A1S_3175	KZA74_01595	4564.24	0.201092	-0.642095	0.899537	0.986689	0.885744	0.340487
chromosome	KZA74_10410	2,179,542..2,180,426	885	<=	YdaU family protein	NA	ACX60_RS10145	NA	A1S_1583	KZA74_10410	199.625	-0.0447822	0.467838	-5.66253	0.991879	0.885744	2.09507e-16
chromosome	amvA	1,570,467..1,571,945	1479	=>	amvA, multidrug efflux MFS transporter AmvA	amvA, smvA, qacA, lfrA	ACX60_RS07305	ABUW_1679	A1S_2057	KZA74_07340	2756.74	-0.665639	-0.447613	0.209212	0.973209	0.886189	0.763144
chromosome	KZA74_04595	963,262..964,038	777	<=	RNA methyltransferase	spoU	ACX60_RS04570	ABUW_0989	A1S_2597	KZA74_04595	436.396	0.0175374	0.244072	1.82091	0.992114	0.886189	2.08671e-08
pAB3	KZA74_18880	63,940..64,512	573	=>	KZA74_18880	NA	NA	NA	A1S_3522	KZA74_18880	664.563	0.380883	-0.392296	1.52126	0.973209	0.886847	0.00529473
chromosome	KZA74_17035	3,588,316..3,588,391	76	<=	tRNA-Gly	trnG	NA	NA	A1S_0277	KZA74_17035	2466.42	4.23637	0.658254	-1.22526	0.000110851	0.887947	0.204197
chromosome	KZA74_05590	1,189,410..1,189,925	516	=>	KZA74_05590	NA	ACX60_RS05560	ABUW_1161	NA	KZA74_05590	54.6105	0.424896	0.312877	-1.42747	0.973209	0.887947	0.00134606
chromosome	KZA74_04360	909,586..910,368	783	<=	SDR family oxidoreductase	K07124	ACX60_RS04340	ABUW_0941	A1S_2643	KZA74_04360	220.87	0.215771	0.332782	-1.13155	0.97575	0.887947	0.0160668
chromosome	ahpC	2,606,822..2,607,385	564	=>	ahpC, peroxiredoxin	PRDX2_4, ahpC	ACX60_RS12195	ABUW_2719	A1S_1205	KZA74_12475	9906.37	-0.319267	-0.67696	3.17498	0.978617	0.887947	0.000720956
chromosome	KZA74_16570	3,479,456..3,479,800	345	<=	KZA74_16570	NA	ACX60_RS16245	ABUW_3508	A1S_0371	KZA74_16570	1592.24	-0.133347	-0.576439	-0.0180038	0.988591	0.887947	0.984136
chromosome	KZA74_03090	632,998..633,378	381	<=	KZA74_03090	NA	ACX60_RS03085	ABUW_0607	A1S_2885	KZA74_03090	282.957	-0.00274332	0.447826	0.750769	0.999942	0.887947	0.253128
chromosome	KZA74_12745	2,661,467..2,661,850	384	<=	DUF4054 domain-containing protein	NA	ACX60_RS12460	NA	A1S_1159	KZA74_12745	104.807	-0.573508	-0.358516	-4.12779	0.973209	0.890022	1.99475e-15
chromosome	KZA74_14810	3,099,133..3,100,260	1128	=>	HlyD family secretion protein	hlyD	ACX60_RS14495	ABUW_3153	A1S_0774	KZA74_14810	524.979	-0.384534	-0.164056	-0.799984	0.973209	0.890022	0.00043052
chromosome	upp	3,108,499..3,109,134	636	<=	upp, uracil phosphoribosyltransferase	upp, UPRT	ACX60_RS14550	ABUW_3164	A1S_0765	KZA74_14865	1361.61	-0.491907	-0.349392	0.641692	0.973209	0.890022	0.211793
chromosome	KZA74_09505	2,000,328..2,000,969	642	=>	3-oxoacid CoA-transferase subunit B	E2.8.3.5B, scoB	ACX60_RS09240	ABUW_2097	A1S_1731	KZA74_09505	1383.47	-0.293626	-0.629552	-2.2842	0.978617	0.890022	0.0102432
chromosome	KZA74_01915	402,985..404,085	1101	=>	HPP family membrane protein	HPP, K07168	ACX60_RS01920	ABUW_0371	A1S_3114	KZA74_01915	401.064	0.137468	0.282561	-1.69913	0.977802	0.890187	1.32976e-05
chromosome	trxA	3,233,764..3,234,090	327	=>	trxA, thioredoxin	trxA	ACX60_RS15090	ABUW_3276	A1S_0606	KZA74_15405	1310.41	-0.482265	-0.458181	1.60977	0.973209	0.890667	0.0130887
chromosome	KZA74_04675	981,963..982,568	606	<=	NTPase KAP	NA	ACX60_RS04650	NA	A1S_2583	KZA74_04675	145.612	-0.25332	0.248007	-0.437526	0.973209	0.891261	0.231579
chromosome	KZA74_10830	2,255,405..2,255,617	213	<=	KZA74_10830	NA	ACX60_RS10560	ABUW_2308	A1S_3677	KZA74_10830	87.4887	2.04674	0.394404	1.55126	0.00627049	0.891328	0.00439791
chromosome	astA	382,351..383,382	1032	=>	astA, arginine N-succinyltransferase	astA	ACX60_RS01825	ABUW_0352	A1S_3131	KZA74_01820	668.472	0.0424471	-0.330874	-0.336729	0.991879	0.891328	0.50201
chromosome	KZA74_14965	3,132,691..3,133,974	1284	=>	nrdF, ribonucleotide-diphosphate reductase subunitbeta	E1.17.4.1B, nrdB, nrdF	ACX60_RS14650	ABUW_3185	A1S_0746	KZA74_14965	5886.36	1.18877	-0.571479	2.38041	0.973209	0.891378	0.00318955
chromosome	paaG	2,444,365..2,445,156	792	<=	paaG, 2-(1,2-epoxy-1,2-dihydrophenyl)acetyl-CoAisomerase PaaG	paaG	ACX60_RS11445	ABUW_2529	A1S_1342	KZA74_11730	2519.27	-0.539004	-1.18731	-2.43114	0.978617	0.891378	0.164384
chromosome	KZA74_05160	1,087,098..1,087,994	897	<=	KZA74_05160	NA	ACX60_RS05140	ABUW_1065	A1S_2484	KZA74_05160	271.869	0.0732941	0.240575	-0.0011641	0.988064	0.891378	0.997497
chromosome	KZA74_13525	2,829,152..2,830,261	1110	=>	META and DUF4377 domain-containing protein	NA	ACX60_RS13240	ABUW_2868	A1S_1027	KZA74_13525	1809.58	0.0518582	-0.455722	2.27945	0.991879	0.891378	0.000335508
chromosome	argH	3,602,718..3,604,151	1434	=>	argH, argininosuccinate lyase	argH, ASL	ACX60_RS16790	ABUW_3617	A1S_0259	KZA74_17120	1409.25	-0.421974	-0.269457	1.70932	0.973209	0.891961	3.89981e-06
chromosome	KZA74_01750	365,772..366,137	366	=>	KZA74_01750	NA	ACX60_RS01755	ABUW_0336	A1S_3147	KZA74_01750	124.323	-0.203616	0.329372	0.368013	0.97575	0.891961	0.456922
chromosome	feaR	1,809,844..1,810,758	915	=>	feaR, transcriptional regulator FeaR	feaR	ACX60_RS08550	ABUW_1866	A1S_1855	KZA74_08610	170.966	-0.200189	0.285011	-1.69093	0.97575	0.89272	2.30972e-05
chromosome	mltB	1,286,159..1,287,160	1002	<=	mltB, lytic murein transglycosylase B	mltB	ACX60_RS05955	ABUW_1243	A1S_2316	KZA74_05980	428.531	-0.190146	-0.245308	0.957597	0.973209	0.89281	0.00558019
chromosome	KZA74_18475	3,889,716..3,890,081	366	=>	KZA74_18475	NA	ACX60_RS18120	ABUW_3892	A1S_3871	KZA74_18475	165.359	0.494406	0.19181	-0.555756	0.870139	0.893705	0.0443999
chromosome	dnaN	1496..2644	1149	=>	dnaN, DNA polymerase III subunit beta	dnaN	ACX60_RS00010	ABUW_0002	A1S_0002	KZA74_00010	1864.44	-0.213162	-0.278489	2.30326	0.973209	0.894028	1.56294e-09
chromosome	KZA74_18230	3,840,314..3,841,456	1143	<=	acyl-CoA desaturase	acoAd	ACX60_RS17875	ABUW_3842	A1S_0041	KZA74_18230	947.113	-0.254268	-0.336575	1.27183	0.973209	0.894028	0.0080173
chromosome	KZA74_03360	691,437..693,641	2205	=>	TonB-dependent receptor	TC.FEV.OM	ACX60_RS03355	ABUW_0661	A1S_2829	KZA74_03360	1244.57	-0.0529462	-0.18532	-1.31705	0.988413	0.894028	2.62319e-07
chromosome	hemF	410,776..411,726	951	<=	hemF, oxygen-dependent coproporphyrinogen oxidase	CPOX, hemF	ACX60_RS01950	ABUW_0377	A1S_3108	KZA74_01945	2008.75	-0.0198648	-0.275591	1.88646	0.992114	0.894028	6.87045e-07
chromosome	pnuC	2,923,795..2,924,376	582	<=	pnuC, nicotinamide riboside transporter PnuC	pnuC	ACX60_RS13665	ABUW_2956	A1S_0942	KZA74_13970	222.377	0.0548761	0.301786	-0.161955	0.989848	0.894838	0.734667
chromosome	pncB	110,315..111,529	1215	=>	pncB, nicotinate phosphoribosyltransferase	pncB, NAPRT1	ACX60_RS00510	ABUW_0101	A1S_3380	KZA74_00510	1248.88	-0.375696	-0.239236	0.325296	0.973209	0.895015	0.36595
chromosome	KZA74_14150	2,965,361..2,966,512	1152	<=	EmrA/EmrK family multidrug efflux transporterperiplasmic adaptor subunit	emrA	ACX60_RS13840	ABUW_3020	A1S_0908	KZA74_14150	718.586	-0.556955	-0.280254	0.0847236	0.973209	0.895982	0.85018
chromosome	KZA74_10645	2,218,538..2,218,780	243	<=	KZA74_10645	NA	ACX60_RS10375	ABUW_2270	A1S_3682	KZA74_10645	581.059	-0.00903749	-0.41269	2.10265	0.999942	0.896258	0.000289799
chromosome	KZA74_07715	1,631,682..1,632,044	363	=>	KZA74_07715	NA	ACX60_RS07675	ABUW_0807|ABUW_1322	A1S_3757	KZA74_07715	75.2106	-0.609351	-0.436587	-4.75681	0.973209	0.896328	8.21359e-13
chromosome	KZA74_11105	2,312,654..2,314,660	2007	=>	alpha/beta fold hydrolase	NA	ACX60_RS10835	ABUW_2364	A1S_1461	KZA74_11105	523.911	-0.391922	-0.213152	0.162018	0.973209	0.897898	0.627966
pAB3	KZA74_19115	111,590..112,009	420	=>	type VI secretion protein	NA	NA	NA	A1S_3544	KZA74_19115	274.157	0.420073	-0.266357	0.986808	0.973209	0.898062	0.00930548
chromosome	KZA74_03915	807,628..809,013	1386	<=	APC family permease	NA	ACX60_RS03905	ABUW_0857	A1S_2701	KZA74_03915	1103.6	-0.115758	-0.263803	1.64748	0.978617	0.898062	7.70853e-06
pAB3	KZA74_18895	66,346..67,473	1128	=>	traW, conjugal transfer protein TraW; Region: conj_TraW; NF033888	NA	NA	NA	A1S_0631	KZA74_18895	733.949	0.137893	-0.316812	1.64142	0.978617	0.898062	0.000244776
chromosome	rpoH	1,346,209..1,347,075	867	<=	rpoH, RNA polymerase sigma factor RpoH	rpoH	ACX60_RS06240	ABUW_1375	A1S_2262	KZA74_06270	3250.71	0.112637	-0.428846	2.33771	0.988413	0.898062	0.00011492
chromosome	scpB	3,055,328..3,055,924	597	=>	scpB, SMC-Scp complex subunit ScpB	scpB	ACX60_RS14310	ABUW_3115	A1S_0811	KZA74_14625	475.835	0.00272542	-0.188317	1.50527	0.999942	0.898062	4.52536e-09
chromosome	KZA74_07095	1,517,585..1,518,553	969	<=	alpha/beta hydrolase	NA	ACX60_RS07065	ABUW_1623	A1S_2099	KZA74_07095	653.438	0.234043	0.292099	1.26959	0.973209	0.898744	0.00242772
chromosome	KZA74_00240	55,130..55,375	246	<=	KZA74_00240	NA	ACX60_RS00235	ABUW_0048	A1S_3434	KZA74_00240	98.7195	-0.307698	-0.249332	-0.175206	0.973209	0.899809	0.655656
chromosome	thiL	100,054..100,971	918	<=	thiL, thiamine-phosphate kinase	thiL	ACX60_RS00455	ABUW_0092	A1S_3391	KZA74_00455	809.104	-0.298066	-0.195724	0.580212	0.973209	0.899809	0.0439846
chromosome	KZA74_01230	262,026..263,030	1005	<=	virS, araC family transcriptional regulator	virS	ACX60_RS01245	ABUW_0238	A1S_3247	KZA74_01230	401.057	0.481279	0.367624	-3.05842	0.973209	0.899809	4.81214e-09
chromosome	KZA74_05040	1,057,890..1,059,590	1701	=>	Hsp70 family protein	hscC, hsp70	ACX60_RS05020	NA	A1S_2510	KZA74_05040	1558.91	-0.590206	-0.346442	0.119208	0.973209	0.899809	0.832468
chromosome	KZA74_07555	1,607,956..1,608,331	376	=>	KZA74_07555	NA	ACX60_RS07520	NA	NA	KZA74_07555	43.0288	0.387595	0.371272	0.259141	0.973209	0.899809	0.658707
chromosome	KZA74_09745	2,051,376..2,051,642	267	<=	KZA74_09745	NA	ACX60_RS09480	ABUW_2145	A1S_3715	KZA74_09745	410.796	-0.739738	0.445451	0.227934	0.973209	0.899809	0.752387
chromosome	mdcA	2,350,538..2,352,217	1680	<=	mdcA, malonate decarboxylase subunit alpha	mdcA	ACX60_RS11020	ABUW_2402	A1S_1421	KZA74_11290	637.155	-0.747102	-0.42556	-3.67549	0.973209	0.899809	8.60834e-10
chromosome	KZA74_12225	2,557,855..2,558,466	612	<=	chloramphenicol acetyltransferase CAT	NA	ACX60_RS11935	ABUW_2640	A1S_1245	KZA74_12225	241.828	-0.155046	-0.202693	-1.11867	0.973209	0.899809	0.000104948
chromosome	KZA74_12545	2,620,920..2,621,264	345	<=	KZA74_12545	NA	ACX60_RS12265	ABUW_2733	A1S_3625	KZA74_12545	108.162	0.211138	0.266248	-1.53818	0.973209	0.899809	6.75877e-05
chromosome	KZA74_14170	2,969,568..2,970,473	906	<=	TIGR01777 family oxidoreductase	K07071	ACX60_RS13860	ABUW_3024	A1S_0904	KZA74_14170	507.077	-0.317739	-0.194318	-0.260096	0.973209	0.899809	0.382525
chromosome	leuD	3,432,235..3,432,882	648	<=	leuD, 3-isopropylmalate dehydratase small subunit	leuD, IPMI-S	ACX60_RS16020	ABUW_3462	A1S_0418	KZA74_16345	309.126	-0.26865	-0.309662	0.359059	0.973209	0.899809	0.450399
chromosome	KZA74_17455	3,673,778..3,675,370	1593	<=	TerC family protein	terC	ACX60_RS17120	ABUW_3694	A1S_0190	KZA74_17455	4477.9	-0.33354	-0.410301	1.44567	0.973209	0.899809	0.0156784
chromosome	KZA74_17620	3,708,435..3,708,980	546	=>	gpx, glutathione peroxidase	gpx	ACX60_RS17285	ABUW_3729	A1S_0159	KZA74_17620	746.485	0.237697	0.297461	2.88223	0.973209	0.899809	3.41017e-12
chromosome	KZA74_03920	809,279..810,463	1185	<=	iron-containing alcohol dehydrogenase	E1.1.1.1, adh	ACX60_RS03910	ABUW_0858	A1S_2702	KZA74_03920	2448.75	-0.225962	-0.387729	1.80494	0.97575	0.899809	0.00128246
chromosome	KZA74_08165	1,721,945..1,722,190	246	<=	KZA74_08165	NA	ACX60_RS08105	ABUW_1775	NA	KZA74_08165	1425.93	0.354207	-0.56143	-0.218476	0.97575	0.899809	0.810132
chromosome	KZA74_02920	593,648..594,217	570	<=	LemA family protein	lemA	ACX60_RS02915	ABUW_0534	A1S_2911	KZA74_02920	180.195	0.101371	0.369944	-0.16101	0.988413	0.899809	0.786245
chromosome	KZA74_17920	ND	ND	ND	alr, alanine racemase	alr	ACX60_RS17585	ABUW_3788	A1S_0096	KZA74_17920	2489.25	0.0566194	-0.572247	-1.18103	0.991879	0.899809	0.171572
chromosome	KZA74_12485	2,607,858..2,608,445	588	<=	pcm, Protein-L-isoaspartate O-methyltransferase	pcm	ACX60_RS12205	ABUW_2721	A1S_1203	KZA74_12485	341.215	-0.203294	-0.211083	0.294443	0.973209	0.900036	0.359129
chromosome	KZA74_02470	502,514..503,113	600	<=	TetR/AcrR family transcriptional regulator	NA	ACX60_RS02470	ABUW_0482	A1S_3011	KZA74_02470	217.743	0.286782	0.480936	-2.08235	0.97575	0.900036	0.00309283
chromosome	KZA74_08210	1,729,476..1,729,850	375	<=	DUF2750 domain-containing protein	NA	ACX60_RS08150	ABUW_1784	A1S_1934	KZA74_08210	411.873	0.379279	-0.422525	1.476	0.973209	0.900208	0.0171092
chromosome	KZA74_09580	2,017,484..2,017,729	246	<=	ferredoxin family protein	NA	ACX60_RS09315	ABUW_2112	A1S_1719	KZA74_09580	37.2795	0.310346	0.392871	-3.67689	0.973209	0.900208	1.11343e-08
chromosome	KZA74_03315	682,404..683,864	1461	<=	amino acid permease	lysP	ACX60_RS03310	ABUW_0652	A1S_2838	KZA74_03315	1300.05	-0.0864124	-0.275192	1.72584	0.988064	0.900208	9.9516e-06
chromosome	KZA74_02050	433,512..434,462	951	<=	metal-dependent hydrolase	K07044	ACX60_RS02055	ABUW_0398	A1S_3088	KZA74_02050	391.18	0.138814	-0.161849	-0.218765	0.973209	0.902412	0.379252
chromosome	KZA74_04205	877,933..878,871	939	=>	NAD(+)/NADH kinase	NA	ACX60_RS04185	ABUW_0914	A1S_2667	KZA74_04205	493.379	-0.593576	-0.363794	0.117574	0.973209	0.902412	0.844361
chromosome	KZA74_05730	1,225,768..1,226,238	471	=>	DUF3015 domain-containing protein	NA	ACX60_RS05700	ABUW_1192	A1S_3801,3802	KZA74_05730	2252.41	-0.88272	-0.454068	0.735819	0.973209	0.902412	0.294204
chromosome	KZA74_09820	2,063,088..2,063,678	591	<=	DUF937 domain-containing protein	NA	ACX60_RS09555	ABUW_2161	A1S_1676	KZA74_09820	797.458	-0.324502	-0.390466	0.137872	0.973209	0.902412	0.82999
chromosome	orn	3,315,858..3,316,424	567	<=	orn, oligoribonuclease	orn, REX2, REXO2	ACX60_RS15450	ABUW_3367	A1S_0532	KZA74_15775	827.309	-0.464361	-0.300933	1.15346	0.973209	0.902412	0.00916304
chromosome	nreB	3,243,391..3,244,641	1251	=>	nreB, nickel resistance MFS transporter NreB	nreB	ACX60_RS15145	ABUW_3286	A1S_0596	KZA74_15465	393.693	0.250282	0.346148	-2.42775	0.974448	0.902412	9.92928e-07
chromosome	KZA74_00050	12,384..13,388	1005	=>	KZA74_00050	NA	ACX60_RS00050	ABUW_0010	A1S_0010	KZA74_00050	503.34	0.116604	-0.19944	-1.77481	0.97575	0.902412	3.88583e-10
chromosome	KZA74_10850	2,257,876..2,260,413	2538	=>	fimbrial biogenesis outer membrane usherprotein	fimD, fimC, mrkC, htrE, cssD	ACX60_RS10580	ABUW_2312	A1S_1508	KZA74_10850	372.178	0.261272	0.386847	-2.39528	0.97575	0.902807	1.86489e-05
chromosome	KZA74_10555	2,201,298..2,201,852	555	<=	gspH, type II secretion system GspH family protein	gspH	ACX60_RS10285	ABUW_2252	A1S_1562	KZA74_10555	146.446	-0.0981806	-0.276227	0.432321	0.986689	0.902807	0.305304
chromosome	KZA74_03240	664,209..666,344	2136	<=	enoyl-CoA hydratase/isomerase family protein	fadJ	ACX60_RS03235	ABUW_0637	A1S_2853	KZA74_03240	1022.88	-0.377154	-0.19419	-1.26831	0.973209	0.903097	5.32536e-06
chromosome	KZA74_01065	237,230..237,613	384	<=	peptide signal protein	psp	ACX60_RS01085	NA	A1S_3273	KZA74_01065	107.325	-0.200471	0.273361	-0.00253277	0.97575	0.903097	0.995986
chromosome	KZA74_10895	2,268,409..2,269,641	1233	<=	integrase family protein	NA	NA	NA	A1S_1501	KZA74_10895	155.523	0.205954	0.300545	-1.88445	0.97575	0.903097	1.76215e-05
chromosome	hisF	263,820..264,578	759	<=	hisF, imidazole glycerol phosphate synthase subunitHisF	hisF	ACX60_RS01255	ABUW_0240	A1S_3245	KZA74_01240	1068.14	0.013435	-0.265168	0.557903	0.995974	0.903097	0.169005
chromosome	uvrA	213,503..216,337	2835	<=	uvrA, excinuclease ABC subunit UvrA	uvrA	ACX60_RS00975	ABUW_0189	A1S_3295	KZA74_00955	4697.04	0.952747	-0.389918	0.824924	0.96971	0.903339	0.168948
chromosome	iscA	2,116,405..2,116,725	321	=>	iscA, iron-sulfur cluster assembly protein IscA	iscA	ACX60_RS09795	ABUW_2204	A1S_1630	KZA74_10060	1152.1	0.828606	-0.503202	0.984573	0.973209	0.903339	0.205048
chromosome	KZA74_08285	1,739,605..1,740,609	1005	<=	adenosine kinase	iolC	ACX60_RS08225	ABUW_1799	A1S_1922	KZA74_08285	1422.88	-0.136344	-0.285747	1.39486	0.978617	0.903339	0.00083587
chromosome	KZA74_04485	938,755..939,876	1122	<=	efflux RND transporter periplasmic adaptorsubunit	ABC-2.TX	ACX60_RS04465	ABUW_0967	A1S_2620	KZA74_04485	627.515	-0.145488	-0.168789	-0.125261	0.973209	0.903717	0.649514
chromosome	KZA74_06280	1,347,829..1,348,041	213	=>	cspG, cold-shock protein	cspA, cspG	ACX60_RS06250	ABUW_1377	A1S_2261	KZA74_06280	15204.9	-1.0509	-0.603076	2.27435	0.973209	0.903717	0.0114554
chromosome	KZA74_15195	3,186,292..3,187,743	1452	<=	C13 family peptidase	NA	ACX60_RS14880	ABUW_3234	A1S_0701	KZA74_15195	1486.43	-0.221633	-0.256302	0.312653	0.973209	0.903717	0.438572
chromosome	fabR	1,120,674..1,121,369	696	<=	fabR, HTH-type transcriptional repressor FabR	fabR	ACX60_RS05275	ABUW_1103	A1S_2460	KZA74_05300	372.105	-0.122293	0.202189	1.69987	0.97575	0.903717	2.35108e-09
chromosome	KZA74_06005	1,290,704..1,291,639	936	<=	ABC transporter ATP-binding protein	ABC-2.A	ACX60_RS05980	ABUW_1248	A1S_2311	KZA74_06005	403.481	0.149325	0.324252	-0.330052	0.978617	0.903717	0.524297
chromosome	KZA74_05045	1,059,642..1,061,603	1962	<=	molecular chaperone	NA	ACX60_RS05025	NA	A1S_2509	KZA74_05045	488.736	-0.114656	0.279879	1.35182	0.98075	0.903717	0.000969998
chromosome	KZA74_01990	420,576..421,217	642	=>	mlaC, ABC transporter substrate-binding protein	mlaC	ACX60_RS01995	ABUW_0386	A1S_3100	KZA74_01990	2761.59	-0.158715	-0.493436	1.47927	0.987406	0.903802	0.0473933
pAB3	KZA74_18660	17,811..18,080	270	<=	KZA74_18660	NA	NA	NA	NA	KZA74_18660	264.044	0.102371	-0.31714	0.302051	0.987406	0.903802	0.553075
chromosome	KZA74_01160	251,348..251,683	336	<=	hxlR, transcriptional regulator	hxlR	ACX60_RS01175	ABUW_0227	A1S_3259	KZA74_01160	107.717	0.22975	0.224782	0.882293	0.973209	0.904023	0.00675081
chromosome	KZA74_01380	289,821..290,201	381	<=	KZA74_01380	NA	ACX60_RS01390	NA	A1S_3887	KZA74_01380	3523.75	-1.11426	-0.494625	-1.04417	0.973209	0.904023	0.173297
chromosome	KZA74_02595	526,942..528,478	1537	=>	16S ribosomal RNA	16s	NA	NA	A1S_r	KZA74_02595	3.53088	1.60581	0.950854	-4.43366	0.973209	0.904023	0.0184316
chromosome	KZA74_07085	1,514,743..1,516,254	1512	<=	aldehyde dehydrogenase family protein	aldB	ACX60_RS07055	ABUW_1621	A1S_2102	KZA74_07085	11124.4	-0.846917	-0.55989	1.40488	0.973209	0.904023	0.103716
chromosome	iscU	2,115,988..2,116,374	387	=>	iscU, Fe-S cluster assembly scaffold IscU	iscU, nifU	ACX60_RS09790	ABUW_2203	A1S_1631	KZA74_10055	2144.62	0.300527	-0.4984	0.824025	0.97575	0.904023	0.29248
chromosome	rpoZ	342,332..342,610	279	<=	rpoZ, DNA-directed RNA polymerase subunit omega	rpoZ	ACX60_RS01625	ABUW_0310	A1S_3171	KZA74_01620	2557.59	-0.203423	-0.494824	1.59264	0.980598	0.904023	0.0333494
chromosome	KZA74_09450	1,989,653..1,990,996	1344	=>	MFS transporter	NA	ACX60_RS09185	ABUW_2090	A1S_1739	KZA74_09450	370.958	0.112966	0.383208	-3.17991	0.988413	0.904023	1.15817e-08
chromosome	KZA74_14245	2,984,835..2,985,617	783	<=	GNAT family N-acetyltransferase	NA	ACX60_RS13935	ABUW_3039	A1S_0889	KZA74_14245	180.328	0.106058	0.368533	-0.900973	0.988413	0.904023	0.112859
chromosome	KZA74_02950	599,701..599,919	219	=>	helix-turn-helix domain-containing protein	NA	ACX60_RS02945	NA	NA	KZA74_02950	111.167	0.0236382	0.264753	-0.381226	0.991879	0.904023	0.357976
chromosome	KZA74_09025	1,899,617..1,900,045	429	=>	KZA74_09025	NA	ACX60_RS08970	NA	NA	KZA74_09025	93.5175	0.0274041	0.220117	-0.535104	0.991879	0.904023	0.113809
chromosome	KZA74_11560	2,402,687..2,403,859	1173	=>	isovaleryl-CoA dehydrogenase	IVD, ivd	ACX60_RS11275	ABUW_2452	A1S_1376	KZA74_11560	1645.7	0.0444287	-0.677333	-2.43338	0.993571	0.904023	0.0170981
chromosome	KZA74_05240	1,105,923..1,106,738	816	=>	PhzF family phenazine biosynthesis protein	phzF	ACX60_RS05215	ABUW_1081	A1S_2471	KZA74_05240	309.283	-0.00148266	-0.179257	0.0526356	0.999942	0.904023	0.859034
chromosome	KZA74_01920	404,155..404,409	255	<=	PspC family transcriptional regulator	pspC	ACX60_RS01925	ABUW_0372	A1S_3113	KZA74_01920	3124.2	-0.481374	-0.504816	0.758594	0.973209	0.904708	0.342776
chromosome	KZA74_06770	1,441,075..1,441,830	756	<=	RDD family protein	NA	ACX60_RS06740	ABUW_1554	A1S_2165	KZA74_06770	623.762	-0.309019	-0.362306	1.6322	0.973209	0.904708	0.00252687
chromosome	KZA74_13560	2,835,829..2,836,347	519	<=	KZA74_13560	NA	ACX60_RS13270	ABUW_2875	A1S_1021	KZA74_13560	412.226	-0.490274	-0.223706	1.26593	0.973209	0.904708	0.000101498
chromosome	KZA74_14860	3,108,089..3,108,382	294	<=	cold shock domain-containing protein	csp	ACX60_RS14545	ABUW_3163	A1S_0766	KZA74_14860	377.627	-0.372774	-0.35963	1.10178	0.973209	0.904708	0.0438226
pAB3	KZA74_18685	20,321..21,823	1503	=>	KZA74_18685	NA	NA	NA	A1S_3477	KZA74_18685	613.568	0.226976	-0.316933	1.3714	0.97575	0.904708	0.00369626
chromosome	KZA74_11565	2,403,884..2,405,485	1602	=>	methylcrotonoyl-CoA carboxylase	E6.4.1.4B	ACX60_RS11280	ABUW_2453	A1S_1375	KZA74_11565	2677.53	-0.190838	-0.660305	-2.50869	0.988413	0.904708	0.0117303
chromosome	KZA74_01580	335,213..335,773	561	=>	TPM domain protein	TPM	ACX60_RS01590	ABUW_0303	A1S_3178	KZA74_01580	570.736	-0.655498	-0.28808	-1.92657	0.973209	0.904935	5.02828e-06
chromosome	basB	1,198,743..1,200,770	2028	<=	basB, acinetobactin non-ribosomal peptide synthetasesubunit BasB	basB	ACX60_RS05600	ABUW_1170	A1S_2390	KZA74_05635	447.388	0.326077	0.497914	-2.17902	0.97575	0.904935	0.00365511
chromosome	gmk	342,683..343,312	630	<=	gmk, guanylate kinase	E2.7.4.8, gmk	ACX60_RS01630	ABUW_0311	A1S_3170	KZA74_01625	873.139	-0.498101	-0.243684	1.51062	0.973209	0.906349	2.36911e-05
chromosome	KZA74_10125	2,129,425..2,130,159	735	<=	histidine phosphatase family protein	NA	ACX60_RS09860	ABUW_2217	A1S_1616	KZA74_10125	696.016	-0.420103	-0.246581	0.181698	0.973209	0.906349	0.656511
chromosome	KZA74_16195	3,401,626..3,403,335	1710	=>	cation:proton antiporter	TC.KEF	ACX60_RS15870	ABUW_3432	A1S_0446	KZA74_16195	1242.82	-0.24022	-0.15487	-0.214718	0.973209	0.906349	0.383101
chromosome	KZA74_05715	1,222,197..1,223,444	1248	<=	L,D-transpeptidase	entC	ACX60_RS05685	ABUW_1189	A1S_2371	KZA74_05715	2478.96	-0.177673	-0.321838	2.5082	0.97575	0.906349	8.21541e-08
chromosome	KZA74_01265	267,053..267,955	903	<=	DMT family transporter	DMT	ACX60_RS01280	ABUW_0244	A1S_3240	KZA74_01265	322.881	0.123549	0.320982	-3.15413	0.984383	0.906349	3.06267e-11
chromosome	KZA74_10705	2,229,710..2,230,735	1026	=>	AraC family transcriptional regulator	NA	ACX60_RS10435	ABUW_2282	A1S_1533	KZA74_10705	487.539	-0.154575	0.154815	1.20225	0.973209	0.906409	7.02882e-08
chromosome	KZA74_14780	3,092,752..3,093,252	501	<=	KZA74_14780	NA	ACX60_RS14465	ABUW_3147	A1S_0779	KZA74_14780	3510.3	-1.15573	-0.566619	-0.937644	0.973209	0.906409	0.298466
chromosome	KZA74_15475	3,245,162..3,245,782	621	<=	glutathione S-transferase N-terminaldomain-containing protein	yghU, yfcG	ACX60_RS15155	ABUW_3288	A1S_0594	KZA74_15475	425.713	-0.426553	-0.221669	0.641809	0.973209	0.906409	0.0584314
chromosome	KZA74_17470	3,677,987..3,678,745	759	=>	glycoside hydrolase family 25 protein	acm	ACX60_RS17135	ABUW_3698	A1S_0187	KZA74_17470	228.369	0.174195	0.350798	0.524227	0.978617	0.906409	0.34731
chromosome	KZA74_06030	1,294,902..1,295,063	162	<=	KZA74_06030	NA	NA	NA	NA	KZA74_06030	25.3168	0.000335143	0.533639	-4.9973	0.999942	0.906409	8.18833e-07
chromosome	KZA74_16370	3,436,627..3,437,112	486	=>	RNA pyrophosphohydrolase	nudH	ACX60_RS16045	ABUW_3467	A1S_0414	KZA74_16370	1549.21	-0.378903	-0.437977	0.165173	0.973209	0.906522	0.823882
chromosome	recN	3,538,614..3,540,281	1668	=>	recN, DNA repair protein RecN	recN	ACX60_RS16485	ABUW_3557	A1S_0321	KZA74_16815	806.269	-0.610348	-0.184163	0.160818	0.497051	0.907866	0.598874
chromosome	KZA74_15250	3,198,707..3,199,546	840	<=	filA, protein FilA	filA	ACX60_RS14935	ABUW_3245	A1S_0690	KZA74_15250	2489.36	-1.00812	-0.391305	-0.263208	0.932568	0.907866	0.689912
chromosome	pgaB	1,448,089..1,449,918	1830	=>	pgaB, poly-beta-1,6-N-acetyl-D-glucosamineN-deacetylase PgaB	pgaB	ACX60_RS06760	ABUW_1558	A1S_2161	KZA74_06790	711.028	-0.704113	-0.324201	-0.184162	0.973209	0.907866	0.737818
chromosome	KZA74_08365	1,760,692..1,761,609	918	<=	alpha/beta hydrolase	menH	ACX60_RS08305	ABUW_1817	A1S_1907	KZA74_08365	377.377	-0.198145	-0.157622	0.493504	0.973209	0.907866	0.0403999
chromosome	KZA74_18305	3,854,220..3,855,020	801	=>	ATP-binding cassette domain-containing protein	ssuB	ACX60_RS17950	ABUW_3857	A1S_0026	KZA74_18305	274.24	0.466076	0.372501	-1.1033	0.973209	0.907866	0.0577884
chromosome	KZA74_13685	2,860,912..2,861,400	489	=>	esterase	NA	ACX60_RS13390	ABUW_2900	A1S_0997	KZA74_13685	166.126	0.258733	0.341178	0.00622862	0.974111	0.907866	0.992013
chromosome	KZA74_00925	204,760..205,092	333	=>	yjcH, innner membrane protein	yjiH	ACX60_RS00945	ABUW_0183	A1S_3301	KZA74_00925	1304.12	-0.401551	-0.576979	-1.43357	0.97575	0.907866	0.113183
chromosome	KZA74_02645	537,354..537,776	423	=>	acyl-CoA thioesterase	yciA	ACX60_RS02645	ABUW_0518	A1S_2947	KZA74_02645	432.637	0.143011	-0.213159	0.27693	0.97575	0.907866	0.418894
chromosome	KZA74_06490	1,385,261..1,386,163	903	<=	ATP-binding protein	K06923	ACX60_RS06460	ABUW_1483	A1S_2220	KZA74_06490	188.782	0.115815	0.300387	-1.43681	0.984557	0.907866	0.00165478
chromosome	KZA74_08105	1,705,718..1,707,172	1455	<=	SulP family inorganic anion transporter	bicA, sulP, TC.SULP	ACX60_RS08045	ABUW_1760	A1S_1953	KZA74_08105	355.295	0.11368	0.327365	-0.403361	0.986689	0.907866	0.448753
chromosome	trpS	832,647..833,660	1014	<=	trpS, tryptophan--tRNA ligase	WARS, trpS	ACX60_RS04010	ABUW_0881	A1S_2720	KZA74_04030	982.31	0.0568335	-0.206307	2.14069	0.988413	0.907866	9.39322e-13
chromosome	KZA74_13995	2,929,520..2,929,861	342	<=	FKBP-type peptidyl-prolyl cis-trans isomerase	E5.2.1.8	ACX60_RS13690	ABUW_2961	A1S_0937	KZA74_13995	331.998	-0.0475705	-0.160291	0.107474	0.988413	0.907866	0.686324
chromosome	KZA74_16480	3,464,657..3,464,911	255	=>	type B 50S ribosomal protein L31	rpmE, RP-L31	ACX60_RS16155	ABUW_3490	A1S_0391	KZA74_16480	227.067	0.156846	0.59349	4.29198	0.988413	0.907866	8.55229e-07
chromosome	KZA74_17945	3,778,115..3,778,495	381	<=	ester cyclase	NA	ACX60_RS17610	ABUW_3793	A1S_0091	KZA74_17945	741.826	0.108437	-0.39881	-0.380926	0.988413	0.907866	0.565479
chromosome	KZA74_06715	1,431,072..1,431,806	735	=>	proteasome-type protease	K07395	ACX60_RS06685	ABUW_1543	A1S_2177	KZA74_06715	1081.42	0.0328617	-0.301029	-0.623613	0.991879	0.907866	0.191216
chromosome	KZA74_13950	2,921,716..2,922,015	300	<=	KZA74_13950	NA	ACX60_RS13645	ABUW_2952	A1S_0946	KZA74_13950	85.1058	-0.297602	-0.393796	-3.63039	0.97575	0.908188	2.24941e-09
chromosome	KZA74_17795	3,738,632..3,738,940	309	<=	BolA family transcriptional regulator	bolA	ACX60_RS17460	ABUW_3763	A1S_0122	KZA74_17795	237.703	0.270001	-0.181218	0.804752	0.973209	0.909182	0.00292896
[truncated: 1,859 more rows]
